# Supplementary material for: Genetics of Major Depressive Disorder in a Homogeneous Population with Uniform Phenotyping
Source: medRxiv preprint, doi:10.1101/2025.05.14.25325937, version 1 (2025-05-14)
Supplement: Supplementary Material [file 325937_file03.xlsx]

## Sheet: MDD GWAS top1000
CHR	SNP	POS	A1	A2	N	AF1	BETA	SE	P	INFO	MAF
1	rs3818852	100160177	A	T	64941	0.379857	-0.0763022	0.0143228	3.26255e-08	0.994838	0.379857
1	rs4908005	100161691	G	T	64941	0.380216	-0.0761054	0.0143171	3.49283e-08	0.995249	0.380216
1	rs6657621	100161133	C	T	64941	0.380395	-0.0758307	0.0143197	3.93619e-08	0.995365	0.380395
1	rs3737899	100154055	T	G	64941	0.379838	-0.0743013	0.0143137	7.23034e-08	0.995924	0.379838
18	rs4131791	52747871	C	T	64941	0.57636	0.0702	0.0140516	2.16911e-07	0.998139	0.42364
18	rs4128242	52747689	T	C	64941	0.576381	0.0697135	0.0140488	2.61492e-07	0.998123	0.423619
18	rs12966547	52752017	G	A	64941	0.576649	0.0695781	0.0140498	2.76333e-07	0.998483	0.423351
18	rs4801131	52752700	C	T	64941	0.576695	0.0695593	0.0140498	2.7837e-07	0.998337	0.423305
18	rs35360904	52751297	T	G	64941	0.576612	0.0693788	0.0140492	2.98418e-07	0.998378	0.423388
18	rs4309482	52750469	A	G	64941	0.576646	0.0693451	0.0140496	3.02651e-07	0.998461	0.423354
18	rs12969453	52751708	A	G	64941	0.576628	0.0693275	0.0140492	3.04485e-07	0.998377	0.423372
18	rs11874716	52750688	T	G	64941	0.57657	0.0692765	0.0140483	3.10119e-07	0.998505	0.42343
1	rs1538364	100164547	A	G	64941	0.314453	-0.0730766	0.0149767	4.14912e-07	0.994833	0.314453
1	rs2185132	100162805	C	T	64941	0.320203	-0.0722699	0.0148991	4.84816e-07	0.995642	0.320203
18	rs12327102	50787839	G	C	64941	0.463729	-0.066713	0.0139481	6.96056e-07	0.996895	0.463729
16	rs62037142	57477652	C	T	64941	0.984896	-0.275673	0.0577606	6.97128e-07	0.97367	0.0151041
1	rs150207136	119607219	G	A	64941	0.978154	-0.237707	0.0499191	7.53036e-07	0.894156	0.0218459
16	rs62037107	57441564	C	T	64941	0.985681	-0.280442	0.0590125	7.76504e-07	0.981629	0.0143186
18	rs12969597	50782037	G	A	64941	0.463753	-0.0663835	0.0139496	7.917e-07	0.996952	0.463753
18	rs4940252	50833083	A	G	64941	0.465545	-0.0663452	0.0139693	8.323e-07	0.993888	0.465545
1	rs1970168	232761116	G	A	64941	0.510165	0.0669349	0.0141456	9.13326e-07	0.972561	0.489835
1	rs6424239	232758337	G	A	64941	0.507004	0.066855	0.0141989	1.03331e-06	0.964071	0.492996
4	rs10000918	186268576	A	G	64941	0.740428	0.07487	0.015906	1.04332e-06	0.990649	0.259572
18	rs4643406	50818891	C	T	64941	0.478673	-0.0656608	0.013956	1.05394e-06	0.992853	0.478673
16	rs62037104	57435665	C	A	64941	0.985609	-0.274812	0.058928	1.24738e-06	0.979496	0.0143907
5	rs33935044	21145325	A	T	64941	0.983528	0.279862	0.060103	1.29532e-06	0.834233	0.016472
16	rs62037145	57496927	T	C	64941	0.985694	-0.27624	0.0593403	1.30375e-06	0.969932	0.0143058
1	rs3766588	100156658	T	C	64941	0.319953	-0.0694158	0.0148866	1.31305e-06	0.996874	0.319953
4	rs138362425	75121348	C	A	64941	0.98368	0.301049	0.0647973	1.36577e-06	0.72249	0.0163201
18	rs1431197	50791960	G	A	64941	0.473415	-0.0647323	0.0139335	1.43542e-06	0.996222	0.473415
1	rs1972357	232760215	T	C	64941	0.505564	0.0658023	0.0141703	1.4503e-06	0.969154	0.494436
1	rs1972358	232760195	T	C	64941	0.505619	0.0658017	0.0141706	1.4513e-06	0.969174	0.494381
18	rs11877496	50828902	C	T	64941	0.47704	-0.0647553	0.0139463	1.45476e-06	0.993289	0.47704
18	rs17411339	50807359	A	G	64941	0.541407	-0.0645358	0.0139132	1.49775e-06	0.997123	0.458593
18	rs11082975	50824885	G	C	64941	0.544954	-0.0646039	0.0139336	1.51264e-06	0.995428	0.455046
18	rs17411548	50822943	G	T	64941	0.544984	-0.0645782	0.0139333	1.52652e-06	0.995405	0.455016
18	rs1431196	50832102	A	G	64941	0.54436	-0.064455	0.0139299	1.58811e-06	0.995858	0.45564
18	rs62097992	50835863	T	C	64941	0.544423	-0.064275	0.0139288	1.69538e-06	0.995993	0.455577
18	rs11873021	50836414	A	G	64941	0.544427	-0.0641882	0.0139284	1.74945e-06	0.99603	0.455573
18	rs72925341	50827476	C	T	64941	0.545117	-0.064205	0.0139327	1.75194e-06	0.995434	0.454883
16	rs62037102	57432157	C	T	64941	0.985412	-0.268791	0.0584646	1.76593e-06	0.98131	0.014588
18	rs7231178	50753741	G	A	64941	0.446048	-0.0643182	0.013981	1.81809e-06	0.997223	0.446048
1	rs834990	100116850	G	A	64941	0.379778	-0.0655326	0.0142955	1.97058e-06	0.996708	0.379778
18	rs62097994	50840962	T	A	64941	0.545597	-0.0637275	0.0139209	2.04734e-06	0.996955	0.454403
18	rs1979914	50854411	G	A	64941	0.545673	-0.0636903	0.0139133	2.04861e-06	0.998067	0.454327
18	rs1346914	50845830	G	T	64941	0.54559	-0.0636295	0.0139174	2.11002e-06	0.997385	0.45441
18	rs2043145	50851107	A	G	64941	0.545605	-0.0635733	0.0139144	2.14279e-06	0.997949	0.454395
4	rs1812114	186280804	T	C	64941	0.75243	0.0741022	0.0162203	2.14458e-06	0.984668	0.24757
18	rs62098012	50862311	C	T	64941	0.545407	-0.0635345	0.0139105	2.15872e-06	0.998451	0.454593
18	rs7237127	50879700	T	A	64941	0.462318	-0.0635888	0.0139345	2.19166e-06	0.996976	0.462318
13	rs7491779	82485534	A	G	64941	0.682216	-0.0682902	0.0149618	2.21063e-06	0.987026	0.317784
18	rs17411061	50795113	C	T	64941	0.550949	-0.063595	0.0139478	2.25378e-06	0.995605	0.449051
18	rs62098042	50902560	G	A	64941	0.546619	-0.0634762	0.0139249	2.2594e-06	0.996748	0.453381
18	rs62098043	50902578	A	G	64941	0.546619	-0.0634762	0.0139249	2.2594e-06	0.996748	0.453381
18	rs62098014	50869085	T	C	64941	0.545371	-0.0633666	0.0139078	2.28575e-06	0.998746	0.454629
18	rs10502971	50887961	G	A	64941	0.542479	-0.0632924	0.0138938	2.29366e-06	0.999674	0.457521
18	rs2047914	50850307	C	T	64941	0.545389	-0.0633761	0.0139144	2.30334e-06	0.997951	0.454611
20	rs36074839	55285396	A	C	64941	0.97859	-0.232932	0.0512205	2.31931e-06	0.870756	0.0214099
18	rs62098020	50882781	C	T	64941	0.545438	-0.0633066	0.0139036	2.32042e-06	0.999292	0.454562
18	rs11664320	50872623	T	C	64941	0.545404	-0.0633067	0.0139061	2.32947e-06	0.998805	0.454596
18	rs11660938	50812736	G	T	64941	0.554204	-0.0635371	0.0139576	2.34172e-06	0.995062	0.445796
18	rs62097985	50810675	C	T	64941	0.553546	-0.0634969	0.0139536	2.36058e-06	0.995136	0.446454
18	rs62097995	50843233	T	A	64941	0.54552	-0.0632979	0.0139195	2.39131e-06	0.997037	0.45448
18	rs17411025	50792476	C	G	64941	0.551119	-0.0634007	0.0139422	2.39842e-06	0.996036	0.448881
18	rs56030110	50886590	A	T	64941	0.545447	-0.0631913	0.0139019	2.41367e-06	0.999643	0.454553
18	rs11660187	50801646	C	A	64941	0.551875	-0.0634076	0.0139479	2.41526e-06	0.995392	0.448125
13	rs7336437	82485701	G	A	64941	0.682278	-0.0680559	0.0149764	2.44519e-06	0.985682	0.317722
18	rs62098017	50875225	A	C	64941	0.545641	-0.0631751	0.0139076	2.45116e-06	0.998665	0.454359
18	rs11662416	50847784	T	G	64941	0.545288	-0.0631829	0.0139149	2.47415e-06	0.997765	0.454712
18	rs62098022	50888891	T	C	64941	0.545421	-0.0631199	0.0139012	2.47461e-06	0.9997	0.454579
18	rs1504744	50889558	G	A	64941	0.545449	-0.0631111	0.0139012	2.48279e-06	0.99967	0.454551
18	rs62097987	50819236	T	G	64941	0.553932	-0.063395	0.0139661	2.49936e-06	0.993818	0.446068
18	rs17503448	50857663	T	C	64941	0.545599	-0.0631335	0.0139135	2.51425e-06	0.9982	0.454401
4	rs13120118	81404503	G	A	64941	0.975096	0.232855	0.0513783	2.51865e-06	0.762217	0.0249044
18	rs17412782	50888351	T	C	64941	0.545422	-0.0630724	0.0139015	2.51924e-06	0.999683	0.454578
18	rs62097986	50818827	C	A	64941	0.55478	-0.0633905	0.0139713	2.52681e-06	0.993241	0.44522
18	rs1504746	50858019	T	C	64941	0.54565	-0.063116	0.0139175	2.54778e-06	0.99833	0.45435
18	rs9807529	50944901	A	G	64941	0.536607	-0.0632315	0.013952	2.58312e-06	0.993557	0.463393
18	rs62097996	50843269	C	A	64941	0.545277	-0.0630774	0.0139189	2.58863e-06	0.997072	0.454723
13	rs9601762	82486941	A	G	64941	0.687368	-0.068078	0.0150315	2.63137e-06	0.985417	0.312632
18	rs17501820	50778737	C	T	64941	0.551515	-0.0631627	0.0139464	2.63307e-06	0.995196	0.448485
3	rs6778694	29540536	G	A	64941	0.971733	-0.189292	0.0418187	2.63327e-06	0.991299	0.0282668
18	rs4405620	50884529	C	A	64941	0.545557	-0.062921	0.0139014	2.66222e-06	0.999604	0.454443
13	rs17074901	82490139	T	A	64941	0.687835	-0.068059	0.0150346	2.66325e-06	0.9855	0.312165
13	rs9593619	82487887	T	C	64941	0.687782	-0.0680433	0.0150363	2.68461e-06	0.985357	0.312218
18	rs62098049	50904666	G	A	64941	0.545532	-0.0628933	0.0139015	2.68956e-06	0.999735	0.454468
18	rs62098044	50902747	G	C	64941	0.545532	-0.0628925	0.0139015	2.69041e-06	0.999735	0.454468
18	rs62098046	50902773	T	C	64941	0.545532	-0.0628925	0.0139015	2.69041e-06	0.999735	0.454468
18	rs62097989	50826478	A	G	64941	0.554099	-0.0631953	0.0139672	2.69318e-06	0.993645	0.445901
18	rs17504372	50903050	C	T	64941	0.545536	-0.0628881	0.0139013	2.69416e-06	0.99975	0.454464
18	rs62098048	50904562	C	G	64941	0.545536	-0.0628872	0.0139013	2.69511e-06	0.999749	0.454464
18	rs62098047	50904361	G	A	64941	0.545535	-0.0628829	0.0139014	2.69956e-06	0.999745	0.454465
18	rs62098023	50894002	A	C	64941	0.545571	-0.0628743	0.0139013	2.70745e-06	0.999608	0.454429
18	rs8091083	50870391	T	A	64941	0.464663	-0.0629563	0.0139234	2.71083e-06	0.998152	0.464663
18	rs1431181	50779412	G	A	64941	0.551527	-0.0630658	0.0139453	2.72227e-06	0.995326	0.448473
18	rs1431188	50796817	A	G	64941	0.550378	-0.0630059	0.0139428	2.77043e-06	0.995653	0.449622
3	rs139220078	29547401	T	C	64941	0.971757	-0.18896	0.0418505	2.79096e-06	0.990412	0.0282432
18	rs62097980	50796002	G	A	64941	0.551755	-0.0629878	0.0139441	2.79602e-06	0.995882	0.448245
18	rs11877505	50829023	A	G	64941	0.55384	-0.0630275	0.0139659	2.85511e-06	0.993624	0.44616
18	rs17412636	50886142	A	C	64941	0.5456	-0.0626323	0.0139018	2.95931e-06	0.999571	0.4544
18	rs7227402	50895766	G	T	64941	0.545673	-0.062638	0.013905	2.96855e-06	0.998865	0.454327
13	rs9601763	82488930	G	A	64941	0.687743	-0.067732	0.0150358	2.97885e-06	0.985387	0.312257
18	rs13381096	50949402	C	A	64941	0.538404	-0.0628826	0.0139642	2.99299e-06	0.99258	0.461596
13	rs9601764	82490043	T	C	64941	0.687687	-0.0676578	0.0150332	3.04165e-06	0.98558	0.312313
18	rs11665242	50907127	A	G	64941	0.545622	-0.0626611	0.0139324	3.07932e-06	0.995015	0.454378
12	rs73227556	125266242	C	T	64941	0.948429	-0.150415	0.0335616	3.28262e-06	0.873031	0.0515712
13	rs9601765	82491781	T	A	64941	0.687668	-0.067318	0.0150354	3.41917e-06	0.985262	0.312332
1	rs1933723	100149308	G	A	64941	0.31641	-0.0667794	0.0149316	3.48104e-06	0.996629	0.31641
1	rs1416239	100153422	C	T	64941	0.408515	-0.0631096	0.0141258	3.57866e-06	0.995977	0.408515
18	rs1367635	50861409	T	C	64941	0.467647	-0.0622585	0.0139462	3.62001e-06	0.994263	0.467647
10	rs117305118	131677502	C	T	64941	0.980823	0.288784	0.0648091	3.69486e-06	0.616737	0.0191771
1	rs9661328	100151978	G	T	64941	0.408621	-0.0630127	0.0141252	3.70042e-06	0.996044	0.40862
1	rs1338576	100152443	T	C	64941	0.408642	-0.0629974	0.0141249	3.71926e-06	0.996096	0.408642
18	rs62098013	50863861	G	A	64941	0.607557	-0.0638364	0.0143226	3.78786e-06	0.978596	0.392443
18	rs1972044	50931080	G	A	64941	0.538004	-0.0620765	0.0139438	3.87169e-06	0.995109	0.461996
18	rs6508210	50747191	A	C	64941	0.441339	-0.0622978	0.0139947	3.87347e-06	0.997161	0.441339
16	rs2299669	4106789	A	G	64941	0.567576	-0.0629939	0.014163	3.96417e-06	0.980188	0.432424
3	rs17724295	29503877	T	C	64941	0.970563	-0.182011	0.0409575	4.00203e-06	0.99	0.0294365
18	rs11877032	50934257	A	T	64941	0.538013	-0.0619766	0.0139464	4.02904e-06	0.994719	0.461987
9	rs9299041	7103049	T	G	64941	0.527432	0.0622169	0.0140129	4.10979e-06	0.985807	0.472568
18	rs10164055	50919600	T	C	64941	0.537664	-0.0618416	0.0139407	4.19091e-06	0.99557	0.462336
13	rs615284	28192930	C	T	64941	0.601226	-0.0631268	0.0142616	4.38786e-06	0.994498	0.398774
3	rs146722625	29552136	C	G	64941	0.970179	-0.180271	0.0407556	4.43357e-06	0.989616	0.0298212
18	rs1574925	51321476	A	G	64941	0.73257	0.0697706	0.0157808	4.4829e-06	0.995876	0.26743
18	rs62099231	50724899	G	A	64941	0.458683	-0.0615411	0.0139236	4.5423e-06	0.999592	0.458683
3	rs140491430	29505541	C	A	64941	0.970635	-0.181046	0.0410029	4.61169e-06	0.990321	0.0293648
18	rs2069191	50723460	T	C	64941	0.458724	-0.0614743	0.0139242	4.65641e-06	0.999474	0.458724
18	rs7230285	50723080	G	A	64941	0.461613	-0.06141	0.0139179	4.7186e-06	0.999463	0.461613
18	rs7230446	50723179	G	A	64941	0.461611	-0.0613955	0.0139177	4.74145e-06	0.999506	0.461611
18	rs17487484	50723283	T	G	64941	0.461617	-0.0613883	0.0139177	4.75387e-06	0.999485	0.461617
18	rs6508209	50743533	G	A	64941	0.437565	-0.0616831	0.0139884	4.76005e-06	0.999156	0.437565
12	rs57115451	44844669	G	A	64941	0.96538	-0.168569	0.0382464	4.78952e-06	0.981124	0.03462
13	rs7097	28197436	C	T	64941	0.595366	-0.0628478	0.014257	4.80518e-06	0.990113	0.404634
18	rs7243019	50713243	C	T	64941	0.437531	-0.0615197	0.0139877	5.03759e-06	0.999174	0.437531
18	rs6508208	50738062	G	C	64941	0.437518	-0.0614901	0.0139877	5.09134e-06	0.99934	0.437518
10	rs113831526	124872994	G	T	64941	0.961286	-0.160632	0.036562	5.17184e-06	0.951052	0.0387144
18	rs34160346	50983439	C	G	64941	0.522367	-0.0610292	0.0139189	5.38376e-06	0.993834	0.477633
5	rs4365869	117254988	A	T	64941	0.674398	-0.0650634	0.0148747	5.66739e-06	0.985969	0.325602
8	rs72728214	131611284	G	A	64941	0.926799	0.121288	0.0277378	5.72018e-06	0.929605	0.0732008
18	rs56027651	50807090	T	A	64941	0.598274	-0.0620369	0.014212	5.97305e-06	0.986509	0.401726
18	rs7245004	50716945	C	A	64941	0.469647	-0.0606812	0.0139163	6.07423e-06	0.998815	0.469647
18	rs10221412	50724472	T	C	64941	0.437616	-0.0609789	0.0139876	6.09425e-06	0.999286	0.437616
1	rs140670946	119735038	G	T	64941	0.980126	-0.226156	0.0519249	6.10627e-06	0.908123	0.0198738
18	rs9304439	50717776	G	A	64941	0.438077	-0.0609496	0.0139852	6.13451e-06	0.998822	0.438077
1	rs834991	100116642	A	G	64941	0.372771	-0.0625506	0.014352	6.1346e-06	0.996505	0.372771
18	rs4632195	50746748	C	T	64941	0.454834	-0.0607866	0.0139454	6.13614e-06	0.997784	0.454834
10	rs74198236	52446908	C	T	64941	0.87473	-0.0960524	0.0220615	6.22228e-06	0.905735	0.12527
9	rs74409646	78635649	C	T	64941	0.952892	0.145763	0.0335057	6.30902e-06	0.965075	0.0471083
1	rs1338571	100130644	G	A	64941	0.469845	-0.0605984	0.0139225	6.34678e-06	0.993482	0.469845
14	rs11159088	75013595	G	T	64941	0.396555	0.0619244	0.0142347	6.42551e-06	0.98805	0.396555
18	rs17417046	50984997	C	T	64941	0.522487	-0.060509	0.0139192	6.47201e-06	0.993853	0.477513
18	rs12960274	51285499	T	C	64941	0.303494	0.0655783	0.0151037	6.64946e-06	0.999111	0.303494
1	rs834992	100116394	C	T	64941	0.372602	-0.0621772	0.0143451	6.8968e-06	0.997468	0.372602
18	rs56043357	45059274	C	T	64941	0.9714	-0.192364	0.0444253	6.93672e-06	0.877267	0.0285995
9	rs7869317	7104941	G	T	64941	0.539931	0.0608279	0.0140501	7.08846e-06	0.985805	0.460069
18	rs62100775	50754093	A	G	64941	0.55351	-0.0603418	0.0139539	7.24353e-06	0.996883	0.44649
1	rs1832473	100131959	C	T	64941	0.309769	-0.0648875	0.0150174	7.34929e-06	0.99598	0.309769
1	rs834989	100117525	C	T	64941	0.372568	-0.0619507	0.0143424	7.41652e-06	0.99774	0.372568
18	rs7505145	50711776	A	C	64941	0.433637	-0.0604299	0.0140161	7.69843e-06	0.998671	0.433637
9	rs4742306	7093008	G	A	64941	0.457942	-0.0605642	0.0140441	7.71537e-06	0.988328	0.457942
1	rs834988	100118812	G	T	64941	0.372542	-0.0617805	0.0143413	7.84338e-06	0.997739	0.372542
18	rs62100777	50755757	G	A	64941	0.521835	-0.059803	0.013884	7.86142e-06	0.996665	0.478165
1	rs834986	100120009	C	A	64941	0.37256	-0.0617672	0.0143406	7.87122e-06	0.99777	0.37256
18	rs2161815	51330226	A	G	64941	0.76112	0.0704191	0.0163532	7.88997e-06	0.99713	0.23888
18	rs8099160	50752610	G	A	64941	0.52186	-0.0597034	0.013882	8.116e-06	0.997056	0.47814
5	rs11745085	180644299	C	A	64941	0.876071	-0.0930524	0.021648	8.20005e-06	0.947279	0.123929
18	rs28628885	50753726	A	G	64941	0.521872	-0.0596731	0.0138831	8.21499e-06	0.996888	0.478128
18	rs8098405	50752373	A	G	64941	0.521838	-0.0596202	0.0138822	8.35659e-06	0.997092	0.478162
18	rs17488531	50754996	G	A	64941	0.524769	-0.0596402	0.0138879	8.3709e-06	0.996821	0.475231
9	rs3763651	7103816	C	T	64941	0.539842	0.0603525	0.0140549	8.41782e-06	0.985465	0.460158
18	rs9947933	51225032	A	C	64941	0.700359	-0.0650058	0.0151641	8.67394e-06	0.999005	0.299641
18	rs56400140	51246914	A	T	64941	0.700606	-0.0649968	0.0151654	8.71579e-06	0.999106	0.299394
18	rs57841322	50753609	T	C	64941	0.524779	-0.05951	0.0138866	8.74188e-06	0.99701	0.475221
18	rs35195355	51000945	C	A	64941	0.533559	-0.0597245	0.0139441	8.83162e-06	0.992374	0.466441
13	rs7334642	82483815	A	T	64941	0.651671	-0.0626128	0.0146097	8.83716e-06	0.986156	0.348329
13	rs7336284	82485808	A	C	64941	0.6516	-0.0625253	0.0146079	9.07284e-06	0.986189	0.3484
18	rs9963880	51226387	T	C	64941	0.700304	-0.0648518	0.015165	9.12016e-06	0.998896	0.299696
18	rs62098330	51055069	T	C	64941	0.528579	-0.0596088	0.0139474	9.23523e-06	0.991541	0.471421
13	rs6491219	28162051	A	G	64941	0.404448	0.060705	0.0142118	9.36627e-06	0.99701	0.404448
13	rs694609	28194806	G	A	64941	0.596242	-0.0607686	0.0142407	9.56062e-06	0.994783	0.403758
18	rs1367638	50751425	G	C	64941	0.524818	-0.0592373	0.0138851	9.58727e-06	0.99728	0.475182
12	rs60891666	44844576	C	T	64941	0.966877	-0.165599	0.0388263	9.61176e-06	0.991117	0.0331227
18	rs56005034	51225670	T	C	64941	0.700611	-0.0646799	0.0151657	9.64272e-06	0.999107	0.299389
16	rs8047038	4111525	G	A	64941	0.731492	-0.0674151	0.0158146	9.77323e-06	0.982225	0.268508
18	rs1694257	51413397	T	C	64941	0.582924	0.0602313	0.0141332	9.80503e-06	0.992454	0.417076
18	rs62100778	50758040	A	G	64941	0.518789	-0.0591341	0.0138761	9.8062e-06	0.996472	0.481211
18	rs9319767	66413978	T	A	64941	0.987789	-0.332219	0.0780749	9.82135e-06	0.64912	0.0122106
18	rs2060476	51257156	G	T	64941	0.700639	-0.0645837	0.0151656	9.94011e-06	0.999131	0.299361
18	rs60324643	51220319	T	G	64941	0.700404	-0.0646661	0.0151906	1.00134e-05	0.995658	0.299596
18	rs55943003	52754086	G	A	64941	0.741652	-0.0680882	0.0159914	1.00242e-05	0.978433	0.258348
18	rs4456576	50762855	C	G	64941	0.550333	-0.0593343	0.0139437	1.0118e-05	0.995871	0.449667
18	rs17488580	50757261	G	T	64941	0.550058	-0.0592921	0.0139382	1.01839e-05	0.996529	0.449942
18	rs8084239	50725943	T	C	64941	0.457488	-0.0592243	0.0139254	1.02591e-05	0.999638	0.457488
13	rs77945812	60291172	A	G	64941	0.959279	0.154759	0.0364202	1.02662e-05	0.930945	0.0407211
16	rs79538009	19984422	T	G	64941	0.972888	0.188437	0.0443419	1.0275e-05	0.944416	0.0271115
18	rs1865556	51223575	T	A	64941	0.300175	0.0644407	0.015158	1.02906e-05	0.999088	0.300175
18	rs7239912	51347969	C	T	64941	0.761072	0.0695036	0.0163502	1.0298e-05	0.997017	0.238928
13	rs833087	28177227	A	G	64941	0.596632	-0.0603814	0.014205	1.03492e-05	0.998855	0.403368
1	rs11240498	205468957	C	G	64941	0.209721	0.0727837	0.0171289	1.03628e-05	0.988254	0.209721
18	rs8084280	50726749	A	T	64941	0.460369	-0.0591546	0.013919	1.04121e-05	0.999603	0.460369
18	rs8084351	50726559	G	A	64941	0.460283	-0.0591495	0.0139206	1.04539e-05	0.999708	0.460283
9	rs10122120	7104617	C	T	64941	0.536308	0.059595	0.0140261	1.04617e-05	0.987355	0.463692
13	rs4941496	44902278	G	A	64941	0.723943	0.0688724	0.0162148	1.04683e-05	0.921014	0.276057
18	rs62097689	51215451	A	C	64941	0.700671	-0.0645783	0.0152074	1.053e-05	0.993874	0.299329
18	rs17488727	50760933	A	C	64941	0.55009	-0.0591935	0.0139408	1.05737e-05	0.996147	0.44991
12	rs142391702	57049410	T	A	64941	0.960618	-0.152003	0.035842	1.0706e-05	0.982598	0.0393817
13	rs7336983	82485964	G	A	64941	0.651605	-0.0620426	0.0146135	1.07133e-05	0.98624	0.348395
13	rs511644	28187347	G	A	64941	0.596589	-0.0602891	0.0142088	1.07353e-05	0.998422	0.403411
13	rs7321968	55870065	C	T	64941	0.715382	0.0651723	0.0153632	1.07496e-05	0.998387	0.284618
12	rs117219697	57015664	G	A	64941	0.960538	-0.152068	0.0358734	1.0807e-05	0.978357	0.0394616
18	rs62097725	51235365	G	T	64941	0.700529	-0.0643167	0.0151664	1.08271e-05	0.99893	0.299471
4	rs6847519	56195871	T	A	64941	0.752698	-0.0684909	0.016164	1.09997e-05	0.992334	0.247302
13	rs482704	28177866	T	C	64941	0.596592	-0.0602012	0.0142061	1.10147e-05	0.998855	0.403408
4	rs55693542	56194256	C	T	64941	0.752724	-0.0684481	0.0161625	1.11202e-05	0.992562	0.247276
18	rs62097757	51269784	G	A	64941	0.699662	-0.0642462	0.0151731	1.1172e-05	0.997003	0.300338
4	rs55756622	56194450	G	C	64941	0.752728	-0.0684244	0.0161625	1.11977e-05	0.992576	0.247272
18	rs55965667	51271502	G	A	64941	0.700578	-0.0642139	0.0151681	1.12077e-05	0.998695	0.299422
13	rs11620544	30485143	C	T	64941	0.94665	0.132816	0.0313888	1.12665e-05	0.967437	0.0533497
13	rs9584406	97391760	C	T	64941	0.59984	0.0599976	0.0141793	1.12897e-05	0.998772	0.40016
9	rs17836313	27864895	G	A	64941	0.987148	0.265183	0.062769	1.14062e-05	0.970509	0.0128525
13	rs9512760	28173662	C	A	64941	0.403406	0.0600625	0.0142038	1.15014e-05	0.999046	0.403406
1	rs834984	100123338	G	A	64941	0.373864	-0.0605639	0.0143306	1.16063e-05	0.998054	0.373864
2	rs138287677	91701581	G	A	64941	0.943781	-0.166996	0.0395067	1.16416e-05	0.583186	0.0562185
2	rs74435195	164883396	A	C	64941	0.948096	-0.134703	0.0318892	1.16492e-05	0.952452	0.0519042
18	rs4940293	51366646	C	G	64941	0.760831	0.0690523	0.0163438	1.1658e-05	0.997029	0.239169
12	rs77477680	57053101	T	C	64941	0.960634	-0.15137	0.0358457	1.16742e-05	0.982656	0.0393655
1	rs189116927	246562695	G	A	64941	0.975086	-0.20361	0.0482296	1.16923e-05	0.852691	0.0249142
13	rs833093	28183004	C	T	64941	0.59679	-0.0600328	0.0142099	1.17178e-05	0.998317	0.40321
18	rs1442067	51245645	G	A	64941	0.30003	0.0639956	0.0151554	1.18029e-05	0.999331	0.30003
18	rs1865555	51223984	T	C	64941	0.300265	0.0639826	0.0151535	1.18171e-05	0.999569	0.300265
1	rs150872174	79340162	G	C	64941	0.940994	-0.124451	0.0294891	1.189e-05	0.990665	0.0590055
18	rs16957253	51289989	G	A	64941	0.696234	-0.0637575	0.0151053	1.19051e-05	0.998884	0.303766
13	rs1535786	28170189	C	G	64941	0.403389	0.0599684	0.0142063	1.19111e-05	0.998689	0.403389
18	rs2879573	51236982	A	G	64941	0.299942	0.0639456	0.0151525	1.19436e-05	0.99982	0.299942
18	rs1862930	51232734	C	T	64941	0.299942	0.0639431	0.0151524	1.19522e-05	0.999819	0.299942
18	rs3859347	51237095	G	A	64941	0.29994	0.0639429	0.0151525	1.19547e-05	0.999814	0.29994
1	rs6667376	79321034	T	C	64941	0.941024	-0.124528	0.029521	1.20019e-05	0.989136	0.0589762
18	rs4940285	51241100	A	G	64941	0.299911	0.0639286	0.0151525	1.20069e-05	0.999831	0.299911
18	rs6508207	50737950	T	C	64941	0.436303	-0.0590286	0.0139909	1.20122e-05	0.999407	0.436303
18	rs9957524	51233842	A	T	64941	0.299949	0.0639216	0.0151524	1.20326e-05	0.99979	0.299949
18	rs1159508	51245068	A	G	64941	0.299966	0.0639125	0.0151531	1.20782e-05	0.999652	0.299966
12	rs117046053	57019233	C	T	64941	0.960624	-0.151365	0.0359058	1.20845e-05	0.979584	0.039376
10	rs4748846	23508023	G	A	64941	0.526498	-0.0591968	0.0140344	1.20988e-05	0.984289	0.473502
18	rs11663824	50745236	C	A	64941	0.565454	-0.0589167	0.0139697	1.2151e-05	0.99924	0.434546
18	rs1596136	51221797	A	G	64941	0.299894	0.0639981	0.0151793	1.21713e-05	0.996491	0.299894
18	rs9950083	51238082	A	G	64941	0.299922	0.06388	0.0151523	1.21882e-05	0.99986	0.299922
18	rs12232599	51238794	G	C	64941	0.299922	0.06388	0.0151523	1.21882e-05	0.99986	0.299922
18	rs12232600	51238802	G	T	64941	0.299922	0.0638799	0.0151523	1.21889e-05	0.999858	0.299922
18	rs9950724	51238671	A	C	64941	0.299925	0.0638776	0.0151524	1.21999e-05	0.999844	0.299925
18	rs9953746	51290486	T	C	64941	0.697268	-0.0638221	0.0151405	1.22235e-05	0.996105	0.302732
8	rs7010391	3392354	G	A	64941	0.8252	-0.079053	0.0187534	1.22282e-05	0.950897	0.1748
4	rs6846997	186273488	A	G	64941	0.734777	0.0665588	0.0157886	1.22377e-05	0.990884	0.265223
6	rs1996971	25222058	A	C	64941	0.0221295	0.199804	0.047448	1.22693e-05	0.988321	0.0221295
18	rs1442069	51216328	A	G	64941	0.300304	0.0639855	0.0151847	1.23035e-05	0.995273	0.300304
15	rs1820892	30591063	A	G	64941	0.0583877	-0.157197	0.0373005	1.2335e-05	0.639226	0.0583877
18	rs2161812	51266819	T	C	64941	0.299905	0.0638404	0.0151528	1.23493e-05	0.999805	0.299905
18	rs8094102	51383287	G	T	64941	0.58351	0.0594072	0.0141009	1.2375e-05	0.997703	0.41649
18	rs6508249	51246176	G	A	64941	0.299914	0.0638221	0.015152	1.24077e-05	0.999881	0.299914
18	rs9965562	51218121	A	G	64941	0.299897	0.0639388	0.0151804	1.24176e-05	0.996321	0.299897
18	rs1036388	51269672	T	G	64941	0.299908	0.0638271	0.015155	1.24369e-05	0.999507	0.299908
18	rs62097726	51239114	A	G	64941	0.700425	-0.0638652	0.0151645	1.24448e-05	0.999001	0.299575
18	rs1118942	51253799	A	G	64941	0.299919	0.0638028	0.0151521	1.24836e-05	0.999874	0.299919
18	rs11082972	50733150	C	T	64941	0.436331	-0.0589069	0.0139891	1.24872e-05	0.999613	0.436331
18	rs7227709	51270474	A	G	64941	0.299924	0.0638115	0.0151548	1.24956e-05	0.999516	0.299924
18	rs4940287	51258025	C	A	64941	0.299923	0.0638003	0.0151522	1.24961e-05	0.999851	0.299923
18	rs4591216	51264512	C	T	64941	0.299913	0.0637994	0.0151527	1.2508e-05	0.999807	0.299913
18	rs6508251	51257557	A	C	64941	0.299922	0.0637971	0.0151522	1.25087e-05	0.999854	0.299922
18	rs6508250	51255748	T	C	64941	0.299918	0.0637955	0.0151521	1.25135e-05	0.999875	0.299918
18	rs1814109	51248041	C	T	64941	0.299918	0.0637922	0.0151521	1.25254e-05	0.999877	0.299918
18	rs1364460	51248695	T	A	64941	0.299918	0.0637922	0.0151521	1.25254e-05	0.999877	0.299918
18	rs9953669	51239192	G	A	64941	0.299933	0.0637846	0.0151539	1.2585e-05	0.99966	0.299933
18	rs9953751	51290495	T	G	64941	0.697294	-0.0637275	0.0151404	1.25915e-05	0.99613	0.302706
18	rs6508253	51260259	C	T	64941	0.299917	0.063773	0.0151524	1.26069e-05	0.999848	0.299917
18	rs2879600	51262207	C	T	64941	0.29992	0.0637696	0.0151525	1.26213e-05	0.999834	0.29992
18	rs6417124	51247480	A	G	64941	0.299895	0.0637652	0.0151528	1.26446e-05	0.999811	0.299895
1	rs78817139	79350201	A	G	64941	0.938093	-0.120793	0.0287185	1.27063e-05	0.998973	0.061907
13	rs11842793	97396264	T	C	64941	0.599565	0.0596323	0.0141799	1.27723e-05	0.998513	0.400435
18	rs11083015	51300193	G	A	64941	0.723398	0.0656993	0.0156226	1.27957e-05	0.994725	0.276602
18	rs2113463	51246760	C	T	64941	0.299957	0.0637047	0.0151523	1.28783e-05	0.999823	0.299957
18	rs16957143	51210479	A	G	64941	0.675627	-0.0640023	0.0152259	1.29119e-05	0.948592	0.324373
1	rs7540358	100144363	C	T	64941	0.311445	-0.0629675	0.0149808	1.29301e-05	0.997738	0.311445
18	rs62100767	50738039	A	G	64941	0.56656	-0.0587409	0.0139721	1.29445e-05	0.999268	0.43344
18	rs62100771	50741130	A	G	64941	0.566389	-0.0587279	0.0139699	1.29612e-05	0.999422	0.433611
16	rs2283498	4126201	C	T	64941	0.726638	-0.0660036	0.0157022	1.29618e-05	0.986615	0.273362
7	rs7810801	82515942	C	T	64941	0.600497	-0.0597469	0.0142147	1.29737e-05	0.995336	0.399503
1	rs1338577	100143653	T	G	64941	0.311437	-0.0629576	0.0149811	1.29753e-05	0.997677	0.311437
6	rs76632250	4466312	A	T	64941	0.978587	-0.201817	0.0480528	1.29789e-05	0.988521	0.021413
18	rs1866985	51223800	T	A	64941	0.300129	0.0636843	0.0151542	1.29902e-05	0.999509	0.300129
18	rs62100766	50737358	G	T	64941	0.566545	-0.0587193	0.013972	1.30391e-05	0.999442	0.433455
18	rs9653024	51331059	G	A	64941	0.688645	-0.0630917	0.0150172	1.30825e-05	0.998452	0.311355
13	rs2147154	28151181	G	A	64941	0.402076	0.0597266	0.0142157	1.30844e-05	0.998202	0.402076
9	rs17773550	105832231	C	G	64941	0.96784	-0.171229	0.0407886	1.31127e-05	0.925597	0.0321597
19	rs56170931	366774	T	G	64941	0.972856	-0.187923	0.0447584	1.31388e-05	0.907036	0.0271443
18	rs16957283	51325784	T	C	64941	0.688568	-0.0630792	0.0150181	1.31487e-05	0.998187	0.311432
8	rs11991845	34546960	T	A	64941	0.976186	0.191092	0.0455081	1.31783e-05	0.995842	0.0238137
18	rs12955298	51309460	C	A	64941	0.722974	0.0655508	0.0156141	1.32406e-05	0.995768	0.277026
20	rs142284057	325442	T	G	64941	0.984629	-0.257822	0.0614702	1.32509e-05	0.840579	0.0153707
18	rs16957251	51289119	G	A	64941	0.696235	-0.0634147	0.0151057	1.3266e-05	0.998881	0.303765
13	rs116872226	30487882	C	T	64941	0.946224	0.130757	0.031159	1.33066e-05	0.974923	0.0537759
12	rs11180918	41829372	C	T	64941	0.870949	0.0872693	0.0207951	1.33464e-05	0.991222	0.129051
18	rs9961354	51220208	T	C	64941	0.300359	0.0636731	0.0151758	1.34073e-05	0.996269	0.300359
18	rs1424509	51274127	G	C	64941	0.299978	0.063583	0.0151544	1.34141e-05	0.999468	0.299978
18	rs6508255	51272588	C	T	64941	0.299998	0.0635784	0.0151545	1.34347e-05	0.999449	0.299998
12	rs117852993	57073096	C	T	64941	0.96065	-0.150401	0.0358712	1.34683e-05	0.981336	0.0393502
18	rs7227196	51270137	A	G	64941	0.299965	0.0635642	0.0151547	1.34988e-05	0.999456	0.299965
18	rs7243008	50750684	A	T	64941	0.523294	-0.058255	0.0138908	1.35522e-05	0.996812	0.476706
18	rs2298606	50731823	T	C	64941	0.436395	-0.058668	0.0139902	1.35642e-05	0.999455	0.436395
1	rs834980	100130710	A	G	64941	0.373851	-0.0600875	0.0143321	1.36176e-05	0.997812	0.373851
1	rs16855673	205468167	C	T	64941	0.787025	-0.071116	0.016965	1.36179e-05	0.994829	0.212975
1	rs2996692	79337233	G	A	64941	0.93799	-0.120284	0.0287014	1.3656e-05	0.998744	0.0620097
18	rs9966086	51218671	A	G	64941	0.300356	0.0636175	0.0151768	1.36605e-05	0.996138	0.300356
6	rs75306503	4469315	C	T	64941	0.978672	-0.202053	0.0482383	1.36935e-05	0.984728	0.0213277
18	rs8084077	51278930	C	T	64941	0.299983	0.0635407	0.0151605	1.37026e-05	0.999337	0.299983
13	rs9582060	97395136	A	G	64941	0.59979	0.0594218	0.0141805	1.37138e-05	0.998365	0.40021
18	rs7240325	51274758	C	A	64941	0.299954	0.0635167	0.0151556	1.37155e-05	0.999386	0.299954
6	rs847771	40048586	T	C	64941	0.759834	0.0682953	0.0162893	1.37479e-05	0.99482	0.240166
18	rs9965865	51218307	C	G	64941	0.300343	0.0635941	0.0151765	1.37544e-05	0.996191	0.300343
13	rs12854100	55682987	G	C	64941	0.717254	0.0645674	0.0154087	1.37674e-05	0.996589	0.282746
13	rs4771258	97387452	G	T	64941	0.601685	0.0594559	0.0141917	1.37763e-05	0.999473	0.398315
18	rs1036387	51269566	A	C	64941	0.299951	0.0634915	0.0151554	1.38206e-05	0.99945	0.299951
18	rs920079	51213366	T	C	64941	0.300083	0.0636459	0.0151936	1.38414e-05	0.994319	0.300083
9	rs10968156	27866064	A	C	64941	0.987092	0.263042	0.0628648	1.38482e-05	0.963386	0.012908
13	rs12868747	55879808	G	A	64941	0.715891	0.0644395	0.0153845	1.38625e-05	0.99671	0.284109
18	rs9946269	51212398	A	T	64941	0.300088	0.0636268	0.0151939	1.39294e-05	0.994291	0.300088
13	rs12865343	55692494	C	T	64941	0.716434	0.0644738	0.0153952	1.39322e-05	0.997572	0.283566
18	rs6508247	51211431	G	A	64941	0.300088	0.0636257	0.0151942	1.39404e-05	0.994252	0.300088
1	rs114159462	79326954	C	A	64941	0.937948	-0.120077	0.0286956	1.4075e-05	0.998667	0.0620516
1	rs76739473	79327502	G	A	64941	0.937948	-0.120076	0.0286955	1.40758e-05	0.998673	0.0620518
18	rs8097027	24239857	G	A	64941	0.385065	0.0600424	0.0143537	1.41985e-05	0.990438	0.385065
18	rs62099232	50727691	C	T	64941	0.566362	-0.058447	0.0139681	1.42182e-05	0.999668	0.433638
18	rs9946693	51296981	G	A	64941	0.696337	-0.0632154	0.0151114	1.42269e-05	0.998296	0.303663
18	rs16957287	51325891	T	C	64941	0.688806	-0.0628301	0.01502	1.42601e-05	0.998207	0.311194
18	rs8098550	24239885	A	G	64941	0.385087	0.0600277	0.0143536	1.42662e-05	0.990405	0.385087
18	rs3794923	50727518	C	T	64941	0.566357	-0.0584352	0.0139681	1.4275e-05	0.999678	0.433643
12	rs144501689	12429035	G	A	64941	0.985121	-0.240636	0.0575944	1.42883e-05	0.984923	0.0148792
4	rs71596009	81392200	C	T	64941	0.983371	0.249357	0.0596778	1.42982e-05	0.839059	0.0166287
18	rs1372479	51254755	T	C	64941	0.300276	0.0633737	0.0151535	1.43015e-05	0.999038	0.300276
18	rs62099561	51284729	G	A	64941	0.696451	-0.0631848	0.0151085	1.43111e-05	0.998814	0.303549
6	rs847744	40085245	T	C	64941	0.759952	0.06819	0.0162991	1.43479e-05	0.9935	0.240048
18	rs12953529	50968973	A	G	64941	0.527006	-0.0582575	0.0139323	1.43513e-05	0.994287	0.472994
13	rs59790854	55718512	A	C	64941	0.717369	0.0643938	0.0154022	1.43993e-05	0.997817	0.282631
18	rs8084493	51215859	T	A	64941	0.300066	0.0635183	0.0151938	1.44048e-05	0.994337	0.300066
18	rs17488316	50749935	A	T	64941	0.523129	-0.0580755	0.013891	1.44081e-05	0.996785	0.476871
1	rs834982	100128783	A	G	64941	0.373605	-0.0599192	0.0143328	1.44097e-05	0.99786	0.373605
18	rs10502966	50748499	A	G	64941	0.548758	-0.0582701	0.0139402	1.44794e-05	0.996839	0.451242
1	rs76030834	79322503	C	T	64941	0.937956	-0.119941	0.0287045	1.44817e-05	0.998246	0.0620437
6	rs138489966	27930081	A	C	64941	0.96873	-0.168111	0.0402442	1.44869e-05	0.98604	0.0312703
1	rs6675250	79318199	T	G	64941	0.937961	-0.119908	0.0287068	1.45847e-05	0.998174	0.0620389
1	rs76220465	79317285	G	T	64941	0.937962	-0.119909	0.0287072	1.45852e-05	0.998158	0.0620383
1	rs76246671	79317421	A	T	64941	0.937962	-0.119904	0.028707	1.45965e-05	0.998167	0.0620385
1	rs79847682	79317504	C	A	64941	0.937962	-0.119904	0.028707	1.45965e-05	0.998167	0.0620385
6	rs6914933	4467629	T	G	64941	0.978505	-0.200814	0.0480981	1.46035e-05	0.983063	0.021495
1	rs142366893	79317106	C	T	64941	0.937962	-0.119901	0.0287073	1.46041e-05	0.998151	0.0620383
6	rs140547816	4468646	A	G	64941	0.978908	-0.202427	0.0484869	1.46191e-05	0.984528	0.0210917
18	rs4100584	51204955	A	G	64941	0.299524	0.0635315	0.0152091	1.46358e-05	0.993312	0.299524
1	rs116458158	79351021	A	T	64941	0.93812	-0.119978	0.0287297	1.46474e-05	0.998508	0.06188
6	rs55918955	27792644	C	T	64941	0.968869	-0.168157	0.0402814	1.46663e-05	0.987107	0.031131
1	rs79271452	79310632	A	T	64941	0.937962	-0.119877	0.0287081	1.46715e-05	0.998113	0.0620376
4	rs6810778	186280522	G	A	64941	0.735667	0.0659714	0.0157935	1.46782e-05	0.993001	0.264333
1	rs78583931	79310781	G	A	64941	0.937962	-0.119872	0.028708	1.46831e-05	0.998115	0.0620378
1	rs75393708	79308769	G	A	64941	0.937965	-0.119871	0.0287105	1.47088e-05	0.997984	0.0620355
3	rs36209	134630495	T	G	64941	0.0240859	0.203044	0.0486565	1.47256e-05	0.862252	0.0240859
6	rs146918648	28548674	G	A	64941	0.963111	-0.155642	0.0372925	1.47642e-05	0.977027	0.0368888
18	rs16957119	51201794	C	T	64941	0.701036	-0.0635605	0.015224	1.47878e-05	0.992396	0.298964
1	rs17102312	79307988	A	G	64941	0.937964	-0.119843	0.0287117	1.47895e-05	0.99789	0.0620361
13	rs9569213	55726850	C	G	64941	0.717376	0.0642936	0.0154011	1.48259e-05	0.997972	0.282624
9	rs10120361	9079110	C	G	64941	0.980142	-0.210848	0.0505635	1.49421e-05	0.968128	0.0198581
5	rs7727787	180653039	G	A	64941	0.876961	-0.0891948	0.0213749	1.49677e-05	0.97704	0.123039
3	rs146621671	29565299	C	T	64941	0.968055	-0.164587	0.039447	1.4972e-05	0.993375	0.0319453
18	rs9959921	51206230	C	T	64941	0.447469	0.059741	0.0143196	1.50257e-05	0.949032	0.447469
6	rs149915815	27992219	A	G	64941	0.969898	-0.172219	0.0413138	1.50949e-05	0.973213	0.0301023
3	rs116537659	44982147	G	A	64941	0.972995	-0.180609	0.0433369	1.51514e-05	0.982406	0.0270054
5	rs11744527	180656074	G	A	64941	0.877005	-0.0891396	0.021376	1.51687e-05	0.977239	0.122995
5	rs17713876	180646568	T	C	64941	0.876718	-0.0889869	0.0213451	1.52447e-05	0.978467	0.123282
18	rs1073134	51203324	T	C	64941	0.700757	-0.0634741	0.0152293	1.52937e-05	0.991439	0.299243
5	rs10064575	2132966	C	G	64941	0.863291	-0.113708	0.0272901	1.53548e-05	0.551262	0.136709
18	rs4491606	51333959	C	G	64941	0.688658	-0.0625774	0.0150162	1.53573e-05	0.998475	0.311342
13	rs1924587	97397379	G	C	64941	0.60132	0.0591245	0.0141918	1.53794e-05	0.998926	0.39868
2	rs75014295	164738239	C	T	64941	0.946994	-0.129969	0.031201	1.53924e-05	0.973927	0.0530059
13	rs1932500	97401331	G	A	64941	0.601733	0.0591211	0.0141919	1.54018e-05	0.999352	0.398267
12	rs829828	26058162	A	G	64941	0.966763	0.163076	0.0391613	1.54111e-05	0.98758	0.0332366
6	rs140849647	29360015	C	T	64941	0.97776	-0.209029	0.0502087	1.54212e-05	0.873018	0.02224
1	rs115091358	79342368	C	G	64941	0.938035	-0.1196	0.0287147	1.54239e-05	0.998587	0.0619651
18	rs16957117	51201712	A	C	64941	0.701051	-0.0634174	0.0152249	1.54758e-05	0.992479	0.298949
6	rs139582054	28534833	C	G	64941	0.963168	-0.155442	0.0373369	1.55019e-05	0.97638	0.0368319
1	rs114316285	79345581	G	A	64941	0.937989	-0.119507	0.0287012	1.55178e-05	0.998914	0.0620112
18	rs17487256	50718314	C	T	64941	0.566338	-0.0581934	0.0139699	1.55258e-05	0.999552	0.433662
6	rs76039293	27759050	A	C	64941	0.968737	-0.167112	0.0401534	1.55729e-05	0.989116	0.0312634
6	rs146734470	27765899	A	G	64941	0.968734	-0.167088	0.0401489	1.55828e-05	0.989281	0.0312658
4	rs10030392	186271154	G	A	64941	0.792736	0.0716416	0.0172073	1.56048e-05	0.988435	0.207264
6	rs9504087	4421016	A	G	64941	0.978107	-0.198638	0.047758	1.57235e-05	0.981144	0.0218926
18	rs9304452	51276222	G	A	64941	0.546182	0.0582405	0.0139961	1.57266e-05	0.991705	0.453818
6	rs73347498	4421340	T	C	64941	0.978107	-0.198628	0.0477578	1.57378e-05	0.98115	0.0218928
19	rs2278286	366840	C	A	64941	0.973454	-0.187387	0.0450533	1.58257e-05	0.916343	0.0265465
18	rs17486305	50697120	C	T	64941	0.566445	-0.0581557	0.0139794	1.59352e-05	0.998013	0.433555
9	rs17780713	27865212	A	G	64941	0.986886	0.2577	0.0620234	1.59454e-05	0.972874	0.0131137
18	rs1442077	51199606	T	G	64941	0.299077	0.063343	0.0152306	1.59509e-05	0.991677	0.299077
4	rs10023947	186269135	C	T	64941	0.792756	0.0715775	0.0172132	1.59869e-05	0.988024	0.207244
1	rs141839472	79343599	C	A	64941	0.938004	-0.119296	0.0287022	1.60748e-05	0.999015	0.0619955
1	rs6682731	79348261	A	G	64941	0.937473	-0.118821	0.0285884	1.60756e-05	0.99891	0.0625268
3	rs74760367	29570041	C	A	64941	0.967847	-0.163417	0.0393187	1.61405e-05	0.993906	0.032153
8	rs140607314	131799038	C	A	64941	0.975567	-0.189713	0.0456512	1.61696e-05	0.965624	0.0244328
1	rs146320906	79345718	C	T	64941	0.938001	-0.119245	0.0287013	1.62002e-05	0.99906	0.0619987
3	rs115418997	29570209	T	A	64941	0.967839	-0.163378	0.039318	1.62094e-05	0.993706	0.0321613
1	rs114875021	79345641	G	A	64941	0.938001	-0.119241	0.0287014	1.62113e-05	0.999055	0.0619986
1	rs149650176	79345340	T	C	64941	0.938001	-0.119233	0.0287013	1.62318e-05	0.999051	0.0619991
1	rs79982895	79348695	C	A	64941	0.937994	-0.119213	0.0286981	1.62495e-05	0.999184	0.0620057
6	rs2328871	25220580	C	T	64941	0.0221796	0.196889	0.0474241	1.62626e-05	0.987363	0.0221796
18	rs55947030	51335692	G	C	64941	0.688694	-0.0623917	0.0150159	1.62681e-05	0.998539	0.311306
1	rs79338647	79348441	C	T	64941	0.937993	-0.119198	0.0286976	1.62843e-05	0.999198	0.0620067
1	rs115444625	79345990	C	T	64941	0.937993	-0.119181	0.0286992	1.63459e-05	0.999024	0.062007
2	rs72844424	85731952	C	A	64941	0.92647	0.114347	0.0275324	1.63716e-05	0.935482	0.0735304
18	rs1424512	51329489	G	A	64941	0.688615	-0.0623787	0.0150177	1.63739e-05	0.998217	0.311385
1	rs7543883	79347715	G	T	64941	0.937992	-0.119168	0.0286985	1.63744e-05	0.999086	0.0620079
12	rs74603562	15157476	A	G	64941	0.945047	-0.128941	0.0310564	1.64189e-05	0.966143	0.0549534
13	rs7333964	55798034	C	T	64941	0.715882	0.0637947	0.0153615	1.64248e-05	0.99905	0.284118
1	rs77828518	79346722	C	T	64941	0.937992	-0.11915	0.0286991	1.64281e-05	0.999026	0.0620081
18	rs72932223	51301634	C	T	64941	0.697558	-0.0628399	0.0151341	1.64635e-05	0.997873	0.302442
13	rs9582062	97409884	C	T	64941	0.601941	0.0589454	0.014199	1.64819e-05	0.998569	0.398059
12	rs147304335	57095615	G	A	64941	0.960786	-0.149099	0.0359275	1.64859e-05	0.981431	0.0392135
13	rs34438449	55792994	G	A	64941	0.715695	0.0638012	0.0153662	1.64916e-05	0.998196	0.284305
18	rs59907820	51335450	C	G	64941	0.688696	-0.0623288	0.0150159	1.65912e-05	0.998542	0.311304
1	rs7549910	79349463	G	A	64941	0.93754	-0.118691	0.0286073	1.66366e-05	0.998569	0.0624603
4	rs1288573	186246958	A	G	64941	0.731939	0.0655224	0.0157852	1.66489e-05	0.985442	0.268061
7	rs10243348	82508211	A	G	64941	0.600737	-0.058881	0.0141879	1.66624e-05	0.998686	0.399263
18	rs56128154	51190810	A	G	64941	0.703198	-0.0634129	0.0152829	1.6689e-05	0.988067	0.296802
13	rs34412078	55686773	A	T	64941	0.718116	0.0640163	0.015431	1.67766e-05	0.994424	0.281884
13	rs9569278	55873479	A	G	64941	0.714817	0.0636663	0.0153522	1.68658e-05	0.998272	0.285183
4	rs11941894	186275277	A	G	64941	0.720005	0.0642316	0.0154856	1.68858e-05	0.992346	0.279995
18	rs12456337	24241627	C	T	64941	0.410759	0.0587099	0.0141606	1.69196e-05	0.997301	0.410759
13	rs7995081	55883682	A	C	64941	0.714688	0.0636369	0.0153482	1.69307e-05	0.998492	0.285312
18	rs2028522	51196523	T	C	64941	0.296921	0.0633384	0.0152765	1.69339e-05	0.98902	0.296921
13	rs7316934	55885441	C	G	64941	0.714688	0.0636349	0.0153482	1.69413e-05	0.998491	0.285312
13	rs3861155	55896359	A	C	64941	0.714692	0.0636421	0.0153504	1.69521e-05	0.998195	0.285308
18	rs1442075	51201891	T	A	64941	0.299644	0.0630571	0.0152096	1.69555e-05	0.992991	0.299644
3	rs12491724	29573988	T	C	64941	0.96784	-0.162939	0.0393048	1.69721e-05	0.994413	0.0321598
13	rs73208903	60260551	A	G	64941	0.959878	0.152419	0.0367879	1.70033e-05	0.924472	0.0401223
13	rs7334937	55884494	T	C	64941	0.714683	0.0636059	0.0153479	1.70856e-05	0.998511	0.285317
13	rs9569282	55887762	A	G	64941	0.714685	0.0636042	0.015348	1.70968e-05	0.998497	0.285315
13	rs9569280	55883759	G	T	64941	0.714683	0.0636006	0.0153479	1.71134e-05	0.99851	0.285317
13	rs9634864	55826907	A	T	64941	0.714666	0.0636162	0.0153517	1.71181e-05	0.998206	0.285334
18	rs12961506	51210146	A	G	64941	0.325152	0.0630211	0.0152127	1.7199e-05	0.948694	0.325152
18	rs1039192	51430331	G	A	64941	0.493786	-0.0577135	0.0139313	1.72072e-05	0.995732	0.493786
6	rs2328872	25220759	G	T	64941	0.0221839	0.19617	0.0473944	1.72517e-05	0.988328	0.0221839
18	rs3859344	51206004	G	T	64941	0.324545	0.063051	0.0152227	1.72615e-05	0.948708	0.324545
6	rs6915234	4419061	C	T	64941	0.978108	-0.197695	0.0477665	1.73158e-05	0.98085	0.0218922
13	rs9569290	55897832	A	G	64941	0.714952	0.0636181	0.0153621	1.73294e-05	0.997254	0.285048
6	rs1100103	40040424	T	C	64941	0.758999	0.0673236	0.0162535	1.74362e-05	0.996734	0.241001
13	rs1924582	97386072	G	A	64941	0.601922	0.0587447	0.0141968	1.75571e-05	0.999073	0.398078
4	rs41475546	63035387	G	A	64941	0.885843	-0.0904801	0.0218659	1.76067e-05	0.996391	0.114157
6	rs144524716	27715530	G	A	64941	0.96871	-0.165524	0.0400287	1.76535e-05	0.994553	0.03129
7	rs2371365	82506898	T	C	64941	0.600676	-0.0587015	0.0141871	1.76597e-05	0.99878	0.399324
4	rs6811567	186271884	T	C	64941	0.719975	0.0640868	0.0154874	1.76778e-05	0.992236	0.280025
6	rs9504114	4471635	C	T	64941	0.977757	-0.19465	0.0470744	1.76822e-05	0.979632	0.0222435
13	rs1595222	55868550	C	G	64941	0.714879	0.0635024	0.0153509	1.77026e-05	0.998703	0.285121
13	rs9634694	55828740	G	T	64941	0.714919	0.0635055	0.0153521	1.77149e-05	0.998556	0.285081
13	rs7331970	55876513	A	T	64941	0.714808	0.0634919	0.015351	1.77601e-05	0.998426	0.285192
15	rs4777085	69032326	A	G	64941	0.0563991	0.126644	0.0306367	1.78723e-05	0.972289	0.0563991
18	rs1595000	51202554	A	G	64941	0.299637	0.0628858	0.0152096	1.78733e-05	0.992987	0.299637
7	rs6972961	82505873	A	G	64941	0.600646	-0.0586337	0.0141844	1.79912e-05	0.999088	0.399354
18	rs1367633	50747956	G	A	64941	0.520087	-0.0573685	0.0138796	1.80133e-05	0.997013	0.479913
13	rs9569264	55858515	T	C	64941	0.714889	0.0634228	0.0153491	1.80964e-05	0.998921	0.285111
18	rs17410557	50776391	T	C	64941	0.577168	-0.0580381	0.0140418	1.81011e-05	0.995753	0.422832
18	rs10048336	51200498	A	G	64941	0.299651	0.0628348	0.015212	1.82096e-05	0.992732	0.299651
18	rs2059330	51310862	C	T	64941	0.731019	0.0650746	0.0157573	1.82604e-05	0.994872	0.268981
8	rs146526855	125610729	A	T	64941	0.98101	-0.231547	0.0561055	1.83212e-05	0.814827	0.0189904
13	rs9563312	55853933	G	A	64941	0.714897	0.063375	0.0153481	1.83384e-05	0.999064	0.285103
13	rs7322089	55694436	C	A	64941	0.716825	0.0635651	0.0153944	1.83591e-05	0.997423	0.283175
1	rs7535891	79347517	T	C	64941	0.937513	-0.11805	0.0286049	1.84475e-05	0.998311	0.0624868
9	rs73641218	9109562	G	A	64941	0.980502	-0.209109	0.0506944	1.84768e-05	0.980745	0.019498
6	rs847769	40050171	T	C	64941	0.759607	0.0671952	0.0162713	1.84843e-05	0.996083	0.240393
1	rs7543576	79347398	G	T	64941	0.937512	-0.118027	0.028605	1.85168e-05	0.998284	0.0624881
13	rs61959460	55802776	A	T	64941	0.71587	0.0634035	0.0153636	1.85516e-05	0.998757	0.28413
18	rs57295061	51446724	T	C	64941	0.412266	-0.0584436	0.0141642	1.86101e-05	0.992257	0.412266
6	rs148393755	27701021	G	C	64941	0.968711	-0.165048	0.0400265	1.86446e-05	0.994699	0.031289
13	rs9563319	55885038	T	C	64941	0.714625	0.063312	0.0153464	1.86494e-05	0.998587	0.285375
13	rs12561141	55837514	G	A	64941	0.714918	0.0633204	0.0153494	1.86753e-05	0.998979	0.285081
13	rs61959501	55837265	T	A	64941	0.714919	0.0633192	0.0153494	1.86824e-05	0.998978	0.285081
13	rs9563285	55680675	C	G	64941	0.716738	0.0635209	0.0153987	1.87077e-05	0.996428	0.283262
13	rs2182043	55700841	A	G	64941	0.716775	0.0634844	0.0153898	1.87078e-05	0.997855	0.283225
13	rs9569241	55803552	G	A	64941	0.715854	0.0633746	0.0153636	1.87162e-05	0.998692	0.284146
13	rs55723839	60270647	C	T	64941	0.95989	0.151458	0.036742	1.87567e-05	0.926943	0.0401098
7	rs4397344	82507230	T	C	64941	0.600636	-0.0585202	0.0141879	1.87646e-05	0.99871	0.399364
13	rs9300365	97406602	C	T	64941	0.601825	0.0585038	0.014193	1.89061e-05	0.999045	0.398175
6	rs1100100	40060359	C	T	64941	0.760018	0.0671347	0.0162786	1.89749e-05	0.996274	0.239982
13	rs4580037	55702646	A	C	64941	0.716791	0.0634329	0.0153898	1.90021e-05	0.997856	0.283209
1	rs77526639	79325132	G	A	64941	0.937827	-0.118169	0.0286782	1.90071e-05	0.998442	0.0621734
1	rs6675418	79346012	A	T	64941	0.937505	-0.117864	0.0286045	1.90083e-05	0.998186	0.0624946
1	rs145839451	79344929	T	C	64941	0.937511	-0.117869	0.0286078	1.9033e-05	0.99808	0.0624887
13	rs9563286	55684389	T	C	64941	0.716727	0.0634506	0.0153962	1.90518e-05	0.996751	0.283273
1	rs113649357	79345474	A	G	64941	0.937511	-0.117862	0.0286079	1.90571e-05	0.99808	0.0624891
9	rs72716586	27868872	C	T	64941	0.987026	0.260563	0.0632981	1.90843e-05	0.944813	0.0129738
5	rs10455028	117189130	C	G	64941	0.734496	-0.0647923	0.0157269	1.90887e-05	0.991224	0.265504
4	rs41452945	63034539	A	G	64941	0.885887	-0.0901083	0.0218687	1.91091e-05	0.996343	0.114113
4	rs61686752	63024031	A	T	64941	0.885899	-0.0901013	0.0218671	1.9111e-05	0.996276	0.1141
13	rs2050723	55679486	C	T	64941	0.71684	0.0634575	0.015401	1.91269e-05	0.996187	0.28316
12	rs2467456	23015226	T	C	64941	0.319456	-0.0621241	0.0150817	1.9131e-05	0.976689	0.319456
18	rs1370901	24240801	T	C	64941	0.382624	0.0590145	0.0143257	1.91345e-05	0.996962	0.382624
6	rs2150235	4443393	T	G	64941	0.978068	-0.196115	0.0476315	1.91493e-05	0.984592	0.0219324
4	rs35398119	63027175	T	C	64941	0.885892	-0.0900875	0.0218669	1.91629e-05	0.996241	0.114108
13	rs12874052	55681835	T	C	64941	0.716732	0.063435	0.0153975	1.91732e-05	0.996565	0.283268
4	rs76702452	63025195	A	G	64941	0.885894	-0.0900843	0.0218669	1.91766e-05	0.996241	0.114106
13	rs7999502	55683634	G	A	64941	0.716746	0.0634283	0.0153961	1.91772e-05	0.996807	0.283254
1	rs111519973	79345290	T	G	64941	0.93751	-0.117823	0.0286077	1.91783e-05	0.998069	0.0624901
4	rs56229538	63048325	C	T	64941	0.885919	-0.0901044	0.021872	1.91793e-05	0.996346	0.114081
4	rs144294423	63033707	C	A	64941	0.885895	-0.0900994	0.0218709	1.91809e-05	0.996188	0.114105
4	rs78204116	63029253	A	T	64941	0.885893	-0.0900901	0.0218688	1.91848e-05	0.99616	0.114107
4	rs78772159	63027486	T	C	64941	0.885893	-0.0900817	0.0218671	1.91909e-05	0.996232	0.114107
4	rs115116331	63032532	C	G	64941	0.885894	-0.0900948	0.0218705	1.91945e-05	0.99616	0.114106
1	rs112580222	79345252	T	A	64941	0.93751	-0.117817	0.0286077	1.91965e-05	0.998068	0.0624904
4	rs6841161	63031859	G	T	64941	0.885894	-0.09009	0.0218703	1.92094e-05	0.996149	0.114106
4	rs2193117	63030804	C	T	64941	0.885893	-0.0900862	0.0218696	1.92147e-05	0.996151	0.114107
4	rs74630864	63026533	A	G	64941	0.885893	-0.0900706	0.0218666	1.92277e-05	0.99626	0.114107
4	rs76824002	63048744	A	G	64941	0.885925	-0.0900903	0.0218722	1.92405e-05	0.996383	0.114075
4	rs78593313	63047641	C	A	64941	0.885918	-0.0900853	0.0218719	1.92554e-05	0.99635	0.114082
4	rs60951852	63047208	G	A	64941	0.885916	-0.0900828	0.0218719	1.92655e-05	0.996344	0.114084
6	rs847751	40035607	A	G	64941	0.75874	0.0669268	0.0162419	1.92751e-05	0.996709	0.24126
4	rs56788324	63045298	G	T	64941	0.885911	-0.0900733	0.0218717	1.93017e-05	0.996343	0.114089
13	rs7994312	55683462	A	C	64941	0.716756	0.0634068	0.0153961	1.9304e-05	0.996815	0.283244
4	rs55738302	63046078	G	A	64941	0.885913	-0.0900727	0.0218718	1.93064e-05	0.99634	0.114087
6	rs115724600	27683371	G	T	64941	0.968727	-0.164849	0.0400526	1.93215e-05	0.994419	0.031273
13	rs2182044	55701410	G	A	64941	0.716853	0.0633784	0.0153911	1.93485e-05	0.997851	0.283147
4	rs142609288	63044591	G	T	64941	0.885909	-0.0900581	0.0218717	1.93632e-05	0.996346	0.114091
4	rs34093205	63043819	T	C	64941	0.885907	-0.0900508	0.0218714	1.93895e-05	0.996353	0.114093
4	rs74537807	63043437	G	A	64941	0.885905	-0.0900493	0.0218713	1.93936e-05	0.996356	0.114095
4	rs60732848	63041569	T	C	64941	0.885901	-0.0900461	0.0218709	1.94e-05	0.996377	0.114099
4	rs79398017	63041389	G	A	64941	0.885902	-0.090046	0.0218709	1.94006e-05	0.996378	0.114098
4	rs58742242	63041642	T	C	64941	0.885902	-0.0900454	0.021871	1.9404e-05	0.996374	0.114098
4	rs56287213	63042237	G	A	64941	0.885902	-0.0900449	0.021871	1.94066e-05	0.996371	0.114098
4	rs78137573	63040390	C	A	64941	0.885883	-0.0900415	0.0218704	1.94097e-05	0.996246	0.114117
4	rs58102352	63042839	A	C	64941	0.885904	-0.0900441	0.0218712	1.94129e-05	0.996365	0.114096
4	rs60443220	63041461	G	A	64941	0.885902	-0.0900428	0.0218709	1.9414e-05	0.996375	0.114098
1	rs113476569	79342192	T	G	64941	0.937526	-0.117785	0.0286168	1.94146e-05	0.99757	0.0624735
4	rs78009780	63044140	A	G	64941	0.885908	-0.0900428	0.0218716	1.94243e-05	0.996349	0.114092
4	rs80041790	63043046	T	C	64941	0.885904	-0.0900398	0.0218712	1.94312e-05	0.996362	0.114096
4	rs76990518	63043978	T	C	64941	0.885907	-0.0900406	0.0218715	1.94323e-05	0.996351	0.114093
4	rs74765222	63043042	A	G	64941	0.885904	-0.0900394	0.0218712	1.94331e-05	0.996362	0.114096
23	X:379072:G:A	379072	G	A	55141	0.614576	-0.0969252	0.0235709	1.94378e-05	0.402657	0.444643
9	rs73641217	9108969	A	G	64941	0.980466	-0.208463	0.0506737	1.94575e-05	0.979911	0.0195341
18	rs62100772	50741297	G	A	64941	0.53745	-0.0571592	0.0138838	1.9464e-05	0.999338	0.46255
1	rs6666945	79323545	C	T	64941	0.937833	-0.118049	0.0286856	1.94779e-05	0.998095	0.0621669
4	rs79579329	63040211	C	T	64941	0.885885	-0.0900157	0.0218702	1.95145e-05	0.996267	0.114115
13	rs1338786	55790641	G	A	64941	0.715808	0.0632475	0.0153669	1.95285e-05	0.998086	0.284192
4	rs17292212	63049607	G	C	64941	0.885937	-0.0900147	0.0218716	1.95417e-05	0.996565	0.114063
11	rs16913337	89204459	T	C	64941	0.977972	-0.204364	0.049696	1.9557e-05	0.911446	0.022028
13	rs11148329	55694391	T	G	64941	0.716829	0.063347	0.0153934	1.95888e-05	0.997519	0.283171
13	rs34743478	55693963	C	T	64941	0.716829	0.0633448	0.0153934	1.96018e-05	0.997517	0.283171
12	rs12817366	43065839	C	T	64941	0.61219	-0.0587795	0.014284	1.96057e-05	0.985626	0.38781
6	rs78498632	4470608	A	G	64941	0.978754	-0.198907	0.0483689	1.96238e-05	0.982816	0.0212459
13	rs1338787	55790731	A	G	64941	0.715934	0.0632154	0.0153636	1.96392e-05	0.998741	0.284066
13	rs34284484	55710231	T	G	64941	0.716864	0.0633152	0.0153894	1.96786e-05	0.99803	0.283136
4	rs74489671	63042959	C	T	64941	0.885894	-0.0899801	0.0218713	1.96812e-05	0.996269	0.114106
13	rs34536535	55693910	A	G	64941	0.716812	0.0633302	0.0153938	1.96988e-05	0.99743	0.283188
13	rs12872043	55688246	G	A	64941	0.716758	0.063319	0.0153915	1.97079e-05	0.997452	0.283242
18	rs1811441	51192592	A	G	64941	0.297449	0.0627773	0.0152618	1.97286e-05	0.989433	0.297449
13	rs3904913	55689610	G	A	64941	0.716763	0.0633141	0.0153915	1.97386e-05	0.997454	0.283237
4	rs2354947	48886730	C	A	64941	0.11231	0.0905343	0.0220132	1.9749e-05	0.995928	0.11231
4	rs56321980	63050005	T	C	64941	0.885939	-0.0899599	0.0218713	1.97652e-05	0.996615	0.114061
4	rs4860453	63028727	G	A	64941	0.885868	-0.0899394	0.0218662	1.97658e-05	0.996074	0.114132
18	rs1370902	24238391	C	A	64941	0.382768	0.0589268	0.0143328	1.98731e-05	0.996521	0.382768
13	rs9569204	55697238	C	G	64941	0.716848	0.0632893	0.0153917	1.98896e-05	0.997762	0.283152
13	rs9569205	55699450	A	T	64941	0.716848	0.0632881	0.0153916	1.98953e-05	0.997769	0.283152
13	rs9569208	55706281	T	G	64941	0.716851	0.0632794	0.0153898	1.99038e-05	0.997959	0.283149
1	rs150297799	79342979	C	A	64941	0.937501	-0.117586	0.0286059	1.99072e-05	0.997988	0.0624985
13	rs9569209	55707745	C	T	64941	0.716851	0.0632758	0.0153902	1.99353e-05	0.997934	0.283149
1	rs75096079	79301422	C	T	64941	0.937991	-0.118194	0.0287572	1.9959e-05	0.995062	0.0620086
10	rs11013352	23541792	C	T	64941	0.53928	0.0577774	0.014052	1.99596e-05	0.984433	0.46072
13	rs9569207	55703475	C	A	64941	0.716871	0.0632717	0.0153904	1.99647e-05	0.997926	0.283129
1	rs78465007	79301525	G	T	64941	0.937991	-0.118181	0.0287569	1.9996e-05	0.995066	0.0620093
1	rs114817960	79300710	G	A	64941	0.937991	-0.118187	0.0287585	2.00003e-05	0.994967	0.062009
1	rs17102292	79303616	A	C	64941	0.937987	-0.118163	0.0287539	2.00158e-05	0.995232	0.0620125
7	rs117073814	152911290	T	C	64941	0.989806	-0.300279	0.0731392	2.00382e-05	0.875475	0.0101937
1	rs17102289	79300291	A	G	64941	0.937992	-0.118173	0.0287595	2.00561e-05	0.994919	0.0620079
12	rs17094647	44835241	A	G	64941	0.966347	-0.157938	0.0384296	2.00817e-05	0.996356	0.0336533
13	rs2316647	55730736	G	C	64941	0.716922	0.0632467	0.0153893	2.00882e-05	0.998151	0.283078
1	rs74328724	79300000	G	A	64941	0.937993	-0.11816	0.0287604	2.01122e-05	0.994863	0.0620066
18	rs8097994	24239438	A	C	64941	0.382646	0.0588815	0.0143308	2.01146e-05	0.996468	0.382646
9	rs73641216	9108724	C	T	64941	0.980479	-0.208075	0.0506669	2.01147e-05	0.980764	0.0195212
18	rs2292042	51031932	C	T	64941	0.554661	-0.0577246	0.0140488	2.01467e-05	0.985558	0.445339
13	rs34859288	55819589	T	A	64941	0.716022	0.0631551	0.0153711	2.01865e-05	0.998369	0.283978
1	rs112337117	79342574	A	G	64941	0.937501	-0.117501	0.0286063	2.01884e-05	0.997944	0.0624991
18	rs62100769	50739860	G	A	64941	0.53744	-0.0570467	0.0138832	2.01951e-05	0.999413	0.46256
18	rs8097875	24239391	A	G	64941	0.382643	0.0588683	0.0143308	2.0201e-05	0.99648	0.382643
18	rs55906054	50740163	A	G	64941	0.537284	-0.0570486	0.0138848	2.02262e-05	0.999237	0.462716
13	rs2316646	55730836	A	G	64941	0.717005	0.063219	0.0153912	2.03062e-05	0.998083	0.282995
13	rs67255119	55721977	T	C	64941	0.716861	0.0632108	0.0153893	2.03084e-05	0.998042	0.283139
13	rs3936206	55736947	T	G	64941	0.716896	0.0631903	0.0153848	2.03216e-05	0.998583	0.283104
1	rs61350937	79344312	C	T	64941	0.937497	-0.117458	0.0286056	2.03221e-05	0.998004	0.0625025
1	rs114247922	79298643	G	A	64941	0.938058	-0.11832	0.0288152	2.03237e-05	0.992083	0.0619422
13	rs1338785	55790635	C	G	64941	0.715951	0.0631049	0.0153645	2.0329e-05	0.998705	0.284049
1	rs2171713	79344222	C	A	64941	0.937498	-0.117451	0.0286056	2.03456e-05	0.998001	0.0625025
13	rs61951290	55738869	G	A	64941	0.716888	0.0631859	0.015385	2.03529e-05	0.998538	0.283112
18	rs8086812	50739344	C	G	64941	0.537434	-0.0570209	0.0138828	2.03573e-05	0.999486	0.462567
3	rs75060442	62676823	T	G	64941	0.87158	0.0858765	0.02091	2.0359e-05	0.989704	0.12842
1	rs113402239	79341902	A	C	64941	0.937496	-0.117425	0.0286053	2.04255e-05	0.997902	0.0625042
1	rs17401994	79298460	T	C	64941	0.938083	-0.118364	0.0288338	2.0429e-05	0.991206	0.0619168
1	rs112844546	79341849	T	C	64941	0.937495	-0.117415	0.0286052	2.04571e-05	0.997902	0.0625048
4	rs71609011	159786779	G	A	64941	0.975744	0.190116	0.0463301	2.04889e-05	0.955572	0.024256
18	rs17487130	50715417	C	T	64941	0.56605	-0.0573384	0.0139656	2.05312e-05	0.999506	0.43395
4	rs2193119	63022211	C	T	64941	0.885912	-0.0897667	0.0218679	2.05349e-05	0.996242	0.114088
6	rs55923651	27838041	G	T	64941	0.968967	-0.16562	0.0403681	2.05441e-05	0.98529	0.0310334
6	rs847755	40030378	T	C	64941	0.729333	0.0641356	0.0156123	2.05659e-05	0.997123	0.270667
4	rs75511183	63036170	G	C	64941	0.885974	-0.0898113	0.0218808	2.05711e-05	0.995921	0.114026
19	rs149039984	366055	G	T	64941	0.974918	-0.189809	0.0462633	2.05791e-05	0.917422	0.0250817
13	rs66489536	55723667	A	G	64941	0.716869	0.0631609	0.0153893	2.06152e-05	0.998042	0.283131
13	rs9569216	55731612	G	A	64941	0.716943	0.0631466	0.0153863	2.06284e-05	0.998531	0.283057
4	rs6854221	63009401	G	A	64941	0.885936	-0.0897693	0.0218743	2.06386e-05	0.995888	0.114064
13	rs7337810	55723010	C	A	64941	0.71687	0.0631585	0.0153897	2.06417e-05	0.998012	0.28313
13	rs12877106	55719708	A	G	64941	0.716869	0.0631579	0.01539	2.06509e-05	0.997984	0.283131
1	rs111688387	79341687	G	A	64941	0.937494	-0.117354	0.0286047	2.0655e-05	0.99791	0.0625058
13	rs73208916	60284556	T	G	64941	0.959585	0.149915	0.0365527	2.06724e-05	0.930344	0.0404145
4	rs75577733	63024391	A	G	64941	0.885902	-0.0897287	0.0218672	2.06889e-05	0.996247	0.114098
1	rs12119306	30318887	C	T	64941	0.836119	0.0777733	0.0189548	2.07143e-05	0.981369	0.163881
4	rs17226461	63047407	C	T	64941	0.885926	-0.0897413	0.0218723	2.07231e-05	0.99635	0.114074
4	rs77198657	63047483	G	T	64941	0.885926	-0.0897404	0.0218723	2.07271e-05	0.996353	0.114074
13	rs9569243	55809875	G	A	64941	0.716603	0.0631102	0.0153816	2.07291e-05	0.998049	0.283397
13	rs1583559	55901931	A	T	64941	0.714626	0.0629824	0.015352	2.07549e-05	0.998086	0.285374
4	rs4860457	63051489	G	T	64941	0.885986	-0.0897329	0.021872	2.0755e-05	0.996815	0.114014
4	rs79192186	63054101	T	C	64941	0.885992	-0.0897091	0.021869	2.08055e-05	0.997195	0.114008
13	rs6561830	55910324	A	T	64941	0.714636	0.0629853	0.0153552	2.08197e-05	0.997632	0.285364
13	rs7325408	55904500	A	G	64941	0.714606	0.0629706	0.0153518	2.08232e-05	0.998102	0.285394
4	rs1963923	186281879	A	G	64941	0.720241	0.0635138	0.0154806	2.08241e-05	0.993631	0.279759
13	rs7325361	55904377	C	G	64941	0.714606	0.0629688	0.0153517	2.08345e-05	0.998103	0.285394
13	rs7325673	55904324	G	T	64941	0.714606	0.0629684	0.0153517	2.0837e-05	0.998103	0.285394
4	rs56853316	63036951	T	A	64941	0.885905	-0.0896993	0.0218706	2.08778e-05	0.996404	0.114095
4	rs58679106	63036964	A	T	64941	0.885905	-0.0896993	0.0218706	2.08778e-05	0.996404	0.114095
4	rs75660784	63043401	C	T	64941	0.885913	-0.089702	0.0218716	2.08846e-05	0.996363	0.114087
3	rs4260431	62676835	G	A	64941	0.128543	-0.0857323	0.0209044	2.09075e-05	0.989614	0.128543
4	rs4860456	63051207	G	A	64941	0.885937	-0.0896812	0.0218683	2.09175e-05	0.99677	0.114063
4	rs76061480	63054104	T	C	64941	0.886089	-0.0897366	0.021882	2.09203e-05	0.996696	0.113911
4	rs59283737	63054547	C	G	64941	0.88599	-0.0896669	0.0218675	2.09641e-05	0.997334	0.11401
13	rs9569298	55903027	C	T	64941	0.714617	0.0629465	0.0153515	2.09698e-05	0.998129	0.285383
13	rs1583558	55902196	A	T	64941	0.714617	0.062945	0.0153515	2.09788e-05	0.998131	0.285383
13	rs9569297	55901283	A	T	64941	0.714617	0.0629428	0.0153515	2.0993e-05	0.998132	0.285383
13	rs7338318	55810982	G	A	64941	0.716432	0.0630369	0.0153742	2.09977e-05	0.998524	0.283568
13	rs9569296	55900982	C	T	64941	0.714617	0.0629397	0.0153515	2.10122e-05	0.998133	0.285383
13	rs1821758	55901006	A	G	64941	0.714617	0.0629397	0.0153515	2.10122e-05	0.998133	0.285383
6	rs847777	40055754	C	T	64941	0.729588	0.0641046	0.0156236	2.1042e-05	0.9967	0.270412
4	rs78324296	63021440	G	A	64941	0.885892	-0.0896413	0.0218665	2.10634e-05	0.996244	0.114108
13	rs9569294	55898665	T	G	64941	0.714617	0.062929	0.0153514	2.10762e-05	0.998145	0.285383
13	rs17051830	55898259	T	C	64941	0.714617	0.0629277	0.0153513	2.10843e-05	0.998146	0.285383
13	rs9569293	55898492	T	C	64941	0.714617	0.0629277	0.0153513	2.10843e-05	0.998146	0.285383
13	rs12874723	55743075	G	A	64941	0.716925	0.0630621	0.0153843	2.11096e-05	0.99871	0.283075
4	rs74507226	63052397	T	C	64941	0.885998	-0.0896449	0.0218717	2.11401e-05	0.996938	0.114002
18	rs10221371	50726294	C	A	64941	0.537452	-0.0569015	0.0138815	2.11488e-05	0.999689	0.462548
2	rs79077874	28633407	G	C	64941	0.985857	-0.260165	0.063538	2.12068e-05	0.836712	0.0141426
4	rs75615981	63052664	G	A	64941	0.885999	-0.0896187	0.0218714	2.12518e-05	0.99698	0.114001
1	rs17102324	79322305	C	T	64941	0.937886	-0.117585	0.0287047	2.1268e-05	0.997519	0.0621135
4	rs57737675	63020574	C	A	64941	0.88593	-0.0895982	0.0218712	2.13431e-05	0.996135	0.11407
19	rs56272987	366613	G	A	64941	0.973272	-0.184749	0.0451133	2.136e-05	0.90762	0.0267276
14	rs10873268	75008846	C	T	64941	0.392339	0.0582553	0.0142158	2.13833e-05	0.994466	0.392339
6	rs847743	40087154	C	G	64941	0.730327	0.0641973	0.0156597	2.13941e-05	0.993691	0.269673
13	rs9601766	82494257	C	T	64941	0.69829	-0.0624516	0.0152432	2.14187e-05	0.978835	0.30171
18	rs7359724	51276142	A	G	64941	0.597045	-0.0580346	0.0141718	2.14943e-05	0.996303	0.402955
6	rs847752	40034557	T	C	64941	0.758858	0.0665226	0.0162375	2.15236e-05	0.996952	0.241142
4	rs79177577	63053057	C	A	64941	0.886	-0.0895499	0.0218708	2.15528e-05	0.997046	0.114
11	rs835768	44909493	A	G	64941	0.531664	0.0581996	0.0142144	2.1554e-05	0.958785	0.468336
13	rs7322125	55752018	G	A	64941	0.716913	0.0629685	0.01538	2.15975e-05	0.9992	0.283087
22	rs1771546	19182813	T	C	64941	0.0449055	-0.144714	0.0353699	2.16768e-05	0.898564	0.0449055
13	rs4512987	55759353	A	G	64941	0.716915	0.062954	0.0153801	2.16939e-05	0.999193	0.283085
13	rs9569224	55754497	A	T	64941	0.716915	0.0629502	0.0153801	2.17184e-05	0.999196	0.283085
4	rs74354344	63016492	G	A	64941	0.885936	-0.0894961	0.0218712	2.18095e-05	0.996168	0.114064
13	rs9563292	55749185	G	T	64941	0.716954	0.0629497	0.0153836	2.18159e-05	0.998954	0.283046
18	rs34155787	24237080	T	G	64941	0.382549	0.0586379	0.0143334	2.18376e-05	0.996229	0.382549
13	rs12862973	55753913	C	T	64941	0.716903	0.0629288	0.0153803	2.18665e-05	0.999148	0.283097
13	rs9569235	55794226	A	C	64941	0.71672	0.0629728	0.0153919	2.18758e-05	0.996644	0.28328
12	rs17121326	44835334	A	G	64941	0.96633	-0.157183	0.0384197	2.18938e-05	0.996422	0.0336699
13	rs4885708	55726692	A	G	64941	0.716915	0.0629577	0.0153894	2.19188e-05	0.99813	0.283085
13	rs35495749	55897994	T	G	64941	0.714625	0.0627981	0.0153521	2.19451e-05	0.998043	0.285375
4	rs79273478	63053719	T	A	64941	0.886	-0.0894558	0.0218699	2.1969e-05	0.997145	0.114001
6	rs11965789	4470878	C	T	64941	0.978746	-0.197777	0.0483861	2.20273e-05	0.98168	0.0212537
4	rs6817335	63014109	A	G	64941	0.885935	-0.0894424	0.0218712	2.20578e-05	0.996178	0.114065
22	rs1633395	19181154	A	G	64941	0.0449106	-0.14452	0.0353685	2.22182e-05	0.898462	0.0449106
13	rs9563295	55763861	T	A	64941	0.716872	0.0628656	0.0153782	2.22277e-05	0.99931	0.283128
6	rs847784	40053272	A	G	64941	0.729558	0.0639076	0.0156222	2.22715e-05	0.99673	0.270442
4	rs79114502	63052749	G	A	64941	0.885917	-0.0893856	0.0218698	2.22971e-05	0.99636	0.114083
13	rs9316780	55864807	C	T	64941	0.71481	0.0627419	0.015352	2.23201e-05	0.998929	0.28519
4	rs77453364	63021347	G	A	64941	0.885879	-0.0893342	0.0218626	2.24037e-05	0.996179	0.114121
18	rs2879624	51421562	C	T	64941	0.493358	-0.0569101	0.0139299	2.24404e-05	0.995407	0.493358
6	rs847747	40080069	G	T	64941	0.730435	0.063996	0.0156499	2.24412e-05	0.995727	0.269565
12	rs186731384	12410624	G	C	64941	0.98558	-0.238793	0.0585052	2.24858e-05	0.983722	0.0144201
13	rs9563296	55764633	A	G	64941	0.716878	0.0628249	0.0153783	2.25022e-05	0.999303	0.283122
13	rs12868292	55879791	A	C	64941	0.715333	0.0627922	0.0153717	2.25155e-05	0.996877	0.284667
23	rs149358251	130448182	T	C	55863	0.986692	-0.257579	0.0633185	2.25306e-05	0.771909	0.0139985
1	rs112084944	79342260	C	T	64941	0.937042	-0.116563	0.0285458	2.25787e-05	0.995538	0.0629585
18	rs1498130	51419557	T	C	64941	0.493532	-0.0568811	0.0139308	2.26856e-05	0.995194	0.493532
13	rs4548750	55768638	A	G	64941	0.716881	0.0627955	0.0153782	2.27006e-05	0.999316	0.283119
13	rs75134429	60653117	C	T	64941	0.952468	0.13691	0.0335465	2.27327e-05	0.939788	0.0475317
1	rs17102309	79306199	A	C	64941	0.940925	-0.120495	0.0295179	2.27466e-05	0.987797	0.059075
13	rs12871171	55760038	C	A	64941	0.716931	0.0628022	0.0153818	2.2754e-05	0.999073	0.283069
13	rs12864898	55771651	A	G	64941	0.71688	0.0627846	0.0153782	2.27751e-05	0.999328	0.28312
4	rs17292233	63055561	C	G	64941	0.886	-0.0892457	0.0218617	2.28054e-05	0.997991	0.114
4	rs17226475	63055712	T	A	64941	0.886003	-0.0892455	0.0218624	2.2819e-05	0.997965	0.113997
18	rs1370903	24234799	C	A	64941	0.423616	0.0575503	0.0141006	2.28309e-05	0.995442	0.423616
4	rs4860458	63055088	G	A	64941	0.885997	-0.0892315	0.021862	2.28787e-05	0.997959	0.114003
13	rs1370078	55812855	G	T	64941	0.716443	0.0627171	0.0153736	2.31028e-05	0.998633	0.283557
23	rs969738	127828720	G	A	55863	0.497463	-0.0544579	0.0133759	2.31107e-05	0.969067	0.495541
13	rs4408432	55770663	T	A	64941	0.716887	0.062733	0.0153777	2.31168e-05	0.999358	0.283113
1	rs6690213	79305771	C	G	64941	0.940917	-0.120385	0.0295188	2.31532e-05	0.987646	0.0590827
18	rs8087644	51429498	A	G	64941	0.493262	-0.0568108	0.0139289	2.31633e-05	0.995692	0.493262
6	rs12194361	40116264	T	G	64941	0.269897	-0.0640154	0.0156823	2.31724e-05	0.99033	0.269897
4	rs77766581	63053163	A	T	64941	0.886009	-0.0891904	0.021871	2.32589e-05	0.997072	0.113991
13	rs4468482	55770580	A	G	64941	0.716895	0.0627052	0.0153783	2.33255e-05	0.999321	0.283105
18	rs8087783	51429527	C	T	64941	0.493338	-0.0567801	0.013928	2.33718e-05	0.995735	0.493338
13	rs7982862	55778003	G	A	64941	0.71689	0.0626932	0.015377	2.33722e-05	0.999458	0.28311
4	rs3822302	186272773	T	C	64941	0.705042	0.062491	0.0153244	2.33971e-05	0.982428	0.294958
13	rs61960931	55788368	T	A	64941	0.715971	0.0626317	0.015364	2.34298e-05	0.998796	0.284029
9	rs1073496	7107769	G	A	64941	0.559605	0.0574795	0.0141019	2.35467e-05	0.985089	0.440395
3	rs4680168	155084800	G	A	64941	0.219449	0.0690077	0.0169362	2.35743e-05	0.983039	0.219449
13	rs3922434	55781300	C	T	64941	0.71689	0.0626502	0.0153763	2.36564e-05	0.999493	0.28311
16	rs11639960	55533270	A	G	64941	0.66522	0.061033	0.0149834	2.37298e-05	0.970578	0.33478
3	rs4431159	155084320	C	T	64941	0.219217	0.0690131	0.0169442	2.37482e-05	0.9829	0.219217
13	rs111260336	60545182	G	A	64941	0.952856	0.138003	0.0338945	2.37544e-05	0.930246	0.0471441
13	rs9569230	55779080	A	G	64941	0.716934	0.0626498	0.0153807	2.37848e-05	0.999161	0.283066
9	rs1578104	23242643	A	G	64941	0.704621	0.0633123	0.015548	2.38372e-05	0.961923	0.295379
6	rs143099908	27667247	A	G	64941	0.968684	-0.162999	0.0400499	2.39161e-05	0.993281	0.0313157
11	rs143557209	33318846	G	A	64941	0.983959	0.250721	0.0616277	2.39251e-05	0.803951	0.0160405
18	rs16957060	51187089	T	G	64941	0.699179	-0.0623437	0.0153116	2.39557e-05	0.976763	0.300821
18	rs1370905	24234510	A	C	64941	0.423595	0.0574016	0.0141007	2.39714e-05	0.995474	0.423595
18	rs56327309	50630791	C	G	64941	0.591537	-0.0576219	0.0141499	2.40694e-05	0.989438	0.408463
5	rs28488569	180645353	A	G	64941	0.881942	-0.0885617	0.0217581	2.40827e-05	0.977371	0.118058
18	rs4283294	51429769	T	C	64941	0.493556	-0.056679	0.0139261	2.41065e-05	0.995831	0.493556
18	rs1498160	51430749	T	C	64941	0.493555	-0.0566783	0.0139261	2.41141e-05	0.995828	0.493555
7	rs17601859	20960893	G	T	64941	0.870586	-0.0852387	0.0209422	2.41639e-05	0.977343	0.129414
3	rs9841865	155083784	C	T	64941	0.21933	0.0689348	0.0169409	2.41729e-05	0.982734	0.21933
13	rs9569236	55794437	C	T	64941	0.717112	0.0627239	0.015412	2.41821e-05	0.994604	0.282888
18	rs1039193	51430599	A	G	64941	0.493515	-0.0566655	0.0139266	2.423e-05	0.99572	0.493515
18	rs1498164	51432215	A	T	64941	0.493985	-0.056716	0.0139397	2.4251e-05	0.99435	0.493985
18	rs4100583	51204980	C	T	64941	0.413703	0.0575229	0.0141363	2.42525e-05	0.992582	0.413703
18	rs1370904	24234583	T	C	64941	0.423625	0.0573594	0.0141008	2.43081e-05	0.995484	0.423625
18	rs1039194	51430694	T	G	64941	0.493725	-0.0566503	0.0139261	2.43364e-05	0.995748	0.493725
18	rs17487277	50718944	C	G	64941	0.562874	-0.056824	0.0139696	2.44655e-05	0.99936	0.437126
12	rs78278615	44829334	A	G	64941	0.966283	-0.156194	0.0384134	2.45927e-05	0.995382	0.0337172
4	rs6447674	48897187	C	T	64941	0.11238	0.0894986	0.0220167	2.4628e-05	0.99535	0.11238
18	rs3886639	24233830	C	T	64941	0.423632	0.0572991	0.0141004	2.47768e-05	0.995568	0.423632
6	rs1721409	40112439	A	T	64941	0.730044	0.0637495	0.0156769	2.49063e-05	0.990478	0.269956
18	rs4286169	51431602	C	T	64941	0.494927	-0.0566532	0.013948	2.50364e-05	0.992475	0.494927
14	rs140604507	77136293	G	A	64941	0.986735	-0.271295	0.0668419	2.50669e-05	0.818591	0.0132649
13	rs77525843	60626665	G	A	64941	0.952497	0.136284	0.0335708	2.51164e-05	0.939766	0.0475027
6	rs9504100	4440895	C	T	64941	0.978281	-0.194513	0.0479224	2.51189e-05	0.981866	0.0217192
18	rs4533358	51431635	A	G	64941	0.494969	-0.0566361	0.0139464	2.51251e-05	0.992795	0.494969
1	rs113482208	79344074	G	A	64941	0.937205	-0.116087	0.0285967	2.5215e-05	0.994515	0.0627948
9	rs2025324	7102389	A	G	64941	0.548885	0.0571538	0.0140791	2.54054e-05	0.984933	0.451115
6	rs1330795	4465676	C	T	64941	0.978369	-0.194042	0.0478418	2.54744e-05	0.987777	0.0216314
1	rs11240500	205472327	C	G	64941	0.78541	-0.0691873	0.017058	2.56538e-05	0.979167	0.21459
18	rs4331407	24231712	T	C	64941	0.423751	0.0571919	0.0141007	2.56679e-05	0.995293	0.423751
12	rs77156404	44829613	G	A	64941	0.966274	-0.155774	0.0384081	2.57965e-05	0.99541	0.033726
18	rs62099230	50721712	G	A	64941	0.562816	-0.0566583	0.0139689	2.58105e-05	0.999344	0.437184
18	rs11659803	50635119	G	A	64941	0.568176	-0.0568311	0.014013	2.58936e-05	0.994713	0.431824
10	rs7904665	23544272	T	C	64941	0.493756	-0.0566806	0.0139782	2.59e-05	0.988662	0.493756
6	rs55658856	27197931	A	G	64941	0.972812	-0.174485	0.0430555	2.59185e-05	0.987742	0.027188
12	rs865505	26057497	G	T	64941	0.967578	0.159914	0.0394599	2.59194e-05	0.995725	0.0324216
18	rs1498161	51431676	C	T	64941	0.493306	-0.0564756	0.0139308	2.59405e-05	0.995064	0.493306
10	rs7904764	23544298	T	C	64941	0.493745	-0.056671	0.0139779	2.59719e-05	0.988678	0.493745
3	rs6769372	155082806	G	T	64941	0.219319	0.0687122	0.0169532	2.6025e-05	0.981183	0.219319
3	rs115956719	45045267	G	A	64941	0.979824	-0.202647	0.0500265	2.60386e-05	0.981621	0.0201756
13	rs4771959	97383770	G	A	64941	0.601786	0.0577451	0.0142505	2.61211e-05	0.991354	0.398214
13	rs75636347	60602693	C	T	64941	0.952298	0.136015	0.0335778	2.61428e-05	0.936483	0.0477021
8	rs72663274	61060460	C	T	64941	0.915565	0.105747	0.0260993	2.61515e-05	0.919532	0.084435
12	rs995796	26048687	G	A	64941	0.967578	0.160068	0.039539	2.6425e-05	0.99185	0.0324222
8	rs58713171	40228878	C	G	64941	0.872662	0.085109	0.0210186	2.66009e-05	0.979622	0.127338
18	rs62097947	50555931	A	T	64941	0.568382	-0.0570239	0.0140852	2.67158e-05	0.986422	0.431618
2	rs114967978	164770733	T	C	64941	0.94652	-0.126264	0.0312142	2.6973e-05	0.965521	0.0534798
18	rs17408393	50709981	A	G	64941	0.562887	-0.056531	0.0139728	2.70509e-05	0.998578	0.437113
9	rs665029	10436123	A	C	64941	0.954465	-0.136954	0.0338735	2.70858e-05	0.96771	0.0455354
18	rs8097041	50898217	A	T	64941	0.353101	-0.0591126	0.0146178	2.71691e-05	0.993189	0.353101
18	rs4940301	51436933	C	G	64941	0.740525	0.0644475	0.0159363	2.71769e-05	0.989992	0.259475
3	rs34875360	62729049	A	T	64941	0.874542	0.0852358	0.0210776	2.72311e-05	0.995327	0.125458
13	rs9567416	44908741	T	C	64941	0.734841	0.0636919	0.0157524	2.7234e-05	0.999227	0.265159
6	rs6939764	25219230	G	A	64941	0.0217743	0.193737	0.0479481	2.72702e-05	0.985523	0.0217743
6	rs6939460	25219205	C	T	64941	0.0217738	0.193709	0.0479486	2.73475e-05	0.985525	0.0217738
3	rs11130897	62722808	A	G	64941	0.873856	0.0849508	0.0210132	2.73799e-05	0.996613	0.126143
6	rs847750	40074250	G	A	64941	0.730399	0.0632657	0.0156375	2.74013e-05	0.996747	0.269601
1	rs12047520	225944485	G	A	64941	0.886501	-0.0889832	0.0220194	2.74778e-05	0.98398	0.113499
12	rs706540	26055082	A	G	64941	0.967312	0.158788	0.0393063	2.74957e-05	0.996034	0.0326882
9	rs77498747	9100564	T	C	64941	0.980293	-0.203847	0.0504814	2.76434e-05	0.979198	0.0197068
18	rs16957445	51403368	C	T	64941	0.714854	0.0622946	0.0154185	2.76653e-05	0.996464	0.285146
3	rs13100557	62723311	G	T	64941	0.87387	0.0849034	0.0210157	2.7723e-05	0.996586	0.12613
3	rs75189545	62722484	C	G	64941	0.873861	0.0848941	0.0210135	2.77279e-05	0.99663	0.126139
18	rs9807159	24233441	C	T	64941	0.42405	0.0569948	0.0141114	2.77521e-05	0.994446	0.42405
12	rs12308555	26044432	A	G	64941	0.96742	0.159486	0.0395098	2.78936e-05	0.988453	0.0325798
6	rs75760474	4469273	A	G	64941	0.978394	-0.19385	0.0480308	2.79294e-05	0.981355	0.0216056
18	rs9964176	52751578	G	T	64941	0.599967	-0.0572645	0.0141906	2.82562e-05	0.994111	0.400033
8	rs62507096	40218055	G	A	64941	0.872443	0.0845808	0.0209597	2.83342e-05	0.983315	0.127557
3	rs13087697	62721083	C	T	64941	0.873863	0.0847931	0.0210138	2.83496e-05	0.996618	0.126137
18	rs4940302	51437439	C	T	64941	0.740506	0.0642916	0.0159361	2.84151e-05	0.989991	0.259494
4	rs9999333	34888788	G	A	64941	0.477901	0.0562366	0.0139422	2.85009e-05	0.990593	0.477901
18	rs8091068	50900432	T	C	64941	0.353197	-0.0589464	0.0146147	2.85111e-05	0.99325	0.353197
18	rs62096676	51356673	T	A	64941	0.687168	-0.0604877	0.0149984	2.86385e-05	0.997981	0.312832
12	rs10846090	15101036	A	G	64941	0.764056	-0.0868698	0.0215437	2.86516e-05	0.575373	0.235944
9	rs10115737	10434419	A	C	64941	0.954748	-0.136863	0.0339566	2.86987e-05	0.968849	0.0452523
8	rs141016536	40209493	C	T	64941	0.872638	0.0846205	0.0209864	2.87693e-05	0.982413	0.127362
8	rs10504022	40221074	G	A	64941	0.872401	0.0844826	0.0209543	2.88078e-05	0.983509	0.127599
3	rs35536641	62724583	A	T	64941	0.873854	0.0847227	0.0210147	2.88104e-05	0.996596	0.126146
13	rs9567414	44908211	A	G	64941	0.734971	0.0635287	0.0157614	2.88573e-05	0.998748	0.265029
3	rs71296795	62724956	C	G	64941	0.873855	0.0847091	0.0210147	2.88971e-05	0.996592	0.126145
4	rs76511949	7151656	C	T	64941	0.750069	-0.06828	0.0169447	2.9016e-05	0.89322	0.249931
19	rs10422863	367089	G	A	64941	0.974239	-0.182844	0.0453831	2.9017e-05	0.927252	0.0257614
10	rs60792920	52448782	C	T	64941	0.854326	-0.0828803	0.0205714	2.90404e-05	0.91647	0.145674
9	rs10121955	10434614	C	T	64941	0.957529	-0.140702	0.0349372	2.91278e-05	0.972963	0.0424707
3	rs13089803	62709066	A	C	64941	0.874421	0.0849445	0.0210854	2.92045e-05	0.993949	0.125579
3	rs34301583	62709672	T	G	64941	0.873812	0.0847036	0.021026	2.92164e-05	0.995277	0.126188
19	rs73537457	19299461	G	A	64941	0.904514	-0.0957281	0.0237521	2.92896e-05	0.986452	0.095486
9	rs59754470	9102070	T	C	64941	0.98031	-0.203317	0.0505092	2.9302e-05	0.979058	0.0196901
18	rs1391446	51419366	G	C	64941	0.486002	-0.0561584	0.0139455	2.93931e-05	0.993067	0.486002
8	rs12680723	141994803	G	A	64941	0.553556	0.0562592	0.0139708	2.95118e-05	0.998696	0.446444
1	rs7531816	79351617	T	C	64941	0.93745	-0.115105	0.0285958	2.95229e-05	0.997745	0.0625504
3	rs35027010	62727875	C	A	64941	0.874518	0.0848444	0.0210736	2.95414e-05	0.995529	0.125482
8	rs117560744	17535522	T	C	64941	0.984803	-0.240254	0.0597348	2.95572e-05	0.907795	0.0151975
3	rs11706313	62727430	T	C	64941	0.87452	0.0848149	0.0210734	2.97246e-05	0.995556	0.12548
4	rs1714932	34874250	A	G	64941	0.52457	-0.0561287	0.0139477	2.97413e-05	0.990922	0.47543
12	rs2643932	26064983	G	A	64941	0.96734	0.158235	0.0393415	2.98145e-05	0.995116	0.0326597
18	rs4402631	51358701	T	C	64941	0.687263	-0.0603834	0.0150057	2.98161e-05	0.997527	0.312737
5	rs4523038	117170076	C	G	64941	0.736456	-0.0633485	0.0157474	2.98921e-05	0.991765	0.263544
6	rs12663184	30301600	C	T	64941	0.892952	-0.0900279	0.022383	2.99282e-05	0.998732	0.107048
17	rs118033223	78277533	G	A	64941	0.957931	-0.147433	0.0366539	2.99702e-05	0.896603	0.0420692
10	rs11013408	23632970	T	G	64941	0.507461	-0.0569342	0.0141527	3.00371e-05	0.959897	0.492539
6	rs4464773	9249495	T	C	64941	0.369703	-0.0598412	0.0148766	3.00869e-05	0.940783	0.369703
3	rs34660911	62711228	A	G	64941	0.873667	0.0844861	0.0210102	3.02089e-05	0.995312	0.126333
6	rs1743969	40096918	A	G	64941	0.728959	0.0629842	0.0156513	3.02334e-05	0.991729	0.271041
1	rs141520385	239347381	A	C	64941	0.987647	-0.264122	0.0657467	3.02483e-05	0.901431	0.0123535
6	rs11968847	9249688	T	C	64941	0.369372	-0.0597509	0.014863	3.04201e-05	0.942412	0.369372
3	rs35792926	62711596	T	G	64941	0.873432	0.0843716	0.0209954	3.05632e-05	0.995061	0.126568
4	rs77830012	188358460	A	C	64941	0.987966	-0.2767	0.068925	3.05817e-05	0.8477	0.012034
18	rs62100765	50735418	C	T	64941	0.5652	-0.056111	0.013961	3.05879e-05	0.999676	0.4348
18	rs2081308	51352992	C	T	64941	0.68695	-0.0602641	0.0149971	3.05985e-05	0.998012	0.31305
18	rs1498162	51431769	A	G	64941	0.493249	-0.0559658	0.0139292	3.06021e-05	0.995621	0.493249
12	rs829822	26054141	C	T	64941	0.966687	0.156652	0.0390057	3.06213e-05	0.993297	0.033313
5	rs35677916	28191600	G	A	64941	0.989603	-0.287104	0.0714959	3.06302e-05	0.897439	0.0103971
5	rs35032551	180660259	G	T	64941	0.87783	-0.0863643	0.0214937	3.066e-05	0.972096	0.12217
5	rs4920993	117152947	T	C	64941	0.733578	-0.0629606	0.0156758	3.07555e-05	0.996043	0.266422
12	rs1182886	26051908	T	C	64941	0.967356	0.157904	0.0393291	3.08025e-05	0.996111	0.0326444
12	rs12297557	26045939	G	A	64941	0.967399	0.158396	0.0394557	3.08578e-05	0.990673	0.0326007
9	rs620558	10436921	A	G	64941	0.954058	-0.135896	0.0338512	3.08659e-05	0.961069	0.0459425
5	rs13176616	117163834	A	G	64941	0.733232	-0.0629307	0.0156719	3.08834e-05	0.996093	0.266768
10	rs61851196	72701898	G	A	64941	0.986064	0.246691	0.061486	3.10052e-05	0.938628	0.0139361
18	rs11663694	50559986	T	C	64941	0.567428	-0.0565394	0.0140794	3.10209e-05	0.986699	0.432572
13	rs1571561	44907942	T	G	64941	0.734867	0.063265	0.0157593	3.10677e-05	0.998715	0.265133
12	rs706541	26060934	T	C	64941	0.967358	0.157791	0.039331	3.12344e-05	0.996118	0.0326419
5	rs588820	818658	G	A	64941	0.814407	-0.0808189	0.0201389	3.12797e-05	0.79114	0.185593
13	rs4942316	44906847	C	T	64941	0.734993	0.0633017	0.0157777	3.14e-05	0.996672	0.265007
3	rs34474965	62713769	C	T	64941	0.87387	0.0842959	0.0210115	3.15158e-05	0.996807	0.12613
9	rs10976047	7120851	A	G	64941	0.553392	0.0563871	0.0140553	3.15913e-05	0.988174	0.446608
5	rs34632973	117179127	C	T	64941	0.737703	-0.0631249	0.0157417	3.16781e-05	0.995631	0.262297
5	rs9688162	117175750	A	G	64941	0.735876	-0.0630173	0.0157163	3.17024e-05	0.995943	0.264124
4	rs2354948	48907835	G	A	64941	0.111619	0.0884643	0.0220658	3.18127e-05	0.995937	0.111619
5	rs62377984	117159661	G	T	64941	0.733629	-0.0628514	0.015682	3.19754e-05	0.995922	0.266371
13	rs4942317	44907005	T	A	64941	0.735062	0.0632227	0.0157741	3.19906e-05	0.997157	0.264938
9	rs1073495	7107843	A	G	64941	0.556724	0.0564861	0.0140903	3.20024e-05	0.984824	0.443276
13	rs7983067	44911556	C	T	64941	0.734247	0.0631868	0.0157661	3.20236e-05	0.996399	0.265753
13	rs4942318	44907006	A	G	64941	0.735066	0.0632083	0.0157743	3.21303e-05	0.997141	0.264934
3	rs13084271	105544994	G	A	64941	0.574317	-0.0567299	0.0141569	3.21728e-05	0.98671	0.425683
3	rs77690918	62716880	T	A	64941	0.873863	0.0842027	0.0210125	3.21831e-05	0.996681	0.126137
3	rs71296793	62716764	G	T	64941	0.873857	0.0842007	0.0210125	3.21988e-05	0.996641	0.126143
3	rs35368204	62714228	T	C	64941	0.874546	0.0844384	0.0210721	3.2205e-05	0.995827	0.125454
4	rs1706210	34869006	A	G	64941	0.530922	-0.0560021	0.0139781	3.2258e-05	0.988517	0.469078
3	rs13096260	62717399	C	T	64941	0.873863	0.0841871	0.0210124	3.22909e-05	0.996657	0.126137
1	rs7412505	193894956	G	A	64941	0.739426	0.0635963	0.0158742	3.23285e-05	0.993403	0.260574
12	rs11064123	6380978	C	T	64941	0.72669	-0.0647733	0.0161709	3.23316e-05	0.921984	0.27331
5	rs7733920	117166546	G	A	64941	0.735055	-0.0629133	0.0157086	3.23862e-05	0.995049	0.264945
3	rs2886894	62716076	T	A	64941	0.873862	0.0841692	0.0210124	3.2414e-05	0.99669	0.126138
4	rs144085188	188268031	C	A	64941	0.986987	-0.260012	0.0649668	3.24375e-05	0.883549	0.013013
18	rs12458228	52751455	G	A	64941	0.600016	-0.0568346	0.0141898	3.24426e-05	0.994037	0.399984
10	rs12413853	23574498	T	A	64941	0.50693	0.0561095	0.0140057	3.2446e-05	0.980524	0.49307
13	rs35806850	55759909	G	T	64941	0.718937	0.0617861	0.0154263	3.24756e-05	0.998425	0.281063
4	rs10938546	48907396	A	T	64941	0.111611	0.0883744	0.0220709	3.25424e-05	0.995467	0.111611
18	rs62097950	50573936	C	T	64941	0.568148	-0.0563388	0.014067	3.25645e-05	0.98839	0.431852
1	rs147227401	239493679	G	A	64941	0.988456	-0.277712	0.0694186	3.2615e-05	0.863938	0.0115442
15	rs4485297	69024801	T	C	64941	0.0836389	0.102365	0.0255724	3.26457e-05	0.971064	0.0836389
12	rs829833	26061583	T	G	64941	0.9673	0.15728	0.0393004	3.26765e-05	0.995887	0.0327002
13	rs1924403	106647859	G	A	64941	0.774766	-0.0669251	0.0167191	3.27721e-05	0.976309	0.225234
14	rs10873271	75008888	G	A	64941	0.39249	0.0569066	0.014213	3.28942e-05	0.994991	0.39249
4	rs1714934	34870113	A	C	64941	0.531092	-0.0558828	0.0139635	3.28976e-05	0.990492	0.468908
9	rs587729	10434220	G	A	64941	0.957437	-0.13956	0.0349002	3.31557e-05	0.972789	0.0425635
6	rs111374461	25231369	A	C	64941	0.981499	-0.206698	0.0517041	3.31595e-05	0.995277	0.0185005
9	rs74909128	9090208	T	G	64941	0.979671	-0.199661	0.0499414	3.32106e-05	0.971141	0.0203288
4	rs6824546	34892613	T	C	64941	0.476837	0.0557735	0.0139454	3.32812e-05	0.990867	0.476837
3	rs13076731	62719480	G	A	64941	0.873798	0.0840489	0.0210136	3.33013e-05	0.996163	0.126201
1	rs6424614	79352231	C	T	64941	0.937365	-0.114325	0.0285905	3.33144e-05	0.99702	0.0626351
9	rs12347543	10434956	C	A	64941	0.957499	-0.139586	0.0349165	3.33276e-05	0.973625	0.042501
3	rs13088171	62712170	T	A	64941	0.873826	0.0840307	0.0210114	3.33682e-05	0.996503	0.126174
12	rs4764548	6379534	A	G	64941	0.726768	-0.0646696	0.0161735	3.33844e-05	0.921911	0.273232
3	rs35354258	62680611	C	T	64941	0.867478	0.0823668	0.0205965	3.34232e-05	0.993099	0.132522
18	rs7233123	50718880	G	A	64941	0.53092	-0.0554997	0.0138796	3.34794e-05	0.999472	0.46908
4	rs7698238	63056880	C	T	64941	0.883732	-0.0866535	0.0216758	3.35655e-05	0.998341	0.116268
4	rs746513	48881441	A	G	64941	0.111465	0.0881749	0.0220617	3.36545e-05	0.997147	0.111465
4	rs62305104	56196768	G	C	64941	0.755523	-0.0649707	0.0162569	3.36863e-05	0.988423	0.244477
6	rs72924182	96500671	T	C	64941	0.982015	0.240079	0.060083	3.37354e-05	0.771387	0.0179848
12	rs1177523	26050181	C	T	64941	0.967382	0.157309	0.0393837	3.38408e-05	0.993748	0.0326178
13	rs1013092	44904741	C	T	64941	0.735098	0.0630786	0.0157874	3.38603e-05	0.995737	0.264902
13	rs1924581	97383106	G	C	64941	0.601369	0.0569918	0.0142669	3.39429e-05	0.989075	0.398631
4	rs11722973	186273973	C	T	64941	0.879044	0.0859096	0.0215036	3.41088e-05	0.990063	0.120956
18	rs7232543	50718757	A	G	64941	0.533999	-0.0554662	0.0138855	3.41177e-05	0.999537	0.466001
6	rs149045429	28490915	T	C	64941	0.956375	-0.135735	0.0339992	3.41675e-05	0.99653	0.0436247
22	rs3788727	46928266	G	A	64941	0.598961	-0.0595592	0.0149146	3.41713e-05	0.898501	0.401039
6	rs1923461	39984670	A	T	64941	0.730645	0.0625811	0.0156583	3.42482e-05	0.994582	0.269355
13	rs9567415	44908572	G	A	64941	0.734771	0.0628781	0.0157481	3.42857e-05	0.999481	0.265229
3	rs17066998	62704050	C	T	64941	0.868212	0.0824881	0.0206641	3.45189e-05	0.991996	0.131788
6	rs9369159	39998853	T	C	64941	0.730274	0.0624914	0.0156459	3.4652e-05	0.995158	0.269726
7	rs35660429	70404645	T	C	64941	0.344867	0.0590635	0.0148013	3.46527e-05	0.977398	0.344867
4	rs10223011	34932285	C	T	64941	0.476294	0.0556341	0.0139424	3.4687e-05	0.991439	0.476294
6	rs1721411	40102390	T	G	64941	0.729368	0.0625036	0.0156502	3.47006e-05	0.992592	0.270632
14	rs1982531	27823806	A	C	64941	0.11945	-0.0853393	0.021402	3.49752e-05	0.998678	0.11945
5	rs6556812	164589870	G	A	64941	0.862283	-0.0809853	0.0203065	3.50473e-05	0.985948	0.137717
10	rs12776784	62858430	C	T	64941	0.983582	-0.217174	0.0544888	3.5146e-05	0.989604	0.0164183
6	rs73353405	4444534	C	G	64941	0.977284	-0.18633	0.0467524	3.51944e-05	0.985279	0.0227156
14	rs74436143	27828461	T	C	64941	0.119383	-0.085359	0.021417	3.52701e-05	0.998277	0.119383
11	rs72905002	33142577	C	T	64941	0.982857	0.231947	0.058228	3.53258e-05	0.843614	0.0171426
3	rs6762554	29581256	C	A	64941	0.967775	-0.156479	0.0392532	3.5331e-05	0.995843	0.0322254
3	rs115675297	45070859	T	A	64941	0.979884	-0.200573	0.0503483	3.53868e-05	0.97077	0.0201158
9	rs7867025	107063674	T	C	64941	0.758178	0.0649216	0.0162933	3.55528e-05	0.987592	0.241822
14	rs10144687	27832788	T	C	64941	0.119369	-0.0853499	0.0214257	3.55957e-05	0.997455	0.119369
6	rs1743973	40094549	T	G	64941	0.729364	0.0623985	0.0156464	3.5613e-05	0.993023	0.270636
14	rs4414411	27828094	A	G	64941	0.119376	-0.0853127	0.021417	3.56144e-05	0.998327	0.119376
14	rs117303200	70886291	A	G	64941	0.971919	-0.179209	0.0449939	3.5625e-05	0.872178	0.0280808
6	rs1721412	40100606	T	G	64941	0.729292	0.0623884	0.0156474	3.57574e-05	0.992737	0.270708
18	rs11875871	51276264	A	G	64941	0.644193	0.0581936	0.0146083	3.57599e-05	0.992952	0.355807
3	rs35378408	62681998	C	A	64941	0.868306	0.0821275	0.0206145	3.57777e-05	0.997073	0.131694
23	rs66532920	105441380	A	G	55863	0.879187	0.0807017	0.0203014	3.57902e-05	0.98715	0.121301
13	rs4942320	44909274	G	A	64941	0.733447	0.0626446	0.0157274	3.58038e-05	0.998779	0.266553
3	rs78498197	29582280	C	T	64941	0.967893	-0.156582	0.0393091	3.58539e-05	0.996234	0.0321069
22	rs141134217	23709851	A	G	64941	0.987991	-0.276176	0.0694091	3.60088e-05	0.842371	0.012009
9	rs2153217	23250588	G	C	64941	0.725622	0.0632703	0.0158906	3.60154e-05	0.960842	0.274378
21	rs386524	15633589	T	C	64941	0.13531	-0.0810789	0.0203643	3.60197e-05	0.998246	0.13531
16	rs8046736	26943239	G	A	64941	0.813508	-0.0749369	0.0188184	3.60659e-05	0.903781	0.186492
6	rs940352	40113614	C	T	64941	0.273732	-0.0622317	0.0156182	3.60939e-05	0.990133	0.273732
10	rs9665728	23538530	A	G	64941	0.493376	-0.0556138	0.0139669	3.61202e-05	0.990121	0.493376
2	rs1370345	211947535	C	A	64941	0.954543	-0.145949	0.0366603	3.61342e-05	0.826838	0.045457
6	rs1923489	40023088	T	C	64941	0.729212	0.062198	0.0156121	3.62663e-05	0.997047	0.270788
19	rs59951593	1213492	T	C	64941	0.917533	-0.110525	0.0277691	3.64184e-05	0.840719	0.0824667
6	rs4714293	40009566	T	C	64941	0.730657	0.0623101	0.0156456	3.64794e-05	0.99593	0.269343
14	rs10141766	27832301	A	G	64941	0.119391	-0.0852099	0.0214199	3.64831e-05	0.997929	0.119391
21	rs412239	15637765	A	T	64941	0.135032	-0.0810944	0.0203863	3.65987e-05	0.997303	0.135032
5	rs116796641	146589714	A	C	64941	0.954267	-0.136271	0.0342619	3.66012e-05	0.939586	0.0457334
13	rs1924590	97421345	C	T	64941	0.395586	0.0567531	0.0142684	3.66882e-05	0.992863	0.395586
15	rs1491176	98353278	G	A	64941	0.472213	-0.0560743	0.0141004	3.67992e-05	0.974927	0.472213
3	rs2028215	62714895	A	T	64941	0.873819	0.083527	0.0210049	3.69867e-05	0.996732	0.126181
14	rs2061263	27833248	T	A	64941	0.119688	-0.0851274	0.0214159	3.69968e-05	0.99624	0.119688
9	rs1407926	10420327	T	C	64941	0.957036	-0.138433	0.034832	3.7077e-05	0.967832	0.0429644
18	rs62098329	51050914	C	A	64941	0.554523	-0.0558069	0.0140427	3.73401e-05	0.987172	0.445477
6	rs17188484	30293585	G	T	64941	0.893009	-0.0890858	0.022421	3.73524e-05	0.998451	0.106991
12	rs10774424	6380357	C	T	64941	0.727064	-0.0642832	0.0161789	3.74143e-05	0.922061	0.272936
10	rs11189049	83025178	G	A	64941	0.774768	0.0661348	0.0166432	3.74166e-05	0.987591	0.225232
6	rs1923466	39965946	A	C	64941	0.718929	0.0616095	0.0154959	3.7494e-05	0.988048	0.281071
6	rs9393131	9250700	A	G	64941	0.370125	-0.0588141	0.0148	3.75086e-05	0.949416	0.370125
10	rs1555802	23538200	A	G	64941	0.493391	-0.0555003	0.0139688	3.75562e-05	0.990006	0.493391
9	rs56321922	8008131	C	T	64941	0.982268	-0.212876	0.0536122	3.76013e-05	0.95185	0.0177324
6	rs28780095	30264624	C	T	64941	0.893038	-0.0890312	0.0224192	3.77091e-05	0.99884	0.106962
3	rs11721041	62692918	A	G	64941	0.868782	0.082036	0.0206522	3.77219e-05	0.996401	0.131218
6	rs28780094	30247081	G	A	64941	0.893009	-0.0889976	0.0224124	3.77615e-05	0.998596	0.106991
10	rs7068031	23539295	G	A	64941	0.493502	-0.0554634	0.0139675	3.79447e-05	0.990083	0.493502
3	rs1851574	57371397	G	A	64941	0.0712558	0.109102	0.0274834	3.80016e-05	0.965097	0.0712557
13	rs4942321	44910022	A	G	64941	0.733885	0.0624652	0.0157366	3.80858e-05	0.999113	0.266115
14	rs4433719	32956802	T	C	64941	0.434661	-0.0558905	0.0140799	3.81097e-05	0.981878	0.434661
3	rs71296792	62703038	C	G	64941	0.868901	0.0819886	0.0206553	3.82071e-05	0.996327	0.131099
3	rs11705978	62702275	T	C	64941	0.868901	0.0819885	0.0206552	3.82077e-05	0.996328	0.131099
14	rs1115691	27833918	C	T	64941	0.119448	-0.0849717	0.0214152	3.82092e-05	0.997799	0.119448
5	rs35621945	117190629	C	G	64941	0.736171	-0.0623673	0.0157157	3.82286e-05	0.995531	0.263829
14	rs1115690	27833878	A	C	64941	0.119448	-0.084969	0.0214152	3.82314e-05	0.997801	0.119448
4	rs76446386	63064320	G	A	64941	0.877175	-0.0839891	0.0211661	3.83872e-05	0.998579	0.122825
4	rs75644991	63064259	T	C	64941	0.877174	-0.0839819	0.021166	3.84444e-05	0.998581	0.122826
4	rs4508922	63063046	A	T	64941	0.877173	-0.0839685	0.0211631	3.84589e-05	0.998836	0.122827
3	rs11709542	62702101	A	T	64941	0.868905	0.081959	0.0206554	3.84596e-05	0.996319	0.131095
6	rs6925661	39995063	T	C	64941	0.758931	0.064547	0.0162602	3.84922e-05	0.994658	0.241069
14	rs4332665	32956825	A	G	64941	0.434651	-0.0558567	0.01408	3.85251e-05	0.981882	0.434651
3	rs11713204	62692784	G	T	64941	0.869398	0.0821417	0.0207039	3.85456e-05	0.995435	0.130602
14	rs10130260	27832695	C	G	64941	0.119575	-0.0849076	0.0214108	3.8589e-05	0.997729	0.119575
4	rs4513599	63064453	A	T	64941	0.87718	-0.0839667	0.0211672	3.86066e-05	0.99851	0.12282
4	rs4464599	63064475	T	C	64941	0.87718	-0.0839662	0.0211672	3.86111e-05	0.998508	0.12282
3	rs35409801	62697574	A	G	64941	0.86943	0.0821206	0.020702	3.86575e-05	0.99568	0.13057
6	rs182434748	28470061	C	T	64941	0.956442	-0.134948	0.0340351	3.86583e-05	0.995937	0.0435577
14	rs10143760	32956292	T	G	64941	0.435144	-0.0558427	0.0140793	3.86616e-05	0.981857	0.435144
14	rs10131652	32956270	G	A	64941	0.435154	-0.0558296	0.0140787	3.87969e-05	0.981908	0.435154
18	rs9948419	71074848	G	A	64941	0.854028	-0.0779466	0.0196587	3.88267e-05	0.996268	0.145972
14	rs10144591	27832696	T	G	64941	0.119607	-0.0848667	0.0214116	3.89462e-05	0.997458	0.119607
5	rs6883473	117229504	G	C	64941	0.614221	-0.0566173	0.0142824	3.89756e-05	0.995769	0.385779
18	rs28873404	51039438	C	T	64941	0.55728	-0.0557351	0.0140589	3.89922e-05	0.984875	0.44272
14	rs10130385	32959242	T	C	64941	0.433849	-0.0559588	0.0141195	3.92043e-05	0.976812	0.433849
6	rs761801	39997176	G	A	64941	0.730692	0.0620776	0.0156507	3.92463e-05	0.99532	0.269308
4	rs7676995	63060963	G	A	64941	0.877167	-0.0838696	0.0211627	3.92628e-05	0.998846	0.122833
6	rs9350201	9250283	C	A	64941	0.370156	-0.0587378	0.0148204	3.93432e-05	0.946892	0.370156
18	rs11661483	50571954	A	G	64941	0.567811	-0.0557481	0.0140668	3.93553e-05	0.988365	0.432189
4	rs17226496	63058080	G	C	64941	0.877712	-0.084032	0.0212076	3.93851e-05	0.999002	0.122288
3	rs35119430	62707174	G	A	64941	0.869346	0.0820831	0.0207147	3.93991e-05	0.994138	0.130654
6	rs56057304	28207991	A	G	64941	0.957065	-0.135689	0.0342595	3.94487e-05	0.995789	0.0429351
9	rs7023789	7117478	C	T	64941	0.553609	0.0556853	0.0140527	3.94553e-05	0.98858	0.446391
18	rs9953611	51414958	C	T	64941	0.492	-0.0551717	0.013927	3.94978e-05	0.994543	0.492
18	rs7506451	50570431	T	A	64941	0.567433	-0.0557529	0.0140716	3.95446e-05	0.987514	0.432567
6	rs148194758	27525198	C	T	64941	0.96929	-0.160641	0.0405685	3.95543e-05	0.98501	0.0307103
3	rs13079973	62693072	T	C	64941	0.869498	0.0822106	0.0207515	3.95646e-05	0.991749	0.130502
9	rs10976045	7117059	A	C	64941	0.553718	0.0556699	0.0140521	3.96212e-05	0.988662	0.446282
13	rs9569268	55864314	G	A	64941	0.714091	0.0624837	0.0157774	3.96853e-05	0.945274	0.285909
3	rs13079812	62693061	T	C	64941	0.869477	0.0821894	0.0207514	3.97417e-05	0.99164	0.130523
14	rs10143778	32956352	T	C	64941	0.435103	-0.0557619	0.0140808	3.97507e-05	0.98167	0.435103
8	rs187437553	132223971	C	G	64941	0.987244	-0.25805	0.065184	3.98452e-05	0.887191	0.0127557
6	rs143813842	27508083	A	G	64941	0.970444	-0.165043	0.0416991	3.98867e-05	0.96641	0.0295563
14	rs4465524	32956680	A	T	64941	0.434662	-0.0557372	0.0140788	3.99632e-05	0.982081	0.434662
6	rs28780093	30242171	A	G	64941	0.892932	-0.0886965	0.0224109	4.00568e-05	0.998761	0.107068
3	rs13068742	62691619	T	A	64941	0.868015	0.0815491	0.0205993	4.00727e-05	0.996538	0.131985
18	rs9960930	51417639	G	C	64941	0.491839	-0.0551034	0.013923	4.01712e-05	0.995239	0.491839

## Sheet: Genetic correlations
phenotype	rg	se	p	N	cohort
Food weight	-0.035	0.105	0.739	51453	UK Biobank
Energy	0.008375	0.1291	0.9483	51453	UK Biobank
Protein	-0.0185	0.1449	0.8984	51453	UK Biobank
Fat	0.08209	0.1287	0.5236	51453	UK Biobank
Carbohydrate	-0.04379	0.1403	0.755	51453	UK Biobank
Saturated fat	0.06948	0.1464	0.6352	51453	UK Biobank
Polyunsaturated fat	0.2257	0.1791	0.2077	51453	UK Biobank
Total sugars	-0.09595	0.1107	0.3862	51453	UK Biobank
Englyst dietary fibre	-0.0745	0.1073	0.4874	51453	UK Biobank
Iron	-0.1492	0.1199	0.2135	51453	UK Biobank
Vitamin B6	-0.07045	0.1346	0.6007	51453	UK Biobank
Vitamin B12	-0.08104	0.3493	0.8165	51453	UK Biobank
Folate	0.02203	0.1153	0.8485	51453	UK Biobank
Vitamin C	-0.2823	0.1318	0.03221	51453	UK Biobank
Potassium	-0.1983	0.1296	0.1261	51453	UK Biobank
Magnesium	-0.15	0.1188	0.2068	51453	UK Biobank
Retinol	0.06201	0.152	0.6833	49890	UK Biobank
Vitamin D	0.2412	0.2445	0.3238	51453	UK Biobank
Starch	0.1616	0.1634	0.3226	51453	UK Biobank
Calcium	-0.03793	0.1208	0.7535	51453	UK Biobank
Vitamin E	-0.09977	0.144	0.4885	51453	UK Biobank
Pulse rate, automated reading	0.08932	0.03992	0.02525	340162	UK Biobank
Ventricular rate	0.06825	0.1315	0.6036	10817	UK Biobank
P duration	-0.06475	0.248	0.7941	10785	UK Biobank
QRS duration	0.04314	0.1977	0.8273	10815	UK Biobank
Bread intake	0.01721	0.04643	0.7109	353030	UK Biobank
Tea intake	0.1577	0.05507	0.004193	349376	UK Biobank
Back pain	0.4934	0.05897	5.868e-17	509000	UK Biobank + CHARGE
Ever smoked	0.2951	0.0836	0.0004152	74053	Tobacco and Genetics Consortium
BMI	0.02733	0.04352	0.53	339224	GIANT Consortium
Height	-0.06831	0.03864	0.0771	253288	GIANT Consortium
Major Depresive Disorder	0.8601	0.06118	6.897e-45	480359	Psychiatric Genomics Consortium
Depression	0.8626	0.05004	1.4e-66	670257	MVP+UKB+FinnGen
Basal Cell Carcinoma	-0.04085	0.03172	0.1978	392871	European
Breast Cancer	0.03563	0.04704	0.4487	228951	BCAC
MVP Cannabis Meta	0.4166	0.05334	5.674e-15	161053	Million Veteran Program, PGC, iPSYCH and MGH
creatinine-based estimated glomerular filtration rate (eGFR)	-0.002382	0.03917	0.9515	1201909	CKDGen Consortium
Urate	0.001886	0.04006	0.9625	457690	CKDGen Consortium (EUR)
cystatin-based estimated glomerular filtration rate (eGFR	-0.09918	0.03334	0.002927	460826	CKDGen Consortium
Blood urea nitrogen	NA	NA	NA	852678	CKDGen Consortium
Gout	0.04238	0.0601	0.4808	457690	CKDGen Consortium (Transethnic)
Chronic kidney disease (CKD)	-0.01784	0.06853	0.7946	480698	CKDGen Consortium (EUR)
urinary albumin-to-creatinine ratio (UACR)	-0.03691	0.04451	0.407	547361	CKDGen Consortium (EUR)
Microalbuminuria	0.01237	0.06312	0.8447	347283	CKDGen Consortium (Transethnic)
Atopic Dermatitis	0.1948	0.06457	0.002547	864982	European individuals
Basal Cell Carcinoma (MTAG)	0.08081	0.04678	0.08406	651138	UKBB+Qskin+eMERGE
Squamous Cell Carcinoma	-0.1199	0.04667	0.01018	635331	UKBB+Qskin+eMERGE
Skin colour	-0.02752	0.0439	0.5307	356530	UK Biobank
Ease of skin tanning	0.03557	0.04705	0.4496	353697	UK Biobank
Childhood sunburn occasions	-0.09202	0.0612	0.1327	269734	UK Biobank
Father's age at death	-0.1715	0.08435	0.04204	266231	UK Biobank
Townsend deprivation index at recruitment	0.4948	0.05977	1.252e-16	360763	UK Biobank
Cancer code, self-reported: squamous cell carcinoma	0.01103	0.2219	0.9603	361141	UK Biobank
Interpolated Age of participant when cancer first diagnosed	-0.5854	0.3443	0.08907	30871	UK Biobank
Sitting height	-0.06008	0.03888	0.1223	360066	UK Biobank
Fluid intelligence score	-0.153	0.04959	0.002032	117131	UK Biobank
Speech-reception-threshold (SRT) estimate (left)	0.2662	0.1005	0.008103	114811	UK Biobank
Speech-reception-threshold (SRT) estimate (right)	0.366	0.1243	0.003231	114720	UK Biobank
Birth weight	-0.09183	0.04964	0.06431	205475	UK Biobank
Mean time to correctly identify matches	-0.02611	0.04848	0.5902	358695	UK Biobank
Cascot confidence score	NA	NA	NA	10509	UK Biobank
Neuroticism score	0.6439	0.05414	1.278e-32	293006	UK Biobank
Forced expiratory volume in 1-second (FEV1), Best measure	-0.1404	0.04801	0.003453	272338	UK Biobank
Forced vital capacity (FVC), Best measure	-0.124	0.04384	0.004681	272338	UK Biobank
Forced expiratory volume in 1-second (FEV1), predicted	-0.07706	0.04228	0.06838	117241	UK Biobank
Forced expiratory volume in 1-second (FEV1), predicted percentage	-0.09453	0.05938	0.1114	117241	UK Biobank
Longest period spent worried or anxious	0.7516	0.3533	0.0334	24738	UK Biobank
Age at first episode of depression	-0.526	0.1227	1.815e-05	61033	UK Biobank
Age at last episode of depression	0.4579	0.1343	0.0006491	59260	UK Biobank
Age when last took cannabis	0.25	0.195	0.1999	25698	UK Biobank
Body mass index (BMI)	0.1299	0.039	0.0008641	359983	UK Biobank
Weight	0.06917	0.0359	0.05399	360116	UK Biobank
Pulse wave Arterial Stiffness index	-0.02884	0.105	0.7836	118469	UK Biobank
Age first had sexual intercourse	-0.3003	0.05201	7.715e-09	317694	UK Biobank
Age hayfever or allergic rhinitis diagnosed by doctor	0.2148	0.1202	0.07402	20904	UK Biobank
Age asthma diagnosed by doctor	0.05602	0.1077	0.6028	11717	UK Biobank
Age started wearing glasses or contact lenses	-0.0346	0.04606	0.4526	310992	UK Biobank
Year ended full time education	-0.3154	0.05839	6.616e-08	91777	UK Biobank
Years of cough on most days	0.3751	0.4555	0.4102	12593	UK Biobank
Age of stopping smoking	0.2155	0.1461	0.1402	33335	UK Biobank
Period spent working mix of day and night shifts	NA	NA	NA	6708	UK Biobank
Number of night shifts worked monthly during mixed shift periods	NA	NA	NA	19998	UK Biobank
Consecutive night shifts during mixed shift periods	-0.3615	0.2571	0.1596	19344	UK Biobank
Frequency of solarium/sunlamp use	-0.1745	0.081	0.03123	340643	UK Biobank
Weight	0.07226	0.03626	0.04626	354838	UK Biobank
Body fat percentage	0.1457	0.03588	4.887e-05	354628	UK Biobank
Whole body fat mass	0.1204	0.03564	0.0007304	354244	UK Biobank
Whole body fat-free mass	-0.006614	0.0376	0.8604	354808	UK Biobank
Whole body water mass	-0.003675	0.03763	0.9222	354834	UK Biobank
Body mass index (BMI)	0.1332	0.03982	0.0008201	354831	UK Biobank
Basal metabolic rate	0.01339	0.03762	0.7219	354825	UK Biobank
Impedance of whole body	-0.02092	0.04123	0.6118	354795	UK Biobank
Impedance of leg (right)	0.05255	0.04025	0.1916	354817	UK Biobank
Impedance of leg (left)	0.05452	0.04041	0.1773	354811	UK Biobank
Impedance of arm (right)	-0.06966	0.04273	0.1031	354792	UK Biobank
Impedance of arm (left)	-0.07771	0.04225	0.06587	354807	UK Biobank
Leg fat percentage (right)	0.2026	0.03857	1.505e-07	354811	UK Biobank
Leg fat mass (right)	0.1488	0.03816	9.603e-05	354807	UK Biobank
Leg fat-free mass (right)	-0.0238	0.03816	0.5328	354798	UK Biobank
Leg predicted mass (right)	-0.02378	0.0382	0.5335	354798	UK Biobank
Leg fat percentage (left)	0.2004	0.03858	2.062e-07	354791	UK Biobank
Leg fat mass (left)	0.1455	0.03819	0.0001396	354788	UK Biobank
Leg fat-free mass (left)	-0.007794	0.03789	0.837	354771	UK Biobank
Leg predicted mass (left)	-0.007778	0.03796	0.8377	354766	UK Biobank
Arm fat percentage (right)	0.1342	0.03785	0.0003932	354760	UK Biobank
Arm fat mass (right)	0.1245	0.03807	0.001073	354736	UK Biobank
Arm fat-free mass (right)	0.02916	0.03852	0.449	354732	UK Biobank
Arm predicted mass (right)	0.02785	0.03862	0.4708	354726	UK Biobank
Arm fat percentage (left)	0.1273	0.03761	0.0007149	354707	UK Biobank
Arm fat mass (left)	0.1233	0.03802	0.001183	354673	UK Biobank
Arm fat-free mass (left)	0.03446	0.0391	0.3781	354668	UK Biobank
Arm predicted mass (left)	0.03902	0.03915	0.3189	354653	UK Biobank
Trunk fat percentage	0.1155	0.03488	0.0009316	354619	UK Biobank
Trunk fat mass	0.1038	0.03444	0.002579	354597	UK Biobank
Trunk fat-free mass	-0.009902	0.03755	0.792	354530	UK Biobank
Trunk predicted mass	-0.01046	0.03767	0.7813	354494	UK Biobank
Nitrogen dioxide air pollution; 2010	0.1463	0.08982	0.1034	356078	UK Biobank
Nitrogen oxides air pollution; 2010	0.2868	0.09518	0.002585	356078	UK Biobank
Particulate matter air pollution (pm10); 2010	0.2354	0.2209	0.2866	329886	UK Biobank
Particulate matter air pollution (pm2.5); 2010	0.4082	0.09435	1.516e-05	329886	UK Biobank
Particulate matter air pollution (pm2.5) absorbance; 2010	0.01913	0.1041	0.8543	329886	UK Biobank
Particulate matter air pollution 2.5-10um; 2010	NA	NA	NA	329886	UK Biobank
Inverse distance to the nearest road	NA	NA	NA	356078	UK Biobank
Inverse distance to the nearest major road	0.361	0.2275	0.1126	356078	UK Biobank
Nitrogen dioxide air pollution; 2005	-0.0183	0.08679	0.833	356078	UK Biobank
Nitrogen dioxide air pollution; 2006	0.01373	0.08931	0.8779	356078	UK Biobank
Nitrogen dioxide air pollution; 2007	-0.04341	0.08529	0.6108	356078	UK Biobank
Particulate matter air pollution (pm10); 2007	-0.04456	0.0953	0.6401	355245	UK Biobank
Average daytime sound level of noise pollution	0.1703	0.1615	0.2918	356078	UK Biobank
Average evening sound level of noise pollution	0.1701	0.1615	0.2921	356078	UK Biobank
Average night-time sound level of noise pollution	0.1703	0.1615	0.2918	356078	UK Biobank
Average 16-hour sound level of noise pollution	0.1703	0.1615	0.2916	356078	UK Biobank
Average 24-hour sound level of noise pollution	0.1702	0.1614	0.2916	356078	UK Biobank
Age at first live birth	-0.3719	0.05914	3.22e-10	131987	UK Biobank
Age at last live birth	-0.2504	0.0708	0.0004054	131806	UK Biobank
Age started oral contraceptive pill	-0.1746	0.06757	0.009756	154112	UK Biobank
Age started smoking in former smokers	-0.253	0.11	0.02143	88898	UK Biobank
Age high blood pressure diagnosed	-0.06218	0.09214	0.4998	87024	UK Biobank
Age diabetes diagnosed	-0.007648	0.2213	0.9724	16166	UK Biobank
White blood cell (leukocyte) count	0.2192	0.04177	1.535e-07	350470	UK Biobank
Red blood cell (erythrocyte) count	0.03934	0.03853	0.3072	350475	UK Biobank
Haemoglobin concentration	0.09972	0.03914	0.01084	350474	UK Biobank
Haematocrit percentage	0.1094	0.03898	0.004997	350475	UK Biobank
Mean corpuscular volume	0.05532	0.03896	0.1556	350473	UK Biobank
Mean corpuscular haemoglobin	0.03566	0.04119	0.3866	350472	UK Biobank
Mean corpuscular haemoglobin concentration	-0.02593	0.05341	0.6274	350468	UK Biobank
Red blood cell (erythrocyte) distribution width	-0.03506	0.04658	0.4516	350473	UK Biobank
Platelet count	-0.0003476	0.03813	0.9927	350474	UK Biobank
Platelet crit	0.02247	0.03724	0.5462	350471	UK Biobank
Mean platelet (thrombocyte) volume	0.03462	0.03729	0.3533	350470	UK Biobank
Platelet distribution width	-0.03007	0.0472	0.5241	350470	UK Biobank
Lymphocyte count	0.2447	0.04902	5.961e-07	349856	UK Biobank
Monocyte count	0.1574	0.05056	0.001854	349856	UK Biobank
Neutrophill count	0.1575	0.04448	0.0004001	349856	UK Biobank
Lymphocyte percentage	0.03327	0.04405	0.4501	349861	UK Biobank
Monocyte percentage	-0.009298	0.04939	0.8507	349861	UK Biobank
Neutrophill percentage	-0.01566	0.04763	0.7423	349861	UK Biobank
Eosinophill percentage	-0.0508	0.04456	0.2542	349861	UK Biobank
Basophill percentage	0.03934	0.05724	0.4919	349861	UK Biobank
Reticulocyte percentage	0.09521	0.05249	0.0697	344728	UK Biobank
Reticulocyte count	0.09775	0.04884	0.04533	344729	UK Biobank
Mean reticulocyte volume	0.01152	0.03665	0.7532	344728	UK Biobank
Mean sphered cell volume	0.01453	0.03685	0.6934	344729	UK Biobank
Immature reticulocyte fraction	0.1352	0.04467	0.002475	344728	UK Biobank
High light scatter reticulocyte percentage	0.1298	0.05034	0.009895	344729	UK Biobank
High light scatter reticulocyte count	0.1294	0.04059	0.001434	344729	UK Biobank
Microalbumin in urine	0.1767	0.1784	0.3218	108706	UK Biobank
Potassium in urine	0.005308	0.06163	0.9314	350053	UK Biobank
Sodium in urine	0.1788	0.05104	0.0004601	350061	UK Biobank
Forced vital capacity (FVC)	-0.1428	0.04408	0.001198	329404	UK Biobank
Forced expiratory volume in 1-second (FEV1)	-0.1563	0.04805	0.001143	329404	UK Biobank
Peak expiratory flow (PEF)	-0.1362	0.05571	0.01451	329404	UK Biobank
Vitamin D (quantile) both_sexes	-0.1635	0.04826	0.0007026	400000	UK Biobank
Ankle spacing width	0.05345	0.03761	0.1553	206589	UK Biobank
Heel Broadband ultrasound attenuation, direct entry	-0.07161	0.05135	0.1631	206576	UK Biobank
Heel quantitative ultrasound index (QUI), direct entry	-0.08309	0.04738	0.07951	206589	UK Biobank
Heel bone mineral density (BMD)	-0.07619	0.04709	0.1057	206496	UK Biobank
Weight, manual entry	-0.2179	0.2252	0.3332	5278	UK Biobank
Age started smoking in current smokers	-0.2716	0.13	0.03678	27291	UK Biobank
Mother's age at death	-0.4115	0.1196	0.0005812	213636	UK Biobank
Age started hormone-replacement therapy (HRT)	-0.2618	0.107	0.01439	68299	UK Biobank
Age at menopause (last menstrual period)	-0.2496	0.05883	2.201e-05	111593	UK Biobank
Age angina diagnosed	0.1561	0.2191	0.4763	10651	UK Biobank
Age hay fever, rhinitis or eczema diagnosed	0.1363	0.07305	0.06206	72232	UK Biobank
Age asthma diagnosed	0.09043	0.09233	0.3274	36955	UK Biobank
Age of primiparous women at birth of child	-0.3503	0.109	0.001306	25545	UK Biobank
Age heart attack diagnosed	-0.1221	0.2285	0.5932	8024	UK Biobank
Number of incorrect matches in round	0.2172	0.04943	1.107e-05	360686	UK Biobank
Time to complete round	0.1047	0.04955	0.03467	354739	UK Biobank
Age at death	-0.009021	0.1924	0.9626	10483	UK Biobank
Age deep-vein thrombosis (DVT, blood clot in leg) diagnosed	0.1883	0.2774	0.4972	6795	UK Biobank
Duration to first press of snap-button in each round	0.005336	0.05005	0.9151	358500	UK Biobank
Age stroke diagnosed	NA	NA	NA	5339	UK Biobank
Diastolic blood pressure, automated reading	0.05112	0.04713	0.2781	340162	UK Biobank
Systolic blood pressure, automated reading	0.02116	0.04277	0.6207	340159	UK Biobank
Ankle spacing width (left)	0.01725	0.04437	0.6975	114630	UK Biobank
Heel broadband ultrasound attenuation (left)	-0.05315	0.05942	0.3711	114625	UK Biobank
Heel quantitative ultrasound index (QUI), direct entry (left)	-0.06724	0.05364	0.21	114630	UK Biobank
Heel bone mineral density (BMD) (left)	-0.06839	0.05381	0.2038	114561	UK Biobank
Heel bone mineral density (BMD) T-score, automated (left)	-0.06725	0.05365	0.21	114630	UK Biobank
Ankle spacing width (right)	0.005656	0.04478	0.8995	114614	UK Biobank
Heel broadband ultrasound attenuation (right)	-0.04441	0.06137	0.4693	114609	UK Biobank
Heel quantitative ultrasound index (QUI), direct entry (right)	-0.05417	0.05538	0.328	114614	UK Biobank
Heel bone mineral density (BMD) (right)	-0.05159	0.05522	0.3502	114552	UK Biobank
Heel bone mineral density (BMD) T-score, automated (right)	-0.05414	0.05538	0.3283	114614	UK Biobank
Pulse rate	0.05552	0.05842	0.3419	118850	UK Biobank
Pulse wave reflection index	0.2712	0.2035	0.1827	118850	UK Biobank
Pulse wave peak to peak time	0.009102	0.1058	0.9315	118787	UK Biobank
Signal-to-noise-ratio (SNR) of triplet (left)	0.3039	0.1036	0.003358	116790	UK Biobank
Signal-to-noise-ratio (SNR) of triplet (right)	0.3962	0.1141	0.0005156	116755	UK Biobank
Mean signal-to-noise ratio (SNR), (right)	NA	NA	NA	116636	UK Biobank
Time to answer	0.1623	0.1054	0.1236	119729	UK Biobank
Duration screen displayed	0.2246	0.06792	0.0009456	119729	UK Biobank
Hand grip strength (left)	-0.04965	0.04082	0.2239	359704	UK Biobank
Longest period of depression	1.155	2.749	0.6744	50664	UK Biobank
Hand grip strength (right)	-0.06369	0.04224	0.1316	359729	UK Biobank
Age cataract diagnosed	-0.1457	0.3256	0.6545	5020	UK Biobank
Waist circumference	0.142	0.03703	0.0001259	360564	UK Biobank
Hip circumference	0.06575	0.03613	0.0688	360521	UK Biobank
Standing height	-0.08665	0.03511	0.01358	360388	UK Biobank
Spherical power (right)	0.05482	0.05214	0.2931	77983	UK Biobank
Spherical power (left)	0.04084	0.0529	0.4401	77739	UK Biobank
Cylindrical power (left)	0.03632	0.1317	0.7827	77739	UK Biobank
Cylindrical power (right)	0.1491	0.1033	0.1489	77983	UK Biobank
Astigmatism angle (right)	0.2456	0.1322	0.06307	77983	UK Biobank
Astigmatism angle (left)	0.0603	0.1283	0.6383	77739	UK Biobank
3mm weak meridian (left)	-0.01623	0.05584	0.7713	75398	UK Biobank
6mm weak meridian (left)	0.006757	0.05738	0.9063	65551	UK Biobank
6mm weak meridian (right)	0.005158	0.05364	0.9234	66256	UK Biobank
3mm asymmetry angle (right)	-0.03156	0.08198	0.7002	74038	UK Biobank
6mm asymmetry angle (right)	0.06326	0.08371	0.4498	41390	UK Biobank
6mm asymmetry angle (left)	0.068	0.1095	0.5348	40683	UK Biobank
3mm asymmetry angle (left)	0.1168	0.08393	0.164	73818	UK Biobank
3mm cylindrical power angle (left)	-0.1028	0.09122	0.2599	75389	UK Biobank
6mm cylindrical power angle (left)	-0.1527	0.1015	0.1324	65529	UK Biobank
6mm cylindrical power angle (right)	0.02127	0.0951	0.823	66237	UK Biobank
3mm cylindrical power angle (right)	-0.07072	0.09349	0.4494	75401	UK Biobank
3mm cylindrical power (right)	-0.08131	0.07653	0.288	75410	UK Biobank
6mm cylindrical power (right)	0.05667	0.1329	0.6698	66256	UK Biobank
6mm cylindrical power (left)	-0.009507	0.101	0.925	65551	UK Biobank
3mm cylindrical power (left)	-0.003419	0.0851	0.9679	75398	UK Biobank
3mm strong meridian (right)	-0.02029	0.05414	0.7079	75410	UK Biobank
6mm strong meridian (right)	-0.004835	0.05399	0.9286	66256	UK Biobank
6mm strong meridian (left)	0.006392	0.05822	0.9126	65551	UK Biobank
3mm strong meridian (left)	-0.01557	0.05708	0.785	75398	UK Biobank
3mm asymmetry index (left)	-0.2965	0.2474	0.2307	73818	UK Biobank
6mm asymmetry index (left)	-0.1183	0.104	0.2552	40683	UK Biobank
6mm asymmetry index (right)	-0.1605	0.1046	0.1249	41390	UK Biobank
3mm asymmetry index (right)	-0.1606	0.1531	0.2941	74038	UK Biobank
3mm regularity index (right)	-0.04864	0.1047	0.6424	74059	UK Biobank
6mm regularity index (right)	-0.1533	0.1237	0.2155	41455	UK Biobank
6mm regularity index (left)	-0.06175	0.1438	0.6676	40700	UK Biobank
3mm regularity index (left)	-0.04125	0.1945	0.8321	73829	UK Biobank
logMAR, final (right)	-0.06091	0.1467	0.678	79293	UK Biobank
logMAR, final (left)	-0.1922	0.158	0.2237	79239	UK Biobank
Intra-ocular pressure, corneal-compensated (right)	-0.03029	0.06917	0.6614	76630	UK Biobank
Intra-ocular pressure, Goldmann-correlated (right)	0.0578	0.05939	0.3304	76630	UK Biobank
Corneal hysteresis (right)	0.1142	0.06428	0.07568	76630	UK Biobank
Corneal resistance factor (right)	0.1193	0.05921	0.04392	76630	UK Biobank
Intra-ocular pressure, corneal-compensated (left)	-0.04868	0.07431	0.5124	76510	UK Biobank
Intra-ocular pressure, Goldmann-correlated (left)	0.01455	0.05918	0.8058	76510	UK Biobank
Corneal hysteresis (left)	0.04696	0.06528	0.4719	76510	UK Biobank
Corneal resistance factor (left)	0.04803	0.05612	0.3921	76510	UK Biobank
Longest period of unenthusiasm / disinterest	NA	NA	NA	32165	UK Biobank
ECG, heart rate	-0.1564	0.09543	0.1013	53777	UK Biobank
ECG, load	-0.6606	0.1443	4.687e-06	53843	UK Biobank
ECG, phase time	-0.7117	0.1591	7.655e-06	53998	UK Biobank
Abdominal aortic aneurysm (AAA) (EUR Biobanks)	0.3023	0.08157	0.0002108	1264918	Global Biobank Meta-analysis Initiative Meta-analysis Initiative: powering genetic discovery across human diseases. 2022
Abdominal aortic aneurysm (AAA) (All Biobanks)	0.2686	0.07556	0.0003776	1455875	Global Biobank Meta-analysis Initiative Meta-analysis Initiative: powering genetic discovery across human diseases. 2023
Acute appendicitis (AcApp) (EUR Biobanks)	0.1978	0.09815	0.0439	1010222	Global Biobank Meta-analysis Initiative Meta-analysis Initiative: powering genetic discovery across human diseases. 2024
Acute appendicitis (AcApp) (All Biobanks)	0.2169	0.09915	0.02874	1108469	Global Biobank Meta-analysis Initiative Meta-analysis Initiative: powering genetic discovery across human diseases. 2025
ADHD	0.51	0.07029	3.983e-13	55374	PGC
Asthma (EUR Biobanks)	0.3402	0.04742	7.263e-13	1376071	Global Biobank Meta-analysis Initiative Meta-analysis Initiative: powering genetic discovery across human diseases. 2026
Asthma (All Biobanks)	0.3171	0.04643	8.473e-12	1800785	Global Biobank Meta-analysis Initiative Meta-analysis Initiative: powering genetic discovery across human diseases. 2027
Alcohol consumed	-0.1634	0.1264	0.1961	51427	UK Biobank
Breakfast cereal consumed	-0.01222	0.1306	0.9254	51427	UK Biobank
Milk added to cereal	-0.08517	0.1349	0.5279	51427	UK Biobank
Type milk consumed: semiskimmed	-0.1006	0.1757	0.567	51427	UK Biobank
Type milk consumed: wholemilk	-0.1484	0.1586	0.3495	51427	UK Biobank
Yogurt/ice-cream consumers	-0.3348	0.1217	0.005963	51427	UK Biobank
Sweet snack consumers	0.003176	0.1752	0.9855	51427	UK Biobank
Starchy food consumers	-0.2874	0.1602	0.07279	51427	UK Biobank
Cheese consumers	-0.1481	0.153	0.333	51427	UK Biobank
Vegetable consumers	-0.4576	0.1692	0.006843	51427	UK Biobank
Fruit consumers	-0.4167	0.1495	0.005317	51427	UK Biobank
Vitamin supplement user	0.05248	0.1554	0.7356	51427	UK Biobank
Invitation to complete online 24-hour recall dietary questionnaire, acceptance	-0.08444	0.06794	0.2139	218234	UK Biobank
Usual side of head for mobile phone use: Left	0.02596	0.1029	0.8007	303009	UK Biobank
Usual side of head for mobile phone use: Right	-0.08908	0.09344	0.3404	303009	UK Biobank
Usual side of head for mobile phone use: Equally left and right	0.1834	0.09668	0.05781	303009	UK Biobank
Snoring	-0.1321	0.052	0.01107	336320	UK Biobank
Milk type used: Full cream	0.09602	0.07806	0.2187	360806	UK Biobank
Milk type used: Semi-skimmed	-0.1102	0.07601	0.147	360806	UK Biobank
Milk type used: Skimmed	-0.1348	0.06736	0.04544	360806	UK Biobank
Milk type used: Soya	0.4416	0.1055	2.842e-05	360806	UK Biobank
Milk type used: Other type of milk	-0.07084	0.2086	0.7342	360806	UK Biobank
Milk type used: Never/rarely have milk	0.1582	0.07823	0.04315	360806	UK Biobank
Spread type: Never/rarely use spread	-0.06099	0.0684	0.3726	360291	UK Biobank
Spread type: Butter/spreadable butter	-0.05736	0.05617	0.3071	360291	UK Biobank
Spread type: Other type of spread/margarine	0.09461	0.0641	0.1399	360291	UK Biobank
Bread type: White	0.1942	0.05431	0.0003507	348424	UK Biobank
Bread type: Brown	-0.08028	0.1011	0.4271	348424	UK Biobank
Bread type: Wholemeal or wholegrain	-0.1889	0.05755	0.001031	348424	UK Biobank
Bread type: Other type of bread	0.1025	0.1519	0.4999	348424	UK Biobank
Cereal type: Bran cereal (e.g. All Bran, Branflakes)	-0.1601	0.1011	0.1135	299898	UK Biobank
Cereal type: Biscuit cereal (e.g. Weetabix)	0.1363	0.09518	0.1523	299898	UK Biobank
Cereal type: Oat cereal (e.g. Ready Brek, porridge)	0.1616	0.07766	0.0375	299898	UK Biobank
Cereal type: Muesli	-0.2029	0.05858	0.0005309	299898	UK Biobank
Cereal type: Other (e.g. Cornflakes, Frosties)	0.1256	0.06994	0.07243	299898	UK Biobank
Coffee type: Decaffeinated coffee (any type)	0.09854	0.09414	0.2952	283449	UK Biobank
Coffee type: Instant coffee	0.04187	0.06448	0.5161	283449	UK Biobank
Coffee type: Ground coffee (include espresso, filter etc)	-0.1164	0.05496	0.03417	283449	UK Biobank
Coffee type: Other type of coffee	0.4318	0.1837	0.01873	283449	UK Biobank
Major dietary changes in the last 5 years: No	-0.4159	0.05979	3.499e-12	360294	UK Biobank
Major dietary changes in the last 5 years: Yes, because of illness	0.4801	0.06223	1.206e-14	360294	UK Biobank
Major dietary changes in the last 5 years: Yes, because of other reasons	0.2519	0.07944	0.001523	360294	UK Biobank
Alcohol usually taken with meals	-0.2284	0.05027	5.515e-06	184716	UK Biobank
Breastfed as a baby	-0.1909	0.08183	0.01968	273743	UK Biobank
Handedness (chirality/laterality): Right-handed	-0.04181	0.1084	0.6998	360913	UK Biobank
Handedness (chirality/laterality): Left-handed	-0.04608	0.09561	0.6299	360913	UK Biobank
Handedness (chirality/laterality): Use both right and left hands equally	0.2747	0.1468	0.06124	360913	UK Biobank
Hair colour (natural, before greying): Blonde	0.03866	0.04398	0.3794	360270	UK Biobank
Hair colour (natural, before greying): Light brown	-0.0659	0.06698	0.3251	360270	UK Biobank
Hair colour (natural, before greying): Dark brown	0.01227	0.04098	0.7647	360270	UK Biobank
Hair colour (natural, before greying): Black	0.01647	0.06036	0.785	360270	UK Biobank
Hair colour (natural, before greying): Other	0.3035	0.1801	0.09195	360270	UK Biobank
Adopted as a child	0.3607	0.1589	0.02315	360450	UK Biobank
Maternal smoking around birth	0.3195	0.05255	1.204e-09	309942	UK Biobank
Father still alive	-0.02917	0.1027	0.7763	351538	UK Biobank
Mother still alive	-0.06826	0.1214	0.574	355029	UK Biobank
Mood swings	0.6404	0.05475	1.299e-31	352604	UK Biobank
Miserableness	0.6625	0.05813	4.32e-30	355182	UK Biobank
Irritability	0.4654	0.05709	3.575e-16	345231	UK Biobank
Sensitivity / hurt feelings	0.4594	0.0561	2.619e-16	350821	UK Biobank
Fed-up feelings	0.5742	0.05591	9.526e-25	353764	UK Biobank
Nervous feelings	0.4798	0.05809	1.465e-16	351829	UK Biobank
Worrier / anxious feelings	0.4083	0.05765	1.412e-12	351833	UK Biobank
Tense / 'highly strung'	0.5794	0.05564	2.152e-25	350159	UK Biobank
Worry too long after embarrassment	0.3485	0.0599	5.927e-09	346527	UK Biobank
Cancer code, self-reported: malignant melanoma	0.05219	0.1217	0.668	361141	UK Biobank
Cancer code, self-reported: basal cell carcinoma	-0.05767	0.09799	0.5562	361141	UK Biobank
Non-cancer illness code, self-reported: hypertension	0.1444	0.04606	0.001717	361141	UK Biobank
Non-cancer illness code, self-reported: peripheral vascular disease	0.3176	0.202	0.1159	361141	UK Biobank
Non-cancer illness code, self-reported: heart attack/myocardial infarction	0.3014	0.07143	2.453e-05	361141	UK Biobank
Non-cancer illness code, self-reported: stroke	0.6519	0.2036	0.001366	361141	UK Biobank
Non-cancer illness code, self-reported: leg claudication/ intermittent claudication	0.07531	0.1353	0.5777	361141	UK Biobank
Non-cancer illness code, self-reported: pulmonary embolism +/- dvt	0.4373	0.1301	0.0007783	361141	UK Biobank
Non-cancer illness code, self-reported: deep venous thrombosis (dvt)	0.2145	0.1054	0.04183	361141	UK Biobank
Non-cancer illness code, self-reported: asthma	0.2182	0.05555	8.575e-05	361141	UK Biobank
Non-cancer illness code, self-reported: chronic obstructive airways disease/copd	0.3409	0.1565	0.02935	361141	UK Biobank
Non-cancer illness code, self-reported: emphysema/chronic bronchitis	0.4071	0.1384	0.003258	361141	UK Biobank
Non-cancer illness code, self-reported: sleep apnoea	0.1396	0.19	0.4627	361141	UK Biobank
Non-cancer illness code, self-reported: other abdominal problem	0.1551	0.2158	0.4724	361141	UK Biobank
Non-cancer illness code, self-reported: gastro-oesophageal reflux (gord) / gastric reflux	0.2368	0.09434	0.01206	361141	UK Biobank
Non-cancer illness code, self-reported: irritable bowel syndrome	0.6384	0.1523	2.771e-05	361141	UK Biobank
Non-cancer illness code, self-reported: cholelithiasis/gall stones	0.3093	0.1054	0.003351	361141	UK Biobank
Non-cancer illness code, self-reported: urinary tract infection/kidney infection	-0.025	0.1496	0.8673	361141	UK Biobank
Non-cancer illness code, self-reported: kidney stone/ureter stone/bladder stone	0.2918	0.1105	0.008266	361141	UK Biobank
Non-cancer illness code, self-reported: urinary frequency / incontinence	0.2701	0.1839	0.1419	361141	UK Biobank
Non-cancer illness code, self-reported: diabetes	0.2072	0.05968	0.0005166	361141	UK Biobank
Non-cancer illness code, self-reported: type 2 diabetes	0.2869	0.1309	0.02842	361141	UK Biobank
Non-cancer illness code, self-reported: hyperthyroidism/thyrotoxicosis	0.02452	0.1263	0.8461	361141	UK Biobank
Non-cancer illness code, self-reported: hypothyroidism/myxoedema	0.1326	0.06629	0.04544	361141	UK Biobank
Non-cancer illness code, self-reported: multiple sclerosis	0.2296	0.1675	0.1704	361141	UK Biobank
Non-cancer illness code, self-reported: head injury	0.3317	0.1846	0.07233	361141	UK Biobank
Non-cancer illness code, self-reported: glaucoma	-0.02857	0.1011	0.7774	361141	UK Biobank
Non-cancer illness code, self-reported: cataract	-0.3136	0.1726	0.06934	361141	UK Biobank
Non-cancer illness code, self-reported: retinal detachment	0.03972	0.1967	0.84	361141	UK Biobank
Non-cancer illness code, self-reported: depression	0.8105	0.08247	8.552e-23	361141	UK Biobank
Non-cancer illness code, self-reported: anxiety/panic attacks	0.6678	0.1485	6.853e-06	361141	UK Biobank
Non-cancer illness code, self-reported: mania/bipolar disorder/manic depression	0.1832	0.1489	0.2184	361141	UK Biobank
Non-cancer illness code, self-reported: back problem	0.5182	0.1726	0.002678	361141	UK Biobank
Non-cancer illness code, self-reported: osteoporosis	0.1625	0.07979	0.04174	361141	UK Biobank
Non-cancer illness code, self-reported: spine arthritis/spondylitis	0.2477	0.1503	0.09938	361141	UK Biobank
Non-cancer illness code, self-reported: iron deficiency anaemia	0.09759	0.145	0.5009	361141	UK Biobank
Non-cancer illness code, self-reported: pernicious anaemia	0.2635	0.1849	0.1542	361141	UK Biobank
Non-cancer illness code, self-reported: sarcoidosis	-0.2007	0.1311	0.1258	361141	UK Biobank
Non-cancer illness code, self-reported: polymyalgia rheumatica	-0.02625	0.1532	0.864	361141	UK Biobank
Non-cancer illness code, self-reported: hayfever/allergic rhinitis	-0.03465	0.07004	0.6208	361141	UK Biobank
Non-cancer illness code, self-reported: pneumonia	0.7139	0.2809	0.01104	361141	UK Biobank
Non-cancer illness code, self-reported: alcohol dependency	0.05425	0.1707	0.7507	361141	UK Biobank
Non-cancer illness code, self-reported: nasal polyps	-0.08823	0.1554	0.5701	361141	UK Biobank
Non-cancer illness code, self-reported: hiv/aids	0.2482	0.1779	0.1629	361141	UK Biobank
Non-cancer illness code, self-reported: helicobacter pylori	0.05909	0.1457	0.6851	361141	UK Biobank
Non-cancer illness code, self-reported: eczema/dermatitis	0.04642	0.1068	0.6638	361141	UK Biobank
Non-cancer illness code, self-reported: psoriasis	0.04634	0.1228	0.7058	361141	UK Biobank
Non-cancer illness code, self-reported: malabsorption/coeliac disease	0.05087	0.1211	0.6744	361141	UK Biobank
Non-cancer illness code, self-reported: diverticular disease/diverticulitis	0.3367	0.08333	5.338e-05	361141	UK Biobank
Non-cancer illness code, self-reported: crohns disease	-0.06914	0.1306	0.5966	361141	UK Biobank
Non-cancer illness code, self-reported: ulcerative colitis	-0.07761	0.1249	0.5345	361141	UK Biobank
Non-cancer illness code, self-reported: rheumatoid arthritis	0.1494	0.1366	0.2739	361141	UK Biobank
Non-cancer illness code, self-reported: osteoarthritis	0.3028	0.06991	1.478e-05	361141	UK Biobank
Non-cancer illness code, self-reported: gout	0.01786	0.06707	0.7901	361141	UK Biobank
Non-cancer illness code, self-reported: atrial fibrillation	-0.0501	0.1383	0.7171	361141	UK Biobank
Non-cancer illness code, self-reported: high cholesterol	0.171	0.05858	0.003518	361141	UK Biobank
Non-cancer illness code, self-reported: hiatus hernia	0.31	0.09764	0.001498	361141	UK Biobank
Non-cancer illness code, self-reported: sciatica	0.2502	0.1506	0.09659	361141	UK Biobank
Non-cancer illness code, self-reported: cervical spondylosis	0.4643	0.1477	0.00167	361141	UK Biobank
Non-cancer illness code, self-reported: chronic fatigue syndrome	0.2662	0.1747	0.1276	361141	UK Biobank
Non-cancer illness code, self-reported: varicose veins	-0.1482	0.1832	0.4186	361141	UK Biobank
Non-cancer illness code, self-reported: unclassifiable	0.503	0.2702	0.06272	361141	UK Biobank
Treatment/medication code: gtn 400micrograms spray	0.4219	0.1747	0.01574	361141	UK Biobank
Treatment/medication code: lisinopril	0.181	0.0919	0.04892	361141	UK Biobank
Treatment/medication code: ramipril	0.08719	0.0814	0.2841	361141	UK Biobank
Treatment/medication code: isosorbide mononitrate	0.1348	0.145	0.3526	361141	UK Biobank
Treatment/medication code: simvastatin	0.1713	0.06071	0.004779	361141	UK Biobank
Treatment/medication code: ventolin 100micrograms inhaler	0.1847	0.0733	0.01174	361141	UK Biobank
Treatment/medication code: serevent 25mcg inhaler	0.4492	0.174	0.009849	361141	UK Biobank
Treatment/medication code: becotide 50 inhaler	0.4638	0.176	0.0084	361141	UK Biobank
Treatment/medication code: beclazone 50 inhaler	-0.09022	0.1467	0.5386	361141	UK Biobank
Treatment/medication code: diazepam	0.6293	0.2198	0.004191	361141	UK Biobank
Treatment/medication code: temazepam	0.366	0.1966	0.06271	361141	UK Biobank
Treatment/medication code: kapake tablet	-0.04944	0.1672	0.7675	361141	UK Biobank
Treatment/medication code: lansoprazole	0.3121	0.09078	0.0005863	361141	UK Biobank
Treatment/medication code: lisinopril+hydrochlorothiazide 10mg/12.5mg tablet	0.1162	0.1856	0.5312	361141	UK Biobank
Treatment/medication code: tramadol	0.3797	0.109	0.0004962	361141	UK Biobank
Treatment/medication code: gaviscon liquid	0.3477	0.2028	0.08641	361141	UK Biobank
Treatment/medication code: omeprazole	0.5582	0.08973	4.97e-10	361141	UK Biobank
Treatment/medication code: bendrofluazide	-0.05412	0.1232	0.6603	361141	UK Biobank
Treatment/medication code: atenolol	0.04712	0.0826	0.5684	361141	UK Biobank
Treatment/medication code: aspirin	0.2973	0.0716	3.294e-05	361141	UK Biobank
Treatment/medication code: calcium salts	-0.08059	0.1769	0.6486	361141	UK Biobank
Treatment/medication code: vitamin b compound tablet	0.4413	0.2158	0.04081	361141	UK Biobank
Treatment/medication code: calcichew d3 tablet	0.1856	0.1489	0.2125	361141	UK Biobank
Treatment/medication code: calcium carbonate+cholecalciferol 1.25g/5micrograms tablet	0.2863	0.1705	0.09305	361141	UK Biobank
Treatment/medication code: ibuprofen	0.4138	0.08801	2.573e-06	361141	UK Biobank
Treatment/medication code: gabapentin	0.3719	0.1588	0.01918	361141	UK Biobank
Treatment/medication code: quinine	0.2206	0.1269	0.08225	361141	UK Biobank
Treatment/medication code: gliclazide	0.09985	0.09732	0.3049	361141	UK Biobank
Treatment/medication code: prednisolone	0.2546	0.1713	0.1372	361141	UK Biobank
Treatment/medication code: allopurinol	0.08809	0.07322	0.2289	361141	UK Biobank
Treatment/medication code: colchicine	0.0389	0.1838	0.8324	361141	UK Biobank
Treatment/medication code: flixonase 50micrograms aqueous nasal spray	-0.06568	0.1443	0.6491	361141	UK Biobank
Treatment/medication code: beconase 50micrograms nasal spray	0.01234	0.2573	0.9618	361141	UK Biobank
Treatment/medication code: rhinocort 50micrograms nasal spray	-0.1203	0.1553	0.4386	361141	UK Biobank
Treatment/medication code: multivitamin+mineral preparations	0.1701	0.2038	0.404	361141	UK Biobank
Treatment/medication code: diclofenac sodium+misoprostol	-0.0675	0.1654	0.6832	361141	UK Biobank
Treatment/medication code: ranitidine	0.5145	0.1344	0.0001289	361141	UK Biobank
Treatment/medication code: fluoxetine	0.8113	0.198	4.181e-05	361141	UK Biobank
Treatment/medication code: amitriptyline	0.3554	0.1078	0.0009823	361141	UK Biobank
Treatment/medication code: bisoprolol	-0.01563	0.1165	0.8933	361141	UK Biobank
Treatment/medication code: doxazosin	0.09902	0.1264	0.4333	361141	UK Biobank
Treatment/medication code: amlodipine	0.008332	0.06891	0.9038	361141	UK Biobank
Treatment/medication code: propranolol	0.3388	0.1527	0.0265	361141	UK Biobank
Treatment/medication code: salbutamol	0.3943	0.1265	0.001827	361141	UK Biobank
Treatment/medication code: insulin product	0.1092	0.1181	0.3551	361141	UK Biobank
Treatment/medication code: cetirizine	0.08113	0.1166	0.4867	361141	UK Biobank
Treatment/medication code: ipratropium	0.3654	0.2233	0.1018	361141	UK Biobank
Treatment/medication code: oxybutynin	0.5047	0.2711	0.06266	361141	UK Biobank
Treatment/medication code: sumatriptan	0.153	0.1686	0.3641	361141	UK Biobank
Treatment/medication code: codeine	0.3259	0.1308	0.01271	361141	UK Biobank
Treatment/medication code: dihydrocodeine	0.4323	0.2329	0.06347	361141	UK Biobank
Treatment/medication code: diclofenac	0.2207	0.1208	0.06753	361141	UK Biobank
Treatment/medication code: thyroxine product	0.169	0.1093	0.1218	361141	UK Biobank
Treatment/medication code: metformin	0.1537	0.06279	0.0144	361141	UK Biobank
Treatment/medication code: warfarin	0.3097	0.142	0.02915	361141	UK Biobank
Treatment/medication code: enalapril	0.06006	0.1344	0.6551	361141	UK Biobank
Treatment/medication code: perindopril	-0.06922	0.1484	0.6409	361141	UK Biobank
Treatment/medication code: flecainide	-0.08191	0.1723	0.6344	361141	UK Biobank
Treatment/medication code: felodipine	-0.06498	0.1684	0.6996	361141	UK Biobank
Treatment/medication code: cod liver oil capsule	-0.4245	0.186	0.02249	361141	UK Biobank
Treatment/medication code: furosemide	0.2057	0.1771	0.2456	361141	UK Biobank
Treatment/medication code: beclometasone	0.0009986	0.1305	0.9939	361141	UK Biobank
Treatment/medication code: sodium cromoglicate	0.2877	0.2272	0.2055	361141	UK Biobank
Treatment/medication code: chlorphenamine	0.1192	0.1555	0.4436	361141	UK Biobank
Treatment/medication code: nicorandil	0.32	0.1895	0.09126	361141	UK Biobank
Treatment/medication code: imigran 50mg tablet	0.2305	0.15	0.1244	361141	UK Biobank
Treatment/medication code: flax oil tablet	0.02716	0.1654	0.8696	361141	UK Biobank
Treatment/medication code: garlic product	0.2548	0.2031	0.2096	361141	UK Biobank
Treatment/medication code: venlafaxine	0.3326	0.1183	0.004924	361141	UK Biobank
Treatment/medication code: losartan	0.1458	0.1246	0.2418	361141	UK Biobank
Treatment/medication code: citalopram	0.7417	0.1547	1.632e-06	361141	UK Biobank
Treatment/medication code: alendronate sodium	0.05279	0.1036	0.6102	361141	UK Biobank
Treatment/medication code: co-codamol	0.453	0.09462	1.687e-06	361141	UK Biobank
Treatment/medication code: movicol oral powder	0.2104	0.2222	0.3436	361141	UK Biobank
Treatment/medication code: salbutamol 100micrograms spacehaler	0.06229	0.1563	0.6903	361141	UK Biobank
Treatment/medication code: arthrotec 50 tablet	-0.2345	0.1887	0.214	361141	UK Biobank
Treatment/medication code: terbinafine	-0.06008	0.1709	0.7252	361141	UK Biobank
Treatment/medication code: pantoprazole	0.2414	0.1682	0.1511	361141	UK Biobank
Treatment/medication code: valsartan	0.4054	0.1371	0.003103	361141	UK Biobank
Treatment/medication code: latanoprost	-0.08092	0.1628	0.6192	361141	UK Biobank
Treatment/medication code: xalatan 0.005% eye drops	-0.07312	0.1087	0.5013	361141	UK Biobank
Treatment/medication code: atorvastatin	0.06149	0.09263	0.5068	361141	UK Biobank
Treatment/medication code: candesartan cilexetil	0.1685	0.09557	0.07795	361141	UK Biobank
Treatment/medication code: salmeterol product	0.08543	0.2134	0.6889	361141	UK Biobank
Treatment/medication code: adcal-d3 1.5g/10micrograms chewable tablet	-0.02007	0.1409	0.8867	361141	UK Biobank
Treatment/medication code: telmisartan	-0.0368	0.1633	0.8217	361141	UK Biobank
Treatment/medication code: clopidogrel	0.4015	0.1723	0.01981	361141	UK Biobank
Treatment/medication code: pioglitazone	0.1077	0.1351	0.4255	361141	UK Biobank
Treatment/medication code: reductil 10mg capsule	0.3027	0.1838	0.09962	361141	UK Biobank
Treatment/medication code: symbicort 100/6 turbohaler	0.2721	0.1457	0.06174	361141	UK Biobank
Treatment/medication code: risedronate sodium	0.03366	0.211	0.8733	361141	UK Biobank
Treatment/medication code: seretide 50 evohaler	0.2162	0.09141	0.01804	361141	UK Biobank
Treatment/medication code: rosiglitazone	0.3265	0.1646	0.04731	361141	UK Biobank
Treatment/medication code: spiriva 18micrograms inhalation capsule	0.04082	0.1775	0.8181	361141	UK Biobank
Treatment/medication code: xalacom 0.005%/0.5% eye drops	0.2653	0.1794	0.1392	361141	UK Biobank
Treatment/medication code: glucosamine product	-0.2447	0.1384	0.0772	361141	UK Biobank
Treatment/medication code: levothyroxine sodium	0.1277	0.07385	0.08367	361141	UK Biobank
Treatment/medication code: rosuvastatin	0.3683	0.1627	0.02359	361141	UK Biobank
Treatment/medication code: ezetimibe	0.2249	0.1299	0.08342	361141	UK Biobank
Treatment/medication code: bendroflumethiazide	0.04831	0.07594	0.5246	361141	UK Biobank
Treatment/medication code: chondroitin product	-0.09474	0.1807	0.6	361141	UK Biobank
Treatment/medication code: omega-3/fish oil supplement	0.4161	0.2133	0.05112	361141	UK Biobank
Treatment/medication code: digoxin	0.1539	0.2164	0.4769	361141	UK Biobank
Treatment/medication code: paracetamol	0.3555	0.06706	1.152e-07	361141	UK Biobank
Treatment/medication code: Free-text entry, unable to be coded	0.468	0.2636	0.07576	361141	UK Biobank
Vitamin and/or mineral supplement use: Fish oil	-0.1139	0.2387	0.6333	51427	UK Biobank
Vitamin and/or mineral supplement use: Glucosamine/chondroitin	0.000306	0.225	0.9989	51427	UK Biobank
Vitamin and/or mineral supplement use: Vitamin C	0.2805	0.1649	0.08879	51427	UK Biobank
Vitamin and/or mineral supplement use: Vitamin E	0.0007429	0.1658	0.9964	51427	UK Biobank
Type of special diet followed: Low calorie	-0.061	0.1153	0.5969	51427	UK Biobank
Type of special diet followed: Other	-0.01144	0.1759	0.9482	51427	UK Biobank
Type of fat/oil used in cooking: Olive oil	-0.3385	0.1567	0.03075	51427	UK Biobank
Type of fat/oil used in cooking: Polyunsaturated margarine	0.2486	0.1904	0.1919	51427	UK Biobank
Size of red wine glass drunk: small (125ml)	-0.02188	0.2036	0.9144	51427	UK Biobank
Suffer from 'nerves'	0.5339	0.06114	2.479e-18	348082	UK Biobank
Illnesses of father: Heart disease	0.2478	0.06354	9.622e-05	318570	UK Biobank
Illnesses of father: Alzheimer's disease/dementia	0.3099	0.1846	0.09312	312666	UK Biobank
Illnesses of father: None of the above (group 1)	-0.3927	0.09921	7.538e-05	314797	UK Biobank
Illnesses of father: None of the above (group 2)	-0.2503	0.1026	0.0147	318545	UK Biobank
Illnesses of father: Parkinson's disease	0.09031	0.1593	0.5707	312104	UK Biobank
Illnesses of father: Severe depression	0.7319	0.1541	2.031e-06	312437	UK Biobank
Illnesses of father: Prostate cancer	-0.08676	0.1088	0.425	312544	UK Biobank
Illnesses of father: Stroke	0.488	0.1829	0.007638	314801	UK Biobank
Illnesses of father: Lung cancer	0.1721	0.07897	0.02932	314072	UK Biobank
Illnesses of father: Chronic bronchitis/emphysema	0.509	0.09611	1.182e-07	314680	UK Biobank
Illnesses of father: High blood pressure	0.1346	0.07652	0.07865	315021	UK Biobank
Illnesses of father: Diabetes	0.05376	0.09991	0.5905	313294	UK Biobank
Illnesses of mother: Heart disease	0.2869	0.08785	0.001094	332966	UK Biobank
Illnesses of mother: Alzheimer's disease/dementia	0.1073	0.1445	0.4577	331041	UK Biobank
Illnesses of mother: None of the above (group 1)	-0.2257	0.07688	0.003323	332611	UK Biobank
Illnesses of mother: None of the above (group 2)	-0.441	0.113	9.522e-05	334401	UK Biobank
Illnesses of mother: Severe depression	0.9105	0.1244	2.546e-13	330653	UK Biobank
Illnesses of mother: Stroke	0.12	0.1254	0.3387	331973	UK Biobank
Illnesses of mother: Lung cancer	0.2781	0.1811	0.1246	330689	UK Biobank
Illnesses of mother: Bowel cancer	-0.06056	0.1543	0.6946	330592	UK Biobank
Illnesses of mother: Breast cancer	-0.07071	0.1083	0.5137	330828	UK Biobank
Illnesses of mother: Chronic bronchitis/emphysema	0.4529	0.1008	7.044e-06	331008	UK Biobank
Illnesses of mother: High blood pressure	0.1043	0.06738	0.1216	333048	UK Biobank
Illnesses of mother: Diabetes	0.1561	0.06917	0.02404	331142	UK Biobank
Illnesses of siblings: Heart disease	0.4713	0.08352	1.676e-08	280784	UK Biobank
Illnesses of siblings: None of the above (group 1)	-0.3481	0.06401	5.387e-08	281979	UK Biobank
Illnesses of siblings: None of the above (group 2)	-0.684	0.104	4.813e-11	284896	UK Biobank
Illnesses of siblings: Severe depression	0.7083	0.09315	2.879e-14	279858	UK Biobank
Illnesses of siblings: Prostate cancer	-0.283	0.235	0.2284	279171	UK Biobank
Illnesses of siblings: Stroke	0.3035	0.1977	0.1247	279577	UK Biobank
Illnesses of siblings: Lung cancer	0.3287	0.2661	0.2168	279301	UK Biobank
Illnesses of siblings: Bowel cancer	0.1367	0.1396	0.3275	279242	UK Biobank
Illnesses of siblings: Breast cancer	0.2503	0.1538	0.1035	279478	UK Biobank
Illnesses of siblings: Chronic bronchitis/emphysema	0.406	0.1416	0.004143	279496	UK Biobank
Illnesses of siblings: High blood pressure	0.1951	0.05891	0.000927	281619	UK Biobank
Illnesses of siblings: Diabetes	0.2163	0.08646	0.01236	280211	UK Biobank
Illnesses of adopted siblings: None of the above (group 2)	0.07808	0.1617	0.6293	1869	UK Biobank
Smoking status: Never	-0.2959	0.04909	1.664e-09	359706	UK Biobank
Smoking status: Previous	0.2481	0.05048	8.895e-07	359706	UK Biobank
Smoking status: Current	0.2725	0.06026	6.105e-06	359706	UK Biobank
Alcohol drinker status: Never	0.2092	0.08764	0.01699	360726	UK Biobank
Alcohol drinker status: Previous	0.4008	0.09211	1.356e-05	360726	UK Biobank
Alcohol drinker status: Current	-0.3608	0.07406	1.11e-06	360726	UK Biobank
Home area population density - urban or rural: Scotland - Large Urban Area	-0.0792	0.1089	0.467	357712	UK Biobank
Home area population density - urban or rural: Scotland - Other Urban Area	0.3918	0.1493	0.008674	357712	UK Biobank
Home area population density - urban or rural: England/Wales - Urban - less sparse	0.2733	0.1335	0.04073	357712	UK Biobank
Home area population density - urban or rural: England/Wales - Hamlet and Isolated Dwelling - less sparse	-0.3195	0.1405	0.02297	357712	UK Biobank
Bipolar and major depression status: No Bipolar or Depression	-0.8352	0.0857	1.944e-22	86895	UK Biobank
Bipolar and major depression status: Bipolar I Disorder	0.3972	0.1975	0.04432	86895	UK Biobank
Bipolar and major depression status: Probable Recurrent major depression (severe)	0.8402	0.1591	1.278e-07	86895	UK Biobank
Bipolar and major depression status: Probable Recurrent major depression (moderate)	0.7874	0.1383	1.236e-08	86895	UK Biobank
Reproduciblity of spirometry measurement using ERS/ATS criteria	-0.02348	0.1048	0.8228	272338	UK Biobank
Ever smoked	0.2476	0.0468	1.224e-07	359751	UK Biobank
Loneliness, isolation	0.6815	0.06332	5.16e-27	355583	UK Biobank
Guilty feelings	0.5042	0.06205	4.425e-16	351907	UK Biobank
Risk taking	0.1491	0.05624	0.007999	348549	UK Biobank
Ever addicted to any substance or behaviour	0.6925	0.1656	2.877e-05	116746	UK Biobank
Ever had known person concerned about, or recommend reduction of, alcohol consumption: No	-0.4142	0.1123	0.0002251	117880	UK Biobank
Ever had known person concerned about, or recommend reduction of, alcohol consumption: Yes, but not in the last year	0.628	0.1502	2.914e-05	117880	UK Biobank
Ever had known person concerned about, or recommend reduction of, alcohol consumption: Yes, during the last year	0.05239	0.1192	0.6602	117880	UK Biobank
Ever addicted to alcohol	0.03799	0.1732	0.8264	6514	UK Biobank
Ever been injured or injured someone else through drinking alcohol: No	-0.4621	0.1798	0.01015	118002	UK Biobank
Tense, sore, or aching muscles during worst period of anxiety	0.5819	0.1316	9.72e-06	33301	UK Biobank
Difficulty concentrating during worst period of anxiety	0.3333	0.242	0.1684	34879	UK Biobank
Ever felt worried, tense, or anxious for most of a month or longer	0.6428	0.08351	1.394e-14	110315	UK Biobank
More irritable than usual during worst period of anxiety	0.5383	0.1766	0.002303	33425	UK Biobank
Ever worried more than most people would in similar situation	0.7208	0.09009	1.237e-15	98990	UK Biobank
Restless during period of worst anxiety	0.2459	0.1993	0.2173	33864	UK Biobank
Frequent trouble falling or staying asleep during worst period of anxiety	0.06272	0.1456	0.6667	35584	UK Biobank
Professional informed about anxiety	0.637	0.1479	1.654e-05	36366	UK Biobank
Easily tired during worst period of anxiety	0.6132	0.1734	0.0004055	34121	UK Biobank
Difficulty concentrating during worst depression	0.6633	0.1391	1.848e-06	58750	UK Biobank
Thoughts of death during worst depression	0.3919	0.1448	0.006797	62648	UK Biobank
Ever had prolonged loss of interest in normal activities	0.7122	0.07505	2.323e-21	117727	UK Biobank
Ever had prolonged feelings of sadness or depression	0.7946	0.08905	4.549e-19	117763	UK Biobank
Depression possibly related to stressful or traumatic event	-0.2581	0.1784	0.148	66334	UK Biobank
Professional informed about depression	0.6648	0.1159	9.703e-09	66302	UK Biobank
Feelings of tiredness during worst episode of depression	0.5632	0.1501	0.0001748	59774	UK Biobank
Feelings of worthlessness during worst period of depression	0.4632	0.1182	8.917e-05	62128	UK Biobank
Ever heard an un-real voice	0.4782	0.1533	0.001811	117503	UK Biobank
Ever seen an un-real vision	0.4168	0.1875	0.02621	116787	UK Biobank
Ever self-harmed	0.7794	0.1292	1.599e-09	117733	UK Biobank
Severity of problems due to mania or irritability	0.2401	0.1119	0.03191	26655	UK Biobank
Ever sought or received professional help for mental distress	0.8478	0.07401	2.233e-30	117677	UK Biobank
Ever suffered mental distress preventing usual activities	0.9113	0.0865	5.959e-26	116527	UK Biobank
Ever had period of mania / excitability	0.6714	0.1386	1.262e-06	115338	UK Biobank
Ever had period extreme irritability	0.6847	0.08188	6.111e-17	114422	UK Biobank
Been in serious accident believed to be life-threatening	0.704	0.1617	1.345e-05	117922	UK Biobank
Been involved in combat or exposed to war-zone	0.3439	0.1446	0.01739	117954	UK Biobank
Diagnosed with life-threatening illness	0.2883	0.1178	0.0144	117617	UK Biobank
Victim of physically violent crime	0.4099	0.1043	8.476e-05	117846	UK Biobank
Witnessed sudden violent death	0.2559	0.1146	0.02555	117862	UK Biobank
Victim of sexual assault	0.5665	0.09549	2.974e-09	116671	UK Biobank
Did your sleep change?	0.5796	0.1945	0.002877	57086	UK Biobank
Trouble falling asleep	-0.01561	0.142	0.9124	45540	UK Biobank
Sleeping too much	0.6624	0.1446	4.607e-06	45540	UK Biobank
Waking too early	-0.3115	0.1157	0.007107	45540	UK Biobank
Weight change during worst episode of depression: Stayed about the same or was on a diet	-0.1905	0.09537	0.04574	56571	UK Biobank
Weight change during worst episode of depression: Gained weight	0.4409	0.1267	0.0005026	56571	UK Biobank
Weight change during worst episode of depression: Lost weight	-0.09224	0.1311	0.4818	56571	UK Biobank
Difficulty stopping worrying during worst period of anxiety	0.5882	0.2177	0.006889	35523	UK Biobank
Number of things worried about during worst period of anxiety	0.6506	0.1779	0.0002548	35558	UK Biobank
Mental health problems ever diagnosed by a professional: Social anxiety or social phobia	0.7397	0.1948	0.0001467	117716	UK Biobank
Mental health problems ever diagnosed by a professional: Depression	0.9585	0.08253	3.52e-31	117782	UK Biobank
Mental health problems ever diagnosed by a professional: Anxiety, nerves or generalized anxiety disorder	0.744	0.09774	2.699e-14	117751	UK Biobank
Mental health problems ever diagnosed by a professional: Panic attacks	0.6522	0.1221	9.18e-08	117722	UK Biobank
Mental health problems ever diagnosed by a professional: Obsessive compulsive disorder (OCD)	0.479	0.2304	0.03766	117711	UK Biobank
Substances taken for depression: Unprescribed medication (more than once)	0.5261	0.1965	0.007421	117763	UK Biobank
Substances taken for depression: Medication prescribed to you (for at least two weeks)	0.8743	0.08322	8.101e-26	117763	UK Biobank
Substances taken for depression: Drugs or alcohol (more than once)	0.6505	0.1217	9.056e-08	117763	UK Biobank
Activities undertaken to treat depression: Talking therapies, such as psychotherapy, counselling, group therapy or CBT	0.7772	0.0823	3.605e-21	117763	UK Biobank
Activities undertaken to treat depression: Other therapeutic activities such as mindfulness, yoga or art classes	0.4507	0.09568	2.468e-06	117763	UK Biobank
Manifestations of mania or irritability: I was more talkative than usual	0.6801	0.1157	4.122e-09	114422	UK Biobank
Manifestations of mania or irritability: I was more restless than usual	0.6828	0.1024	2.588e-11	114422	UK Biobank
Manifestations of mania or irritability: My thoughts were racing	0.6546	0.1243	1.406e-07	114422	UK Biobank
Manifestations of mania or irritability: I needed less sleep than usual	0.5996	0.1585	0.0001548	114422	UK Biobank
Manifestations of mania or irritability: I was more creative or had more ideas than usual	0.4973	0.1639	0.002418	114422	UK Biobank
Manifestations of mania or irritability: I was easily distracted	0.7439	0.1342	2.946e-08	114422	UK Biobank
Manifestations of mania or irritability: I was more active than usual	0.5591	0.1265	9.944e-06	114422	UK Biobank
Substances taken for anxiety: Medication prescribed to you (for at least two weeks)	0.8888	0.09601	2.099e-20	98990	UK Biobank
Substances taken for anxiety: Drugs or alcohol (more than once)	0.785	0.1925	4.542e-05	98990	UK Biobank
Activities undertaken to treat anxiety: Talking therapies, such as psychotherapy, counselling, group therapy or CBT	0.759	0.09407	7.158e-16	98990	UK Biobank
Activities undertaken to treat anxiety: Other therapeutic activities such as mindfulness, yoga or art classes	0.3579	0.1065	0.0007822	98990	UK Biobank
Methods of self-harm used: Ingesting a medication in excess of the normal dose	0.7672	0.1599	1.601e-06	117733	UK Biobank
Actions taken following self-harm: See anyone from psychiatric or mental health services, including liaison services	0.5687	0.1699	0.0008163	117733	UK Biobank
Seen doctor (GP) for nerves, anxiety, tension or depression	0.8289	0.05829	6.951e-46	358693	UK Biobank
Seen a psychiatrist for nerves, anxiety, tension or depression	0.8235	0.06742	2.56e-34	359535	UK Biobank
Answered sexual history questions	-0.01313	0.05443	0.8094	361015	UK Biobank
Ever had same-sex intercourse	0.384	0.1034	0.0002039	326849	UK Biobank
Long-standing illness, disability or infirmity	0.5963	0.05503	2.336e-27	352798	UK Biobank
Wears glasses or contact lenses	0.09962	0.06937	0.151	360677	UK Biobank
Doctor diagnosed hayfever or allergic rhinitis	0.2497	0.08112	0.002079	91787	UK Biobank
Doctor diagnosed asthma	0.3169	0.08766	0.0002999	91787	UK Biobank
Doctor diagnosed sarcoidosis	-0.1793	0.1621	0.2689	91787	UK Biobank
Other eye problems	0.3927	0.1035	0.000148	360134	UK Biobank
Hearing difficulty/problems: No	-0.299	0.05514	5.894e-08	346635	UK Biobank
Hearing difficulty/problems: Yes	0.2999	0.05524	5.654e-08	346635	UK Biobank
Cough on most days	0.4623	0.0984	2.622e-06	91787	UK Biobank
Bring up phlegm/sputum/mucus on most days	0.5242	0.1286	4.602e-05	91787	UK Biobank
Tobacco smoking: Occasionally	-0.4212	0.2118	0.04674	91353	UK Biobank
Tobacco smoking: Ex-smoker	0.2843	0.07566	0.0001715	91353	UK Biobank
Tobacco smoking: Never smoked	-0.2617	0.0721	0.0002837	91353	UK Biobank
Hearing difficulty/problems with background noise	0.4211	0.05255	1.11e-15	353983	UK Biobank
Job coding: residential manager, day care manager, nursing home manager, retirement home manager, convalescent home manager	0.06525	0.181	0.7184	89866	UK Biobank
Job coding: restaurant or catering manager, restaurateur; canteen manager; takeaway food shop manager	-0.06022	0.1697	0.7227	89866	UK Biobank
Job coding: chemist (analytic, developmental, industrial, research)	-0.05901	0.2021	0.7703	89866	UK Biobank
Job coding: biologist, botanist, entomologist, zoologist, ecologist, microbiologist/pathologist/virologist/geneticist (not medically qualified)	-0.1309	0.1991	0.5109	89866	UK Biobank
Job coding: physicist, astronomer, geologist, geophysicist, meteorologist, oceanographer, seismologist	-0.1466	0.1549	0.3439	89866	UK Biobank
Job coding: mathematician	0.4409	0.205	0.03148	89866	UK Biobank
Job coding: civil engineer	-0.2973	0.1724	0.0847	89866	UK Biobank
Job coding: software professional, analyst-programmer, computer programmer, software analyst or engineer, systems designer or programmer	-0.2198	0.2017	0.2758	89866	UK Biobank
Job coding: medical doctor, general practitioner, hospital consultant	-0.07138	0.1006	0.4779	89866	UK Biobank
Job coding: higher education teaching professional, university lecturer/professor (including college/university head/vice chancellor)	-0.1549	0.1313	0.2382	89866	UK Biobank
Job coding: secondary school teacher or teaching professional (including head teacher)	-0.1178	0.122	0.3345	89866	UK Biobank
Job coding: primary /junior school teacher or teaching professional, nursery school teacher (including head teacher)	-0.05263	0.1508	0.727	89866	UK Biobank
Job coding: scientific researcher, scientific officer, medical research associate, experimental officer	0.01802	0.1443	0.9006	89866	UK Biobank
Job coding: researcher in broadcasting, journalism, photography, printing and publishing	0.153	0.1326	0.2486	89866	UK Biobank
Job coding: town planner, development officer	0.03921	0.1649	0.812	89866	UK Biobank
Job coding: civil service senior manager outside the senior civil service (former grades 6 and 7)	-0.1677	0.1446	0.2464	89866	UK Biobank
Job coding: nurse (of any kind, at any level)	0.07298	0.14	0.6023	89866	UK Biobank
Job coding: non-commissioned officers or other rank of armed forces	0.4101	0.1506	0.006478	89866	UK Biobank
Job coding: author, writer, biographer, book editor, novelist, dramatist, playwright, poet	-0.05066	0.1857	0.785	89866	UK Biobank
Job coding: journalist, reporter, newspaper correspondent, sports writer, newspaper or magazine editor	-0.2928	0.1662	0.07809	89866	UK Biobank
Job coding: ship's engineer, ship's purser	-0.3585	0.1993	0.07213	89866	UK Biobank
Job coding: management information officer, conference/events co-ordinator/organiser, exhibition officer, work study engineer/officer/analyst, contract adviser/agent, election agent, business system analyst	0.2487	0.1613	0.1232	89866	UK Biobank
Job coding: officer of ngo, trade union organiser/official, charity administrator, secretary of research or charity or political or professional or trade association or trade union	0.1345	0.1591	0.3976	89866	UK Biobank
Job coding: general office assistant/clerk, clerical officer, clerk-typist, office supervisor, press/newspaper corrector/reader	0.3453	0.2694	0.2	89866	UK Biobank
Job coding: all other personal assistants and secretaries	0.1846	0.1436	0.1986	89866	UK Biobank
Job coding: receptionist, doctor's/dental receptionist	0.06768	0.1863	0.7164	89866	UK Biobank
Job coding: houseparent, child careworker, residential warden, sheltered accommodation warden, foster parent	-0.003133	0.1318	0.981	89866	UK Biobank
Job coding: machine operator, processor, foreman	0.01203	0.1386	0.9309	89866	UK Biobank
Job coding: assembler, machine operator, foreman	0.275	0.2102	0.1907	89866	UK Biobank
Job coding: heavy goods vehicle (hgv) driver, lorry or truck driver, tanker driver, haulage driver	0.2807	0.1889	0.1372	89866	UK Biobank
Job coding: driving instructor, hgv instructor	0.09618	0.2176	0.6585	89866	UK Biobank
Job coding: other general office clerical tasks including: office junior, office worker, photocopy/print room operator, office machinist	0.3225	0.1547	0.0371	89866	UK Biobank
Work hours - lumped category: Over 40 hours	0.04007	0.1488	0.7877	75177	UK Biobank
Workplace very noisy: Rarely/never	-0.04669	0.1145	0.6834	90897	UK Biobank
Workplace very noisy: Sometimes	0.3193	0.1548	0.03922	90777	UK Biobank
Workplace very noisy: Often	0.4955	0.09296	9.811e-08	90653	UK Biobank
Workplace very cold: Rarely/never	-0.3654	0.1059	0.0005579	90696	UK Biobank
Workplace very cold: Sometimes	0.355	0.1093	0.001162	90500	UK Biobank
Workplace very cold: Often	0.5233	0.1167	7.287e-06	90188	UK Biobank
Workplace very hot: Rarely/never	-0.1448	0.1076	0.1785	90644	UK Biobank
Workplace very hot: Sometimes	0.2387	0.1264	0.05894	90544	UK Biobank
Workplace very hot: Often	0.4785	0.1245	0.0001206	90165	UK Biobank
Workplace very dusty: Sometimes	0.5299	0.1549	0.0006251	89965	UK Biobank
Workplace very dusty: Often	0.4826	0.1074	7.078e-06	89631	UK Biobank
Workplace full of chemical or other fumes: Rarely/never	-0.1838	0.1333	0.168	90344	UK Biobank
Workplace full of chemical or other fumes: Sometimes	0.4652	0.1373	0.000705	89060	UK Biobank
Workplace full of chemical or other fumes: Often	0.6969	0.1742	6.34e-05	88735	UK Biobank
Workplace had a lot of cigarette smoke from other people smoking: Rarely/never	-0.2084	0.1887	0.2694	90716	UK Biobank
Workplace had a lot of cigarette smoke from other people smoking: Sometimes	0.3285	0.1701	0.05343	90168	UK Biobank
Workplace had a lot of cigarette smoke from other people smoking: Often	0.6335	0.1395	5.605e-06	89803	UK Biobank
Worked with materials containing asbestos: Rarely/never	-0.1273	0.1944	0.5127	85668	UK Biobank
Worked with materials containing asbestos: Sometimes	0.3415	0.1348	0.01131	77361	UK Biobank
Worked with materials containing asbestos: Often	0.1123	0.1422	0.4299	76457	UK Biobank
Worked with paints, thinners or glues: Rarely/never	-0.1117	0.1484	0.4514	90389	UK Biobank
Worked with paints, thinners or glues: Sometimes	0.5472	0.1249	1.192e-05	89003	UK Biobank
Worked with paints, thinners or glues: Often	0.3801	0.1767	0.03143	88718	UK Biobank
Workplace had a lot of diesel exhaust: Sometimes	0.4925	0.1318	0.0001872	89310	UK Biobank
Workplace had a lot of diesel exhaust: Often	0.4726	0.1653	0.004242	89104	UK Biobank
Breathing problems during period of job: No	-0.1846	0.1296	0.1543	91149	UK Biobank
Breathing problems during period of job: Yes	0.6146	0.1274	1.403e-06	91149	UK Biobank
Job SOC coding: Conference and exhibition managers	-0.03813	0.1706	0.8232	91149	UK Biobank
Job SOC coding: Chemists	-0.03758	0.1849	0.8389	91149	UK Biobank
Job SOC coding: Biological scientists and biochemists	-0.06671	0.1531	0.663	91149	UK Biobank
Job SOC coding: Physicists, geologists and meteorologists	0.009017	0.1179	0.939	91149	UK Biobank
Job SOC coding: Software professionals	-0.2006	0.1907	0.2927	91149	UK Biobank
Job SOC coding: Medical practitioners	-0.06076	0.1027	0.5541	91149	UK Biobank
Job SOC coding: Higher education teaching professionals	-0.1723	0.1323	0.1928	91149	UK Biobank
Job SOC coding: Secondary education teaching professionals	-0.1412	0.121	0.2433	91149	UK Biobank
Job SOC coding: Primary and nursery education teaching professionals	-0.05907	0.1549	0.703	91149	UK Biobank
Job SOC coding: Scientific researchers	0.01071	0.1375	0.9379	91149	UK Biobank
Job SOC coding: Researchers n.e.c.	-0.01875	0.1535	0.9028	91149	UK Biobank
Job SOC coding: Town planners	0.03801	0.1757	0.8287	91149	UK Biobank
Job SOC coding: Public service administrative professionals	-0.1891	0.1531	0.2168	91149	UK Biobank
Job SOC coding: Nurses	0.08464	0.1407	0.5475	91149	UK Biobank
Job SOC coding: Occupational therapists	0.1841	0.1855	0.321	91149	UK Biobank
Job SOC coding: NCOs and other ranks	0.4175	0.1583	0.008351	91149	UK Biobank
Job SOC coding: Authors, writers	-0.0723	0.1844	0.695	91149	UK Biobank
Job SOC coding: Journalists, newspaper and periodical editors	-0.3131	0.1584	0.04811	91149	UK Biobank
Job SOC coding: Ship and hovercraft officers	-0.272	0.1841	0.1396	91149	UK Biobank
Job SOC coding: Business and related associate professionals n.e.c.	0.2651	0.167	0.1125	91149	UK Biobank
Job SOC coding: Officers of non-governmental organisations	0.1364	0.156	0.3821	91149	UK Biobank
Job SOC coding: General office assistants/clerks	0.2963	0.2556	0.2463	91149	UK Biobank
Job SOC coding: Personal assistants and other secretaries	0.1542	0.133	0.2465	91149	UK Biobank
Job SOC coding: Receptionists	0.1325	0.181	0.4642	91149	UK Biobank
Job SOC coding: Houseparents and residential wardens	0.004639	0.1354	0.9727	91149	UK Biobank
Job SOC coding: Care assistants and home carers	0.1892	0.1833	0.3019	91149	UK Biobank
Job SOC coding: Food, drink and tobacco process operatives	0.04265	0.1411	0.7625	91149	UK Biobank
Job SOC coding: Heavy goods vehicle drivers	0.306	0.1933	0.1135	91149	UK Biobank
Job SOC coding: Driving instructors	0.07356	0.1932	0.7034	91149	UK Biobank
Job SOC coding: Labourers in building and woodworking trades	0.4189	0.2624	0.1104	91149	UK Biobank
Job SOC coding: Other goods handling and storage occupations n.e.c.	0.2304	0.2316	0.3198	91149	UK Biobank
Job SOC coding: Elementary office occupations n.e.c.	0.2731	0.1518	0.07201	91149	UK Biobank
Breathing problems improved/stopped away from workplace or on holiday: No	0.546	0.1532	0.0003656	91149	UK Biobank
Breathing problems improved/stopped away from workplace or on holiday: Yes	0.6845	0.1655	3.52e-05	91149	UK Biobank
Breathing problems responsible for leaving job: No	0.4673	0.1241	0.0001674	91149	UK Biobank
Job involved shift work: Yes	0.4099	0.1051	9.599e-05	91149	UK Biobank
Night shifts worked: This type of shift pattern was not worked during job	-0.1839	0.1773	0.2998	25697	UK Biobank
Gap coding: Full-time or part-time education	0.1184	0.1513	0.4341	68899	UK Biobank
Gap coding: Looking after the home and/or family	0.1834	0.1582	0.2464	69370	UK Biobank
Gap coding: Unable to work due to sickness or disability	0.5588	0.1919	0.003599	67892	UK Biobank
Wheeze or whistling in the chest in last year	0.3933	0.0558	1.819e-12	354523	UK Biobank
Chest pain or discomfort	0.5998	0.06743	5.817e-19	357507	UK Biobank
Ever had bowel cancer screening	0.1947	0.08435	0.02101	355353	UK Biobank
Ever had prostate specific antigen (PSA) test	-0.1042	0.0877	0.2348	158108	UK Biobank
Hair/balding pattern: Pattern 1	-0.0519	0.04618	0.2611	165649	UK Biobank
Hair/balding pattern: Pattern 2	0.03207	0.06563	0.6251	165649	UK Biobank
Hair/balding pattern: Pattern 3	-0.00118	0.06506	0.9855	165649	UK Biobank
Hair/balding pattern: Pattern 4	0.03578	0.04527	0.4293	165649	UK Biobank
Had major operations	0.3013	0.0965	0.001794	165737	UK Biobank
Diabetes diagnosed by doctor	0.2138	0.05549	0.0001168	360192	UK Biobank
Cancer diagnosed by doctor	0.08024	0.1335	0.5478	359981	UK Biobank
Fractured/broken bones in last 5 years	0.2177	0.07487	0.003635	359241	UK Biobank
Other serious medical condition/disability diagnosed by doctor	0.435	0.06962	4.15e-10	354588	UK Biobank
Taking other prescription medications	0.5016	0.0585	9.926e-18	360027	UK Biobank
Light smokers, at least 100 smokes in lifetime	0.1083	0.07611	0.1547	97021	UK Biobank
Non-butter spread type details: Flora Pro-Active or Benecol	-0.03412	0.1102	0.7569	190094	UK Biobank
Non-butter spread type details: Soft (tub) margarine	0.1334	0.0795	0.09329	190094	UK Biobank
Non-butter spread type details: Olive oil based spread (eg: Bertolli)	-0.04655	0.1109	0.6748	190094	UK Biobank
Non-butter spread type details: Polyunsaturated/sunflower oil based spread (eg: Flora)	-0.1441	0.1522	0.3435	190094	UK Biobank
Non-butter spread type details: Other low or reduced fat spread	0.1786	0.1147	0.1193	190094	UK Biobank
Reason for reducing amount of alcohol drunk: Illness or ill health	0.4334	0.1663	0.009185	134033	UK Biobank
Reason for reducing amount of alcohol drunk: Health precaution	0.08618	0.07282	0.2367	134033	UK Biobank
Reason for reducing amount of alcohol drunk: Financial reasons	0.01859	0.1199	0.8768	134033	UK Biobank
Reason for reducing amount of alcohol drunk: Other reason	-0.2181	0.07992	0.006349	134033	UK Biobank
Had menopause	0.1061	0.08074	0.1888	163184	UK Biobank
Ever used hormone-replacement therapy (HRT)	0.3587	0.06816	1.416e-07	193606	UK Biobank
Bilateral oophorectomy (both ovaries removed)	0.3973	0.08704	5.015e-06	191515	UK Biobank
Had other major operations	0.4365	0.08879	8.835e-07	192470	UK Biobank
Type of tobacco previously smoked: Manufactured cigarettes	-0.03209	0.1566	0.8376	89224	UK Biobank
Type of tobacco previously smoked: Cigars or pipes	-0.2184	0.1821	0.2304	89224	UK Biobank
Ever stopped smoking for 6+ months	0.269	0.1369	0.04947	87937	UK Biobank
Started insulin within one year diagnosis of diabetes	-0.1739	0.1837	0.3438	16415	UK Biobank
Fracture resulting from simple fall	0.2322	0.1428	0.1038	34310	UK Biobank
Used an inhaler for chest within last hour	0.1756	0.1535	0.2528	331625	UK Biobank
Hearing aid user	0.2924	0.1131	0.009708	219358	UK Biobank
Neck/shoulder pain for 3+ months	0.5089	0.1746	0.003555	81276	UK Biobank
Back pain for 3+ months	0.3333	0.1061	0.00168	90555	UK Biobank
Ever had hysterectomy (womb removed)	0.2104	0.1132	0.06311	171413	UK Biobank
Chest pain or discomfort walking normally	0.245	0.09308	0.008498	55737	UK Biobank
Former alcohol drinker	0.1266	0.121	0.2953	23745	UK Biobank
Stomach/abdominal pain for 3+ months	0.3477	0.3831	0.364	29747	UK Biobank
Chest pain or discomfort when walking uphill or hurrying	0.2156	0.142	0.1289	44867	UK Biobank
Knee pain for 3+ months	0.3132	0.1317	0.01741	76000	UK Biobank
Headaches for 3+ months	0.2098	0.0874	0.01637	70181	UK Biobank
Underlying (primary) cause of death: ICD10: C34.9 Bronchus or lung, unspecified	0.05306	0.1504	0.7242	9092	UK Biobank
Underlying (primary) cause of death: ICD10: C45.9 Mesothelioma, unspecified	-0.03091	0.1746	0.8595	9092	UK Biobank
Underlying (primary) cause of death: ICD10: J84.1 Other interstitial pulmonary diseases with fibrosis	-0.4725	0.1945	0.01512	9092	UK Biobank
Detention categories: Informal, not formally detained	0.3506	0.1206	0.003636	361194	UK Biobank
Hospital episode type: General episode	0.358	0.07632	2.725e-06	361194	UK Biobank
Destinations on discharge from hospital (recoded): Usual Place of residence	0.4172	0.06752	6.45e-10	361058	UK Biobank
Destinations on discharge from hospital (recoded): Usual Place of residence: Living with relatives	0.1943	0.1426	0.1729	359439	UK Biobank
Destinations on discharge from hospital (recoded): Transfer to other NHS provider	0.2312	0.122	0.05809	359437	UK Biobank
Destinations on discharge from hospital (recoded): Transfer to other NHS provider: General ward, young physically disabled, A&E	0.532	0.2203	0.01572	359670	UK Biobank
Number of attempts	0.1504	0.07109	0.03438	119729	UK Biobank
Final attempt correct: no	0.08449	0.1104	0.444	119729	UK Biobank
Final attempt correct: yes	-0.09414	0.1086	0.3859	119729	UK Biobank
Non-accidental death in close genetic family	0.06315	0.1256	0.615	113705	UK Biobank
Ever depressed for a whole week	0.8162	0.0822	3.12e-23	117705	UK Biobank
Ever unenthusiastic/disinterested for a whole week	0.8458	0.09092	1.375e-20	115145	UK Biobank
Ever manic/hyper for 2 days	0.7041	0.1395	4.481e-07	117155	UK Biobank
Ever highly irritable/argumentative for 2 days	0.7223	0.09223	4.827e-15	117359	UK Biobank
Shortness of breath walking on level ground	0.4989	0.08339	2.189e-09	118006	UK Biobank
Leg pain on walking	0.4486	0.08355	7.871e-08	118905	UK Biobank
Tinnitus: No, never	-0.3967	0.07446	9.906e-08	117882	UK Biobank
Tinnitus: Yes, now most or all of the time	0.3544	0.104	0.0006579	117882	UK Biobank
Tinnitus: Yes, now some of the time	0.4615	0.166	0.005428	117882	UK Biobank
Tinnitus: Yes, but not now, but have in the past	0.2939	0.1237	0.01745	117882	UK Biobank
FI1 : numeric addition test	-0.233	0.1636	0.1544	116723	UK Biobank
FI3 : word interpolation	-0.2566	0.07201	0.0003662	116815	UK Biobank
FI4 : positional arithmetic	-0.228	0.07379	0.002001	115690	UK Biobank
FI5 : family relationship calculation	-0.0363	0.09146	0.6915	113356	UK Biobank
FI6 : conditional arithmetic	-0.21	0.07555	0.005435	102181	UK Biobank
FI7 : synonym	-0.1292	0.1028	0.2085	84560	UK Biobank
FI8 : chained arithmetic	-0.1397	0.06696	0.03698	75692	UK Biobank
Ever had eye surgery	0.127	0.1543	0.4104	79912	UK Biobank
Leg pain in calf/calves	0.2492	0.1634	0.1272	25567	UK Biobank
Leg pain when walking uphill or hurrying	0.3102	0.1466	0.0344	24997	UK Biobank
FI9 : concept interpolation	-0.2532	0.08535	0.003013	35147	UK Biobank
Length of longest manic/irritable episode	0.04893	0.183	0.7892	19474	UK Biobank
FI10 : arithmetic sequence recognition	-0.3167	0.1008	0.001673	20880	UK Biobank
FI11 : antonym	0.0216	0.1441	0.8808	12493	UK Biobank
Which eye(s) affected by myopia (short sight): Right eye	-0.03666	0.1347	0.7855	29317	UK Biobank
Which eye(s) affected by myopia (short sight): Both eyes	-0.04992	0.1743	0.7746	29317	UK Biobank
Which eye(s) affected by astigmatism: Right eye	0.007603	0.1468	0.9587	9749	UK Biobank
Which eye(s) affected by astigmatism: Both eyes	-0.3387	0.1883	0.07202	9749	UK Biobank
ECG, phase duration	-0.5567	0.176	0.001557	53998	UK Biobank
Chest pain felt during physical activity	0.6899	0.2764	0.01257	54011	UK Biobank
Completion status of test: Fully completed	0.01822	0.1826	0.9205	54007	UK Biobank
Completion status of test: Heart rate reached safety level	-0.08884	0.1469	0.5453	54007	UK Biobank
Target heart rate achieved	0.1076	0.1112	0.3333	53998	UK Biobank
Qualifications: College or University degree	-0.1514	0.04275	0.0003971	357549	UK Biobank
Qualifications: None of the above	0.2176	0.04777	5.23e-06	357549	UK Biobank
Qualifications: O levels/GCSEs or equivalent	-0.204	0.06541	0.00182	357549	UK Biobank
Qualifications: CSEs or equivalent	0.1031	0.07385	0.1627	357549	UK Biobank
Qualifications: NVQ or HND or HNC or equivalent	0.1913	0.08957	0.03266	357549	UK Biobank
Qualifications: Other professional qualifications eg: nursing, teaching	-0.1977	0.05823	0.0006852	357549	UK Biobank
Gas or solid-fuel cooking/heating: A gas hob or gas cooker	-0.1945	0.149	0.1919	360066	UK Biobank
Gas or solid-fuel cooking/heating: None of the above	0.3243	0.1308	0.01314	360066	UK Biobank
Gas or solid-fuel cooking/heating: A gas fire that you use regularly in winter time	-0.07538	0.1203	0.5308	360066	UK Biobank
Gas or solid-fuel cooking/heating: An open solid fuel fire that you use regularly in winter time	-0.2631	0.07365	0.0003545	360066	UK Biobank
How are people in household related to participant: Husband, wife or partner	-0.277	0.07414	0.0001865	358963	UK Biobank
How are people in household related to participant: Son and/or daughter (include step-children)	-0.342	0.119	0.004062	358963	UK Biobank
How are people in household related to participant: Mother and/or father	-0.08413	0.1973	0.6698	358963	UK Biobank
How are people in household related to participant: Grandchild	0.2532	0.1546	0.1013	358963	UK Biobank
Current employment status: In paid employment or self-employed	-0.3832	0.1008	0.0001441	359931	UK Biobank
Current employment status: Retired	-0.1279	0.1324	0.3341	359931	UK Biobank
Current employment status: Looking after home and/or family	0.1121	0.1224	0.3597	359931	UK Biobank
Current employment status: Unable to work because of sickness or disability	0.4731	0.0775	1.03e-09	359931	UK Biobank
Current employment status: Unemployed	0.433	0.1451	0.002845	359931	UK Biobank
Current employment status: Doing unpaid or voluntary work	0.02944	0.09512	0.7569	359931	UK Biobank
Transport type for commuting to job workplace: Car/motor vehicle	-0.0003848	0.09172	0.9967	190832	UK Biobank
Transport type for commuting to job workplace: Walk	0.01381	0.1151	0.9045	190832	UK Biobank
Transport type for commuting to job workplace: Public transport	-0.07659	0.08889	0.3889	190832	UK Biobank
Transport type for commuting to job workplace: Cycle	-0.2653	0.077	0.0005707	190832	UK Biobank
Never eat eggs, dairy, wheat, sugar: Eggs or foods containing eggs	0.1764	0.1006	0.07955	359777	UK Biobank
Never eat eggs, dairy, wheat, sugar: Dairy products	0.3463	0.1453	0.01713	359777	UK Biobank
Never eat eggs, dairy, wheat, sugar: Wheat products	0.2766	0.1788	0.1219	359777	UK Biobank
Never eat eggs, dairy, wheat, sugar: Sugar or foods/drinks containing sugar	0.1466	0.05851	0.01224	359777	UK Biobank
Never eat eggs, dairy, wheat, sugar: I eat all of the above	-0.183	0.06105	0.002716	359777	UK Biobank
Illness, injury, bereavement, stress in last 2 years: Serious illness, injury or assault to yourself	0.5192	0.08945	6.456e-09	358836	UK Biobank
Illness, injury, bereavement, stress in last 2 years: None of the above	-0.4767	0.07229	4.286e-11	358836	UK Biobank
Illness, injury, bereavement, stress in last 2 years: Serious illness, injury or assault of a close relative	0.3135	0.1034	0.002428	358836	UK Biobank
Illness, injury, bereavement, stress in last 2 years: Death of a close relative	0.2146	0.1077	0.04634	358836	UK Biobank
Illness, injury, bereavement, stress in last 2 years: Marital separation/divorce	0.4946	0.1539	0.001314	358836	UK Biobank
Illness, injury, bereavement, stress in last 2 years: Financial difficulties	0.4949	0.06378	8.565e-15	358836	UK Biobank
Attendance/disability/mobility allowance: None of the above	-0.3985	0.07414	7.654e-08	358597	UK Biobank
Attendance/disability/mobility allowance: Disability living allowance	0.4561	0.07016	7.961e-11	358597	UK Biobank
Attendance/disability/mobility allowance: Blue badge	0.3418	0.08238	3.334e-05	358597	UK Biobank
Reason for glasses/contact lenses: For short-sightedness, i.e. only or mainly for distance viewing such as driving, cinema etc (called 'myopia')	-0.1523	0.07771	0.05003	360677	UK Biobank
Reason for glasses/contact lenses: For long-sightedness, i.e. for distance and near, but particularly for near tasks like reading (called 'hypermetropia')	0.1443	0.09838	0.1425	360677	UK Biobank
Reason for glasses/contact lenses: For just reading/near work as you are getting older (called 'presbyopia')	-0.1487	0.1689	0.3787	360677	UK Biobank
Reason for glasses/contact lenses: For 'astigmatism'	-0.01507	0.09936	0.8795	360677	UK Biobank
Reason for glasses/contact lenses: For a 'squint' or 'turn' in an eye since childhood (called 'strabismus')	0.1587	0.1373	0.2479	360677	UK Biobank
Reason for glasses/contact lenses: For a 'lazy' eye or an eye with poor vision since childhood (called 'amblyopia')	0.01153	0.1293	0.9289	360677	UK Biobank
Eye problems/disorders: Diabetes related eye disease	0.08679	0.1089	0.4253	117890	UK Biobank
Eye problems/disorders: None of the above	-0.04873	0.1021	0.633	117890	UK Biobank
Eye problems/disorders: Glaucoma	-0.05053	0.09868	0.6086	117890	UK Biobank
Eye problems/disorders: Cataract	-0.2437	0.1151	0.03433	117890	UK Biobank
Mouth/teeth dental problems: Mouth ulcers	0.2474	0.0684	0.0002979	359841	UK Biobank
Mouth/teeth dental problems: None of the above	-0.393	0.06654	3.503e-09	359841	UK Biobank
Mouth/teeth dental problems: Painful gums	0.5345	0.1328	5.726e-05	359841	UK Biobank
Mouth/teeth dental problems: Bleeding gums	0.1751	0.07348	0.01717	359841	UK Biobank
Mouth/teeth dental problems: Loose teeth	0.5024	0.09838	3.278e-07	359841	UK Biobank
Mouth/teeth dental problems: Toothache	0.4872	0.1177	3.48e-05	359841	UK Biobank
Mouth/teeth dental problems: Dentures	0.164	0.06159	0.007738	359841	UK Biobank
Vascular/heart problems diagnosed by doctor: Heart attack	0.2898	0.0723	6.117e-05	360420	UK Biobank
Vascular/heart problems diagnosed by doctor: None of the above	-0.1565	0.04546	0.0005743	360420	UK Biobank
Vascular/heart problems diagnosed by doctor: Angina	0.2585	0.07011	0.0002261	360420	UK Biobank
Vascular/heart problems diagnosed by doctor: Stroke	0.6327	0.1736	0.0002669	360420	UK Biobank
Vascular/heart problems diagnosed by doctor: High blood pressure	0.1408	0.04578	0.002093	360420	UK Biobank
Fractured bone site(s): Ankle	0.2911	0.1294	0.02447	359241	UK Biobank
Fractured bone site(s): Leg	0.01951	0.2403	0.9353	359241	UK Biobank
Fractured bone site(s): Wrist	0.2045	0.1311	0.1188	359241	UK Biobank
Fractured bone site(s): Arm	-0.1542	0.1455	0.2893	359241	UK Biobank
Fractured bone site(s): Other bones	0.348	0.1068	0.001116	359241	UK Biobank
Blood clot, DVT, bronchitis, emphysema, asthma, rhinitis, eczema, allergy diagnosed by doctor: None of the above	-0.2077	0.0483	1.704e-05	360527	UK Biobank
Blood clot, DVT, bronchitis, emphysema, asthma, rhinitis, eczema, allergy diagnosed by doctor: Blood clot in the leg (DVT)	0.2131	0.1051	0.04255	360527	UK Biobank
Blood clot, DVT, bronchitis, emphysema, asthma, rhinitis, eczema, allergy diagnosed by doctor: Emphysema/chronic bronchitis	0.3982	0.1185	0.0007756	360527	UK Biobank
Blood clot, DVT, bronchitis, emphysema, asthma, rhinitis, eczema, allergy diagnosed by doctor: Blood clot in the lung	0.3908	0.122	0.001357	360527	UK Biobank
Blood clot, DVT, bronchitis, emphysema, asthma, rhinitis, eczema, allergy diagnosed by doctor: Asthma	0.2127	0.05502	0.0001109	360527	UK Biobank
Blood clot, DVT, bronchitis, emphysema, asthma, rhinitis, eczema, allergy diagnosed by doctor: Hayfever, allergic rhinitis or eczema	0.1232	0.04478	0.005947	360527	UK Biobank
Medication for cholesterol, blood pressure, diabetes, or take exogenous hormones: Cholesterol lowering medication	0.1445	0.06718	0.03146	193148	UK Biobank
Medication for cholesterol, blood pressure, diabetes, or take exogenous hormones: None of the above	-0.151	0.06196	0.01481	193148	UK Biobank
Medication for cholesterol, blood pressure, diabetes, or take exogenous hormones: Blood pressure medication	0.05665	0.05653	0.3163	193148	UK Biobank
Medication for cholesterol, blood pressure, diabetes, or take exogenous hormones: Insulin	-0.1386	0.1591	0.3837	193148	UK Biobank
Medication for cholesterol, blood pressure, diabetes, or take exogenous hormones: Hormone replacement therapy	0.2505	0.1067	0.01891	193148	UK Biobank
Medication for cholesterol, blood pressure, diabetes, or take exogenous hormones: Oral contraceptive pill or minipill	-0.023	0.1782	0.8973	193148	UK Biobank
Medication for pain relief, constipation, heartburn: Aspirin	0.2785	0.07295	0.0001345	357084	UK Biobank
Medication for pain relief, constipation, heartburn: None of the above	-0.4485	0.05671	2.598e-15	357084	UK Biobank
Medication for pain relief, constipation, heartburn: Ibuprofen (e.g. Nurofen)	0.4204	0.08181	2.777e-07	357084	UK Biobank
Medication for pain relief, constipation, heartburn: Paracetamol	0.355	0.06166	8.553e-09	357084	UK Biobank
Medication for pain relief, constipation, heartburn: Ranitidine (e.g. Zantac)	0.4981	0.1241	6.021e-05	357084	UK Biobank
Medication for pain relief, constipation, heartburn: Omeprazole (e.g. Zanprol)	0.5447	0.07997	9.696e-12	357084	UK Biobank
Medication for pain relief, constipation, heartburn: Laxatives (e.g. Dulcolax, Senokot)	0.3557	0.09124	9.668e-05	357084	UK Biobank
Vitamin and mineral supplements: Vitamin A	0.1432	0.124	0.248	359245	UK Biobank
Vitamin and mineral supplements: None of the above	-0.1844	0.06505	0.004582	359245	UK Biobank
Vitamin and mineral supplements: Vitamin B	0.3702	0.1063	0.000495	359245	UK Biobank
Vitamin and mineral supplements: Vitamin C	0.1971	0.09521	0.03847	359245	UK Biobank
Vitamin and mineral supplements: Vitamin D	0.08268	0.1062	0.4361	359245	UK Biobank
Vitamin and mineral supplements: Vitamin E	0.2532	0.1123	0.02416	359245	UK Biobank
Vitamin and mineral supplements: Multivitamins +/- minerals	0.1625	0.06362	0.01064	359245	UK Biobank
Manic/hyper symptoms: None of the above	-0.3577	0.1534	0.01974	24049	UK Biobank
Manic/hyper symptoms: I was more active than usual	-0.133	0.213	0.5323	24049	UK Biobank
Why stopped smoking: Illness or ill health	0.4466	0.1403	0.001454	88516	UK Biobank
Why stopped smoking: None of the above	0.003066	0.1005	0.9757	88516	UK Biobank
Why stopped smoking: Doctor's advice	0.4721	0.1564	0.002531	88516	UK Biobank
Why stopped smoking: Health precaution	-0.1731	0.08347	0.0381	88516	UK Biobank
Why stopped smoking: Financial reasons	0.2983	0.1785	0.09465	88516	UK Biobank
Why reduced smoking: Illness or ill health	0.2271	0.1695	0.1804	11443	UK Biobank
Why reduced smoking: Health precaution	-0.008167	0.1919	0.966	11443	UK Biobank
Pain type(s) experienced in last month: Headache	0.3843	0.06226	6.689e-10	360391	UK Biobank
Pain type(s) experienced in last month: None of the above	-0.5055	0.05943	1.802e-17	360391	UK Biobank
Pain type(s) experienced in last month: Facial pain	0.4522	0.1074	2.559e-05	360391	UK Biobank
Pain type(s) experienced in last month: Back pain	0.4791	0.06257	1.898e-14	360391	UK Biobank
Pain type(s) experienced in last month: Stomach or abdominal pain	0.5924	0.08008	1.379e-13	360391	UK Biobank
Pain type(s) experienced in last month: Hip pain	0.4975	0.07938	3.662e-10	360391	UK Biobank
Pain type(s) experienced in last month: Knee pain	0.283	0.06153	4.234e-06	360391	UK Biobank
Pain type(s) experienced in last month: Pain all over the body	0.3873	0.1098	0.000417	360391	UK Biobank
Leisure/social activities: Sports club or gym	-0.4073	0.0584	3.082e-12	360063	UK Biobank
Leisure/social activities: None of the above	0.2689	0.07199	0.0001872	360063	UK Biobank
Leisure/social activities: Pub or social club	-0.06011	0.06155	0.3288	360063	UK Biobank
Leisure/social activities: Religious group	-0.1103	0.06306	0.08033	360063	UK Biobank
Leisure/social activities: Adult education class	-0.1132	0.08678	0.1921	360063	UK Biobank
Leisure/social activities: Other group activity	-0.009699	0.07916	0.9025	360063	UK Biobank
Types of transport used (excluding work): Car/motor vehicle	-0.1327	0.06892	0.05427	359324	UK Biobank
Types of transport used (excluding work): None of the above	0.2169	0.1266	0.08657	359324	UK Biobank
Types of transport used (excluding work): Walk	-0.09188	0.06485	0.1566	359324	UK Biobank
Types of transport used (excluding work): Public transport	0.02356	0.07403	0.7503	359324	UK Biobank
Types of transport used (excluding work): Cycle	-0.2536	0.0755	0.0007826	359324	UK Biobank
Types of physical activity in last 4 weeks: Walking for pleasure (not as a means of transport)	-0.2725	0.06454	2.426e-05	359263	UK Biobank
Types of physical activity in last 4 weeks: None of the above	0.4454	0.06787	5.292e-11	359263	UK Biobank
Types of physical activity in last 4 weeks: Strenuous sports	-0.3335	0.06716	6.854e-07	359263	UK Biobank
Types of physical activity in last 4 weeks: Light DIY (eg: pruning, watering the lawn)	-0.1169	0.05681	0.03969	359263	UK Biobank
Types of physical activity in last 4 weeks: Heavy DIY (eg: weeding, lawn mowing, carpentry, digging)	-0.2285	0.06224	0.0002408	359263	UK Biobank
Medication for cholesterol, blood pressure or diabetes: Cholesterol lowering medication	0.2345	0.05692	3.783e-05	165340	UK Biobank
Medication for cholesterol, blood pressure or diabetes: None of the above	-0.1803	0.05607	0.001301	165340	UK Biobank
Medication for cholesterol, blood pressure or diabetes: Blood pressure medication	0.1032	0.05449	0.05824	165340	UK Biobank
Medication for cholesterol, blood pressure or diabetes: Insulin	0.2651	0.1508	0.07878	165340	UK Biobank
Mineral and other dietary supplements: Fish oil (including cod liver oil)	-0.03887	0.06786	0.5668	360016	UK Biobank
Mineral and other dietary supplements: None of the above	0.01672	0.06419	0.7945	360016	UK Biobank
Mineral and other dietary supplements: Glucosamine	-0.06521	0.06922	0.3461	360016	UK Biobank
Mineral and other dietary supplements: Calcium	0.1073	0.07928	0.1759	360016	UK Biobank
Mineral and other dietary supplements: Zinc	0.3102	0.09248	0.0007949	360016	UK Biobank
Mineral and other dietary supplements: Iron	0.1575	0.1267	0.2137	360016	UK Biobank
Mineral and other dietary supplements: Selenium	0.2268	0.1199	0.05847	360016	UK Biobank
Type of accommodation lived in: A house or bungalow	-0.3914	0.08414	3.295e-06	360088	UK Biobank
Type of accommodation lived in: A flat, maisonette or apartment	0.389	0.08909	1.265e-05	360088	UK Biobank
Type of accommodation lived in: Sheltered accommodation	0.1622	0.1927	0.4001	360088	UK Biobank
Own or rent accommodation lived in: Own outright (by you or someone in your household)	-0.279	0.06393	1.276e-05	356340	UK Biobank
Own or rent accommodation lived in: Own with a mortgage	-0.07941	0.09807	0.4181	356340	UK Biobank
Own or rent accommodation lived in: Rent - from local authority, local council, housing association	0.4413	0.05674	7.38e-15	356340	UK Biobank
Own or rent accommodation lived in: Rent - from private landlord or letting agency	0.2661	0.1178	0.02393	356340	UK Biobank
Own or rent accommodation lived in: Pay part rent and part mortgage (shared ownership)	0.3411	0.1589	0.03186	356340	UK Biobank
Bone mineral density	-0.05652	0.03812	0.1381	426824	GEFOS
Bone fractures	0.1264	0.06273	0.0439	426824	GEFOS
Albumin	-0.03088	0.03922	0.4311	367192	UK Biobank (EUR)
Alkaline phosphatase	0.05027	0.05343	0.3468	400988	UK Biobank (EUR)
Alanine aminotransferase	0.05683	0.05395	0.2922	400822	UK Biobank (EUR)
Apolipoprotein A	-0.02873	0.04257	0.4998	364987	UK Biobank (EUR)
Apolipoprotein B	-0.006666	0.04967	0.8932	399003	UK Biobank (EUR)
Aspartate aminotransferase	-0.03774	0.05312	0.4774	399482	UK Biobank (EUR)
Direct bilirubin	0.02732	0.05232	0.6015	340934	UK Biobank (EUR)
Urea	-0.02232	0.04297	0.6035	400687	UK Biobank (EUR)
Calcium	0.01434	0.03709	0.699	367050	UK Biobank (EUR)
Cholesterol	-0.03005	0.04408	0.4954	400963	UK Biobank (EUR)
Creatinine	-0.008177	0.04495	0.8557	400761	UK Biobank (EUR)
C-reactive protein	0.08243	0.04753	0.08288	400094	UK Biobank (EUR)
Cystatin C	0.09354	0.03277	0.004307	400940	UK Biobank (EUR)
Gamma glutamyltransferase	0.1376	0.04159	0.0009355	400751	UK Biobank (EUR)
Glucose	0.1253	0.04868	0.01008	366759	UK Biobank (EUR)
Glycated haemoglobin (HbA1c)	0.06932	0.0433	0.1094	400825	UK Biobank (EUR)
HDL cholesterol	-0.09472	0.03886	0.01479	367021	UK Biobank (EUR)
IGF-1	-0.09401	0.03706	0.0112	398797	UK Biobank (EUR)
LDL direct	-0.03511	0.04853	0.4693	400223	UK Biobank (EUR)
Lipoprotein A	-0.06062	0.4751	0.8985	318922	UK Biobank (EUR)
Oestradiol	-0.277	0.1761	0.1157	63332	UK Biobank (EUR)
Phosphate	-0.08728	0.0481	0.06961	366484	UK Biobank (EUR)
Rheumatoid factor	-0.03153	0.1599	0.8437	35667	UK Biobank (EUR)
SHBG	-0.08701	0.03472	0.01221	363650	UK Biobank (EUR)
Total bilirubin	-0.02431	0.04833	0.6149	399286	UK Biobank (EUR)
Testosterone	0.004571	0.04606	0.9209	363203	UK Biobank (EUR)
Total protein	-0.003727	0.04798	0.9381	366758	UK Biobank (EUR)
Triglycerides	0.1442	0.04344	0.0009061	400639	UK Biobank (EUR)
Urate	0.05232	0.03649	0.1517	400469	UK Biobank (EUR)
Vitamin D	-0.1512	0.04841	0.001788	383324	UK Biobank (EUR)
Basic Nerve Growth Factor	-0.0288	0.1941	0.882	8293	Young Finns Study (YFS)
Certain infectious and parasitic diseases	0.08165	0.19	0.6674	361194	UK Biobank
Childhood asthma (age<16)	0.3229	0.1568	0.03944	361194	UK Biobank
Suggestive for eosinophilic asthma	0.06762	0.1186	0.5687	361194	UK Biobank
Asthma, hospital admissions 1	0.321	0.1579	0.04201	361194	UK Biobank
Medication related adverse effects	-0.1315	0.0827	0.1119	361194	UK Biobank
NA	-0.1254	0.1877	0.504	361194	UK Biobank
Asthma-related pneumonia	0.4079	0.1631	0.01239	361194	UK Biobank
Malignant neoplasm of breast	6.605e-05	0.09272	0.9994	361194	UK Biobank
Malignant neoplasm of bronchus and lung	0.1084	0.1177	0.357	361194	UK Biobank
Malignant neoplasm of colon	-0.04929	0.1479	0.7389	361194	UK Biobank
NA	0.0338	0.125	0.7868	361194	UK Biobank
NA	0.05897	0.09469	0.5335	361194	UK Biobank
Malignant melanoma of skin	0.07734	0.1549	0.6176	361194	UK Biobank
Mesothelioma	-0.08957	0.1502	0.5511	361194	UK Biobank
Other malignant neoplasms of skin	-0.1327	0.06284	0.03469	361194	UK Biobank
Malignant neoplasm of prostate	0.0716	0.0981	0.4654	361194	UK Biobank
NA	0.2164	0.1396	0.121	361194	UK Biobank
NA	-0.1076	0.06382	0.09185	361194	UK Biobank
STROKE	0.366	0.1815	0.04379	361194	UK Biobank
Diagnoses - main ICD10: C02 Malignant neoplasm of other and unspecified parts of tongue	0.0616	0.2	0.7581	361194	UK Biobank
Diagnoses - main ICD10: C15 Malignant neoplasm of oesophagus	0.07534	0.2101	0.7199	361194	UK Biobank
Diagnoses - main ICD10: C18 Malignant neoplasm of colon	0.1359	0.1402	0.3322	361194	UK Biobank
Diagnoses - main ICD10: C25 Malignant neoplasm of pancreas	0.03522	0.206	0.8643	361194	UK Biobank
Malignant neoplasm of breast	6.605e-05	0.09272	0.9994	361194	UK Biobank
Malignant neoplasm of bronchus and lung	0.1084	0.1177	0.357	361194	UK Biobank
Malignant neoplasm of colon	-0.04929	0.1479	0.7389	361194	UK Biobank
Malignant neoplasm of digestive organs	0.0338	0.125	0.7868	361194	UK Biobank
malignant neoplasm of male genital organs	0.05897	0.09469	0.5335	361194	UK Biobank
Malignant melanoma of skin	0.07734	0.1549	0.6176	361194	UK Biobank
Mesothelioma	-0.08957	0.1502	0.5511	361194	UK Biobank
Other malignant neoplasms of skin	-0.1327	0.06284	0.03469	361194	UK Biobank
Malignant neoplasm of prostate	0.0716	0.0981	0.4654	361194	UK Biobank
Malignant neoplasm of respiratory system and intrathoracic organs	0.2164	0.1396	0.121	361194	UK Biobank
Malignant neoplasm of skin	-0.1076	0.06382	0.09185	361194	UK Biobank
Diagnoses - main ICD10: C34 Malignant neoplasm of bronchus and lung	0.1881	0.1502	0.2103	361194	UK Biobank
Diagnoses - main ICD10: C43 Malignant melanoma of skin	-0.1292	0.175	0.4603	361194	UK Biobank
Diagnoses - main ICD10: C44 Other malignant neoplasms of skin	-0.07778	0.07829	0.3204	361194	UK Biobank
Diagnoses - main ICD10: C50 Malignant neoplasm of breast	0.0276	0.09704	0.7761	361194	UK Biobank
Diagnoses - main ICD10: C61 Malignant neoplasm of prostate	0.04299	0.1154	0.7094	361194	UK Biobank
Diagnoses - main ICD10: C67 Malignant neoplasm of bladder	0.05366	0.1929	0.7809	361194	UK Biobank
Cardiac arrhytmias, COPD co-morbidities	0.04171	0.07952	0.5999	361194	UK Biobank
Chron's disease NAS	0.2675	0.1688	0.113	361194	UK Biobank
Noninfectious colitis NAS	0.4142	0.1291	0.001339	361194	UK Biobank
COPD, early/later onset	0.4122	0.1283	0.001317	361194	UK Biobank
COPD differential diagnosis	0.4003	0.1037	0.0001127	361194	UK Biobank
COPD related to chronic (opportunist) infections	-0.1813	0.1912	0.343	361194	UK Biobank
Coxarthrosis [arthrosis of hip](FG)	0.00497	0.08918	0.9556	361194	UK Biobank
Diagnoses - main ICD10: D12 Benign neoplasm of colon, rectum, anus and anal canal	0.2546	0.08937	0.004385	361194	UK Biobank
Diagnoses - main ICD10: D17 Benign lipomatous neoplasm	0.4349	0.1999	0.02957	361194	UK Biobank
Diagnoses - main ICD10: D23 Other benign neoplasms of skin	0.1122	0.2144	0.6008	361194	UK Biobank
Diagnoses - main ICD10: D25 Leiomyoma of uterus	0.009581	0.1302	0.9413	361194	UK Biobank
Iron deficiency anaemia	-0.03492	0.1299	0.7881	361194	UK Biobank
Diagnoses - main ICD10: D50 Iron deficiency anaemia	-0.03492	0.1299	0.7881	361194	UK Biobank
Diagnoses - main ICD10: D86 Sarcoidosis	-0.147	0.2001	0.4626	361194	UK Biobank
Diagnoses - main ICD10: E04 Other non-toxic goitre	0.04322	0.1368	0.7521	361194	UK Biobank
Diagnoses - main ICD10: E11 Non-insulin-dependent diabetes mellitus	0.02888	0.1371	0.8332	361194	UK Biobank
Type 2 diabetes	0.01712	0.1374	0.9009	361194	UK Biobank
Obesity	0.2643	0.1426	0.06371	361194	UK Biobank
Obesity, other/unspecified	0.2864	0.1421	0.04387	361194	UK Biobank
Diagnoses - main ICD10: E66 Obesity	0.2849	0.1448	0.04908	361194	UK Biobank
Diagnoses - main ICD10: E87 Other disorders of fluid, electrolyte and acid-base balance	0.005527	0.1788	0.9753	361194	UK Biobank
Unsepcified/other endometriosis	0.1266	0.1807	0.4835	361194	UK Biobank
Diagnoses - main ICD10: F10 Mental and behavioural disorders due to use of alcohol	0.2432	0.1447	0.09294	361194	UK Biobank
Diagnoses - main ICD10: F31 Bipolar affective disorder	0.2572	0.129	0.04616	361194	UK Biobank
Diagnoses - main ICD10: F32 Depressive episode	0.4881	0.1747	0.005216	361194	UK Biobank
Depression	0.423	0.1343	0.001631	361194	UK Biobank
Mood [affective] disorders	0.4178	0.1196	0.0004783	361194	UK Biobank
Fibromyalgia related co-morbidities	0.7273	0.2089	0.0004971	361194	UK Biobank
Diagnoses - main ICD10: G37 Other demyelinating diseases of central nervous system	-0.1695	0.2238	0.4487	361194	UK Biobank
Diagnoses - main ICD10: G47 Sleep disorders	0.3904	0.1435	0.006503	361194	UK Biobank
Diagnoses - main ICD10: G56 Mononeuropathies of upper limb	0.2892	0.06876	2.6e-05	361194	UK Biobank
Carpal tunnel syndrome	0.238	0.07023	0.0007013	361194	UK Biobank
Disorders of brain, other and unspecified	-0.1649	0.1531	0.2813	361194	UK Biobank
Episodal and paroxysmal disorders	0.5207	0.1539	0.0007132	361194	UK Biobank
Nerve, nerve root and plexus disorders	0.3272	0.06878	1.96e-06	361194	UK Biobank
Polyneuropathies and other disorders of the peripheral nervous system	0.09918	0.1688	0.5569	361194	UK Biobank
Other and unspecified polyneuropathies, also in other diseases	0.1248	0.1687	0.4595	361194	UK Biobank
Sleep apnoea	0.2612	0.1509	0.08339	361194	UK Biobank
Glomerulonephritis	-0.2094	0.1726	0.225	361194	UK Biobank
Diagnoses - main ICD10: H25 Senile cataract	-0.1401	0.1129	0.2144	361194	UK Biobank
Diagnoses - main ICD10: H26 Other cataract	-0.1019	0.08993	0.257	361194	UK Biobank
Diagnoses - main ICD10: H33 Retinal detachments and breaks	-0.0259	0.09418	0.7833	361194	UK Biobank
Diagnoses - main ICD10: H40 Glaucoma	0.1495	0.1672	0.3714	361194	UK Biobank
Diagnoses - main ICD10: H53 Visual disturbances	-0.01193	0.1766	0.9461	361194	UK Biobank
Diagnoses - main ICD10: H65 Nonsuppurative otitis media	0.4556	0.2235	0.04151	361194	UK Biobank
Entropion and trichiasis of eyelid	0.1771	0.1574	0.2605	361194	UK Biobank
Other disorders affecting eyelid function	0.03784	0.2067	0.8547	361194	UK Biobank
Other and unspecified glaucoma	0.1779	0.1576	0.2591	361194	UK Biobank
Disorders of lens	-0.1343	0.08038	0.09479	361194	UK Biobank
Retinal detachments and breaks	0.006017	0.09505	0.9495	361194	UK Biobank
Retinal detachment with retinal break	-0.3663	0.1432	0.01053	361194	UK Biobank
Other, unspecified and serous retinal detachments	0.4077	0.1896	0.03157	361194	UK Biobank
Visual disturbances	-0.01193	0.1766	0.9461	361194	UK Biobank
Diagnoses - main ICD10: H80 Otosclerosis	-0.2155	0.2138	0.3135	361194	UK Biobank
Heart failure	0.02885	0.1396	0.8362	361194	UK Biobank
Certain infectious and parasitic diseases	0.08897	0.1804	0.6219	361194	UK Biobank
Diagnoses - main ICD10: I10 Essential (primary) hypertension	0.4482	0.2104	0.0332	361194	UK Biobank
Diagnoses - main ICD10: I12 Hypertensive renal disease	-0.2503	0.2003	0.2114	361194	UK Biobank
Diagnoses - main ICD10: I20 Angina pectoris	0.3985	0.08922	7.965e-06	361194	UK Biobank
Diagnoses - main ICD10: I21 Acute myocardial infarction	0.1818	0.09033	0.0441	361194	UK Biobank
Diagnoses - main ICD10: I25 Chronic ischaemic heart disease	0.2583	0.06508	7.235e-05	361194	UK Biobank
Diagnoses - main ICD10: I26 Pulmonary embolism	0.1555	0.1954	0.426	361194	UK Biobank
Diagnoses - main ICD10: I35 Nonrheumatic aortic valve disorders	0.2535	0.184	0.1682	361194	UK Biobank
Diagnoses - main ICD10: I42 Cardiomyopathy	-0.0858	0.1686	0.6109	361194	UK Biobank
Diagnoses - main ICD10: I48 Atrial fibrillation and flutter	0.006103	0.07722	0.937	361194	UK Biobank
Diagnoses - main ICD10: I50 Heart failure	0.03291	0.1438	0.819	361194	UK Biobank
Diagnoses - main ICD10: I71 Aortic aneurysm and dissection	0.354	0.1595	0.02642	361194	UK Biobank
Diagnoses - main ICD10: I80 Phlebitis and thrombophlebitis	-0.07493	0.1079	0.4873	361194	UK Biobank
Diagnoses - main ICD10: I83 Varicose veins of lower extremities	-0.06537	0.07364	0.3747	361194	UK Biobank
Diagnoses - main ICD10: I84 Haemorrhoids	0.09929	0.09501	0.296	361194	UK Biobank
Dissection of aorta	0.04008	0.1903	0.8331	361194	UK Biobank
Cardiomyopathies, Primary/intrinsic	0.03505	0.1868	0.8511	361194	UK Biobank
Major coronary heart disease event excluding revascularizations	0.2134	0.07734	0.005794	361194	UK Biobank
Major coronary heart disease event	0.2134	0.07734	0.005794	361194	UK Biobank
Coronary atherosclerosis	0.2507	0.06444	9.986e-05	361194	UK Biobank
Diseases of veins, lymphatic vessels and lymph nodes, not elsewhere classified	-0.04922	0.07364	0.5039	361194	UK Biobank
DVT of lower extremities and pulmonary embolism	0.03908	0.08494	0.6455	361194	UK Biobank
Heart failure, not strict	0.02885	0.1396	0.8362	361194	UK Biobank
Heart failure,strict	0.02885	0.1396	0.8362	361194	UK Biobank
Hypertensive diseases	0.08426	0.1512	0.5772	361194	UK Biobank
Hypertension	0.1577	0.16	0.3242	361194	UK Biobank
Hypertensive heart and/or renal disease	-0.2862	0.1911	0.1342	361194	UK Biobank
Ischaemic heart disease, wide definition	0.3032	0.06157	8.489e-07	361194	UK Biobank
Death due to cardiac causes	-0.05442	0.1615	0.7362	361194	UK Biobank
Myocardial infarction, strict	0.1852	0.08579	0.0309	361194	UK Biobank
Myocardial infarction	0.1852	0.08579	0.0309	361194	UK Biobank
Peripheral artery disease	0.3717	0.1924	0.05338	361194	UK Biobank
DVT of lower extremities	-0.04254	0.1016	0.6756	361194	UK Biobank
Unstable angina pectoris	0.2983	0.1073	0.005422	361194	UK Biobank
Venous thromboembolism	0.01802	0.0847	0.8315	361194	UK Biobank
Endometriosis, IBD co-morbidity	0.1954	0.1223	0.1102	361194	UK Biobank
Any ICDMAIN event in hilmo or causes of death	0.3826	0.06644	8.451e-09	361194	UK Biobank
Neoplasms	0.1001	0.07865	0.2033	361194	UK Biobank
Diseases of the blood and blood-forming organs and certain disorders involving the immune mechanism	0.09925	0.1296	0.4436	361194	UK Biobank
ILD differential diagnosis	0.4003	0.1037	0.0001127	361194	UK Biobank
is_female, based on inferred genetic sex	-0.04797	0.108	0.6568	361194	UK Biobank
Endocrine, nutritional and metabolic diseases	0.2459	0.1312	0.0609	361194	UK Biobank
Diseases of the circulatory system	0.26	0.06446	5.511e-05	361194	UK Biobank
Asthma	0.3229	0.1568	0.03944	361194	UK Biobank
Asthma	0.3229	0.1568	0.03944	361194	UK Biobank
Diagnoses - main ICD10: J18 Pneumonia, organism unspecified	0.3982	0.1795	0.02652	361194	UK Biobank
Diagnoses - main ICD10: J33 Nasal polyp	0.0621	0.1145	0.5876	361194	UK Biobank
Diagnoses - main ICD10: J34 Other disorders of nose and nasal sinuses	0.2456	0.1582	0.1205	361194	UK Biobank
Diagnoses - main ICD10: J44 Other chronic obstructive pulmonary disease	0.4185	0.1261	0.0009018	361194	UK Biobank
Diagnoses - main ICD10: J45 Asthma	0.2722	0.1448	0.06016	361194	UK Biobank
Diagnoses - main ICD10: J47 Bronchiectasis	-0.2247	0.182	0.2172	361194	UK Biobank
Diagnoses - main ICD10: J84 Other interstitial pulmonary diseases	0.2781	0.1582	0.07887	361194	UK Biobank
Diseases of appendix	0.1547	0.1395	0.2675	361194	UK Biobank
Barret oesophagus	-0.02697	0.1233	0.8269	361194	UK Biobank
Coeliac disease	0.108	0.1268	0.3942	361194	UK Biobank
Disorders of gallbladder, biliary tract and pancreas	0.2484	0.07727	0.001306	361194	UK Biobank
Hernia	0.324	0.07457	1.397e-05	361194	UK Biobank
Ulcer of oesophagus	0.08224	0.137	0.5483	361194	UK Biobank
Other gastritis (incl. Duodenitis)	0.578	0.1234	2.791e-06	361194	UK Biobank
Diagnoses - main ICD10: K20 Oesophagitis	0.3838	0.1624	0.01812	361194	UK Biobank
Diagnoses - main ICD10: K21 Gastro-oesophageal reflux disease	0.3025	0.09066	0.0008478	361194	UK Biobank
Diagnoses - main ICD10: K22 Other diseases of oesophagus	0.1776	0.1137	0.1181	361194	UK Biobank
Diagnoses - main ICD10: K29 Gastritis and duodenitis	0.5627	0.1042	6.709e-08	361194	UK Biobank
Diagnoses - main ICD10: K30 Dyspepsia	0.296	0.1543	0.0551	361194	UK Biobank
Diagnoses - main ICD10: K35 Acute appendicitis	0.1938	0.1611	0.229	361194	UK Biobank
Diagnoses - main ICD10: K40 Inguinal hernia	0.1032	0.07096	0.1458	361194	UK Biobank
Diagnoses - main ICD10: K42 Umbilical hernia	0.252	0.1299	0.05228	361194	UK Biobank
Diagnoses - main ICD10: K43 Ventral hernia	0.2269	0.1398	0.1044	361194	UK Biobank
Diagnoses - main ICD10: K44 Diaphragmatic hernia	0.4932	0.1282	0.0001192	361194	UK Biobank
Diagnoses - main ICD10: K50 Crohn's disease [regional enteritis]	0.2208	0.1437	0.1243	361194	UK Biobank
Diagnoses - main ICD10: K51 Ulcerative colitis	0.08534	0.1097	0.4365	361194	UK Biobank
Diagnoses - main ICD10: K52 Other non-infective gastro-enteritis and colitis	0.4166	0.1284	0.001174	361194	UK Biobank
Diagnoses - main ICD10: K57 Diverticular disease of intestine	0.295	0.07157	3.761e-05	361194	UK Biobank
Diagnoses - main ICD10: K60 Fissure and fistula of anal and rectal regions	0.102	0.1114	0.3599	361194	UK Biobank
Diagnoses - main ICD10: K62 Other diseases of anus and rectum	0.3963	0.156	0.01106	361194	UK Biobank
Diagnoses - main ICD10: K63 Other diseases of intestine	0.2752	0.1803	0.1269	361194	UK Biobank
Diagnoses - main ICD10: K76 Other diseases of liver	0.129	0.1352	0.3401	361194	UK Biobank
Diagnoses - main ICD10: K80 Cholelithiasis	0.2211	0.08083	0.006221	361194	UK Biobank
Diagnoses - main ICD10: K81 Cholecystitis	0.7441	0.4118	0.07079	361194	UK Biobank
Diagnoses - main ICD10: K85 Acute pancreatitis	0.2499	0.1995	0.2105	361194	UK Biobank
Diagnoses - main ICD10: K90 Intestinal malabsorption	0.08684	0.1325	0.5122	361194	UK Biobank
Gonarthrosis [arthrosis of knee](FG)	0.04801	0.06764	0.4778	361194	UK Biobank
Any mental disorder	0.3828	0.1062	0.0003137	361194	UK Biobank
Mood disorders	0.4178	0.1196	0.0004783	361194	UK Biobank
Diagnoses - main ICD10: L03 Cellulitis	0.0168	0.1254	0.8934	361194	UK Biobank
Actinic keratosis	0.3621	0.1782	0.04218	361194	UK Biobank
Skin changes due to chronic exposure to nonionizing radiation	0.421	0.1716	0.01413	361194	UK Biobank
Psoriasis	0.07054	0.1683	0.6751	361194	UK Biobank
Diagnoses - main ICD10: L40 Psoriasis	0.07054	0.1683	0.6751	361194	UK Biobank
Diagnoses - main ICD10: L57 Skin changes due to chronic exposure to nonionising radiation	0.421	0.1716	0.01413	361194	UK Biobank
Diagnoses - main ICD10: L72 Follicular cysts of skin and subcutaneous tissue	0.05965	0.1394	0.6688	361194	UK Biobank
Lung cancer and mesothelioma	0.1377	0.1268	0.2776	361194	UK Biobank
Lung cancer and mesothelioma	0.1377	0.1268	0.2776	361194	UK Biobank
Adhesive capsulitis of shoulder	0.04577	0.1547	0.7673	361194	UK Biobank
Ohter specific/unspecified arthritis	0.1844	0.1849	0.3186	361194	UK Biobank
Other arthrosis	0.328	0.146	0.0246	361194	UK Biobank
#Arthrosis	0.1071	0.0723	0.1385	361194	UK Biobank
Other specified/unspecified disorders of synovium and tendon +Other specified/unspecified bursopathies	0.1308	0.1664	0.4318	361194	UK Biobank
Dorsalgia	0.3906	0.1039	0.0001704	361194	UK Biobank
Other/unspecified dorsalgia	0.4424	0.1579	0.005078	361194	UK Biobank
Other dorsopathies, not elsewhere classified	0.0794	0.1541	0.6064	361194	UK Biobank
Palmar fascial fibromatosis [Dupuytren]	0.02696	0.08627	0.7547	361194	UK Biobank
Fibroblastic disorders	0.0712	0.08702	0.4132	361194	UK Biobank
Ganglion	-0.07301	0.1449	0.6143	361194	UK Biobank
Hallux rigidus	-0.1175	0.1371	0.3912	361194	UK Biobank
Hallux valgus (acquired)	0.0272	0.09099	0.765	361194	UK Biobank
Other hammer toe(s) (acquired)	-0.2123	0.2381	0.3726	361194	UK Biobank
Impingement syndrome of shoulder	0.274	0.1165	0.01871	361194	UK Biobank
Other specific joint derangements/joint disorders	0.1429	0.137	0.297	361194	UK Biobank
Lateral epicondylitis	0.2818	0.1699	0.0972	361194	UK Biobank
Low back pain	0.2951	0.1172	0.01179	361194	UK Biobank
Meniscus derangement	-0.0054	0.09529	0.9548	361194	UK Biobank
Disorders of muscles	-0.1259	0.184	0.494	361194	UK Biobank
Olecranon bursitis	0.0341	0.1774	0.8476	361194	UK Biobank
Osteoporosis	-0.02925	0.129	0.8206	361194	UK Biobank
#Other joint disorders	0.1018	0.07941	0.1999	361194	UK Biobank
#Polyarthropathies	0.02278	0.1492	0.8787	361194	UK Biobank
Rheumatoid arthritis	-0.09931	0.2233	0.6566	361194	UK Biobank
Rotator cuff syndrome	0.3158	0.1089	0.003725	361194	UK Biobank
Shoulder lesions	0.3108	0.09829	0.001568	361194	UK Biobank
Other specified/unspecified soft tissue disorders	0.04454	0.1632	0.7849	361194	UK Biobank
Other soft tissue disorders, not elsewhere classified	0.3133	0.1633	0.05512	361194	UK Biobank
Spinal stenosis	0.2038	0.1154	0.07741	361194	UK Biobank
#Spondylopathies	0.2441	0.1345	0.06948	361194	UK Biobank
Disorders of synovium and tendon	0.0168	0.1466	0.9087	361194	UK Biobank
Trigger finger	0.00379	0.1415	0.9786	361194	UK Biobank
Diagnoses - main ICD10: M13 Other arthritis	0.1237	0.163	0.4479	361194	UK Biobank
Diagnoses - main ICD10: M15 Polyarthrosis	-0.1034	0.1864	0.5789	361194	UK Biobank
Diagnoses - main ICD10: M16 Coxarthrosis [arthrosis of hip]	0.00497	0.08918	0.9556	361194	UK Biobank
Diagnoses - main ICD10: M17 Gonarthrosis [arthrosis of knee]	0.04801	0.06764	0.4778	361194	UK Biobank
Diagnoses - main ICD10: M19 Other arthrosis	0.3462	0.1737	0.04621	361194	UK Biobank
Diagnoses - main ICD10: M20 Acquired deformities of fingers and toes	0.002292	0.07791	0.9765	361194	UK Biobank
Diagnoses - main ICD10: M23 Internal derangement of knee	0.01496	0.08841	0.8656	361194	UK Biobank
Diagnoses - main ICD10: M25 Other joint disorders, not elsewhere classified	0.1625	0.1356	0.2308	361194	UK Biobank
Diagnoses - main ICD10: M47 Spondylosis	0.3384	0.1858	0.06849	361194	UK Biobank
Diagnoses - main ICD10: M48 Other spondylopathies	0.1849	0.1192	0.121	361194	UK Biobank
Diagnoses - main ICD10: M51 Other intervertebral disk disorders	0.4494	0.1372	0.001054	361194	UK Biobank
Diagnoses - main ICD10: M53 Other dorsopathies, not elsewhere classified	0.0794	0.1541	0.6064	361194	UK Biobank
Diagnoses - main ICD10: M54 Dorsalgia	0.3906	0.1039	0.0001704	361194	UK Biobank
Diagnoses - main ICD10: M65 Synovitis and tenosynovitis	0.03661	0.1446	0.8001	361194	UK Biobank
Diagnoses - main ICD10: M67 Other disorders of synovium and tendon	-0.03306	0.1378	0.8104	361194	UK Biobank
Diagnoses - main ICD10: M72 Fibroblastic disorders	0.07048	0.08772	0.4217	361194	UK Biobank
Diagnoses - main ICD10: M75 Shoulder lesions	0.3091	0.09831	0.001664	361194	UK Biobank
Diagnoses - main ICD10: M79 Other soft tissue disorders, not elsewhere classified	0.3133	0.1633	0.05512	361194	UK Biobank
Diagnoses - main ICD10: M81 Osteoporosis without pathological fracture	0.04665	0.1611	0.7722	361194	UK Biobank
Diagnoses - main ICD10: N20 Calculus of kidney and ureter	0.1618	0.0899	0.07198	361194	UK Biobank
Diagnoses - main ICD10: N32 Other disorders of bladder	0.07408	0.1461	0.6121	361194	UK Biobank
Diagnoses - main ICD10: N39 Other disorders of urinary system	0.2888	0.1112	0.009408	361194	UK Biobank
Diagnoses - main ICD10: N40 Hyperplasia of prostate	-0.08457	0.112	0.4502	361194	UK Biobank
Diagnoses - main ICD10: N43 Hydrocele and spermatocele	-0.1091	0.1264	0.388	361194	UK Biobank
Diagnoses - main ICD10: N47 Redundant prepuce, phimosis and paraphimosis	0.0651	0.1597	0.6835	361194	UK Biobank
Diagnoses - main ICD10: N60 Benign mammary dysplasia	-0.2749	0.1968	0.1625	361194	UK Biobank
Diagnoses - main ICD10: N80 Endometriosis	0.1954	0.1223	0.1102	361194	UK Biobank
Diagnoses - main ICD10: N81 Female genital prolapse	0.01522	0.09058	0.8666	361194	UK Biobank
Diagnoses - main ICD10: N84 Polyp of female genital tract	0.1176	0.1506	0.435	361194	UK Biobank
Diagnoses - main ICD10: N92 Excessive, frequent and irregular menstruation	0.2905	0.1276	0.02276	361194	UK Biobank
Other ILD-related CVD-co-morbidities	0.1165	0.1731	0.5009	361194	UK Biobank
Pneumonias (Asthma/COPD co-morbidities)	0.4079	0.1631	0.01239	361194	UK Biobank
Primary gonarthrosis, bilateral	0.3128	0.1555	0.04431	361194	UK Biobank
Medication related adverse effects (Asthma/COPD)	-0.1542	0.08689	0.07592	361194	UK Biobank
Other pulmonary diagnosis	0.4139	0.1063	9.891e-05	361194	UK Biobank
Diagnoses - main ICD10: R04 Haemorrhage from respiratory passages	0.3427	0.1661	0.03906	361194	UK Biobank
Diagnoses - main ICD10: R07 Pain in throat and chest	0.5103	0.08005	1.828e-10	361194	UK Biobank
Diagnoses - main ICD10: R10 Abdominal and pelvic pain	0.5189	0.09176	1.56e-08	361194	UK Biobank
Diagnoses - main ICD10: R14 Flatulence and related conditions	0.2295	0.1493	0.1243	361194	UK Biobank
Diagnoses - main ICD10: R19 Other symptoms and signs involving the digestive system and abdomen	1.078	0.3619	0.002893	361194	UK Biobank
Diagnoses - main ICD10: R31 Unspecified haematuria	0.3971	0.1539	0.009867	361194	UK Biobank
Diagnoses - main ICD10: R32 Unspecified urinary incontinence	0.3629	0.2135	0.08921	361194	UK Biobank
Diagnoses - main ICD10: R35 Polyuria	0.2378	0.1887	0.2078	361194	UK Biobank
Diagnoses - main ICD10: R51 Headache	0.5207	0.1753	0.002976	361194	UK Biobank
Diagnoses - main ICD10: R53 Malaise and fatigue	0.3596	0.1979	0.06923	361194	UK Biobank
Diagnoses - main ICD10: R55 Syncope and collapse	0.2777	0.1191	0.01968	361194	UK Biobank
Diagnoses - main ICD10: R69 Unknown and unspecified causes of morbidity	-0.001098	0.1299	0.9933	361194	UK Biobank
Diagnoses - main ICD10: R79 Other abnormal findings of blood chemistry	-0.4439	0.2179	0.04165	361194	UK Biobank
Diagnoses - main ICD10: R91 Abnormal findings on diagnostic imaging of lung	0.4938	0.2907	0.08937	361194	UK Biobank
Other arthritis (FG)	0.1237	0.163	0.4479	361194	UK Biobank
Diagnoses - main ICD10: S01 Open wound of head	0.005208	0.1929	0.9785	361194	UK Biobank
Diagnoses - main ICD10: S09 Other and unspecified injuries of head	0.1733	0.1301	0.1827	361194	UK Biobank
Diagnoses - main ICD10: S42 Fracture of shoulder and upper arm	-0.09302	0.181	0.6073	361194	UK Biobank
Diagnoses - main ICD10: S52 Fracture of forearm	0.003943	0.1312	0.976	361194	UK Biobank
Diagnoses - main ICD10: S62 Fracture at wrist and hand level	0.1985	0.1938	0.3057	361194	UK Biobank
Diagnoses - main ICD10: S66 Injury of muscle and tendon at wrist and hand level	-0.2551	0.2277	0.2625	361194	UK Biobank
Diagnoses - main ICD10: S82 Fracture of lower leg, including ankle	0.1966	0.1644	0.2317	361194	UK Biobank
Sleep disorders (combined)	0.3955	0.1413	0.005142	361194	UK Biobank
Spondylopathies (FG)	-0.04978	0.2005	0.8039	361194	UK Biobank
Diagnoses - main ICD10: T39 Poisoning by nonopioid analgesics, antipyretics and antirheumatics	0.733	0.2469	0.002989	361194	UK Biobank
Diagnoses - main ICD10: T50 Poisoning by diuretics and other and unspecified drugs, medicaments and biological substances	0.2722	0.1876	0.1467	361194	UK Biobank
Diagnoses - main ICD10: T81 Complications of procedures, not elsewhere classified	0.3603	0.1306	0.005816	361194	UK Biobank
Diagnoses - main ICD10: T84 Complications of internal orthopaedic prosthetic devices, implants and grafts	0.03312	0.124	0.7895	361194	UK Biobank
Diagnoses - main ICD10: T86 Failure and rejection of transplanted organs and tissues	0.05009	0.1721	0.771	361194	UK Biobank
Ulcerative colitis, NAS	0.004293	0.1051	0.9674	361194	UK Biobank
Mental and behavioural disorders	0.375	0.1083	0.0005354	361194	UK Biobank
Diseases of the nervous system	0.4945	0.08637	1.031e-08	361194	UK Biobank
Diseases of the eye and adnexa	-0.02151	0.08503	0.8003	361194	UK Biobank
Diseases of the ear and mastoid process	0.2834	0.1655	0.08686	361194	UK Biobank
Diseases of the respiratory system	0.4139	0.1063	9.891e-05	361194	UK Biobank
Diseases of the skin and subcutaneous tissue	0.2626	0.14	0.06073	361194	UK Biobank
Diseases of the musculoskeletal system and connective tissue	0.2197	0.07037	0.001796	361194	UK Biobank
Diseases of the genitourinary system	0.2369	0.08165	0.003712	361194	UK Biobank
Injury, poisoning and certain other consequences of external causes	0.3153	0.07998	8.069e-05	361194	UK Biobank
Pregnancy, childbirth and the puerperium	-0.05838	0.1728	0.7356	361194	UK Biobank
Symptoms, signs and abnormal clinical and laboratory findings, not elsewhere classified	0.6089	0.06967	2.335e-18	361194	UK Biobank
Factors influencing health status and contact with health services	0.2736	0.09783	0.005163	361194	UK Biobank
Diagnoses - main ICD10: Z03 Medical observation and evaluation for suspected diseases and conditions	0.3107	0.1775	0.07996	361194	UK Biobank
Diagnoses - main ICD10: Z09 Follow-up examination after treatment for conditions other than malignant neoplasms	0.2529	0.1167	0.03021	361194	UK Biobank
Diagnoses - main ICD10: Z36 Antenatal screening	-0.07124	0.1351	0.598	361194	UK Biobank
Diagnoses - main ICD10: Z42 Follow-up care involving plastic surgery	0.06218	0.1588	0.6954	361194	UK Biobank
Diagnoses - main ICD10: Z47 Other orthopaedic follow-up care	0.03197	0.1455	0.8261	361194	UK Biobank
Crohn's disease (CD)	-0.01021	0.05816	0.8607	40266	IIBDGC + UK
Crohn's disease (CD)	0.03757	0.07139	0.5987	20883	IIBDGC
Poor prognosis in Crohn's disease	-0.08673	0.1714	0.6128	2734	European
Multisite chronic pain	0.505	0.05406	9.505e-21	380000	UK Biobank
Schizophrenia	0.2665	0.04735	1.822e-08	150064	PGC
Cognitive Performance	-0.1603	0.04612	0.0005096	257841	SSGAC
COPD (EUR Biobanks)	0.4548	0.06224	2.738e-13	995917	Global Biobank Meta-analysis Initiative Meta-analysis Initiative: powering genetic discovery across human diseases. 2029
COPD (All Biobanks)	0.4418	0.0599	1.645e-13	1392366	Global Biobank Meta-analysis Initiative Meta-analysis Initiative: powering genetic discovery across human diseases. 2030
Cutaneous T-cell-attracting chemokine	NA	NA	NA	8293	Young Finns Study (YFS)
Diagnoses - main ICD10: D22 Melanocytic naevi	-0.0438	0.2184	0.8411	361194	UK Biobank
Bipolar Disorder	0.331	0.05485	1.594e-09	51710	Psychiatric Genomics Consortium
Decayed, Missing and Filled tooth Surfaces (DMFS) + Dentures	0.179	0.05307	0.0007452	487823	UK Biobank + GLIDE
Educational Attainment	-0.2139	0.03679	6.096e-09	766000	SSGAC
Intracranial volume (ICV)	-0.09228	0.135	0.4944	30717	ENIGMA
Accumbens volume	0.006984	0.1722	0.9677	30718	ENIGMA
Amygdala volume	NA	NA	NA	30719	ENIGMA
Caudate volume	0.06199	0.1023	0.5443	30720	ENIGMA
Hippocampus volume	-0.02732	0.1368	0.8417	30721	ENIGMA
Pallidum volume	0.0006183	0.1241	0.996	30722	ENIGMA
Putamen volume	0.08151	0.09302	0.3809	30723	ENIGMA
Thalamus volume	0.08848	0.1405	0.5289	30724	ENIGMA
Sum eosinophil basophil counts	0.04655	0.04656	0.3174	173480	UK Biobank and INTERVAL
Eosinophil count	0.03146	0.04778	0.5103	173481	UK Biobank and INTERVAL
Eosinophil percentage of granulocytes	-0.0001104	0.05144	0.9983	173482	UK Biobank and INTERVAL
Eosinophil percentage of white cells	-0.003097	0.05011	0.9507	173483	UK Biobank and INTERVAL
Eotaxin	0.3888	0.2484	0.1175	8293	Young Finns Study (YFS)
Bleeding gums	0.1755	0.06361	0.005798	461031	UK Biobank
Dentures	0.1714	0.05449	0.001652	461031	UK Biobank
Loose teeth	0.5366	0.08787	1.014e-09	461031	UK Biobank
Painful gums	0.5275	0.1159	5.296e-06	461031	UK Biobank
Toothache	0.5274	0.1135	3.364e-06	461031	UK Biobank
Mouth ulcers	0.2457	0.06231	8.011e-05	461031	UK Biobank
Fibroblast growth factor (FGF-basic)	NA	NA	NA	8293	Young Finns Study (YFS)
Granulocyte-colony stimulating factor	NA	NA	NA	8293	Young Finns Study (YFS)
Systemic lupus erythematosus	0.06165	0.08432	0.4647	30604	Eeast Asian and European
Gout (EUR Biobanks)	0.06993	0.05687	0.2188	1051653	Global Biobank Meta-analysis Initiative Meta-analysis Initiative: powering genetic discovery across human diseases. 2031
Gout (All Biobanks)	0.07848	0.05357	0.143	1485233	Global Biobank Meta-analysis Initiative Meta-analysis Initiative: powering genetic discovery across human diseases. 2032
Granulocyte count	0.1037	0.05138	0.04358	173484	UK Biobank and INTERVAL
Granulocyte percentage of myeloid white cells	0.008141	0.04751	0.8639	173485	UK Biobank and INTERVAL
Growth-Regulated Oncogene-alpha (GROa)	NA	NA	NA	8293	Young Finns Study (YFS)
Cardiomyopathy(hypertrophic, obstructive) (HCM) (EUR Biobanks)	NA	NA	NA	922988	Global Biobank Meta-analysis Initiative Meta-analysis Initiative: powering genetic discovery across human diseases. 2033
Cardiomyopathy(hypertrophic, obstructive) (HCM) (All Biobanks)	0.5044	0.5667	0.3734	1193060	Global Biobank Meta-analysis Initiative Meta-analysis Initiative: powering genetic discovery across human diseases. 2034
Hematocrit	0.132	0.04153	0.001478	173486	UK Biobank and INTERVAL
Heart Failure (HF) (EUR Biobanks)	0.2355	0.07081	0.000882	1020441	Global Biobank Meta-analysis Initiative Meta-analysis Initiative: powering genetic discovery across human diseases. 2035
Heart Failure (HF) (All Biobanks)	0.2021	0.06622	0.002273	1354739	Global Biobank Meta-analysis Initiative Meta-analysis Initiative: powering genetic discovery across human diseases. 2036
Hemoglobin concentration	0.1149	0.04405	0.009081	173487	UK Biobank and INTERVAL
Hepatocyte growth factor (HGF)	NA	NA	NA	8293	Young Finns Study (YFS)
High light scatter reticulocyte count	0.05827	0.04883	0.2327	173488	UK Biobank and INTERVAL
High light scatter reticulocyte percentage of red cells	0.04882	0.04918	0.3208	173489	UK Biobank and INTERVAL
CD (EAS) 2023	0.05389	0.06987	0.4405	22828	IIBDGC
CD (EUR) 2023	-0.01174	0.0591	0.8425	40266	IIBDGC
IBD (EAS) 2023	0.08766	0.06598	0.184	29849	IIBDGC
IBD (EUR) 2023	-0.05084	0.06243	0.4154	59957	IIBDGC
UC (EAS) 2023	0.07104	0.07683	0.3552	22318	IIBDGC
UC (EUR) 2023	-0.1039	0.07655	0.1747	45975	IIBDGC
Inflammatory bowel disease (IBD)	-0.04343	0.06051	0.4729	53124	IIBDGC + UK
Inflammatory bowel disease (IBD)	0.01141	0.07073	0.8718	34652	IIBDGC
Interferon-gamma	-0.03061	0.2837	0.9141	8293	Young Finns Study (YFS)
IL10	NA	NA	NA	8293	Young Finns Study (YFS)
IL12p70	NA	NA	NA	8293	Young Finns Study (YFS)
IL13	NA	NA	NA	8293	Young Finns Study (YFS)
IL16	NA	NA	NA	8293	Young Finns Study (YFS)
IL17	NA	NA	NA	8293	Young Finns Study (YFS)
IL18	-0.151	0.3317	0.6489	8293	Young Finns Study (YFS)
IL1b	NA	NA	NA	8293	Young Finns Study (YFS)
IL2	NA	NA	NA	8293	Young Finns Study (YFS)
IL2ra	-0.3149	0.785	0.6883	8293	Young Finns Study (YFS)
IL5	NA	NA	NA	8293	Young Finns Study (YFS)
IL6	NA	NA	NA	8293	Young Finns Study (YFS)
IL7	NA	NA	NA	8293	Young Finns Study (YFS)
IL8	NA	NA	NA	8293	Young Finns Study (YFS)
IL9	NA	NA	NA	8293	Young Finns Study (YFS)
Interferon gamma-induced Protein 10 (IP10)	0.3775	0.324	0.244	8293	Young Finns Study (YFS)
IPF (EUR Biobanks)	0.07775	0.1045	0.4569	953873	Global Biobank Meta-analysis Initiative
IPF (All Biobanks)	0.08532	0.0996	0.3917	1254748	Global Biobank Meta-analysis Initiative
IPF (All Biobanks + Allen et al)	0.06688	0.08152	0.412	1375570	Global Biobank Meta-analysis Initiative
Immature fraction of reticulocytes	0.03746	0.05501	0.4958	173490	UK Biobank and INTERVAL
High-density lipoprotein (HDL)	-0.02926	0.05703	0.6078	188577	GLGC
Low-density lipoprotein (LDL)	-0.04754	0.06235	0.4457	188578	GLGC
Total cholesterol	-0.0174	0.05641	0.7578	188579	GLGC
Triglycerides	0.128	0.04906	0.009075	188580	GLGC
Crohns 2023	0.005353	0.05163	0.9174	367592	IIBDGC
Inflammatory bowel disease 2023	-0.005467	0.05458	0.9202	398668	IIBDGC
Ulcerative Colitis 2023	-0.02745	0.06308	0.6635	375508	IIBDGC
Lymphocyte count	0.0844	0.0446	0.05843	173495	UK Biobank and INTERVAL
Lymphocyte percentage of white cells	-0.003199	0.04927	0.9482	173496	UK Biobank and INTERVAL
Mean corpuscular hemoglobin	0.04786	0.04476	0.285	173498	UK Biobank and INTERVAL
Mean corpuscular hemoglobin concentration	-0.03236	0.05507	0.5569	173497	UK Biobank and INTERVAL
Monocyte Chemotactic Protein-1 (MCP1)	-0.1104	0.1894	0.56	8293	Young Finns Study (YFS)
Monocyte Chemotactic Protein-3 (MCP3)	NA	NA	NA	8293	Young Finns Study (YFS)
Macrophage Colony-Stimulating Factor (M-CSF)	NA	NA	NA	8293	Young Finns Study (YFS)
Mean corpuscular volume	0.07098	0.04217	0.09238	173499	UK Biobank and INTERVAL
Macrophage migration Inhibitory Factor (MIF)	-0.1768	0.3371	0.6001	8293	Young Finns Study (YFS)
Monokine Induced by gamma (MIG)	NA	NA	NA	8293	Young Finns Study (YFS)
Macrophage Inflammatory Protein-1alpha	NA	NA	NA	8293	Young Finns Study (YFS)
Macrophage Inflammatory Protein-1beta	NA	NA	NA	8293	Young Finns Study (YFS)
Monocyte count	0.08876	0.05305	0.09427	173500	UK Biobank and INTERVAL
Monocyte percentage of white cells	-0.006339	0.04653	0.8916	173501	UK Biobank and INTERVAL
Mean platelet volume	0.01758	0.04167	0.6731	173502	UK Biobank and INTERVAL
Myeloid white cell count	0.1059	0.05167	0.04045	173503	UK Biobank and INTERVAL
Sum neutrophil eosinophil counts	0.1058	0.05158	0.04028	173504	UK Biobank and INTERVAL
Neutrophil count	0.1044	0.05171	0.04348	173505	UK Biobank and INTERVAL
Neutrophil percentage of granulocytes	-0.002072	0.04991	0.9669	173506	UK Biobank and INTERVAL
Neutrophil percentage of white cells	0.006174	0.05086	0.9034	173507	UK Biobank and INTERVAL
Plateletcrit	-0.03139	0.04355	0.471	173508	UK Biobank and INTERVAL
Platelet Derived Growth Factor BB	0.2248	0.4603	0.6252	8293	Young Finns Study (YFS)
Platelet distribution width	-0.03505	0.05117	0.4934	173509	UK Biobank and INTERVAL
Periodontitis + loose teeth	0.4257	0.09631	9.849e-06	506594	UK Biobank +GLIDE
Platelet count	-0.0325	0.04197	0.4387	173510	UK Biobank and INTERVAL
POAG (EUR Biobanks)	0.08121	0.06962	0.2434	1172905	Global Biobank Meta-analysis Initiative Meta-analysis Initiative: powering genetic discovery across human diseases. 2037
POAG (All Biobanks)	0.09541	0.06222	0.1252	1487447	Global Biobank Meta-analysis Initiative Meta-analysis Initiative: powering genetic discovery across human diseases. 2038
RANTES	0.0009507	0.2529	0.997	8293	Young Finns Study (YFS)
Red blood cell count	0.04211	0.04221	0.3184	173511	UK Biobank and INTERVAL
Red cell distribution width	-0.06743	0.05181	0.1931	173512	UK Biobank and INTERVAL
Reticulocyte count	0.06602	0.04649	0.1556	173513	UK Biobank and INTERVAL
Reticulocyte fraction of red cells	0.05608	0.04755	0.2382	173514	UK Biobank and INTERVAL
Stem Cell Factor	NA	NA	NA	8293	Young Finns Study (YFS)
Stem Cell Growth Factor beta	-0.1189	0.3102	0.7015	8293	Young Finns Study (YFS)
Stromal Cell-Derived Factor 1alpha	-0.02235	0.2759	0.9354	8293	Young Finns Study (YFS)
Stroke (EUR Biobanks)	0.29	0.09547	0.002387	1039382	Global Biobank Meta-analysis Initiative Meta-analysis Initiative: powering genetic discovery across human diseases. 2039
Stroke (All Biobanks)	0.261	0.07902	0.0009542	1370901	Global Biobank Meta-analysis Initiative Meta-analysis Initiative: powering genetic discovery across human diseases. 2040
Thyroid cancer (ThC) (EUR Biobanks)	-0.1335	0.08742	0.1268	1339769	Global Biobank Meta-analysis Initiative Meta-analysis Initiative: powering genetic discovery across human diseases. 2041
Thyroid cancer (ThC) (All Biobanks)	-0.1332	0.08059	0.0983	1620354	Global Biobank Meta-analysis Initiative Meta-analysis Initiative: powering genetic discovery across human diseases. 2042
Tumor necrosis factor alpha	NA	NA	NA	8293	Young Finns Study (YFS)
Tumor necrosis factor beta	NA	NA	NA	8293	Young Finns Study (YFS)
TNF-Related Apoptosis-Inducing Ligand	NA	NA	NA	8293	Young Finns Study (YFS)
Ulcerative colitis (UC)	-0.09301	0.07469	0.2131	40438	IIBDGC + UK
Ulcerative colitis (UC)	-0.05477	0.08314	0.5101	27432	IIBDGC
Crohn's disease vs ulcerative colitis	0.1283	0.1033	0.214	12924	European
Vascular Endothelial Growth Factor	NA	NA	NA	8293	Young Finns Study (YFS)
VTE (EUR Biobanks)	0.1233	0.06304	0.0504	915868	Global Biobank Meta-analysis Initiative Meta-analysis Initiative: powering genetic discovery across human diseases. 2043
VTE (All Biobanks)	0.1155	0.06311	0.06717	1063277	Global Biobank Meta-analysis Initiative Meta-analysis Initiative: powering genetic discovery across human diseases. 2044
White blood cell count	0.1203	0.04928	0.01466	173515	UK Biobank and INTERVAL

## Sheet: Genetic causal associations
phenotype	rg	rg_se	rg_p	gcp	gcp_se	gcp_p	gcp_p_adj	gcp_zscore	N	cohort
Tea intake	0.178733	0.0597177	0.00276283	0.0209627	0.576905	0.971014	0.999831	0.000211781	349376	UK Biobank
Back pain	0.517065	0.0578291	3.84762e-19	-0.417406	0.375085	0.265782	0.731284	0.343418	509000	UK Biobank + CHARGE
Ever smoked	0.314435	0.0919073	0.000623405	0.174106	0.464668	0.707892	0.999831	0.000211781	74053	Tobacco and Genetics Consortium
Major Depresive Disorder	0.859164	0.0665557	4.00749e-38	-0.29043	0.517913	0.574954	0.985619	0.0180243	480359	Psychiatric Genomics Consortium
Depression	0.869455	0.0554681	2.24656e-55	-0.21311	0.534981	0.690372	0.999831	0.000211781	670257	MVP+UKB+FinnGen
MVP Cannabis Meta	0.415249	0.0587731	1.60279e-12	-0.569974	0.281799	0.043112	0.288405	1.06163	161053	Million Veteran Program, PGC, iPSYCH and MGH
cystatin-based estimated glomerular filtration rate (eGFR	-0.121748	0.0447302	0.00649231	0.247907	0.473035	0.600225	0.999831	0.000211781	460826	CKDGen Consortium
Atopic Dermatitis	0.214925	0.0741226	0.00373649	-0.0182056	0.58151	0.975024	0.999831	0.000211781	864982	European individuals
Squamous Cell Carcinoma	-0.16215	0.0513724	0.00159749	-0.23291	0.464768	0.616278	0.999831	0.000211781	635331	UKBB+Qskin+eMERGE
Townsend deprivation index at recruitment	0.509271	0.0658357	1.03001e-14	-0.435217	0.355036	0.220259	0.685951	0.404356	360763	UK Biobank
Speech-reception-threshold (SRT) estimate (left)	0.300021	0.10984	0.00630565	0.263526	0.349939	0.451413	0.875869	0.156208	114811	UK Biobank
Speech-reception-threshold (SRT) estimate (right)	0.31774	0.119265	0.00771846	0.474479	0.3697	0.199346	0.668443	0.428285	114720	UK Biobank
Neuroticism score	0.659478	0.0579128	4.83069e-30	-0.388049	0.36309	0.285186	0.755154	0.31185	293006	UK Biobank
Age at first episode of depression	-0.502348	0.116015	1.49099e-05	-0.646959	0.254271	0.0109474	0.0943907	1.67268	61033	UK Biobank
Age at last episode of depression	0.49399	0.127864	0.000111813	-0.245189	0.376876	0.515315	0.940821	0.0742377	59260	UK Biobank
Age first had sexual intercourse	-0.270771	0.088455	0.00220514	-0.326399	0.223348	0.143908	0.541749	0.61017	317694	UK Biobank
Year ended full time education	-0.333275	0.0715581	3.20233e-06	-0.18014	0.253301	0.47698	0.898389	0.127697	91777	UK Biobank
Body fat percentage	0.154413	0.0462915	0.000850979	-0.314213	0.410811	0.444354	0.875869	0.156208	354628	UK Biobank
Leg fat percentage (right)	0.195375	0.0528391	0.000217688	-0.356114	0.315765	0.259413	0.731284	0.343418	354811	UK Biobank
Leg fat percentage (left)	0.194444	0.0527112	0.000225259	-0.258517	0.271477	0.340965	0.811902	0.237973	354791	UK Biobank
Arm fat percentage (right)	0.135303	0.052731	0.0102908	-0.410075	0.392129	0.295668	0.76936	0.293212	354760	UK Biobank
Trunk fat percentage	0.13433	0.042187	0.00145172	-0.202364	0.4998	0.685559	0.999831	0.000211781	354619	UK Biobank
Trunk fat mass	0.112113	0.0449492	0.0126233	-0.265761	0.4323	0.538714	0.958811	0.0516452	354597	UK Biobank
Nitrogen oxides air pollution; 2010	0.344475	0.111337	0.00197496	0.447941	0.341964	0.190228	0.662256	0.4368	356078	UK Biobank
Particulate matter air pollution (pm2.5); 2010	0.453936	0.104749	1.46708e-05	0.255242	0.467499	0.585083	0.99132	0.0108788	329886	UK Biobank
Age at first live birth	-0.355164	0.0829168	1.84078e-05	-0.587746	0.26393	0.0259539	0.197453	1.28884	131987	UK Biobank
White blood cell (leukocyte) count	0.281551	0.0523906	7.69779e-08	0.0127414	0.562229	0.98192	0.999831	0.000211781	350470	UK Biobank
Haemoglobin concentration	0.145926	0.0484321	0.00258681	0.165067	0.479438	0.730626	0.999831	0.000211781	350474	UK Biobank
Haematocrit percentage	0.147591	0.0490918	0.00264342	-0.403735	0.200778	0.0443405	0.291595	1.05463	350475	UK Biobank
Lymphocyte count	0.278292	0.0602524	3.86009e-06	-0.280997	0.304854	0.356662	0.818053	0.23005	349856	UK Biobank
Monocyte count	0.23815	0.054562	1.27266e-05	0.271665	0.458507	0.553516	0.966499	0.0420002	349856	UK Biobank
Neutrophill count	0.21443	0.0565813	0.000150782	0.175508	0.490846	0.720672	0.999831	0.000211781	349856	UK Biobank
Reticulocyte count	0.155405	0.0582506	0.00763353	-0.0681859	0.279752	0.807434	0.999831	0.000211781	344729	UK Biobank
Immature reticulocyte fraction	0.189179	0.0576724	0.00103722	-0.631973	0.23753	0.00780005	0.0738151	1.78776	344728	UK Biobank
High light scatter reticulocyte percentage	0.150657	0.0603073	0.012484	-0.0217925	0.591878	0.970629	0.999831	0.000211781	344729	UK Biobank
High light scatter reticulocyte count	0.183439	0.0524282	0.000467251	-0.453075	0.288826	0.116723	0.486972	0.695133	344729	UK Biobank
Sodium in urine	0.206494	0.0569873	0.000290622	0.127935	0.179183	0.475233	0.898389	0.127697	350061	UK Biobank
Vitamin D (quantile) both_sexes	-0.179536	0.0580262	0.00197439	-0.750036	0.183468	4.3492e-05	0.000908525	3.31742	400000	UK Biobank
Mother's age at death	-0.334679	0.131618	0.0109963	0.318472	0.371666	0.391513	0.822168	0.224758	213636	UK Biobank
Age at menopause (last menstrual period)	-0.215835	0.0641512	0.000766896	-0.650617	0.219151	0.00298959	0.0331418	2.13036	111593	UK Biobank
Number of incorrect matches in round	0.194517	0.0556036	0.000468279	-0.181593	0.308179	0.555697	0.966499	0.0420002	360686	UK Biobank
Signal-to-noise-ratio (SNR) of triplet (left)	0.281569	0.110545	0.0108621	0.303705	0.312252	0.330738	0.811412	0.238605	116790	UK Biobank
Signal-to-noise-ratio (SNR) of triplet (right)	0.357092	0.115092	0.0019178	-0.276363	0.28311	0.32898	0.811412	0.238605	116755	UK Biobank
Duration screen displayed	0.213859	0.0842563	0.0111424	0.625361	0.238594	0.00876644	0.0809852	1.745	119729	UK Biobank
Waist circumference	0.151594	0.0439642	0.000564496	-0.44635	0.337219	0.185629	0.654764	0.447154	360564	UK Biobank
ECG, load	-0.680218	0.180788	0.000168218	-0.85041	0.133729	2.02786e-10	1.57362e-08	5.65334	53843	UK Biobank
ECG, phase time	-0.749774	0.191099	8.72771e-05	-0.66834	0.270474	0.013474	0.111232	1.59268	53998	UK Biobank
Abdominal aortic aneurysm (AAA) (EUR Biobanks)	0.273855	0.0889238	0.00207239	-0.179767	0.409578	0.660728	0.999831	0.000211781	1264918	Global Biobank Meta-analysis Initiative Meta-analysis Initiative: powering genetic discovery across human diseases. 2022
Abdominal aortic aneurysm (AAA) (All Biobanks)	0.261417	0.082819	0.0015968	-0.537821	0.464036	0.246454	0.731284	0.343418	1455875	Global Biobank Meta-analysis Initiative Meta-analysis Initiative: powering genetic discovery across human diseases. 2023
ADHD	0.486462	0.0873828	2.59136e-08	-0.54674	0.297607	0.0661918	0.401288	0.839323	55374	PGC
Asthma (EUR Biobanks)	0.333176	0.0665247	5.49128e-07	0.261475	0.393373	0.506241	0.935341	0.0811272	1376071	Global Biobank Meta-analysis Initiative Meta-analysis Initiative: powering genetic discovery across human diseases. 2026
Asthma (All Biobanks)	0.323737	0.0644601	5.10597e-07	0.225145	0.428841	0.599577	0.999831	0.000211781	1800785	Global Biobank Meta-analysis Initiative Meta-analysis Initiative: powering genetic discovery across human diseases. 2027
Yogurt/ice-cream consumers	-0.379137	0.138766	0.00629113	-0.00855538	0.579153	0.988214	0.999831	0.000211781	51427	UK Biobank
Vegetable consumers	-0.430498	0.173366	0.0130216	-0.600572	0.141573	2.2141e-05	0.000505335	3.47791	51427	UK Biobank
Fruit consumers	-0.391871	0.142808	0.00606873	-0.0260302	0.673021	0.969148	0.999831	0.000211781	51427	UK Biobank
Snoring	-0.16784	0.0639429	0.00866912	-0.0282297	0.570663	0.960546	0.999831	0.000211781	336320	UK Biobank
Milk type used: Soya	0.392342	0.105882	0.000210998	-0.567469	0.204822	0.00559637	0.0571344	1.90228	360806	UK Biobank
Bread type: White	0.192008	0.0632105	0.00238478	-0.0887702	0.533508	0.86785	0.999831	0.000211781	348424	UK Biobank
Bread type: Wholemeal or wholegrain	-0.182086	0.0628731	0.00377857	0.280208	0.359064	0.435166	0.870587	0.162913	348424	UK Biobank
Cereal type: Muesli	-0.209693	0.0670448	0.00176205	-0.167624	0.25987	0.518907	0.940821	0.0742377	299898	UK Biobank
Major dietary changes in the last 5 years: No	-0.401657	0.0707164	1.34828e-08	-0.237884	0.30641	0.437537	0.870587	0.162913	360294	UK Biobank
Major dietary changes in the last 5 years: Yes, because of illness	0.452749	0.0652817	4.0533e-12	-0.353615	0.321472	0.271337	0.731284	0.343418	360294	UK Biobank
Major dietary changes in the last 5 years: Yes, because of other reasons	0.248254	0.0907756	0.00624158	0.201773	0.45475	0.657258	0.999831	0.000211781	360294	UK Biobank
Alcohol usually taken with meals	-0.238472	0.0621603	0.000124845	-0.449848	0.266121	0.0909534	0.470532	0.721613	184716	UK Biobank
Maternal smoking around birth	0.32691	0.054384	1.84225e-09	-0.442234	0.34893	0.205012	0.668443	0.428285	309942	UK Biobank
Mood swings	0.666584	0.0646795	6.62292e-25	-0.554216	0.322288	0.0854996	0.448295	0.75826	352604	UK Biobank
Miserableness	0.679304	0.05803	1.18647e-31	-0.367206	0.399845	0.358425	0.818053	0.23005	355182	UK Biobank
Irritability	0.490527	0.0663438	1.42772e-13	-0.642103	0.263553	0.014837	0.117485	1.56542	345231	UK Biobank
Sensitivity / hurt feelings	0.455069	0.0664285	7.35871e-12	-0.464432	0.311228	0.135632	0.518548	0.645585	350821	UK Biobank
Fed-up feelings	0.596346	0.0620972	7.7324e-22	-0.450828	0.368353	0.220989	0.685951	0.404356	353764	UK Biobank
Nervous feelings	0.494202	0.0688343	6.99172e-13	0.43746	0.269316	0.104304	0.486972	0.695133	351829	UK Biobank
Worrier / anxious feelings	0.414681	0.0717184	7.37847e-09	-0.0246374	0.234731	0.916408	0.999831	0.000211781	351833	UK Biobank
Tense / 'highly strung'	0.596975	0.0655701	8.67683e-20	-0.13089	0.364057	0.719197	0.999831	0.000211781	350159	UK Biobank
Worry too long after embarrassment	0.35147	0.0796946	1.03267e-05	-0.262648	0.247277	0.288162	0.755452	0.311459	346527	UK Biobank
Non-cancer illness code, self-reported: heart attack/myocardial infarction	0.3263	0.0719139	5.69608e-06	-0.52964	0.297172	0.0747055	0.405135	0.832485	361141	UK Biobank
Non-cancer illness code, self-reported: stroke	0.637111	0.19874	0.00134709	-0.721348	0.216681	0.000871325	0.0116577	2.52234	361141	UK Biobank
Non-cancer illness code, self-reported: asthma	0.235951	0.0676127	0.000483482	0.179348	0.486308	0.712281	0.999831	0.000211781	361141	UK Biobank
Non-cancer illness code, self-reported: emphysema/chronic bronchitis	0.372616	0.148598	0.0121577	-0.303484	0.4216	0.471625	0.898389	0.127697	361141	UK Biobank
Non-cancer illness code, self-reported: irritable bowel syndrome	0.641885	0.159736	5.85886e-05	-0.332332	0.440632	0.450719	0.875869	0.156208	361141	UK Biobank
Non-cancer illness code, self-reported: cholelithiasis/gall stones	0.283772	0.0946679	0.00272154	-0.577144	0.273211	0.0346481	0.250603	1.14888	361141	UK Biobank
Non-cancer illness code, self-reported: diabetes	0.226563	0.0708471	0.00138421	-0.676479	0.209306	0.00122923	0.0149044	2.43469	361141	UK Biobank
Non-cancer illness code, self-reported: depression	0.835215	0.0923137	1.46183e-19	-0.0690282	0.559141	0.901748	0.999831	0.000211781	361141	UK Biobank
Non-cancer illness code, self-reported: anxiety/panic attacks	0.686105	0.149896	4.71217e-06	0.0662123	0.555272	0.905083	0.999831	0.000211781	361141	UK Biobank
Non-cancer illness code, self-reported: back problem	0.461428	0.160899	0.00413325	-0.311057	0.415945	0.454561	0.876478	0.155435	361141	UK Biobank
Non-cancer illness code, self-reported: pneumonia	0.816309	0.330022	0.0133797	-0.662789	0.262735	0.0116472	0.0982417	1.65344	361141	UK Biobank
Non-cancer illness code, self-reported: diverticular disease/diverticulitis	0.33203	0.0915194	0.000285659	0.355911	0.406395	0.381151	0.822168	0.224758	361141	UK Biobank
Non-cancer illness code, self-reported: osteoarthritis	0.308242	0.0828486	0.000198793	0.00270745	0.268881	0.991966	0.999831	0.000211781	361141	UK Biobank
Non-cancer illness code, self-reported: hiatus hernia	0.348738	0.0937635	0.000199747	0.392745	0.383467	0.305743	0.785617	0.272007	361141	UK Biobank
Non-cancer illness code, self-reported: cervical spondylosis	0.443034	0.145849	0.00238461	-0.800868	0.153644	1.86308e-07	9.03592e-06	4.43904	361141	UK Biobank
Treatment/medication code: diazepam	0.626083	0.243193	0.0100405	-0.71878	0.219015	0.0010312	0.0129066	2.48634	361141	UK Biobank
Treatment/medication code: lansoprazole	0.36573	0.0996547	0.000242576	0.0637989	0.37093	0.86344	0.999831	0.000211781	361141	UK Biobank
Treatment/medication code: tramadol	0.362806	0.119314	0.00235981	-0.163013	0.340696	0.632316	0.999831	0.000211781	361141	UK Biobank
Treatment/medication code: omeprazole	0.549597	0.0936766	4.43859e-09	0.134379	0.528556	0.799312	0.999831	0.000211781	361141	UK Biobank
Treatment/medication code: aspirin	0.286491	0.085161	0.000767911	0.251078	0.267587	0.348088	0.818053	0.23005	361141	UK Biobank
Treatment/medication code: ibuprofen	0.416204	0.0912602	5.10013e-06	-0.177217	0.158949	0.264882	0.731284	0.343418	361141	UK Biobank
Treatment/medication code: ranitidine	0.460593	0.13777	0.000828173	-0.698778	0.210868	0.000920338	0.011903	2.51501	361141	UK Biobank
Treatment/medication code: fluoxetine	0.78173	0.19129	4.37704e-05	0.0182834	0.578936	0.974806	0.999831	0.000211781	361141	UK Biobank
Treatment/medication code: amitriptyline	0.329648	0.105634	0.00180442	-0.345063	0.341977	0.312962	0.793656	0.261566	361141	UK Biobank
Treatment/medication code: salbutamol	0.403831	0.141414	0.00429455	0.00390256	0.579317	0.994625	0.999831	0.000211781	361141	UK Biobank
Treatment/medication code: codeine	0.414336	0.156274	0.00801705	-0.183737	0.445199	0.679821	0.999831	0.000211781	361141	UK Biobank
Treatment/medication code: cod liver oil capsule	-0.655318	0.221412	0.00307921	-0.786981	0.17235	4.96691e-06	0.000158763	3.77695	361141	UK Biobank
Treatment/medication code: citalopram	0.783051	0.185038	2.31784e-05	-0.00134796	0.580256	0.998146	0.999831	0.000211781	361141	UK Biobank
Treatment/medication code: co-codamol	0.432575	0.0962651	7.00356e-06	0.117592	0.470646	0.802702	0.999831	0.000211781	361141	UK Biobank
Treatment/medication code: valsartan	0.357768	0.134704	0.00790822	-0.458652	0.327671	0.161594	0.592025	0.535904	361141	UK Biobank
Treatment/medication code: seretide 50 evohaler	0.244197	0.097265	0.0120513	0.216047	0.470402	0.646032	0.999831	0.000211781	361141	UK Biobank
Treatment/medication code: rosiglitazone	0.352385	0.140313	0.0120247	-0.900019	0.210383	1.88577e-05	0.0004573	3.5046	361141	UK Biobank
Treatment/medication code: paracetamol	0.351536	0.0713897	8.47115e-07	-0.344186	0.402099	0.392013	0.822168	0.224758	361141	UK Biobank
Suffer from 'nerves'	0.531052	0.0695698	2.2868e-14	-0.0802746	0.344486	0.81574	0.999831	0.000211781	348082	UK Biobank
Illnesses of father: Heart disease	0.244534	0.0689222	0.000388216	0.265831	0.416255	0.523066	0.942955	0.0715564	318570	UK Biobank
Illnesses of father: None of the above (group 1)	-0.377158	0.119122	0.00154465	0.0198782	0.46701	0.966048	0.999831	0.000211781	314797	UK Biobank
Illnesses of father: Severe depression	0.738462	0.168936	1.23537e-05	-0.548235	0.338646	0.105468	0.486972	0.695133	312437	UK Biobank
Illnesses of father: Stroke	0.454902	0.167123	0.00648952	-0.627867	0.243648	0.00996789	0.0878987	1.70659	314801	UK Biobank
Illnesses of father: Chronic bronchitis/emphysema	0.491664	0.101045	1.14006e-06	0.0531923	0.563866	0.924843	0.999831	0.000211781	314680	UK Biobank
Illnesses of mother: Heart disease	0.301715	0.0926443	0.00112714	-0.486225	0.324205	0.133681	0.518548	0.645585	332966	UK Biobank
Illnesses of mother: None of the above (group 1)	-0.263576	0.0897448	0.00331455	0.147792	0.294603	0.615902	0.999831	0.000211781	332611	UK Biobank
Illnesses of mother: None of the above (group 2)	-0.407023	0.124949	0.00112396	-0.72181	0.202924	0.000375038	0.00606312	2.74435	334401	UK Biobank
Illnesses of mother: Severe depression	0.88874	0.134617	4.05717e-11	-0.707505	0.270855	0.00899836	0.0811945	1.7438	330653	UK Biobank
Illnesses of mother: Chronic bronchitis/emphysema	0.406049	0.110005	0.000223222	-0.665906	0.227513	0.0034237	0.0368999	2.08687	331008	UK Biobank
Illnesses of mother: Diabetes	0.220158	0.0794364	0.00557991	0.428596	0.314329	0.172716	0.620499	0.495143	331142	UK Biobank
Illnesses of siblings: Heart disease	0.48905	0.0849989	8.73598e-09	-0.504461	0.317205	0.11176	0.486972	0.695133	280784	UK Biobank
Illnesses of siblings: None of the above (group 1)	-0.365726	0.0729482	5.3448e-07	-0.355307	0.366649	0.332512	0.811412	0.238605	281979	UK Biobank
Illnesses of siblings: None of the above (group 2)	-0.695559	0.120938	8.852e-09	-0.369339	0.339496	0.276638	0.740244	0.33153	284896	UK Biobank
Illnesses of siblings: Severe depression	0.704833	0.103385	9.25999e-12	0.0960427	0.508044	0.850058	0.999831	0.000211781	279858	UK Biobank
Illnesses of siblings: High blood pressure	0.215968	0.065027	0.00089631	-0.340982	0.411197	0.406967	0.844403	0.196265	281619	UK Biobank
Smoking status: Never	-0.266104	0.0616605	1.59146e-05	-0.495296	0.31506	0.115935	0.486972	0.695133	359706	UK Biobank
Smoking status: Previous	0.226494	0.056135	5.46469e-05	-0.280779	0.430508	0.51427	0.940821	0.0742377	359706	UK Biobank
Smoking status: Current	0.242865	0.081389	0.00284508	-0.487985	0.325921	0.134328	0.518548	0.645585	359706	UK Biobank
Alcohol drinker status: Never	0.223389	0.089156	0.0122246	0.370863	0.35593	0.297433	0.76936	0.293212	360726	UK Biobank
Alcohol drinker status: Previous	0.354356	0.0782944	6.01272e-06	-0.6112	0.250578	0.0147212	0.117485	1.56542	360726	UK Biobank
Alcohol drinker status: Current	-0.354325	0.0738725	1.61511e-06	-0.362888	0.302601	0.230438	0.704015	0.379907	360726	UK Biobank
Home area population density - urban or rural: England/Wales - Hamlet and Isolated Dwelling - less sparse	-0.335282	0.134093	0.0124066	0.204985	0.478392	0.668296	0.999831	0.000211781	357712	UK Biobank
Bipolar and major depression status: No Bipolar or Depression	-0.863664	0.0960879	2.51156e-19	0.113222	0.562965	0.840607	0.999831	0.000211781	86895	UK Biobank
Bipolar and major depression status: Probable Recurrent major depression (severe)	0.936081	0.164955	1.3887e-08	-0.0118958	0.579577	0.983625	0.999831	0.000211781	86895	UK Biobank
Bipolar and major depression status: Probable Recurrent major depression (moderate)	0.755039	0.135294	2.39527e-08	-0.747282	0.21862	0.000630412	0.00905926	2.60981	86895	UK Biobank
Ever smoked	0.251286	0.056206	7.79229e-06	-0.522465	0.311362	0.0933474	0.476563	0.711841	359751	UK Biobank
Loneliness, isolation	0.71943	0.0682126	5.25073e-26	-0.274918	0.484001	0.570027	0.98298	0.0213325	355583	UK Biobank
Guilty feelings	0.499415	0.0667518	7.33829e-14	-0.343102	0.296815	0.247704	0.731284	0.343418	351907	UK Biobank
Risk taking	0.18994	0.0754254	0.0117938	-0.334909	0.371788	0.36769	0.822168	0.224758	348549	UK Biobank
Ever addicted to any substance or behaviour	0.698202	0.179393	9.94066e-05	0.111624	0.549815	0.839118	0.999831	0.000211781	116746	UK Biobank
Ever had known person concerned about, or recommend reduction of, alcohol consumption: No	-0.365684	0.118816	0.00208582	0.0826816	0.541159	0.878567	0.999831	0.000211781	117880	UK Biobank
Ever had known person concerned about, or recommend reduction of, alcohol consumption: Yes, but not in the last year	0.569626	0.142434	6.35489e-05	0.101305	0.60048	0.866027	0.999831	0.000211781	117880	UK Biobank
Tense, sore, or aching muscles during worst period of anxiety	0.547215	0.146038	0.00017891	0.43225	0.615299	0.482365	0.901924	0.123231	33301	UK Biobank
Ever felt worried, tense, or anxious for most of a month or longer	0.616597	0.0819687	5.3799e-14	0.465872	0.332945	0.161739	0.592025	0.535904	110315	UK Biobank
More irritable than usual during worst period of anxiety	0.626992	0.196137	0.0013901	0.00241763	0.57721	0.996658	0.999831	0.000211781	33425	UK Biobank
Ever worried more than most people would in similar situation	0.680915	0.0963581	1.58889e-12	-0.396713	0.42011	0.345013	0.81625	0.232371	98990	UK Biobank
Professional informed about anxiety	0.646165	0.141412	4.89139e-06	0.111313	0.554191	0.840811	0.999831	0.000211781	36366	UK Biobank
Easily tired during worst period of anxiety	0.640869	0.194461	0.000982064	0.416674	0.229667	0.0696386	0.405135	0.832485	34121	UK Biobank
Difficulty concentrating during worst depression	0.745	0.14217	1.60402e-07	-0.752322	0.210319	0.000347483	0.00586188	2.75541	58750	UK Biobank
Thoughts of death during worst depression	0.507814	0.164739	0.00205245	-0.65726	0.237956	0.00574289	0.0571344	1.90228	62648	UK Biobank
Ever had prolonged loss of interest in normal activities	0.777869	0.0780246	2.07212e-23	0.0364644	0.528995	0.945044	0.999831	0.000211781	117727	UK Biobank
Ever had prolonged feelings of sadness or depression	0.809946	0.086508	7.7745e-21	0.287871	0.491353	0.557961	0.966499	0.0420002	117763	UK Biobank
Professional informed about depression	0.689392	0.118519	6.00152e-09	0.0859258	0.560674	0.878198	0.999831	0.000211781	66302	UK Biobank
Feelings of tiredness during worst episode of depression	0.565206	0.158906	0.000375302	-0.00701353	0.573988	0.990251	0.999831	0.000211781	59774	UK Biobank
Feelings of worthlessness during worst period of depression	0.524551	0.136372	0.000119827	-0.348501	0.401741	0.385681	0.822168	0.224758	62128	UK Biobank
Ever heard an un-real voice	0.469471	0.17982	0.00903344	-0.488632	0.325851	0.133729	0.518548	0.645585	117503	UK Biobank
Ever self-harmed	0.799943	0.152097	1.44495e-07	0.0609887	0.568007	0.914493	0.999831	0.000211781	117733	UK Biobank
Severity of problems due to mania or irritability	0.304884	0.118289	0.00995314	0.00862408	0.450493	0.984727	0.999831	0.000211781	26655	UK Biobank
Ever sought or received professional help for mental distress	0.885601	0.077603	3.64514e-30	-0.116477	0.56251	0.835957	0.999831	0.000211781	117677	UK Biobank
Ever suffered mental distress preventing usual activities	0.943099	0.085346	2.18489e-28	0.326899	0.518971	0.52876	0.945433	0.0684431	116527	UK Biobank
Ever had period of mania / excitability	0.602245	0.12041	5.68527e-07	-0.788288	0.175028	6.67566e-06	0.000185011	3.73865	115338	UK Biobank
Ever had period extreme irritability	0.683375	0.0821104	8.60317e-17	-0.112973	0.423805	0.789801	0.999831	0.000211781	114422	UK Biobank
Been in serious accident believed to be life-threatening	0.680049	0.167566	4.94126e-05	0.776531	0.159249	1.0814e-06	3.86408e-05	4.11546	117922	UK Biobank
Diagnosed with life-threatening illness	0.344511	0.125491	0.00604555	-0.150228	0.48158	0.75508	0.999831	0.000211781	117617	UK Biobank
Victim of physically violent crime	0.439266	0.102293	1.75314e-05	0.0441759	0.563828	0.93755	0.999831	0.000211781	117846	UK Biobank
Victim of sexual assault	0.569602	0.0987533	8.02482e-09	0.573844	0.296144	0.0526577	0.324304	0.985651	116671	UK Biobank
Did your sleep change?	0.685568	0.270762	0.0113415	-0.745579	0.208273	0.00034383	0.00586188	2.75541	57086	UK Biobank
Sleeping too much	0.649694	0.158194	4.0094e-05	-0.878727	0.109229	8.63811e-16	3.35159e-13	7.27946	45540	UK Biobank
Weight change during worst episode of depression: Gained weight	0.444578	0.140031	0.00149909	0.176228	0.74547	0.813123	0.999831	0.000211781	56571	UK Biobank
Difficulty stopping worrying during worst period of anxiety	0.718709	0.238902	0.00262639	0.0244277	0.575396	0.966137	0.999831	0.000211781	35523	UK Biobank
Number of things worried about during worst period of anxiety	0.645966	0.176215	0.000246574	-0.169338	0.525562	0.747298	0.999831	0.000211781	35558	UK Biobank
Mental health problems ever diagnosed by a professional: Social anxiety or social phobia	0.813665	0.216225	0.000167857	-0.500586	0.392145	0.201767	0.668443	0.428285	117716	UK Biobank
Mental health problems ever diagnosed by a professional: Depression	0.989278	0.0902155	5.58512e-28	0.00128754	0.580191	0.998229	0.999831	0.000211781	117782	UK Biobank
Mental health problems ever diagnosed by a professional: Anxiety, nerves or generalized anxiety disorder	0.750846	0.0979939	1.82818e-14	0.273444	0.499243	0.583887	0.99132	0.0108788	117751	UK Biobank
Mental health problems ever diagnosed by a professional: Panic attacks	0.694365	0.136638	3.73927e-07	-0.293919	0.307146	0.3386	0.811902	0.237973	117722	UK Biobank
Substances taken for depression: Unprescribed medication (more than once)	0.621647	0.238416	0.00912317	0.0112808	0.578897	0.984453	0.999831	0.000211781	117763	UK Biobank
Substances taken for depression: Medication prescribed to you (for at least two weeks)	0.883671	0.0840355	7.33399e-26	0.0951669	0.567263	0.866768	0.999831	0.000211781	117763	UK Biobank
Substances taken for depression: Drugs or alcohol (more than once)	0.612084	0.134	4.92855e-06	0.196779	0.523435	0.706964	0.999831	0.000211781	117763	UK Biobank
Activities undertaken to treat depression: Talking therapies, such as psychotherapy, counselling, group therapy or CBT	0.80204	0.0844255	2.09946e-21	0.00718506	0.575633	0.990041	0.999831	0.000211781	117763	UK Biobank
Activities undertaken to treat depression: Other therapeutic activities such as mindfulness, yoga or art classes	0.50463	0.0975597	2.30944e-07	0.307858	0.517539	0.551943	0.966499	0.0420002	117763	UK Biobank
Manifestations of mania or irritability: I was more talkative than usual	0.656124	0.108233	1.343e-09	0.0138223	0.56994	0.980651	0.999831	0.000211781	114422	UK Biobank
Manifestations of mania or irritability: I was more restless than usual	0.68255	0.108518	3.17957e-10	0.184411	0.530862	0.728306	0.999831	0.000211781	114422	UK Biobank
Manifestations of mania or irritability: My thoughts were racing	0.676419	0.129771	1.86419e-07	-0.401656	0.433463	0.354124	0.818053	0.23005	114422	UK Biobank
Manifestations of mania or irritability: I needed less sleep than usual	0.585549	0.16383	0.000351413	-0.309212	0.579087	0.593366	0.999831	0.000211781	114422	UK Biobank
Manifestations of mania or irritability: I was more creative or had more ideas than usual	0.5059	0.165538	0.00224236	-0.58855	0.169357	0.000510447	0.00761745	2.66857	114422	UK Biobank
Manifestations of mania or irritability: I was easily distracted	0.813305	0.167037	1.12152e-06	-0.111085	0.560432	0.842878	0.999831	0.000211781	114422	UK Biobank
Manifestations of mania or irritability: I was more active than usual	0.51837	0.116386	8.43264e-06	-0.291526	0.297522	0.327162	0.811412	0.238605	114422	UK Biobank
Substances taken for anxiety: Medication prescribed to you (for at least two weeks)	0.867757	0.0998183	3.51854e-18	-0.104742	0.565286	0.853001	0.999831	0.000211781	98990	UK Biobank
Substances taken for anxiety: Drugs or alcohol (more than once)	0.743361	0.191073	0.000100054	0.0665053	0.570392	0.90718	0.999831	0.000211781	98990	UK Biobank
Activities undertaken to treat anxiety: Talking therapies, such as psychotherapy, counselling, group therapy or CBT	0.765181	0.0933248	2.42157e-16	-0.128609	0.544532	0.81329	0.999831	0.000211781	98990	UK Biobank
Activities undertaken to treat anxiety: Other therapeutic activities such as mindfulness, yoga or art classes	0.358964	0.112569	0.00142853	0.351882	0.40233	0.381786	0.822168	0.224758	98990	UK Biobank
Methods of self-harm used: Ingesting a medication in excess of the normal dose	0.837545	0.191387	1.20781e-05	-0.0824739	0.566933	0.884337	0.999831	0.000211781	117733	UK Biobank
Actions taken following self-harm: See anyone from psychiatric or mental health services, including liaison services	0.502272	0.155249	0.0012153	0.371847	0.413379	0.36837	0.822168	0.224758	117733	UK Biobank
Seen doctor (GP) for nerves, anxiety, tension or depression	0.857173	0.061441	3.09558e-44	-0.260052	0.520413	0.617284	0.999831	0.000211781	358693	UK Biobank
Seen a psychiatrist for nerves, anxiety, tension or depression	0.857184	0.0724505	2.68901e-32	-0.23236	0.532842	0.662781	0.999831	0.000211781	359535	UK Biobank
Ever had same-sex intercourse	0.375144	0.109931	0.000643617	-0.50805	0.348778	0.145211	0.541749	0.61017	326849	UK Biobank
Long-standing illness, disability or infirmity	0.594428	0.0580323	1.27163e-24	-0.269702	0.384917	0.483506	0.901924	0.123231	352798	UK Biobank
Doctor diagnosed hayfever or allergic rhinitis	0.247339	0.081618	0.00244191	0.00670475	0.580402	0.990783	0.999831	0.000211781	91787	UK Biobank
Doctor diagnosed asthma	0.367136	0.0964989	0.000142056	0.0350468	0.571271	0.951081	0.999831	0.000211781	91787	UK Biobank
Other eye problems	0.356749	0.109461	0.00111752	0.41177	0.35415	0.244952	0.731284	0.343418	360134	UK Biobank
Hearing difficulty/problems: No	-0.320214	0.058401	4.18111e-08	-0.260686	0.349944	0.456311	0.876478	0.155435	346635	UK Biobank
Hearing difficulty/problems: Yes	0.321079	0.058592	4.25515e-08	-0.241173	0.299883	0.421267	0.855768	0.181764	346635	UK Biobank
Cough on most days	0.523301	0.100888	2.13748e-07	0.126274	0.505964	0.802919	0.999831	0.000211781	91787	UK Biobank
Bring up phlegm/sputum/mucus on most days	0.51886	0.13183	8.29095e-05	0.0672761	0.560905	0.904529	0.999831	0.000211781	91787	UK Biobank
Tobacco smoking: Ex-smoker	0.297662	0.0956701	0.0018624	-0.119152	0.299727	0.690973	0.999831	0.000211781	91353	UK Biobank
Tobacco smoking: Never smoked	-0.278676	0.0966435	0.00393225	-0.351233	0.314452	0.264007	0.731284	0.343418	91353	UK Biobank
Hearing difficulty/problems with background noise	0.431756	0.0599544	5.95957e-13	-0.442993	0.343986	0.197807	0.668443	0.428285	353983	UK Biobank
Workplace very noisy: Often	0.536162	0.101065	1.12598e-07	-0.449702	0.377922	0.234073	0.709533	0.372483	90653	UK Biobank
Workplace very cold: Rarely/never	-0.311858	0.118491	0.00849041	-0.327518	0.289892	0.258564	0.731284	0.343418	90696	UK Biobank
Workplace very cold: Sometimes	0.342962	0.128949	0.00782179	0.0179644	0.564917	0.974631	0.999831	0.000211781	90500	UK Biobank
Workplace very cold: Often	0.513674	0.146657	0.000460808	-0.753063	0.184446	4.44896e-05	0.000908525	3.31742	90188	UK Biobank
Workplace very hot: Often	0.500519	0.145544	0.000583992	-0.54719	0.149107	0.00024277	0.00448546	2.84184	90165	UK Biobank
Workplace very dusty: Sometimes	0.658417	0.202323	0.00113678	-0.67423	0.251623	0.00737279	0.0715161	1.80219	89965	UK Biobank
Workplace very dusty: Often	0.536479	0.118783	6.28798e-06	-0.0154524	0.572213	0.978456	0.999831	0.000211781	89631	UK Biobank
Workplace full of chemical or other fumes: Sometimes	0.45843	0.139524	0.00101738	-0.38654	0.404784	0.339614	0.811902	0.237973	89060	UK Biobank
Workplace full of chemical or other fumes: Often	0.733818	0.185398	7.55596e-05	-0.860869	0.128794	2.32373e-11	3.00535e-09	5.93131	88735	UK Biobank
Workplace had a lot of cigarette smoke from other people smoking: Often	0.653078	0.163731	6.64268e-05	-0.735466	0.209848	0.00045703	0.0070931	2.69244	89803	UK Biobank
Worked with materials containing asbestos: Sometimes	0.451123	0.15097	0.00280652	0.110043	0.572788	0.847649	0.999831	0.000211781	77361	UK Biobank
Worked with paints, thinners or glues: Sometimes	0.540417	0.123333	1.17727e-05	-0.802107	0.157127	3.31105e-07	1.42743e-05	4.3396	89003	UK Biobank
Workplace had a lot of diesel exhaust: Sometimes	0.474761	0.151328	0.00170515	-0.0299125	0.576602	0.958627	0.999831	0.000211781	89310	UK Biobank
Breathing problems during period of job: Yes	0.688071	0.137779	5.91347e-07	-0.00414783	0.566911	0.994162	0.999831	0.000211781	91149	UK Biobank
Breathing problems improved/stopped away from workplace or on holiday: No	0.643884	0.164582	9.14478e-05	-0.000122846	0.580059	0.999831	0.999831	0.000211781	91149	UK Biobank
Breathing problems improved/stopped away from workplace or on holiday: Yes	0.694707	0.170716	4.71414e-05	0.852544	0.117241	3.54928e-13	6.8856e-11	6.52313	91149	UK Biobank
Breathing problems responsible for leaving job: No	0.540745	0.140767	0.000122327	0.147495	0.513865	0.774089	0.999831	0.000211781	91149	UK Biobank
Job involved shift work: Yes	0.407165	0.120395	0.000719849	0.163323	0.502172	0.745005	0.999831	0.000211781	91149	UK Biobank
Gap coding: Unable to work due to sickness or disability	0.503473	0.203323	0.0132779	0.171916	0.821228	0.834182	0.999831	0.000211781	67892	UK Biobank
Wheeze or whistling in the chest in last year	0.385854	0.0712182	6.0296e-08	-0.437274	0.343868	0.203504	0.668443	0.428285	354523	UK Biobank
Chest pain or discomfort	0.594816	0.0670012	6.82634e-19	-0.148342	0.444656	0.738672	0.999831	0.000211781	357507	UK Biobank
Ever had bowel cancer screening	0.254992	0.0862205	0.00310205	0.518786	0.291557	0.0751797	0.405135	0.832485	355353	UK Biobank
Had major operations	0.300641	0.0981719	0.00219575	0.408478	0.296426	0.1682	0.609923	0.510184	165737	UK Biobank
Diabetes diagnosed by doctor	0.237952	0.0660684	0.000316272	-0.689957	0.204841	0.000756443	0.0104821	2.55951	360192	UK Biobank
Fractured/broken bones in last 5 years	0.209928	0.0818222	0.0102979	-0.0403374	0.371129	0.91345	0.999831	0.000211781	359241	UK Biobank
Other serious medical condition/disability diagnosed by doctor	0.434953	0.0724264	1.90793e-09	-0.000674107	0.145142	0.996294	0.999831	0.000211781	354588	UK Biobank
Taking other prescription medications	0.504722	0.0630639	1.21081e-15	-0.491996	0.322453	0.127061	0.518548	0.645585	360027	UK Biobank
Ever used hormone-replacement therapy (HRT)	0.346926	0.0758983	4.85559e-06	-0.0647996	0.506768	0.898253	0.999831	0.000211781	193606	UK Biobank
Bilateral oophorectomy (both ovaries removed)	0.405974	0.0921027	1.04406e-05	-0.0466397	0.48689	0.923687	0.999831	0.000211781	191515	UK Biobank
Had other major operations	0.405707	0.102478	7.52738e-05	-0.93711	0.151448	6.10552e-10	3.94824e-08	5.49315	192470	UK Biobank
Neck/shoulder pain for 3+ months	0.526119	0.199967	0.00851267	-0.108493	0.505298	0.829993	0.999831	0.000211781	81276	UK Biobank
Back pain for 3+ months	0.306258	0.1123	0.00638877	0.52556	0.115463	5.31937e-06	0.000158763	3.77695	90555	UK Biobank
Knee pain for 3+ months	0.284669	0.108755	0.00885693	0.32734	0.514894	0.524944	0.942955	0.0715564	76000	UK Biobank
Detention categories: Informal, not formally detained	0.320969	0.127088	0.0115512	-0.490667	0.327173	0.133688	0.518548	0.645585	361194	UK Biobank
Hospital episode type: General episode	0.361113	0.0902263	6.2728e-05	-0.332007	0.403231	0.410299	0.845252	0.195181	361194	UK Biobank
Destinations on discharge from hospital (recoded): Usual Place of residence	0.421507	0.0753951	2.26243e-08	-0.0334376	0.353831	0.924711	0.999831	0.000211781	361058	UK Biobank
Ever depressed for a whole week	0.85523	0.0915116	9.13848e-21	-0.0905533	0.56486	0.872636	0.999831	0.000211781	117705	UK Biobank
Ever unenthusiastic/disinterested for a whole week	0.847335	0.0969828	2.39476e-18	-0.345693	0.484926	0.475922	0.898389	0.127697	115145	UK Biobank
Ever manic/hyper for 2 days	0.71549	0.140427	3.4854e-07	-0.000707764	0.580231	0.999027	0.999831	0.000211781	117155	UK Biobank
Ever highly irritable/argumentative for 2 days	0.754767	0.0999827	4.38685e-14	-0.0337697	0.571413	0.952874	0.999831	0.000211781	117359	UK Biobank
Shortness of breath walking on level ground	0.484956	0.095283	3.58753e-07	0.407094	0.254718	0.109995	0.486972	0.695133	118006	UK Biobank
Leg pain on walking	0.419616	0.0955592	1.12748e-05	0.20356	0.261693	0.436652	0.870587	0.162913	118905	UK Biobank
Tinnitus: No, never	-0.373212	0.0780414	1.73361e-06	-0.492585	0.376843	0.191167	0.662256	0.4368	117882	UK Biobank
Tinnitus: Yes, now most or all of the time	0.341392	0.100391	0.000672308	-0.4925	0.306392	0.107963	0.486972	0.695133	117882	UK Biobank
FI3 : word interpolation	-0.251632	0.0872674	0.00393337	0.0555576	0.190761	0.770866	0.999831	0.000211781	116815	UK Biobank
FI4 : positional arithmetic	-0.186006	0.0730702	0.0109098	0.0870978	0.197436	0.659109	0.999831	0.000211781	115690	UK Biobank
FI10 : arithmetic sequence recognition	-0.326793	0.111531	0.00338902	-0.046325	0.295401	0.875386	0.999831	0.000211781	20880	UK Biobank
ECG, phase duration	-0.53959	0.201353	0.00736621	-0.0430882	0.556052	0.938234	0.999831	0.000211781	53998	UK Biobank
Qualifications: College or University degree	-0.164184	0.0576531	0.00440225	-0.193472	0.22457	0.388951	0.822168	0.224758	357549	UK Biobank
Qualifications: None of the above	0.238343	0.0612145	9.87806e-05	0.00136509	0.155774	0.993008	0.999831	0.000211781	357549	UK Biobank
Qualifications: Other professional qualifications eg: nursing, teaching	-0.172731	0.069518	0.0129665	0.447676	0.230996	0.05262	0.324304	0.985651	357549	UK Biobank
Gas or solid-fuel cooking/heating: An open solid fuel fire that you use regularly in winter time	-0.251105	0.0794179	0.00156787	-0.498222	0.298794	0.095427	0.480853	0.704932	360066	UK Biobank
How are people in household related to participant: Husband, wife or partner	-0.289395	0.0848538	0.000648413	-0.302559	0.350104	0.387479	0.822168	0.224758	358963	UK Biobank
How are people in household related to participant: Son and/or daughter (include step-children)	-0.337002	0.109171	0.00202246	-0.313515	0.173742	0.0711544	0.405135	0.832485	358963	UK Biobank
Current employment status: In paid employment or self-employed	-0.341604	0.108813	0.00169312	-0.24418	0.290733	0.400977	0.836447	0.20644	359931	UK Biobank
Current employment status: Unable to work because of sickness or disability	0.43364	0.0924042	2.69414e-06	-0.280313	0.322334	0.3845	0.822168	0.224758	359931	UK Biobank
Current employment status: Unemployed	0.421505	0.147286	0.0042123	0.150068	0.536922	0.779864	0.999831	0.000211781	359931	UK Biobank
Transport type for commuting to job workplace: Cycle	-0.233262	0.0743041	0.00169359	0.495922	0.31202	0.111972	0.486972	0.695133	190832	UK Biobank
Illness, injury, bereavement, stress in last 2 years: Serious illness, injury or assault to yourself	0.484894	0.0864366	2.02535e-08	0.512209	0.31537	0.104343	0.486972	0.695133	358836	UK Biobank
Illness, injury, bereavement, stress in last 2 years: None of the above	-0.510818	0.0832399	8.42569e-10	0.272111	0.408074	0.504889	0.935341	0.0811272	358836	UK Biobank
Illness, injury, bereavement, stress in last 2 years: Serious illness, injury or assault of a close relative	0.348063	0.118857	0.003407	-0.495668	0.302544	0.101352	0.486972	0.695133	358836	UK Biobank
Illness, injury, bereavement, stress in last 2 years: Marital separation/divorce	0.590279	0.190034	0.00189521	0.0874735	0.558172	0.87547	0.999831	0.000211781	358836	UK Biobank
Illness, injury, bereavement, stress in last 2 years: Financial difficulties	0.544824	0.0772931	1.8045e-12	-0.451292	0.354604	0.203137	0.668443	0.428285	358836	UK Biobank
Attendance/disability/mobility allowance: None of the above	-0.313341	0.0964951	0.00116538	-0.476186	0.299642	0.112019	0.486972	0.695133	358597	UK Biobank
Attendance/disability/mobility allowance: Disability living allowance	0.386381	0.084486	4.80079e-06	-0.48471	0.293745	0.0989211	0.486972	0.695133	358597	UK Biobank
Attendance/disability/mobility allowance: Blue badge	0.268951	0.0951296	0.00469557	-0.483074	0.248696	0.0520854	0.324304	0.985651	358597	UK Biobank
Mouth/teeth dental problems: Mouth ulcers	0.278297	0.0759705	0.000249057	-0.494572	0.101479	1.09549e-06	3.86408e-05	4.11546	359841	UK Biobank
Mouth/teeth dental problems: None of the above	-0.377661	0.0858621	1.09023e-05	-0.482354	0.544591	0.375769	0.822168	0.224758	359841	UK Biobank
Mouth/teeth dental problems: Painful gums	0.54141	0.156333	0.00053381	-0.389153	0.385292	0.312485	0.793656	0.261566	359841	UK Biobank
Mouth/teeth dental problems: Loose teeth	0.478745	0.10715	7.89513e-06	-0.0300831	0.574313	0.958225	0.999831	0.000211781	359841	UK Biobank
Mouth/teeth dental problems: Toothache	0.524082	0.135538	0.000110323	-0.297048	0.507041	0.557979	0.966499	0.0420002	359841	UK Biobank
Vascular/heart problems diagnosed by doctor: Heart attack	0.316967	0.0742474	1.96299e-05	-0.513546	0.294054	0.0807361	0.429118	0.790702	360420	UK Biobank
Vascular/heart problems diagnosed by doctor: Angina	0.213529	0.0783469	0.00642186	0.131534	0.499642	0.792353	0.999831	0.000211781	360420	UK Biobank
Vascular/heart problems diagnosed by doctor: Stroke	0.635711	0.165893	0.000127078	-0.591113	0.289859	0.0414187	0.281938	1.07598	360420	UK Biobank
Fractured bone site(s): Other bones	0.324519	0.110057	0.00319178	-0.484715	0.322751	0.133142	0.518548	0.645585	359241	UK Biobank
Blood clot, DVT, bronchitis, emphysema, asthma, rhinitis, eczema, allergy diagnosed by doctor: None of the above	-0.206142	0.055981	0.000231091	0.0812258	0.374217	0.828165	0.999831	0.000211781	360527	UK Biobank
Blood clot, DVT, bronchitis, emphysema, asthma, rhinitis, eczema, allergy diagnosed by doctor: Emphysema/chronic bronchitis	0.360999	0.135664	0.00779123	-0.0770768	0.461017	0.867222	0.999831	0.000211781	360527	UK Biobank
Blood clot, DVT, bronchitis, emphysema, asthma, rhinitis, eczema, allergy diagnosed by doctor: Asthma	0.233706	0.0673119	0.000516629	0.249884	0.447579	0.576638	0.985619	0.0180243	360527	UK Biobank
Medication for pain relief, constipation, heartburn: Aspirin	0.261616	0.0886866	0.00317887	0.0854062	0.210593	0.685072	0.999831	0.000211781	357084	UK Biobank
Medication for pain relief, constipation, heartburn: None of the above	-0.451751	0.0614229	1.91267e-13	-0.125733	0.349836	0.719292	0.999831	0.000211781	357084	UK Biobank
Medication for pain relief, constipation, heartburn: Ibuprofen (e.g. Nurofen)	0.460465	0.0838979	4.05592e-08	0.122261	0.206622	0.554043	0.966499	0.0420002	357084	UK Biobank
Medication for pain relief, constipation, heartburn: Paracetamol	0.366838	0.0647283	1.45023e-08	-0.491365	0.326337	0.132145	0.518548	0.645585	357084	UK Biobank
Medication for pain relief, constipation, heartburn: Ranitidine (e.g. Zantac)	0.444964	0.121504	0.000250139	0.0968973	0.522274	0.852814	0.999831	0.000211781	357084	UK Biobank
Medication for pain relief, constipation, heartburn: Omeprazole (e.g. Zanprol)	0.55162	0.0792604	3.41254e-12	-0.363488	0.413393	0.379249	0.822168	0.224758	357084	UK Biobank
Medication for pain relief, constipation, heartburn: Laxatives (e.g. Dulcolax, Senokot)	0.289768	0.102288	0.00461329	-0.544472	0.280517	0.052263	0.324304	0.985651	357084	UK Biobank
Vitamin and mineral supplements: Vitamin B	0.35798	0.131723	0.00657436	-0.759242	0.175747	1.55973e-05	0.000403449	3.53782	359245	UK Biobank
Vitamin and mineral supplements: Multivitamins +/- minerals	0.204434	0.0781983	0.00894105	0.0553073	0.272017	0.838883	0.999831	0.000211781	359245	UK Biobank
Why stopped smoking: Illness or ill health	0.485013	0.193584	0.0122298	-0.0159496	0.579467	0.978041	0.999831	0.000211781	88516	UK Biobank
Why stopped smoking: Doctor's advice	0.410851	0.152982	0.00723957	-0.0257536	0.575857	0.964329	0.999831	0.000211781	88516	UK Biobank
Pain type(s) experienced in last month: Headache	0.39121	0.0706827	3.11702e-08	-0.0208524	0.522251	0.968151	0.999831	0.000211781	360391	UK Biobank
Pain type(s) experienced in last month: None of the above	-0.501382	0.0610877	2.25702e-16	-0.330155	0.28998	0.254893	0.731284	0.343418	360391	UK Biobank
Pain type(s) experienced in last month: Facial pain	0.444166	0.118796	0.000184827	0.354717	0.383132	0.354532	0.818053	0.23005	360391	UK Biobank
Pain type(s) experienced in last month: Back pain	0.485345	0.0652839	1.05065e-13	-0.352042	0.404033	0.383579	0.822168	0.224758	360391	UK Biobank
Pain type(s) experienced in last month: Stomach or abdominal pain	0.54865	0.0785337	2.82493e-12	-0.203842	0.457816	0.65614	0.999831	0.000211781	360391	UK Biobank
Pain type(s) experienced in last month: Hip pain	0.444271	0.0818661	5.73734e-08	-0.151462	0.502811	0.763239	0.999831	0.000211781	360391	UK Biobank
Pain type(s) experienced in last month: Knee pain	0.255744	0.0704035	0.000280637	0.0774627	0.203736	0.703788	0.999831	0.000211781	360391	UK Biobank
Pain type(s) experienced in last month: Pain all over the body	0.403064	0.121594	0.000916957	0.228345	0.483181	0.636508	0.999831	0.000211781	360391	UK Biobank
Leisure/social activities: Sports club or gym	-0.383936	0.0569124	1.51884e-11	0.227681	0.279586	0.415443	0.848379	0.191187	360063	UK Biobank
Leisure/social activities: None of the above	0.262633	0.0940055	0.00520911	-0.251756	0.236012	0.286102	0.755154	0.31185	360063	UK Biobank
Types of transport used (excluding work): Cycle	-0.261791	0.0870393	0.00263206	0.0106235	0.575065	0.985261	0.999831	0.000211781	359324	UK Biobank
Types of physical activity in last 4 weeks: Walking for pleasure (not as a means of transport)	-0.289803	0.0684246	2.2818e-05	-0.054664	0.291633	0.851315	0.999831	0.000211781	359263	UK Biobank
Types of physical activity in last 4 weeks: None of the above	0.417407	0.0801868	1.93541e-07	-0.171852	0.415953	0.679495	0.999831	0.000211781	359263	UK Biobank
Types of physical activity in last 4 weeks: Strenuous sports	-0.341194	0.0692482	8.34544e-07	-0.328204	0.355284	0.355602	0.818053	0.23005	359263	UK Biobank
Types of physical activity in last 4 weeks: Heavy DIY (eg: weeding, lawn mowing, carpentry, digging)	-0.211486	0.0675309	0.00173804	0.113938	0.130011	0.380828	0.822168	0.224758	359263	UK Biobank
Medication for cholesterol, blood pressure or diabetes: Cholesterol lowering medication	0.224885	0.0623636	0.000310911	-0.575862	0.260558	0.0270972	0.202187	1.27535	165340	UK Biobank
Mineral and other dietary supplements: Zinc	0.328945	0.107417	0.0021963	-0.0843172	0.550402	0.878247	0.999831	0.000211781	360016	UK Biobank
Type of accommodation lived in: A house or bungalow	-0.440298	0.0986555	8.08234e-06	-0.2181	0.669882	0.744742	0.999831	0.000211781	360088	UK Biobank
Type of accommodation lived in: A flat, maisonette or apartment	0.434939	0.102447	2.18092e-05	0.00934683	0.6893	0.989181	0.999831	0.000211781	360088	UK Biobank
Own or rent accommodation lived in: Own outright (by you or someone in your household)	-0.263731	0.0764054	0.000556988	-0.549232	0.260327	0.0348778	0.250603	1.14888	356340	UK Biobank
Own or rent accommodation lived in: Rent - from local authority, local council, housing association	0.456218	0.0617179	1.44643e-13	-0.485747	0.326083	0.136319	0.518548	0.645585	356340	UK Biobank
Cystatin C	0.143316	0.0487737	0.00329939	0.310032	0.409431	0.448915	0.875869	0.156208	400940	UK Biobank (EUR)
HDL cholesterol	-0.122577	0.0416087	0.00321975	-0.672491	0.179066	0.000172964	0.00335551	2.93314	367021	UK Biobank (EUR)
IGF-1	-0.121437	0.0421687	0.00397941	0.00017588	0.580251	0.999758	0.999831	0.000211781	398797	UK Biobank (EUR)
Triglycerides	0.201754	0.0746384	0.00686982	-0.774482	0.143496	6.76794e-08	3.75137e-06	4.6247	400639	UK Biobank (EUR)
Vitamin D	-0.164556	0.0582868	0.00475444	-0.01654	0.588685	0.977585	0.999831	0.000211781	383324	UK Biobank (EUR)
Asthma-related pneumonia	0.418196	0.164729	0.0111269	-0.386578	0.349228	0.268315	0.731284	0.343418	361194	UK Biobank
Other malignant neoplasms of skin	-0.179512	0.072018	0.0126811	0.105436	0.520564	0.839493	0.999831	0.000211781	361194	UK Biobank
Other malignant neoplasms of skin	-0.179512	0.072018	0.0126811	0.105436	0.520564	0.839493	0.999831	0.000211781	361194	UK Biobank
Noninfectious colitis NAS	0.407126	0.164271	0.0131982	-0.132289	0.402655	0.742502	0.999831	0.000211781	361194	UK Biobank
COPD, early/later onset	0.418051	0.13428	0.00185021	0.148501	0.375815	0.692736	0.999831	0.000211781	361194	UK Biobank
COPD differential diagnosis	0.345534	0.108452	0.00144224	0.432699	0.274939	0.115534	0.486972	0.695133	361194	UK Biobank
Depression	0.428364	0.156096	0.00606514	0.218405	0.475894	0.64628	0.999831	0.000211781	361194	UK Biobank
Mood [affective] disorders	0.464537	0.144417	0.00129702	-0.374571	0.383049	0.32814	0.811412	0.238605	361194	UK Biobank
Diagnoses - main ICD10: G56 Mononeuropathies of upper limb	0.286287	0.0797059	0.000328411	0.000980839	0.577644	0.998645	0.999831	0.000211781	361194	UK Biobank
Carpal tunnel syndrome	0.2396	0.0795856	0.00260737	-0.0122519	0.578348	0.983099	0.999831	0.000211781	361194	UK Biobank
Episodal and paroxysmal disorders	0.481389	0.16567	0.00366408	-0.174036	0.510585	0.733212	0.999831	0.000211781	361194	UK Biobank
Nerve, nerve root and plexus disorders	0.329098	0.0796355	3.58755e-05	0.431152	0.348181	0.215605	0.685696	0.404703	361194	UK Biobank
Diagnoses - main ICD10: I20 Angina pectoris	0.39648	0.0985322	5.72509e-05	-0.112086	0.40828	0.783676	0.999831	0.000211781	361194	UK Biobank
Diagnoses - main ICD10: I25 Chronic ischaemic heart disease	0.249152	0.0678618	0.000241169	-0.0613559	0.575092	0.915036	0.999831	0.000211781	361194	UK Biobank
Coronary atherosclerosis	0.252854	0.0673372	0.000173309	-0.232705	0.458087	0.611458	0.999831	0.000211781	361194	UK Biobank
Ischaemic heart disease, wide definition	0.302974	0.0656054	3.87212e-06	-0.0731656	0.501249	0.883948	0.999831	0.000211781	361194	UK Biobank
Unstable angina pectoris	0.272991	0.109915	0.0130042	-0.373561	0.327151	0.253512	0.731284	0.343418	361194	UK Biobank
Any ICDMAIN event in hilmo or causes of death	0.374481	0.0722488	2.18091e-07	-0.0264285	0.295337	0.928696	0.999831	0.000211781	361194	UK Biobank
ILD differential diagnosis	0.345534	0.108452	0.00144224	0.432699	0.274939	0.115534	0.486972	0.695133	361194	UK Biobank
Diseases of the circulatory system	0.249589	0.0737701	0.000716113	0.0264132	0.250613	0.916063	0.999831	0.000211781	361194	UK Biobank
Diagnoses - main ICD10: J44 Other chronic obstructive pulmonary disease	0.415138	0.129121	0.00130395	-0.0195985	0.331401	0.952842	0.999831	0.000211781	361194	UK Biobank
Disorders of gallbladder, biliary tract and pancreas	0.253396	0.0761421	0.000874902	-0.446195	0.349571	0.201812	0.668443	0.428285	361194	UK Biobank
Hernia	0.363817	0.0761506	1.77401e-06	-0.0301243	0.482296	0.950196	0.999831	0.000211781	361194	UK Biobank
Other gastritis (incl. Duodenitis)	0.609687	0.131687	3.66002e-06	0.0120896	0.577011	0.983284	0.999831	0.000211781	361194	UK Biobank
Diagnoses - main ICD10: K29 Gastritis and duodenitis	0.588147	0.110586	1.0465e-07	0.00140475	0.579204	0.998065	0.999831	0.000211781	361194	UK Biobank
Diagnoses - main ICD10: K44 Diaphragmatic hernia	0.487875	0.136516	0.000351901	-0.681957	0.223688	0.00229835	0.0262282	2.22282	361194	UK Biobank
Diagnoses - main ICD10: K52 Other non-infective gastro-enteritis and colitis	0.42191	0.168033	0.012043	-0.0474728	0.295908	0.872542	0.999831	0.000211781	361194	UK Biobank
Diagnoses - main ICD10: K57 Diverticular disease of intestine	0.226503	0.0736395	0.00209912	-0.0138185	0.585755	0.981179	0.999831	0.000211781	361194	UK Biobank
Diagnoses - main ICD10: K80 Cholelithiasis	0.229607	0.0828601	0.00558805	-0.57086	0.275732	0.0384201	0.266196	1.11186	361194	UK Biobank
Any mental disorder	0.374805	0.124929	0.00269859	-0.212418	0.258779	0.411733	0.845252	0.195181	361194	UK Biobank
Mood disorders	0.464537	0.144417	0.00129702	-0.374571	0.383049	0.32814	0.811412	0.238605	361194	UK Biobank
Dorsalgia	0.363228	0.114959	0.00157974	-0.0600355	0.287396	0.834531	0.999831	0.000211781	361194	UK Biobank
Rotator cuff syndrome	0.318949	0.127887	0.0126313	0.414775	0.362854	0.253001	0.731284	0.343418	361194	UK Biobank
Diagnoses - main ICD10: M51 Other intervertebral disk disorders	0.450696	0.168897	0.00761971	0.0184533	0.674471	0.978173	0.999831	0.000211781	361194	UK Biobank
Diagnoses - main ICD10: M54 Dorsalgia	0.363228	0.114959	0.00157974	-0.0600355	0.287396	0.834531	0.999831	0.000211781	361194	UK Biobank
Diagnoses - main ICD10: N39 Other disorders of urinary system	0.321263	0.125221	0.0103008	0.00837606	0.325328	0.97946	0.999831	0.000211781	361194	UK Biobank
Pneumonias (Asthma/COPD co-morbidities)	0.418196	0.164729	0.0111269	-0.386578	0.349228	0.268315	0.731284	0.343418	361194	UK Biobank
Other pulmonary diagnosis	0.359264	0.108705	0.000950004	0.49212	0.27463	0.0731428	0.405135	0.832485	361194	UK Biobank
Diagnoses - main ICD10: R07 Pain in throat and chest	0.476143	0.0788762	1.57408e-09	0.301953	0.351595	0.390446	0.822168	0.224758	361194	UK Biobank
Diagnoses - main ICD10: R10 Abdominal and pelvic pain	0.499806	0.102205	1.00725e-06	0.631091	0.261387	0.0157614	0.122308	1.54516	361194	UK Biobank
Diagnoses - main ICD10: R19 Other symptoms and signs involving the digestive system and abdomen	1.06227	0.367152	0.00381263	0.60584	0.37209	0.10348	0.486972	0.695133	361194	UK Biobank
Diagnoses - main ICD10: T39 Poisoning by nonopioid analgesics, antipyretics and antirheumatics	0.652453	0.222598	0.00337784	0.0418807	0.569286	0.941355	0.999831	0.000211781	361194	UK Biobank
Mental and behavioural disorders	0.366008	0.125174	0.00345568	-0.283668	0.256696	0.269128	0.731284	0.343418	361194	UK Biobank
Diseases of the nervous system	0.485773	0.0985469	8.24995e-07	0.09652	0.541909	0.858636	0.999831	0.000211781	361194	UK Biobank
Diseases of the respiratory system	0.359264	0.108705	0.000950004	0.49212	0.27463	0.0731428	0.405135	0.832485	361194	UK Biobank
Diseases of the genitourinary system	0.244583	0.0844878	0.00379297	-0.422964	0.350801	0.227929	0.701877	0.382787	361194	UK Biobank
Injury, poisoning and certain other consequences of external causes	0.296869	0.0798215	0.00019989	-0.165283	0.219513	0.451479	0.875869	0.156208	361194	UK Biobank
Symptoms, signs and abnormal clinical and laboratory findings, not elsewhere classified	0.588249	0.0667986	1.29326e-18	-0.412678	0.329852	0.210898	0.67679	0.416848	361194	UK Biobank
Factors influencing health status and contact with health services	0.264776	0.1073	0.0136016	-0.507065	0.244689	0.0382394	0.266196	1.11186	361194	UK Biobank
Multisite chronic pain	0.485109	0.060313	8.75273e-16	-0.243724	0.3048	0.423932	0.856695	0.180582	380000	UK Biobank
Schizophrenia	0.257199	0.0583701	1.05128e-05	-0.490216	0.271137	0.0706064	0.405135	0.832485	150064	PGC
Cognitive Performance	-0.148014	0.0568877	0.00927209	0.258874	0.235375	0.271404	0.731284	0.343418	257841	SSGAC
COPD (EUR Biobanks)	0.431116	0.0823871	1.66948e-07	0.00261754	0.244237	0.991449	0.999831	0.000211781	995917	Global Biobank Meta-analysis Initiative Meta-analysis Initiative: powering genetic discovery across human diseases. 2029
COPD (All Biobanks)	0.419872	0.0808586	2.07296e-07	-0.061669	0.247166	0.802971	0.999831	0.000211781	1392366	Global Biobank Meta-analysis Initiative Meta-analysis Initiative: powering genetic discovery across human diseases. 2030
Bipolar Disorder	0.343044	0.0639525	8.13824e-08	-0.389923	0.290277	0.179181	0.63782	0.47075	51710	Psychiatric Genomics Consortium
Educational Attainment	-0.231118	0.0533431	1.47308e-05	-0.0913456	0.141206	0.5177	0.940821	0.0742377	766000	SSGAC
Bleeding gums	0.19327	0.0777635	0.0129423	0.498589	0.276165	0.0710121	0.405135	0.832485	461031	UK Biobank
Loose teeth	0.507104	0.0915524	3.0429e-08	0.0653361	0.55822	0.906825	0.999831	0.000211781	461031	UK Biobank
Painful gums	0.519367	0.113069	4.362e-06	-0.435676	0.348359	0.211061	0.67679	0.416848	461031	UK Biobank
Toothache	0.555146	0.128599	1.58245e-05	0.00310891	0.573623	0.995676	0.999831	0.000211781	461031	UK Biobank
Mouth ulcers	0.280569	0.0689686	4.74056e-05	-0.825107	0.125741	5.31081e-11	5.15149e-09	5.8422	461031	UK Biobank
Hematocrit	0.148498	0.0500832	0.00302651	-0.36456	0.224001	0.103633	0.486972	0.695133	173486	UK Biobank and INTERVAL
Heart Failure (HF) (EUR Biobanks)	0.2221	0.0803693	0.00571859	-0.429091	0.350377	0.220706	0.685951	0.404356	1020441	Global Biobank Meta-analysis Initiative Meta-analysis Initiative: powering genetic discovery across human diseases. 2035
Hemoglobin concentration	0.136354	0.0529895	0.0100754	0.0402239	0.568393	0.943583	0.999831	0.000211781	173487	UK Biobank and INTERVAL
Periodontitis + loose teeth	0.422427	0.104615	5.3928e-05	0.376093	0.395043	0.341082	0.811902	0.237973	506594	UK Biobank +GLIDE
Stroke (EUR Biobanks)	0.297427	0.113219	0.00861427	-0.838964	0.263718	0.0014662	0.0172389	2.38157	1039382	Global Biobank Meta-analysis Initiative Meta-analysis Initiative: powering genetic discovery across human diseases. 2039
Stroke (All Biobanks)	0.266846	0.0897313	0.00294103	-0.641091	0.227022	0.00474416	0.0497496	1.96211	1370901	Global Biobank Meta-analysis Initiative Meta-analysis Initiative: powering genetic discovery across human diseases. 2040

## Sheet: Gene-based analysis
GENE	CHR	START	STOP	NSNPS	NPARAM	N	ZSTAT	P
A1BG	19	58848172	58874865	40	15	64941	0.38035	0.35184
A2M	12	9210304	9278558	154	29	64941	0.22129	0.41243
NAT1	8	18017971	18091198	373	52	64941	0.61151	0.27043
NAT2	8	18238755	18268723	203	23	64941	-0.69098	0.75521
SERPINA3	14	95068639	95100395	113	37	64941	-0.91881	0.8209
AADAC	3	151521769	151556276	163	22	64941	1761	0.039116
AAMP	2	219118852	219144893	51	11	64941	-0.49937	0.69124
AANAT	17	74439433	74476199	114	29	64941	-0.047719	0.51903
AARS	16	70276198	70333452	41	23	64941	0.048796	0.48054
ABAT	16	8758444	8888432	706	90	64941	-0.17662	0.5701
ABCA1	9	107533283	107700527	680	94	64941	-0.28245	0.6112
ABCA2	9	139891686	139933374	99	29	64941	-0.032339	0.5129
ABCA3	16	2315879	2400747	124	39	64941	0.073526	0.47069
ABCB7	23	74263007	74386175	97	31	55863	-0.88158	0.811
ABCF1	6	30529170	30569309	81	19	64941	16853	0.045963
ABCA4	1	94448393	94596705	518	82	64941	-0.57114	0.71605
ABL1	9	133578266	133773062	527	65	64941	-0.05193	0.52071
AOC1	7	150514336	150568379	260	36	64941	0.56644	0.28555
ABL2	1	179058462	179208819	336	43	64941	11558	0.12388
ABO	9	136120563	136160630	330	35	64941	0.98014	0.16351
ABR	17	896758	1100616	775	118	64941	-13227	0.90703
ACAA1	3	38154201	38188733	47	19	64941	11225	0.13082
ACACA	17	35431927	35776902	490	65	64941	-0.37706	0.64693
ACACB	12	109544222	109716031	499	61	64941	11769	0.11962
ACADL	2	211042632	211100215	48	20	64941	25359	0.0056076
ACADM	1	76180043	76239355	201	29	64941	0.28553	0.38762
ACADS	12	121153544	121187811	105	27	64941	-0.62997	0.73564
ACADSB	10	124758429	124827806	238	38	64941	25675	0.0051215
ACADVL	17	7110444	7138586	40	15	64941	-0.38681	0.65055
ACAT1	11	107982258	108028895	87	24	64941	-0.73038	0.76742
ACAT2	6	160172989	160210087	114	23	64941	-0.24959	0.59855
ASIC2	17	31330105	32493825	3801	260	64941	0.64926	0.25809
ASIC1	12	50441420	50487405	72	22	64941	0.37507	0.35381
ACHE	7	100477615	100503754	70	20	64941	-0.60116	0.72613
ACLY	17	40013169	40096795	163	34	64941	-0.46097	0.67759
ACO1	9	32374601	32460834	223	48	64941	-12664	0.89732
ACR	22	51166652	51193727	43	23	64941	-0.76485	0.77782
ACO2	22	41855099	41934993	99	32	64941	-0.099419	0.5396
ACOX1	17	73927588	73985515	163	38	64941	0.85731	0.19564
ACP1	2	254869	288283	65	14	64941	0.42493	0.33544
ACP2	11	47250853	47280457	82	19	64941	-15121	0.93475
ACP5	19	11675475	11699801	72	23	64941	12104	0.11307
ACPP	3	132026211	132097146	274	33	64941	0.43111	0.33319
ACRV1	11	125532229	125560809	61	14	64941	-0.37524	0.64626
ACTA1	1	229556992	229579858	49	21	64941	0.61761	0.26842
ACTA2	10	90684831	90761147	214	42	64941	-0.24014	0.59489
ACTB	7	5556779	5580232	75	27	64941	0.21302	0.41566
ACTC1	15	35070297	35097927	118	43	64941	0.82084	0.20587
ACTG1	17	79466997	79489892	129	25	64941	0.22717	0.41015
ACTG2	2	74110093	74156780	177	39	64941	-0.69869	0.75763
ACTN4	19	39128256	39231336	309	37	64941	18017	0.035797
ACTL6A	3	179270708	179316193	62	13	64941	0.57796	0.28164
ACTN1	14	69330840	69456083	473	60	64941	0.34879	0.36362
ACTN2	1	236839754	236937931	344	50	64941	0.64905	0.25815
ACTN3	11	66304312	66340799	91	23	64941	-0.65854	0.74491
ACVR1	2	158582958	158742374	224	52	64941	0.71939	0.23595
ACVR1B	12	52335451	52400863	111	32	64941	11272	0.12983
ACVR2A	2	148592086	148698396	121	25	64941	-0.14835	0.55897
ACVR2B	3	38485790	38544633	119	25	64941	16106	0.053629
ACVRL1	12	52290657	52327145	117	31	64941	0.5545	0.28962
ACY1	3	52007300	52033218	30	21	64941	0.089838	0.46421
ACYP1	14	75509924	75546181	61	18	64941	11602	0.12299
ACYP2	2	54332410	54542437	631	66	64941	-0.62279	0.73329
ADA	20	43238160	43290376	138	40	64941	0.75067	0.22643
ADAM8	10	135065920	135100489	107	27	64941	-0.18396	0.57298
ADAM10	15	58877403	59052177	346	47	64941	-0.72298	0.76515
ADAR	1	154544533	154610456	131	27	64941	0.48977	0.31215
ADARB1	21	46484493	46656478	485	60	64941	11499	0.12509
ADARB2	10	1213253	1789670	2346	182	64941	-0.61914	0.73209
ADCY1	7	45604125	45772715	467	63	64941	0.39865	0.34508
ADCY2	5	7386343	7840194	1236	101	64941	12746	0.10122
ADCY3	2	25032038	25152602	415	42	64941	-0.079289	0.5316
ADCY5	3	122991143	123177924	385	63	64941	-0.31029	0.62183
ADCY6	12	49149975	49192820	82	26	64941	-14159	0.9216
ADCY7	16	50268830	50362046	202	53	64941	-0.35925	0.6403
ADCY8	8	131782546	132063012	987	83	64941	26519	0.0040021
ADCY9	16	4002650	4176186	666	85	64941	32066	0.00067156
ADCYAP1	18	894366	922173	117	44	64941	15512	0.060432
ADCYAP1R1	7	31082076	31161093	212	52	64941	-0.70174	0.75858
ADD1	4	2835454	2941803	182	45	64941	26032	0.0046182
ADD2	2	70878334	71005375	428	46	64941	-0.70375	0.7592
ADD3	10	111755627	111905323	213	42	64941	0.8897	0.18681
PLIN2	9	19105759	19137604	101	31	64941	0.56318	0.28666
ADH1A	4	100187523	100222185	96	20	64941	-0.067192	0.52679
ADH1B	4	100217527	100252572	99	24	64941	-0.0663	0.52643
ADH1C	4	100247649	100283917	204	22	64941	-0.34384	0.63452
ADH4	4	100034832	100075449	235	22	64941	-0.57513	0.7174
ADH5	4	99982129	100019931	154	23	64941	-0.79544	0.78682
ADH6	4	100113795	100150403	88	20	64941	0.0031603	0.49874
ADH7	4	100323418	100366667	147	35	64941	0.25412	0.3997
ADK	10	75900943	76479061	927	65	64941	-0.5829	0.72002
ADM	11	10316642	10338923	59	19	64941	0.56869	0.28478
ADORA1	1	203086833	203146533	182	37	64941	-10845	0.86093
ADORA2A	22	24809565	24848328	83	24	64941	-0.98503	0.83769
ADORA2B	17	15838231	15889210	93	29	64941	12971	0.097298
ADORA3	1	112015970	112116602	305	54	64941	-1.84	0.96712
ADPRH	3	119288280	119318792	98	23	64941	-0.40983	0.65903
PARP1	1	226538392	226605801	202	35	64941	12695	0.10212
PARP4	13	24985069	25096948	568	47	64941	19101	0.028062
ADRA1D	20	4191278	4239659	161	37	64941	0.044433	0.48228
ADRA1B	5	159333740	159410017	213	45	64941	10824	0.13954
ADRA1A	8	26595667	26737003	616	69	64941	-0.14787	0.55878
ADRA2A	10	112826790	112850665	45	20	64941	-0.26241	0.6035
ADRA2B	2	96768623	96792281	26	11	64941	-0.23333	0.59225
ADRA2C	4	3758296	3780253	83	24	64941	0.089756	0.46424
ADRB1	10	115793806	115816667	60	16	64941	0.60868	0.27137
ADRB2	5	148196156	148264628	232	51	64941	0.99603	0.15962
ADRB3	8	37810513	37834184	30	11	64941	12266	0.10998
ADRBK1	11	67023905	67064029	42	20	64941	-0.42093	0.6631
ADRBK2	22	25950861	26135259	445	51	64941	0.7098	0.23891
ADSL	22	40732504	40772577	63	24	64941	0.30202	0.38132
ADSS	1	244561794	244625436	158	29	64941	-10739	0.85857
AP2A1	19	50260180	50320369	156	36	64941	-0.17734	0.57038
AP2A2	11	915809	1022245	344	44	64941	-0.38717	0.65068
AP1B1	22	29713669	29794754	161	31	64941	-0.53721	0.70444
AP2B1	17	33903918	34063436	471	45	64941	-0.31082	0.62203
AP1G1	16	71752903	71853006	230	37	64941	15465	0.06099
AEBP1	7	44133960	44164164	77	26	64941	-12953	0.90238
AES	19	3042908	3072964	105	36	64941	-0.34951	0.63665
CRISP1	6	49791970	49854809	161	26	64941	0.434	0.33215
AFM	4	74337462	74379718	115	23	64941	0.89007	0.18671
AFP	4	74291933	74331492	84	26	64941	0.34866	0.36367
AGA	4	178341928	178373657	91	29	64941	12771	0.10078
ACAN	15	89336674	89428585	301	63	64941	-11876	0.8825
AGER	6	32138745	32162099	60	22	64941	13379	0.090464
AGL	1	100305633	100399579	311	40	64941	11285	0.12955
AGRP	16	67506474	67527716	23	13	64941	0.24666	0.40259
JAG1	20	10608332	10664694	159	44	64941	19817	0.023758
AGT	1	230828269	230860336	147	30	64941	-12727	0.89844
AGTR1	3	148405658	148470790	180	38	64941	-12564	0.89551
AGTR2	23	115291958	115316225	33	11	55863	0.36418	0.35786
APLNR	11	56991051	57014927	59	21	64941	-0.038796	0.51547
AGXT	2	241798162	241828536	141	21	64941	-0.57072	0.7159
NR0B1	23	30312539	30337495	41	17	55863	-0.035476	0.51415
AHCY	20	32858071	32909608	72	21	64941	-0.51774	0.69768
AHR	7	17328276	17395775	75	29	64941	-0.72157	0.76472
AHSG	3	186320850	186349107	95	27	64941	-0.46019	0.67731
AIF1	6	31572969	31594798	76	21	64941	-0.64987	0.74211
AIM1	6	106798683	107028335	1071	92	64941	0.022139	0.49117
AK1	9	130618759	130650022	73	30	64941	0.91846	0.17919
AK2	1	33463541	33512512	93	30	64941	-0.09609	0.53828
AK4	1	65603232	65707828	243	44	64941	-0.98759	0.83832
AKT1	14	105225686	105272080	123	38	64941	0.23742	0.40616
AKT2	19	40726224	40801443	143	31	64941	0.11836	0.45289
ALAD	9	116138592	116173618	120	40	64941	-0.96349	0.83235
ALAS1	3	52222099	52258343	34	16	64941	0.30496	0.3802
ALAS2	23	55025488	55067497	18	16	55863	0.63596	0.2624
ALB	4	74259972	74297129	78	23	64941	-0.1239	0.5493
ALCAM	3	105075557	105305757	697	55	64941	0.3713	0.35521
ABCD1	23	152980323	153020216	49	22	55863	0.0023379	0.49907
ALDH1A1	9	75505578	75663633	301	58	64941	-0.67201	0.74921
ALDH2	12	112194691	112257789	59	20	64941	0.5762	0.28224
ALDH3A1	17	19631297	19661746	66	21	64941	-0.83563	0.79832
ALDH1B1	9	38382661	38408662	131	38	64941	-11744	0.87987
ALDH1A3	15	101409897	101466831	134	39	64941	10326	0.15091
ALDH3B1	11	67766048	67806743	97	27	64941	-0.4625	0.67814
ALDH3B2	11	67419633	67458685	95	23	64941	0.30734	0.37929
ALDH9A1	1	165621449	165677900	246	35	64941	-0.88807	0.81275
ALDH3A2	17	19542064	19590908	96	26	64941	-11045	0.86532
ABCD2	12	39935022	40023843	174	36	64941	0.32772	0.37156
ALDOA	16	30054411	30091741	37	14	64941	0.77035	0.22055
ALDOB	9	104172842	104208062	117	30	64941	-0.027733	0.51106
ALDOC	17	26890133	26914282	14	10	64941	0.015651	0.49376
AKR1B1	7	134117107	134153888	92	29	64941	14044	0.080103
ALK	2	29405640	30154477	2599	159	64941	12246	0.11036
ALOX12	17	6889384	6924055	87	21	64941	-0.42465	0.66446
ALOX5	10	45859624	45951569	267	46	64941	0.38036	0.35184
ALOX5AP	13	31277615	31348565	326	47	64941	-0.45161	0.67422
ALOX12B	17	7965954	8001021	114	35	64941	0.50393	0.30716
ALOX15	17	4524214	4555583	64	23	64941	-0.92715	0.82307
ALOX15B	17	7932343	7962452	123	28	64941	0.29679	0.38331
ALPI	2	233310833	233335455	91	25	64941	10944	0.13689
ALPL	1	21825475	21914905	369	55	64941	-0.88214	0.81115
ALPP	2	233233348	233257599	79	31	64941	0.61011	0.2709
ALPPL2	2	233261552	233285424	73	22	64941	0.81488	0.20757
ALX3	1	110592997	110623322	53	16	64941	-0.46214	0.67801
AMBN	4	71447975	71483005	127	33	64941	-21938	0.98588
AMBP	9	116812407	116850752	140	33	64941	-16236	0.94777
AMD1	6	111125823	111226916	312	39	64941	0.92932	0.17636
AMELX	23	11301533	11328881	41	14	55863	0.28135	0.38922
AMFR	16	56385364	56469450	198	33	64941	0.85468	0.19637
AMH	19	2239113	2262072	81	29	64941	-0.026024	0.51038
AMHR2	12	53807594	53835439	40	10	64941	-0.15124	0.56011
AMPD1	1	115205719	115248239	99	29	64941	-14537	0.92699
AMPD2	1	110152435	110184677	70	24	64941	-13792	0.91608
AMPD3	11	10461846	10539126	299	60	64941	15229	0.063891
AMPH	7	38413297	38681167	1123	72	64941	0.59651	0.27542
BIN1	2	127795599	127874903	333	52	64941	0.90935	0.18158
AMT	3	49444211	49470111	38	13	64941	15615	0.059201
AMY1B	1	104220039	104253519	1	1	64941	0.88131	0.18908
AMY1C	1	104277833	104311312	15	8	64941	0.55237	0.29035
AMY2A	1	104149999	104178400	15	13	64941	-13546	0.91223
AMY2B	1	104085894	104132156	55	22	64941	-0.053181	0.52121
ANG	14	21142336	21172345	138	36	64941	-0.73661	0.76932
ANGPT1	8	108251710	108520254	858	80	64941	-11292	0.87058
ANGPT2	8	6347172	6430784	498	65	64941	0.55673	0.28886
ANK1	8	41500744	41764280	805	95	64941	-0.18695	0.57415
ANK2	4	113729239	114314896	1694	137	64941	-0.40848	0.65854
ANK3	10	61776056	62503284	2249	99	64941	12467	0.10626
ANPEP	15	90318126	90368119	189	46	64941	0.2625	0.39647
SLC25A4	4	186054417	186081538	68	21	64941	0.045481	0.48186
SLC25A5	23	118592363	118615359	38	11	55863	-11585	0.87666
ANXA1	9	75756721	75795309	113	34	64941	-0.32779	0.62846
ANXA2	15	60629350	60700185	177	39	64941	14906	0.068028
ANXA3	4	79462742	79541605	197	37	64941	11296	0.12933
ANXA4	2	69937946	70063596	298	47	64941	-11409	0.87305
ANXA5	4	122579152	122628147	191	30	64941	-0.24114	0.59528
ANXA6	5	150470267	150547443	295	50	64941	14185	0.078027
ANXA7	10	75125189	75183841	89	22	64941	0.56671	0.28545
ANXA11	10	81904880	81975433	264	40	64941	0.31487	0.37643
ANXA13	8	124683034	124759647	232	48	64941	-0.50664	0.6938
AOAH	7	36542549	36774154	674	90	64941	-0.33186	0.63
AOC2	17	40986609	41012724	16	14	64941	0.55539	0.28931
AOX1	2	201440731	201546218	314	44	64941	0.56405	0.28636
APAF1	12	99029078	99139211	214	35	64941	-0.56773	0.71489
NUDT2	9	34319504	34353711	67	18	64941	0.63816	0.26168
APOF	12	56744355	56766583	19	11	64941	0.22288	0.41181
APBA1	9	72032448	72297275	608	67	64941	-0.094003	0.53745
APBA2	15	29201570	29420518	636	78	64941	0.75173	0.22611
APBB1	11	6406355	6450644	101	40	64941	-0.22661	0.58964
APBB2	4	40802044	41228731	1463	75	64941	-0.4232	0.66393
APC	5	112033202	112191936	353	47	64941	10247	0.15276
APCS	1	159547616	159568661	86	17	64941	12171	0.11178
AIRE	21	45695721	45728102	155	38	64941	-0.8396	0.79943
APEH	3	49701427	49730936	37	13	64941	16346	0.051068
APEX1	14	20913290	20935931	69	20	64941	14353	0.075603
BIRC2	11	102207913	102259401	101	29	64941	0.065018	0.47408
BIRC3	11	102178181	102220134	61	28	64941	0.14694	0.44159
XIAP	23	122983662	123057829	175	19	55863	-0.7252	0.76583
BIRC5	17	76200277	76231716	144	32	64941	1952	0.02547
APLP1	19	36348806	36380699	72	15	64941	-11907	0.88312
APLP2	11	129929716	130024706	279	41	64941	-0.60683	0.72802
APOA1	11	116696467	116718338	82	22	64941	-0.83201	0.7973
APOA2	1	161182083	161203418	55	20	64941	-0.067543	0.52693
APOA4	11	116681418	116704011	86	25	64941	0.50978	0.3051
APOB	2	21214301	21276945	104	31	64941	21609	0.015351
APOBEC1	12	7791996	7833195	180	27	64941	18798	0.030069
APOC1	19	45407577	45432606	65	29	64941	0.35845	0.36
AQP8	16	25218285	25250253	113	30	64941	1764	0.03887
APOC2	19	45439239	45462822	83	19	64941	20952	0.018075
APOC3	11	116690624	116713787	97	27	64941	0.48192	0.31493
APOC4	19	45435495	45458753	79	20	64941	20989	0.017912
APOD	3	195285573	195321076	145	38	64941	0.23752	0.40613
APOE	19	45399039	45422650	61	25	64941	10119	0.1558
APOH	17	64198147	64235556	128	25	64941	10308	0.15133
APP	21	27242861	27553446	814	83	64941	-0.96001	0.83147
APRT	16	88865877	88888342	135	26	64941	0.01955	0.4922
KLK3	19	51348171	51374020	177	35	64941	0.45048	0.32618
FAS	10	90740288	90785542	212	32	64941	11378	0.1276
FASLG	1	172618185	172646013	62	18	64941	0.061622	0.47543
SHROOM2	23	9744496	9927585	394	77	55863	16246	0.05212
AQP1	7	30941415	30975131	93	34	64941	2213	0.01345
AQP2	12	50334524	50362664	70	25	64941	0.074481	0.47031
AQP3	9	33431152	33457631	98	29	64941	0.10815	0.45694
AQP4	18	24422007	24455735	108	34	64941	0.81982	0.20616
AQP5	12	50345279	50369465	45	19	64941	19624	0.024858
AQP6	12	50350874	50380922	50	22	64941	18156	0.034717
AQP7	9	33374948	33412643	81	32	64941	0.89305	0.18592
AQP9	15	58420374	58488110	231	45	64941	0.76741	0.22142
AR	23	66753874	66960461	146	38	55863	-0.12446	0.54952
ABCC6	16	16233422	16328083	275	45	64941	-0.50598	0.69357
ARAF	23	47410499	47441320	31	15	55863	-10938	0.86299
ARCN1	11	118433078	118483748	91	27	64941	-0.25431	0.60037
TRIM23	5	64875507	64930187	166	25	64941	-0.92627	0.82285
AREG	4	75300853	75330726	29	13	64941	-0.20851	0.58258
ARF1	1	228260361	228296913	56	21	64941	0.35475	0.36139
ARF3	12	49319987	49361309	125	19	64941	-10839	0.8608
ARF4	3	57547090	57593215	122	22	64941	11709	0.12081
ARL4D	17	41466353	41488504	48	11	64941	-0.50101	0.69182
ARF5	7	127218406	127241759	60	18	64941	0.19722	0.42183
ARF6	14	50349736	50373772	36	16	64941	0.029473	0.48824
ARG1	6	131884344	131915472	57	20	64941	-17296	0.95815
ARG2	14	68076579	68128437	103	23	64941	0.12592	0.4499
RHOA	3	49386569	49459526	120	25	64941	21628	0.015278
RHOB	2	20636835	20659201	61	22	64941	-0.078978	0.53147
RHOC	1	113233749	113260025	66	26	64941	0.40101	0.34421
RND3	2	151314707	151354209	92	35	64941	13494	0.088604
RHOG	11	3838208	3872213	81	26	64941	-0.53369	0.70322
ARHGAP1	11	46688625	46732215	63	24	64941	-0.048858	0.51948
ARHGAP4	23	153162830	153201777	53	23	55863	-0.35507	0.63873
ARHGAP5	14	32535664	32638934	91	39	64941	18551	0.031788
ARHGAP6	23	11145663	11693821	945	72	55863	-1165	0.878
ARHGDIA	17	79815595	79839282	68	23	64941	0.70583	0.24015
ARHGDIB	12	15084949	15124562	128	32	64941	29576	0.0015501
ARHGDIG	16	320606	343003	92	34	64941	-12705	0.89804
RHOH	4	40182631	40256384	235	56	64941	21228	0.016886
ARL1	12	101776894	101812192	67	24	64941	-0.46209	0.67799
PHOX2A	11	71940121	71965220	43	17	64941	15749	0.057634
ARL2	11	64771585	64799657	69	22	64941	0.12292	0.45109
ARL3	10	104423484	104484190	105	31	64941	0.34452	0.36523
ARNT	1	150772181	150859244	102	30	64941	0.53088	0.29775
ARNTL	11	13289325	13418813	337	67	64941	0.26212	0.39661
ARR3	23	69478185	69511691	65	22	55863	0.24846	0.40189
ARRB1	11	74961166	75072875	238	56	64941	0.72853	0.23314
ARRB2	17	4603789	4634795	105	29	64941	16853	0.045961
ARSA	22	51051182	51076601	109	28	64941	11641	0.12218
ARSB	5	78063032	78292357	747	79	64941	-0.27559	0.60857
STS	23	7055298	7282682	316	44	55863	0.22684	0.41027
ARSD	23	2812011	2857416	124	32	55863	0.10748	0.4572
ARSE	23	2842673	2896345	59	30	55863	0.18023	0.42849
ARSF	23	2948275	3040770	318	52	55863	-0.69355	0.75602
ART1	11	3653487	3695844	158	42	64941	-11478	0.87448
ART3	4	76922333	77043955	602	47	64941	-0.49801	0.69076
ART4	12	14972245	15006413	94	20	64941	15623	0.059103
ARVCF	22	19944126	20014325	279	45	64941	-0.90263	0.81664
ASAH1	8	17903925	17952507	280	43	64941	-0.73839	0.76986
ASCL1	12	103341452	103364294	57	21	64941	-0.11891	0.54733
ASCL2	11	2279728	2302182	110	22	64941	22892	0.011035
ASGR1	17	7066750	7092883	54	26	64941	-20407	0.97936
ASGR2	17	6994641	7028292	151	34	64941	-16861	0.95412
ASIP	20	32819188	32867150	70	15	64941	0.96287	0.16781
ASL	7	65530776	65568330	92	25	64941	0.58073	0.28071
ASNA1	19	12838306	12869137	29	20	64941	0.023493	0.49063
ASNS	7	97471429	97511854	135	23	64941	-0.15604	0.562
ASPA	17	3367404	3412700	172	38	64941	0.65201	0.2572
ASPH	8	62403115	62637199	586	62	64941	-15808	0.94304
ASS1	9	133310094	133386661	200	50	64941	-0.16952	0.56731
ASTN1	1	176816441	177144024	758	77	64941	0.74143	0.22922
SERPINC1	1	173862938	173896516	71	14	64941	-0.6698	0.74851
ZFHX3	16	72806784	73102534	740	116	64941	0.49516	0.31024
ATF1	12	51147789	51224943	148	31	64941	-0.34625	0.63542
ATF3	1	212728676	212804119	260	48	64941	-0.56417	0.71368
ATF4	22	39906569	39928691	31	14	64941	-0.54609	0.7075
ATIC	2	216166679	216224496	178	25	64941	0.44218	0.32918
ATM	11	108083559	108249829	223	40	64941	10778	0.14056
RERE	1	8402464	8887699	750	73	64941	-0.35455	0.63854
ATOH1	4	94740078	94761142	59	21	64941	-0.2012	0.57973
ATOX1	5	151112383	151148210	68	18	64941	-14719	0.92947
ATP1A1	1	116904802	116958069	87	21	64941	-0.12502	0.54975
ATP1A2	1	160075520	160123381	161	34	64941	0.30756	0.37921
ATP1A3	19	42460628	42508428	41	24	64941	-0.14086	0.55601
ATP12A	13	25244549	25295923	248	40	64941	0.48857	0.31257
ATP1A4	1	160111352	160166767	210	47	64941	-0.04187	0.5167
ATP1B1	1	169065947	169111960	170	38	64941	-0.82218	0.79451
ATP1B2	17	7544254	7571089	115	27	64941	0.68152	0.24777
ATP1B3	3	141585424	141655382	240	33	64941	17853	0.037107
FXYD2	11	117680790	117709408	96	34	64941	20197	0.021708
ATP2A1	16	28879192	28925830	59	21	64941	16398	0.050525
ATP2A2	12	110709032	110798898	197	33	64941	0.052505	0.47906
ATP2A3	17	3817163	3877758	222	45	64941	-10822	0.86041
ATP2B1	12	89971826	90113130	231	42	64941	0.21383	0.41534
ATP2B2	3	10355707	10743131	1424	137	64941	10152	0.155
ATP2B3	23	152773905	152858387	215	39	55863	0.84799	0.19822
ATP2B4	1	203585915	203723209	326	65	64941	13611	0.08674
ATP4A	19	36031095	36064560	80	27	64941	-0.3204	0.62567
ATP4B	13	114293119	114322513	53	22	64941	0.75886	0.22397
ATP5A1	18	43654110	43694199	148	23	64941	-0.28082	0.61058
ALDH7A1	5	125867533	125941104	228	47	64941	17852	0.037111
ATP5B	12	57021959	57049852	49	18	64941	34235	0.00030915
ATP5C1	10	7820093	7859764	125	27	64941	0.46273	0.32178
ATP5D	19	1231749	1254824	55	25	64941	0.89829	0.18452
ATP5E	20	57593733	57617422	40	21	64941	-0.13562	0.55394
ATP5F1	1	111981467	112014540	67	20	64941	-0.91017	0.81863
ATP5G1	17	46960148	46983233	53	15	64941	-0.51234	0.69579
ATP5G2	12	54048944	54080512	82	16	64941	14639	0.071614
ATP5G3	2	176030986	176056490	73	14	64941	0.67998	0.24826
ATP5I	4	656225	678127	45	17	64941	-0.73431	0.76862
ATP5J	21	27086791	27117965	51	22	64941	-0.37418	0.64586
ATP6V1A	3	113455866	113540905	110	25	64941	-0.1126	0.54483
ATP6V1B1	2	71152998	71202561	171	42	64941	-17709	0.96171
ATP6V1B2	8	20044704	20089207	88	28	64941	-14031	0.91971
ATP6V0C	16	2553727	2580224	21	16	64941	0.98033	0.16346
ATP6V1C1	8	104023248	104095285	197	39	64941	-0.79252	0.78597
ATP6V1E1	22	18064902	18121588	230	30	64941	-0.21692	0.58586
ATP6V0B	1	44430118	44453972	34	13	64941	0.79526	0.21323
ATP6V1G2	6	31502228	31524625	125	29	64941	0.84225	0.19982
ATP6V0A1	17	40600862	40684597	115	29	64941	0.21998	0.41294
ATP6AP1	23	153646978	153674862	30	11	55863	-0.40995	0.65908
ATP7A	23	77156194	77315892	97	31	55863	-0.46214	0.67801
ATP5O	21	35265757	35298158	107	28	64941	-0.60552	0.72758
ATP7B	13	52496805	52596181	230	32	64941	-0.29759	0.61699
ATR	3	142158077	142307668	323	44	64941	-15028	0.93355
ATRX	23	76750356	77051755	179	38	55863	-0.14252	0.55667
KIF1A	2	241643181	241769725	369	70	64941	-11124	0.86701
AUH	9	93966097	94134215	393	46	64941	-0.74257	0.77113
AUP1	2	74743775	74767019	18	13	64941	1328	0.092082
AVP	20	3053202	3075370	55	24	64941	-10637	0.85627
AVPR1A	12	63526539	63557971	93	19	64941	-0.040214	0.51604
AVPR1B	1	206214283	206241482	110	21	64941	10972	0.13627
AVPR2	23	153157985	153182620	39	18	55863	-0.14329	0.55697
AXL	19	41715104	41777672	138	36	64941	0.43944	0.33017
AZGP1	7	99554350	99583735	58	19	64941	17056	0.044044
AZU1	19	817831	842017	118	32	64941	-0.40867	0.65861
B2M	15	44993685	45020357	69	23	64941	0.50199	0.30784
BAAT	9	104112699	104157287	145	23	64941	-0.50433	0.69299
BACH1	21	30661151	30744257	86	24	64941	0.21089	0.41649
BAD	11	64027300	64062176	43	22	64941	14603	0.072103
BAG1	9	33242469	33274759	49	14	64941	-0.33512	0.63123
ADGRB1	8	143535377	143636369	231	55	64941	-0.53622	0.7041
ADGRB2	1	32182718	32240494	58	23	64941	-0.80046	0.78828
ADGRB3	6	69335210	70109403	2103	76	64941	-0.92397	0.82225
BAK1	6	33530323	33558072	95	26	64941	0.80969	0.20906
NKX3-2	4	13532454	13556114	64	27	64941	-0.29536	0.61614
BARD1	2	215580370	215684428	477	48	64941	0.5003	0.30843
BAX	19	49448117	49475055	74	23	64941	-0.69584	0.75674
BBS1	11	66268077	66311084	95	24	64941	0.28057	0.38952
BBS2	16	56494301	56564008	147	32	64941	0.80164	0.21138
BBS4	15	72968520	73040817	134	32	64941	-22444	0.9876
BCAT1	12	24952958	25112393	612	80	64941	-0.2538	0.60017
BCAT2	19	49288319	49324320	122	30	64941	0.31269	0.37726
BCHE	3	165480692	165565260	283	33	64941	-10012	0.84164
BCKDHA	19	41893694	41940910	112	22	64941	-16224	0.94764
BCKDHB	6	80806344	81065987	739	49	64941	-0.55905	0.71193
CCND1	11	69445873	69479242	84	27	64941	12461	0.10636
BCL2	18	60780579	60997011	618	94	64941	0.13459	0.44647
BCL2A1	15	80243232	80273643	48	16	64941	10614	0.14426
BCL2L1	20	30242261	30321752	117	29	64941	0.49755	0.3094
BCL2L2	14	23765971	23800241	63	27	64941	0.17729	0.42964
BCL3	19	45236070	45273301	111	26	64941	0.60223	0.27351
BCL6	3	187429165	187473513	135	39	64941	14078	0.079589
BCL7A	12	122449861	122509950	154	33	64941	-0.23004	0.59097
BCL9	1	147003222	147108022	317	51	64941	0.60745	0.27178
TNFRSF17	16	12048964	12071925	90	24	64941	0.88073	0.18923
HCN2	19	579893	627159	270	68	64941	0.74135	0.22924
OPN1SW	7	128402543	128425844	67	19	64941	0.70318	0.24097
BCR	22	23512402	23670224	448	57	64941	2607	0.0045667
BCS1L	2	219514379	219538166	51	13	64941	0.43949	0.33015
BDH1	3	197226654	197310194	349	58	64941	-0.23725	0.59377
BDKRB1	14	96711641	96745304	128	37	64941	-0.31669	0.62426
BDKRB2	14	96661016	96720666	254	57	64941	11163	0.13215
BDNF	11	27666440	27753605	132	30	64941	0.29207	0.38512
CFB	6	31903721	31929861	61	19	64941	24099	0.0079785
BFSP1	20	17464550	17559865	315	62	64941	-0.057728	0.52302
BGLAP	1	156201951	156223123	40	21	64941	-0.56797	0.71497
BGN	23	152750347	152785004	98	32	55863	0.38683	0.34944
CEACAM1	19	43001458	43042661	31	13	64941	-13235	0.90716
BHMT	5	78397604	78438113	111	21	64941	-0.58154	0.71956
BICD1	12	32249713	32546567	1201	68	64941	0.946	0.17207
BID	22	18206906	18267431	219	51	64941	0.21723	0.41401
BIK	22	43496754	43535718	135	36	64941	12309	0.10917
PRDM1	6	106524195	106567814	83	30	64941	0.059885	0.47612
BLK	8	11341521	11432108	373	50	64941	0.88459	0.18819
BLM	15	91250579	91368686	345	50	64941	0.56917	0.28462
BLMH	17	28565213	28629184	105	26	64941	0.0059847	0.49761
CXCR5	11	118744475	118776980	59	27	64941	-0.73094	0.76759
BLVRA	7	43788272	43856941	138	26	64941	-15232	0.93615
BLVRB	19	40943691	40981725	122	33	64941	-0.075544	0.53011
BNC1	15	83914655	83963468	69	20	64941	0.79362	0.21371
BMI1	10	22600139	22630414	11	9	64941	11286	0.12953
BMP1	8	22012653	22079839	208	52	64941	0.067009	0.47329
BMP2	20	6738745	6770910	96	34	64941	-0.45717	0.67622
BMP3	4	81942119	81988685	98	23	64941	-0.67528	0.75025
BMP4	14	54406454	54433554	70	23	64941	0.59225	0.27684
BMP5	6	55608451	55750388	296	57	64941	-0.62189	0.73299
BMP6	6	7717011	7891972	586	72	64941	0.54966	0.29128
BMP7	20	55733809	55851707	386	53	64941	0.51431	0.30352
BMP8B	1	40213903	40264533	193	37	64941	-0.82426	0.7951
BMPR1A	10	88506396	88694945	452	51	64941	0.15204	0.43958
BMPR1B	4	95669128	96089601	1302	76	64941	12158	0.11203
BMPR2	2	203231033	203442474	356	46	64941	14662	0.071299
BMX	23	15472356	15584652	128	32	55863	0.31849	0.37506
POLR3D	8	22092619	22118680	73	21	64941	-0.49435	0.68947
BNIP1	5	172561445	172601390	104	24	64941	-0.34203	0.63383
BNIP2	15	59941345	59991728	212	27	64941	0.73357	0.23161
BNIP3	10	133771204	133805435	116	23	64941	0.33983	0.36699
BNIP3L	8	26229894	26280644	105	25	64941	-0.087485	0.53486
BOK	2	242488146	242523553	132	38	64941	-0.97952	0.83634
DST	6	56312785	56829426	962	80	64941	-0.70926	0.76092
FOXL2	3	138653066	138675982	57	17	64941	-0.3929	0.65281
BPGM	7	134321531	134374568	187	23	64941	-0.48452	0.68599
BPHL	6	3108926	3163833	110	32	64941	0.79487	0.21334
BPI	20	36922552	36975907	172	38	64941	-10288	0.8482
BRCA1	17	41186312	41287500	196	28	64941	0.87268	0.19142
BRAF	7	140405749	140634564	345	44	64941	-0.41899	0.66239
BRCA2	13	32879617	32983809	242	40	64941	0.61347	0.26978
BRDT	1	92404928	92489985	234	31	64941	-0.051214	0.52042
ZFP36L1	14	69244372	69273184	80	21	64941	-0.29593	0.61636
ZFP36L2	2	43439541	43463745	45	21	64941	21536	0.015634
BRS3	23	135554521	135585931	19	8	55863	-0.74725	0.77254
BSG	19	561277	593493	201	42	64941	10311	0.15124
BST1	4	15694573	15751121	219	36	64941	0.10187	0.45943
BST2	19	17492238	17526458	126	25	64941	-12645	0.89698
BTC	4	75661448	75729882	264	39	64941	-0.23129	0.59146
BTD	3	15632864	15699147	143	35	64941	0.27374	0.39214
KLF9	9	72989513	73039573	88	30	64941	0.17917	0.4289
KLF5	13	73619114	73661676	124	34	64941	12062	0.11387
BTF3	5	72784250	72811448	88	18	64941	11109	0.1333
BTG1	12	92524054	92549673	56	21	64941	-0.94772	0.82836
BTK	23	100594435	100651212	106	31	55863	0.27195	0.39283
BTN1A1	6	26490577	26520653	67	18	64941	0.71185	0.23828
BUB1	2	111385275	111445684	61	22	64941	21616	0.015326
BUB1B	15	40443210	40523337	141	32	64941	0.0010067	0.4996
BYSL	6	41878965	41910784	45	16	64941	1374	0.084726
TSPO	22	43537520	43569248	95	27	64941	0.97027	0.16596
C1QBP	17	5326099	5352471	86	25	64941	0.61037	0.27081
SERPING1	11	57355027	57392326	85	24	64941	0.56067	0.28751
C1QA	1	22953118	22976175	75	17	64941	-1248	0.89399
C1QB	1	22969682	22998130	91	20	64941	-0.34376	0.63449
C1QC	1	22959969	22984603	94	19	64941	-0.28826	0.61343
C1S	12	7157819	7188336	50	16	64941	-0.71567	0.7629
C2	6	31855562	31923449	160	35	64941	-0.45525	0.67553
C3	19	6667846	6730662	233	51	64941	0.68431	0.24689
C3AR1	12	8200919	8228955	52	22	64941	0.13043	0.44811
C4A	6	31939834	31980457	33	19	64941	-0.62345	0.73351
C4B	6	31972572	32013195	38	21	64941	-0.048467	0.51933
C4BPA	1	207267583	207328317	144	36	64941	18411	0.032803
C4BPB	1	207252210	207283338	60	20	64941	21759	0.014782
CAPN5	11	76767992	76847201	229	54	64941	-1287	0.90096
C5	9	123704613	123822554	266	41	64941	-0.63158	0.73617
C5AR1	19	47803104	47835327	103	23	64941	0.59249	0.27676
C6	5	41132248	41271588	427	50	64941	-0.85287	0.80313
C7	5	40899599	40993041	352	50	64941	-0.56284	0.71323
C8A	1	57310443	57393894	299	42	64941	0.97192	0.16555
C8B	1	57384883	57443213	222	41	64941	0.92454	0.1776
C8G	9	139829333	139851426	81	27	64941	0.70828	0.23939
OSGIN2	8	90904096	90950096	96	24	64941	0.47034	0.31905
C9	5	39274377	39374655	255	43	64941	0.87749	0.19011
VPS51	11	64853587	64889332	59	19	64941	0.52854	0.29856
MRPL49	11	64879655	64904841	36	15	64941	0.26149	0.39686
ZNHIT2	11	64873875	64895170	33	14	64941	0.81123	0.20862
MPPED2	11	30396040	30618260	556	65	64941	0.56691	0.28539
MYRF	11	61510121	61565990	96	31	64941	0.67559	0.24965
TMEM258	11	61546602	61570085	30	14	64941	-0.17701	0.57025
DAGLA	11	61437905	61524474	173	34	64941	0.074538	0.47029
FMNL1	17	43289192	43334685	90	24	64941	0.56011	0.2877
LDLRAD4	18	13208729	13662753	1248	146	64941	0.64762	0.25861
PTTG1IP	21	46259500	46304487	194	35	64941	-0.73605	0.76915
C21orf2	21	45738827	45769285	81	32	64941	0.72084	0.2355
TMEM50B	21	34794793	34862316	194	33	64941	-0.17544	0.56963
MPPED1	22	43797202	43913688	432	69	64941	-0.11749	0.54676
CA1	8	86230458	86300342	116	30	64941	-0.77579	0.78106
CA2	8	86366131	86403721	48	18	64941	-0.39438	0.65335
CA3	8	86341056	86371269	55	20	64941	0.045752	0.48175
CA4	17	58217302	58246907	55	25	64941	-0.081615	0.53252
CA5A	16	87911625	87980173	353	64	64941	-15402	0.93825
CA6	1	8995893	9045151	189	51	64941	0.19232	0.42375
CA7	16	66868282	66898052	44	14	64941	-0.68741	0.75409
CA8	8	61091423	61203954	392	49	64941	17835	0.037253
CA9	9	35663915	35691156	62	19	64941	-0.4416	0.67061
CA11	19	49131272	49159451	52	18	64941	-0.5066	0.69378
CA12	15	63605730	63684326	202	44	64941	-0.63412	0.737
CACNA1A	19	13307256	13627274	1091	113	64941	-0.20097	0.57964
CACNA1B	9	140762241	141029076	502	68	64941	-0.53533	0.70379
CACNA1C	12	2069952	2817115	2079	183	64941	-0.18059	0.57166
CACNA1D	3	53519076	53857179	799	87	64941	-0.7665	0.77831
CACNA1E	1	181442447	181785920	866	92	64941	-0.31178	0.6224
CACNA1F	23	49051523	49099833	51	22	55863	-11595	0.87688
CACNA1S	1	200998635	201091694	305	61	64941	0.24772	0.40218
DDR1	6	30840694	30877933	136	20	64941	-0.69273	0.75576
CACNA2D1	7	81565760	82083031	1534	122	64941	-0.67434	0.74995
CACNB1	17	37319709	37363956	96	34	64941	-14832	0.93099
CACNB2	10	18419373	18840688	1601	117	64941	-0.90916	0.81837
CACNB3	12	49198215	49232726	48	21	64941	-12357	0.89172
CACNB4	2	152679285	152965593	679	72	64941	13838	0.083215
CACNG1	17	65030652	65062913	84	26	64941	0.72863	0.23311
SLC25A20	3	48884356	48946426	60	24	64941	-0.39822	0.65477
CAD	2	27430258	27476660	131	25	64941	-0.9429	0.82713
CALB1	8	91060836	91105107	93	22	64941	-11472	0.87435
CALB2	16	71382616	71434341	158	34	64941	18281	0.033767
S100G	23	16658281	16682791	53	22	55863	14037	0.080199
CALCA	11	14978214	15003879	40	16	64941	-11863	0.88225
CALCB	11	15085143	15113888	70	19	64941	-0.53185	0.70259
CALCR	7	93043799	93214042	460	57	64941	0.19468	0.42282
CALD1	7	134454164	134665480	541	74	64941	0.29332	0.38464
CALM1	14	90853327	90884619	81	22	64941	20764	0.018928
CALM2	2	47377221	47414229	113	29	64941	0.34652	0.36447
CALM3	19	47094512	47124039	79	26	64941	0.020056	0.492
CALML3	10	5556924	5578231	68	29	64941	-23232	0.98992
CALR	19	13039414	13065304	28	17	64941	12111	0.11292
CALU	7	128369346	128423477	150	33	64941	0.97023	0.16597
CAMK4	5	110549947	110840584	750	86	64941	0.34925	0.36345
CAMK2A	5	149589054	149679403	227	44	64941	0.069481	0.4723
CAMK2B	7	44246749	44375230	348	58	64941	0.89377	0.18572
CAMK2D	4	114362188	114693669	777	81	64941	-15659	0.94131
CAMK2G	10	75562259	75644349	99	27	64941	0.08378	0.46662
CAMLG	5	134064170	134097850	35	21	64941	0.13425	0.4466
CAMP	3	48254837	48276981	27	16	64941	14819	0.069187
CANX	5	179115019	179168642	128	29	64941	0.010665	0.49575
CAPG	2	85611871	85651197	140	26	64941	24438	0.0072661
CAPN1	11	64938686	64989477	102	25	64941	-0.32237	0.62641
CAPN2	1	223879295	223973720	266	44	64941	0.12671	0.44958
CAPN3	15	42636545	42714515	190	31	64941	0.25651	0.39878
CAPNS1	19	36620918	36651255	79	34	64941	-0.093368	0.53719
CAPN6	23	110478327	110523774	47	20	55863	0.49692	0.30962
CAPS	19	5903659	5926222	54	18	64941	-15056	0.93392
CAPZA1	1	113152075	113224241	110	24	64941	16992	0.044636
CAPZA2	7	116492533	116569315	97	25	64941	12408	0.10734
CAST	5	95987741	96120387	398	51	64941	-0.35363	0.63819
CAPZB	1	19655267	19822066	577	55	64941	-0.81636	0.79285
CARS	11	3012152	3088681	222	38	64941	-14207	0.9223
CASP1	11	104886235	104915884	101	18	64941	-0.39969	0.65531
CASP2	7	142975308	143014789	36	23	64941	0.77871	0.21808
CASP3	4	185538850	185580629	111	31	64941	-0.19224	0.57622
CASP4	11	104803594	104849325	114	25	64941	0.28708	0.38703
CASP5	11	104854967	104903895	152	28	64941	-0.84726	0.80158
CASP6	4	110599785	110639814	70	22	64941	0.31287	0.37719
CASP7	10	115428921	115500668	198	32	64941	16692	0.047536
CASP8	2	202088166	202162434	198	38	64941	12309	0.10918
CASP9	1	15807896	15861407	183	26	64941	0.28433	0.38808
CASP10	2	202037621	202104129	119	26	64941	15503	0.060529
CASQ1	1	160150285	160181676	65	27	64941	-12855	0.90069
CASQ2	1	116232624	116321426	389	44	64941	11004	0.13559
CASR	3	121892530	122015350	486	48	64941	-22408	0.98748
CAT	11	34450472	34503607	150	24	64941	0.37818	0.35265
CAV1	7	116154839	116211239	146	31	64941	12477	0.10607
CAV2	7	116129655	116158595	106	16	64941	0.51845	0.30207
CAV3	3	8765486	8798451	142	43	64941	0.15691	0.43766
RUNX2	6	45286054	45528819	575	70	64941	-0.041401	0.51651
RUNX1	21	36150098	36431595	677	110	64941	-0.76897	0.77905
RUNX1T1	8	92957195	93125454	205	41	64941	0.027269	0.48912
CBFA2T3	16	88931263	89053568	525	68	64941	-0.39619	0.65402
RUNX3	1	25216002	25301648	223	50	64941	-0.077771	0.53099
CBFB	16	67053050	67144961	110	26	64941	12699	0.10206
SERPINA6	14	94760585	94799688	137	34	64941	0.41252	0.33998
CBL	11	119066986	119188859	155	37	64941	21947	0.014092
CBLB	3	105364306	105599354	629	64	64941	26012	0.0046451
CBLN1	16	49301828	49325742	62	22	64941	-0.28775	0.61323
SERPINH1	11	75263101	75293849	86	26	64941	0.61724	0.26854
CBR1	21	37432285	37455462	83	22	64941	-0.27067	0.60668
CBR3	21	37496614	37528860	122	18	64941	0.055758	0.47777
CBS	21	44463301	44506472	193	42	64941	0.24193	0.40442
CCIN	9	36155990	36181331	86	20	64941	-0.18196	0.57219
CCBL1	9	131585392	131654354	143	29	64941	0.91761	0.17941
CCK	3	42289315	42317662	60	22	64941	-0.91065	0.81876
CCKAR	4	26473018	26502042	104	25	64941	-0.54145	0.7059
CCKBR	11	6270841	6303363	113	37	64941	-0.21991	0.58703
KRIT1	7	91818283	91885414	71	24	64941	-0.54839	0.70829
CCNA2	4	122727599	122755153	61	19	64941	-0.81725	0.79311
CCNB1	5	68452837	68484072	90	18	64941	-0.30876	0.62125
CCNC	6	99980263	100026849	131	24	64941	0.26679	0.39482
CCND2	12	4372901	4424522	110	47	64941	-0.50285	0.69246
CCND3	6	41892671	42026610	380	57	64941	0.26583	0.39519
CCNE1	19	30292805	30325224	72	24	64941	-0.48267	0.68533
CCNF	16	2469395	2518859	101	25	64941	0.11976	0.45234
CCNG1	5	162854573	162882022	33	13	64941	-20628	0.98043
CCNG2	4	78068357	78101213	91	22	64941	0.065245	0.47399
CCNH	5	86677310	86718850	55	20	64941	10882	0.13824
CCNT1	12	49072241	49120781	109	21	64941	-0.37731	0.64703
CCNT2	2	135666363	135726915	111	15	64941	0.0069275	0.49724
CCT6A	7	56109378	56141682	79	20	64941	14163	0.07835
CD1A	1	158208119	158238059	60	21	64941	0.47987	0.31566
CD1B	1	158287740	158311321	47	16	64941	0.98176	0.16311
CD1C	1	158249563	158274564	29	15	64941	0.97389	0.16506
CD1D	1	158137828	158166217	106	19	64941	24795	0.0065779
CD1E	1	158313486	158337343	82	22	64941	21726	0.014905
CD2	1	117287057	117321851	60	24	64941	10607	0.14441
CD3D	11	118199789	118223459	43	19	64941	0.2488	0.40176
CD3E	11	118165295	118196890	77	20	64941	-0.052226	0.52083
CD3G	11	118205032	118234497	63	24	64941	0.068835	0.47256
CD247	1	167389877	167497847	365	76	64941	0.78915	0.21501
CD4	12	6888638	6939976	159	44	64941	-0.52231	0.69927
CD5	11	60859930	60905324	100	27	64941	0.23203	0.40826
CD5L	1	157786861	157821634	71	28	64941	-0.088737	0.53535
CD6	11	60729113	60797849	247	47	64941	-0.15797	0.56276
CD7	17	80262746	80285480	75	26	64941	21501	0.015772
CD8A	2	87001728	87045519	113	26	64941	-0.75469	0.77478
CD8B	2	87032460	87099047	125	26	64941	0.10669	0.45752
CD9	12	6299482	6357437	97	29	64941	0.30981	0.37835
CD14	5	140001313	140023286	54	13	64941	0.32127	0.374
CD19	16	28933082	28960668	31	17	64941	0.88901	0.187
MS4A1	11	60213251	60248225	77	26	64941	0.3284	0.3713
MS4A3	11	59814101	59848588	92	25	64941	0.61311	0.2699
CD22	19	35810069	35848264	141	48	64941	0.19316	0.42342
CD27	12	6544051	6570884	84	25	64941	-0.44228	0.67086
CD28	2	204561198	204613635	125	26	64941	12387	0.10772
CD80	3	119233140	119288481	204	41	64941	-0.71116	0.76151
CD86	3	121764209	121849990	174	40	64941	-0.64168	0.73946
TNFRSF8	1	12113434	12214264	268	65	64941	11912	0.11679
TNFSF8	9	117645623	117702875	149	32	64941	10054	0.15735
CD33	19	51718335	51753274	80	23	64941	15779	0.057293
SIGLEC6	19	52010951	52045110	200	31	64941	10791	0.14028
CD34	1	208049883	208094742	150	29	64941	-0.37509	0.6462
CD36	7	80221504	80318593	290	35	64941	-0.28972	0.61398
SCARB1	12	125252174	125358519	337	69	64941	32235	0.00063316
SCARB2	4	77069890	77145052	258	37	64941	0.15396	0.43882
CD37	19	49828632	49853863	46	17	64941	0.018232	0.49273
CD38	4	15769921	15860706	267	36	64941	-0.72007	0.76426
ENTPD1	10	97461536	97647023	548	46	64941	2.49	0.006387
ENTPD2	9	139932550	139958503	65	24	64941	0.88123	0.1891
ENTPD6	20	25166327	25217365	154	37	64941	-0.24858	0.59816
ENTPD3	3	40418647	40480110	121	27	64941	0.43476	0.33187
ENTPD5	14	74416169	74496026	291	37	64941	-0.96997	0.83397
CD40	20	44736899	44768384	90	24	64941	-1416	0.92161
CD40LG	23	135720281	135752549	32	13	55863	-0.097149	0.5387
CD44	11	35150417	35263949	406	67	64941	-0.14829	0.55894
CD47	3	107751941	107819935	140	32	64941	-0.57859	0.71857
CD48	1	160638536	160691641	202	50	64941	10113	0.15592
CD53	1	111403821	111452558	169	31	64941	-0.15123	0.5601
CD58	1	117047156	117123715	91	30	64941	0.51643	0.30278
CD59	11	33714556	33768025	164	33	64941	-0.41763	0.66189
CD63	12	56109227	56133457	31	19	64941	-0.58879	0.722
CD68	17	7472805	7495429	47	16	64941	10739	0.14144
CD69	12	9895082	9923497	123	27	64941	-0.05214	0.52079
CD70	19	6572969	6601163	124	30	64941	-0.56196	0.71293
CD72	9	35599976	35628862	57	21	64941	0.65684	0.25564
CD74	5	149771200	149802543	88	32	64941	0.085727	0.46584
CD79A	19	42371190	42395439	27	12	64941	18673	0.030932
CD79B	17	61996098	62019710	49	14	64941	-0.77074	0.77957
CD81	11	2387391	2428649	93	33	64941	-2025	0.97856
ADGRE5	19	14481403	14529537	101	42	64941	0.084727	0.46624
CD151	11	822952	848840	105	29	64941	0.99797	0.15915
CDA	1	20905444	20955401	220	30	64941	-0.71673	0.76323
CDK1	10	62528089	62564610	114	23	64941	-20009	0.9773
CDK11B	1	1561100	1600473	45	18	64941	0.67877	0.24864
LRBA	4	151175811	151946879	1435	70	64941	0.55637	0.28898
CDC5L	6	44345251	44428161	159	35	64941	-0.025803	0.51029
2007-09-01	7	35830596	35956715	229	33	64941	15444	0.061242
CDC6	17	38434146	38469413	35	12	64941	-0.29155	0.61469
CDC20	1	43814626	43838874	33	16	64941	-0.84594	0.80121
CDC25A	3	48188668	48240153	64	20	64941	13203	0.093366
CDC25B	20	3757419	3796765	114	31	64941	-0.38529	0.64999
CDC25C	5	137610959	137684064	146	29	64941	1107	0.13415
CDC27	17	45185310	45276665	207	34	64941	-0.18965	0.57521
CDC34	19	521720	552087	168	45	64941	2.46	0.0069462
CDC42	1	22369120	22429439	152	30	64941	-0.22927	0.59067
CDH1	16	68761128	68879445	354	51	64941	-14294	0.92355
CDH2	18	25520930	25767445	519	66	64941	-0.31413	0.62329
CDH3	16	68668151	68742959	202	39	64941	-10185	0.84578
CDH4	20	59817482	60525673	2978	249	64941	-0.63052	0.73582
CDH5	16	66390525	66448689	182	41	64941	0.89687	0.18489
CDH6	5	31183762	31339253	352	63	64941	-0.30185	0.61862
CDH7	18	63407488	63558175	458	50	64941	0.58935	0.27781
CDH8	16	61671169	62080939	894	79	64941	0.54819	0.29178
CDH9	5	26870709	27048689	529	56	64941	-0.33156	0.62989
CDH10	5	24477209	24655085	623	73	64941	-0.69583	0.75673
CDH11	16	64906794	65170015	888	76	64941	-0.41725	0.66175
CDH12	5	21740870	22863731	2815	159	64941	18564	0.031695
CDH13	16	82650399	83840215	6805	341	64941	16406	0.050443
CDH15	16	89228163	89271900	162	29	64941	0.6332	0.2633
CDH16	16	66932025	66962887	47	20	64941	10019	0.1582
CDH17	8	95129394	95239531	319	51	64941	0.58687	0.27864
CDH18	5	19463140	20585972	2909	148	64941	-0.048309	0.51926
CDK2	12	56350556	56376573	40	21	64941	-0.83639	0.79853
CDK3	17	73986235	74012080	65	20	64941	0.97105	0.16576
CDK4	12	58131510	58156304	24	18	64941	0.0018568	0.49926
CDK5	7	150740899	150765052	55	18	64941	0.37978	0.35205
CDK6	7	92224235	92475941	296	57	64941	18375	0.033066
CDK7	5	68520622	68583257	164	31	64941	-11362	0.87207
CDK8	13	26818262	26989375	434	46	64941	-0.56498	0.71396
CDK9	9	130538305	130563052	53	13	64941	-15578	0.94036
CDKN1A	6	36634237	36665116	112	29	64941	0.011633	0.49536
CDKN1B	12	12860302	12885305	50	15	64941	15069	0.065921
CDKN1C	11	2894448	2917063	60	23	64941	-12287	0.8904
CDKN2A	9	21957751	22004490	71	22	64941	0.62071	0.2674
CDKN2B	9	21992902	22019312	46	18	64941	-0.6007	0.72598
CDKN2C	1	51424367	51450309	23	12	64941	0.4772	0.31661
CDKN2D	19	10667138	10689655	82	19	64941	-16811	0.95363
CDKN3	14	54853657	54896936	108	24	64941	0.1947	0.42281
CDO1	5	115130430	115162405	46	22	64941	0.66984	0.25148
CDR1	23	139855425	139876723	27	13	55863	-0.73088	0.76757
CDR2	16	22347257	22395938	28	17	64941	-12724	0.89838
CDS1	4	85494057	85582493	151	36	64941	-0.5574	0.71137
CDSN	6	31072865	31098252	318	31	64941	-13984	0.919
CD52	1	26634411	26657014	75	15	64941	-0.50574	0.69348
CDX1	5	149536344	149574121	102	26	64941	-0.49372	0.68925
CDX2	13	28526205	28553505	74	21	64941	-0.8543	0.80353
CDX4	23	72657090	72684421	23	10	55863	-0.93611	0.82539
CLGN	4	141299607	141358815	135	24	64941	0.74887	0.22697
CEACAM5	19	42202530	42244437	133	30	64941	0.79844	0.21231
CEBPA	19	33780840	33803430	56	18	64941	-0.45799	0.67652
CEBPB	20	48797120	48819227	39	16	64941	-0.45271	0.67462
CEBPD	8	48639476	48660726	13	12	64941	-0.75558	0.77505
CEBPE	14	23576515	23598820	58	26	64941	0.092872	0.463
CEBPG	19	33854575	33883592	92	24	64941	-0.52501	0.70021
CEL	9	135926741	135957250	48	20	64941	10431	0.14846
CENPA	2	26998857	27033935	68	15	64941	-0.78099	0.7826
CENPB	20	3754498	3777337	48	20	64941	-0.04496	0.51793
CENPC	4	68327989	68421256	294	35	64941	-15103	0.93451
CENPE	4	104016963	104129566	217	32	64941	0.6613	0.25421
CENPF	1	214766522	214847914	283	35	64941	0.11135	0.45567
CES1	16	55826763	55877098	129	35	64941	-0.87464	0.80911
CETN1	18	570369	591524	108	29	64941	17077	0.043848
CETN2	23	151985871	152009301	31	13	55863	-0.23869	0.59433
CETN3	5	89679528	89715611	29	18	64941	-0.24415	0.59644
CETP	16	56985835	57027757	157	40	64941	14856	0.068699
CFL1	11	65612282	65635804	46	18	64941	0.5982	0.27485
CFL2	14	35169588	35194029	95	20	64941	0.22211	0.41211
CTSC	11	88016760	88080941	211	30	64941	0.92614	0.17719
CFTR	7	117110017	117318719	343	51	64941	0.19764	0.42166
CGA	6	87785216	87814865	90	17	64941	14659	0.071333
CGB	19	49516126	49537632	69	23	64941	17274	0.04205
CEACAM3	19	42290522	42325591	75	21	64941	11645	0.12212
CEACAM7	19	42167235	42202196	84	20	64941	11631	0.1224
CEACAM8	19	43074393	43109082	35	18	64941	-0.82115	0.79422
CEACAM4	19	42115344	42143442	95	24	64941	15987	0.054945
CHAD	17	48531853	48557242	53	20	64941	-0.4412	0.67047
RCBTB2	13	49053099	49117341	78	26	64941	2142	0.016096
CHAT	10	50807141	50883150	206	51	64941	-0.83684	0.79866
RCC1	1	28822455	28875708	119	23	64941	-14669	0.92879
CHD1	5	98179689	98274522	192	34	64941	0.1678	0.43337
CHD2	15	93432286	93581237	424	62	64941	0.3424	0.36603
CHD3	17	7778096	7826075	92	25	64941	1672	0.04726
CHD4	12	6669248	6726551	95	23	64941	0.16872	0.43301
AKR1C4	10	5228798	5270910	211	31	64941	-0.93222	0.82439
CHEK1	11	125485031	125556150	163	23	64941	-0.24781	0.59786
FOXN3	14	89612516	90095506	1382	131	64941	-0.23987	0.59479
CHGA	14	93379445	93411638	122	38	64941	-0.65625	0.74417
CHGB	20	5881974	5916007	141	23	64941	-0.46212	0.678
CHI3L1	1	203138059	203165978	95	31	64941	1701	0.044472
CHI3L2	1	111760281	111796062	147	24	64941	0.13208	0.44746
CHIT1	1	203175207	203208860	113	32	64941	0.018572	0.49259
CHKA	11	67810326	67898858	124	33	64941	-12786	0.89948
CHKB	22	51007387	51031428	114	21	64941	13725	0.084946
CHM	23	85106185	85312566	326	46	55863	15322	0.062732
CHML	1	241782166	241809232	80	24	64941	16338	0.05115
CHN1	2	175654042	175880671	314	52	64941	0.15526	0.43831
CHN2	7	29223991	29563944	1159	103	64941	0.85083	0.19743
CHRM1	11	62666151	62699012	67	23	64941	-17415	0.9592
CHRM2	7	136543399	136713720	478	61	64941	0.96484	0.16731
LYST	1	235814331	236057008	338	52	64941	10726	0.14174
CHRM3	1	239539876	240088750	1367	121	64941	0.29576	0.38371
CHRM4	11	46395335	46423122	24	14	64941	0.48572	0.31358
CHRM5	15	34250446	34367295	333	48	64941	0.8948	0.18545
CHRNA1	2	175602320	175639200	88	20	64941	-19394	0.97378
CHRNA2	8	27307278	27346813	147	36	64941	-0.085159	0.53393
CHRNA3	15	78875394	78923637	113	24	64941	-16771	0.95324
CHRNA4	20	61964662	62019487	297	54	64941	0.61063	0.27072
CHRNA5	15	78847862	78897611	110	22	64941	-18418	0.96724
CHRNA7	15	32312686	32472384	306	62	64941	-11462	0.87415
CHRNB1	17	7338406	7370932	59	19	64941	0.8223	0.20545
CHRNB2	1	154530257	154562354	57	23	64941	-0.36161	0.64118
CHRNB3	8	42542562	42602209	244	30	64941	0.1963	0.42219
CHRNB4	15	78906636	78943587	88	26	64941	-0.91682	0.82038
CHRND	2	233380870	233411375	96	24	64941	-0.8167	0.79295
CHRNE	17	4791064	4816369	88	24	64941	-0.53682	0.7043
CHRNG	2	233394424	233421038	82	19	64941	-0.41972	0.66265
CHUK	10	101938123	101999367	140	27	64941	0.1707	0.43223
CIDEA	18	12244318	12287594	135	36	64941	-0.67943	0.75157
CKB	14	103975995	103999196	56	19	64941	0.99573	0.15969
CIRBP	19	1259267	1284809	43	21	64941	0.58525	0.27919
CISH	3	50633885	50659262	31	15	64941	-0.090624	0.5361
TBCB	19	36595888	36626849	95	30	64941	0.15486	0.43847
CKM	19	45799671	45836302	117	33	64941	24706	0.0067444
CKMT1B	15	43875055	43901604	17	5	64941	0.67155	0.25094
CKMT2	5	80518605	80572217	130	28	64941	0.96284	0.16781
ERCC8	5	60159659	60250905	211	30	64941	0.031192	0.48756
CKS1B	1	154937118	154961725	26	11	64941	-13201	0.90659
CKS2	9	91916113	91941618	60	22	64941	-0.24535	0.59691
AP2M1	3	183882634	183911879	65	22	64941	0.52718	0.29903
AP1S1	7	100787685	100814557	74	22	64941	-0.65339	0.74325
AP2S1	19	47331423	47364203	61	35	64941	-0.20708	0.58203
AP3S1	5	115167303	115259778	182	44	64941	0.63563	0.26251
CLC	19	40211893	40238669	117	23	64941	-0.5735	0.71685
CLCA1	1	86924526	86975977	166	39	64941	0.38076	0.35169
CLCN1	7	143003219	143059097	141	39	64941	-0.58377	0.72031
CLCN2	3	184053973	184089439	84	28	64941	0.18546	0.42643
CLCN3	4	170531672	170654338	291	42	64941	0.86058	0.19473
CLCN4	23	10114985	10215700	236	45	55863	0.076234	0.46962
CLCN5	23	49677225	49873892	70	34	55863	0.54464	0.293
CLCN6	1	11856153	11913201	274	31	64941	16253	0.052048
CLCN7	16	1484934	1535085	316	50	64941	0.15001	0.44038
CLCNKA	1	16338486	16370548	183	26	64941	-0.39776	0.6546
CLCNKB	1	16360231	16393821	200	32	64941	-0.63504	0.7373
CLU	8	27444434	27482328	100	26	64941	-0.65949	0.74521
CLIC1	6	31688358	31715095	51	19	64941	-15735	0.94219
CLIC2	23	154495500	154573997	81	18	55863	-0.72585	0.76603
CLK1	2	201707732	201739467	60	23	64941	-0.83003	0.79674
CLK2	1	155222659	155253305	40	17	64941	-24316	0.99248
CLK3	15	74888327	74932542	62	18	64941	-0.50979	0.6949
TPP1	11	6623997	6650692	71	21	64941	-13104	0.90498
CLN3	16	28478600	28515897	53	20	64941	12034	0.11441
CLN5	13	77556059	77586652	90	23	64941	0.047194	0.48118
CLNS1A	11	77317196	77358851	79	23	64941	15232	0.06386
CLPS	6	35752759	35775121	57	23	64941	-14898	0.93186
CLPTM1	19	45447842	45506604	186	31	64941	12697	0.10209
CLTA	9	36180853	36222059	95	28	64941	-0.83134	0.79711
CLTB	5	175809456	175853570	102	31	64941	13806	0.083695
CLTC	17	57687050	57784317	148	27	64941	0.83464	0.20196
CMA1	14	24964712	24987471	77	21	64941	-10233	0.84692
CCR1	3	46233200	46259832	56	14	64941	0.047273	0.48115
CCR3	3	46273872	46318197	122	25	64941	10533	0.14611
CCR4	3	32983066	33006403	41	9	64941	16048	0.054269
CCR5	3	46401633	46427697	76	19	64941	15096	0.065567
CCR6	6	167515295	167564168	201	41	64941	20176	0.021818
CCR7	17	38700021	38731736	56	26	64941	23393	0.0096595
CCR8	3	39361197	39385171	71	23	64941	-0.49371	0.68924
ACKR2	3	42840964	42918775	171	36	64941	10164	0.15471
CMKLR1	12	108671821	108743094	244	55	64941	-0.15332	0.56093
LTB4R	14	24770705	24797242	68	23	64941	0.40087	0.34426
ABCC2	10	101532457	101621662	188	38	64941	-0.50682	0.69386
CNGB1	16	57906244	58015020	371	77	64941	-0.83995	0.79953
CNGA1	4	47927994	48028646	324	37	64941	12942	0.097799
CNGA2	23	150893218	150924036	84	26	55863	0.16772	0.4334
CNGA3	2	98952618	99025064	234	49	64941	0.92291	0.17803
CNGA4	11	6246724	6277066	55	20	64941	0.56618	0.28564
PLK3	1	45255638	45281667	49	15	64941	0.49763	0.30937
CNN1	19	11639579	11671139	74	19	64941	-0.27639	0.60888
CNN2	19	1016274	1049064	199	42	64941	-0.80199	0.78872
CNN3	1	95352507	95402735	179	37	64941	-0.72722	0.76646
CNP	17	40108737	40139754	54	24	64941	-0.22657	0.58962
CNR1	6	88839583	88886063	122	33	64941	-11781	0.88062
CNR2	1	24187005	24295549	251	40	64941	13994	0.080842
CNTF	11	58380146	58403206	40	17	64941	18024	0.035744
CNTFR	9	34541425	34600713	165	37	64941	-10504	0.85323
CNTN1	12	41076244	41476214	1235	69	64941	11763	0.11974
COL1A1	17	48251457	48289003	91	32	64941	-0.87186	0.80836
COL1A2	7	94013873	94070544	149	37	64941	-11058	0.86559
COL2A1	12	48356748	48408285	194	33	64941	1332	0.091438
COL3A1	2	189829099	189887472	153	39	64941	-20491	0.97977
COL4A1	13	110791310	110969496	847	112	64941	-15671	0.94146
COL4A2	13	110949631	111175374	1067	124	64941	-10552	0.85433
COL4A3	2	228019281	228189508	813	79	64941	-10641	0.85635
COL4A4	2	227857427	228039275	524	71	64941	20443	0.020462
COL4A5	23	107673019	107950775	146	39	55863	0.48401	0.31419
COL4A6	23	107388837	107692704	273	47	55863	-0.53781	0.70465
COL5A1	9	137523651	137746689	1035	100	64941	10009	0.15845
COL5A2	2	189886641	190054668	468	45	64941	-0.76453	0.77773
COL6A1	21	47391663	47434963	158	37	64941	-0.27461	0.60819
COL6A2	21	47508033	47562763	265	45	64941	-0.8037	0.78922
COL6A3	2	238222655	238332850	302	58	64941	0.2148	0.41496
COL7A1	3	48591506	48642593	51	26	64941	0.92811	0.17668
COL8A1	3	99347440	99528061	388	50	64941	-0.958	0.83097
COL8A2	1	36550840	36601305	82	24	64941	0.10706	0.45737
COL9A1	6	70915743	71022786	426	54	64941	-0.39938	0.65519
COL9A2	1	40756162	40792939	118	32	64941	10158	0.15486
COL9A3	20	61438414	61482511	214	54	64941	0.20613	0.41834
COL10A1	6	116430085	116457296	64	22	64941	0.1181	0.45299
COL11A1	1	103332023	103584052	1020	42	64941	-0.19666	0.57795
COL11A2	6	33120469	33170245	192	28	64941	15809	0.056948
COL12A1	6	75784042	75925623	214	52	64941	0.77958	0.21782
COL13A1	10	71551644	71728904	811	118	64941	-0.86907	0.80759
COL15A1	9	101695995	101843074	388	63	64941	0.5702	0.28427
COL16A1	1	32107848	32179768	146	37	64941	-0.52683	0.70084
COL17A1	10	105781046	105855638	124	36	64941	0.30543	0.38002
COL19A1	6	70566448	70932157	895	88	64941	-0.8542	0.8035
COMP	19	18883583	18912114	61	27	64941	10748	0.14122
COMT	22	19919263	19967498	205	40	64941	0.24937	0.40154
COPA	1	160248377	160323354	135	37	64941	0.25878	0.3979
COPB1	11	14469049	14531441	111	30	64941	0.41175	0.34026
KLF6	10	3808188	3837473	102	25	64941	0.30066	0.38184
SLC31A1	9	115973808	116036772	184	27	64941	-0.27843	0.60966
SLC31A2	9	115903238	115936422	141	31	64941	0.26633	0.39499
CORT	1	10499776	10522060	34	14	64941	26466	0.0040656
MAP3K8	10	30712950	30760762	100	27	64941	-0.15649	0.56218
COX4I1	16	85823173	85850608	78	24	64941	-0.25225	0.59957
COX5B	2	98252521	98274657	27	10	64941	0.33348	0.36939
COX6A1	12	120865893	120888545	61	19	64941	-1075	0.85881
COX6A2	16	31429052	31449749	23	16	64941	14651	0.071442
COX6B1	19	36129125	36159686	86	24	64941	-0.59442	0.72389
COX6C	8	100880223	100916242	70	19	64941	-0.75258	0.77415
COX7A1	19	36631824	36653771	57	26	64941	-0.78484	0.78373
COX7A2	6	75937391	75963644	44	12	64941	-0.87889	0.81027
COX7B	23	77144961	77170881	15	12	55863	-0.34016	0.63313
COX7C	5	85903784	85926583	26	17	64941	-19658	0.97534
COX8A	11	63732079	63754015	40	11	64941	-0.15163	0.56026
COX10	17	13962719	14121996	430	60	64941	-0.32499	0.62741
COX11	17	53019259	53056064	132	26	64941	0.86863	0.19252
COX15	10	101445886	101502423	91	25	64941	-1.17	0.879
CP	3	148870197	148949832	248	46	64941	-0.30333	0.61918
CPA1	7	130010290	130037949	82	23	64941	-0.83018	0.79678
CPA2	7	129896703	129939638	123	27	64941	0.20556	0.41857
CPA3	3	148573043	148624874	199	30	64941	0.13734	0.44538
CPB1	3	148498917	148587979	293	53	64941	-0.82844	0.79629
CPB2	13	46617201	46705318	276	38	64941	-0.63397	0.73695
CPD	17	28695942	28806675	145	36	64941	0.69377	0.24391
CPE	4	166290097	166429482	566	56	64941	12841	0.099557
CLDN4	7	73235193	73257015	53	9	64941	-10575	0.85485
CLDN3	7	73173327	73194600	45	20	64941	-10048	0.84251
CLDN7	17	7153222	7176863	37	13	64941	0.74959	0.22675
CPM	12	69234955	69367020	387	65	64941	-0.80846	0.79059
CPN1	10	101792065	101851642	177	32	64941	0.37165	0.35508
CPN2	3	194050494	194082063	171	33	64941	-0.1103	0.54392
CPOX	3	98286677	98322470	119	24	64941	-0.98804	0.83843
CPS1	2	211332406	211553831	531	68	64941	0.55293	0.29016
CPT1A	11	68512088	68621878	234	48	64941	-0.93038	0.82391
CPT1B	22	50997290	51027096	148	27	64941	12255	0.1102
CPT2	1	53652101	53689869	63	23	64941	-0.095542	0.53806
CR1	1	207659473	207825110	334	43	64941	0.084691	0.46625
CR1L	1	207808458	207907036	375	44	64941	11799	0.11902
CR2	1	207617645	207673240	148	33	64941	0.042532	0.48304
CRABP1	15	78622666	78650572	61	22	64941	21176	0.017104
CRABP2	1	156659398	156685608	60	31	64941	0.14927	0.44067
CRAT	9	131847073	131883070	65	17	64941	-0.49554	0.68989
CREB1	2	208384616	208480284	147	33	64941	0.4625	0.32186
ATF2	2	175926978	176042934	244	31	64941	0.81618	0.2072
CREBBP	16	3765055	3940121	131	50	64941	-0.65518	0.74382
ATF6B	6	32073045	32106017	66	25	64941	10355	0.15022
CREBL2	12	12754831	12808041	97	25	64941	26417	0.0041247
CREM	10	35405769	35511886	215	25	64941	-13237	0.9072
CRH	8	67078612	67100846	56	17	64941	0.056329	0.47754
CRHBP	5	76238680	76275299	100	21	64941	-0.15996	0.56354
CRHR1	17	43687710	43923194	1043	41	64941	0.025127	0.48998
CRHR2	7	30681559	30749719	173	52	64941	15858	0.056387
CRIP1	14	105942892	105965128	31	19	64941	-0.63542	0.73742
CRIP2	14	105929275	105956507	30	18	64941	-0.75261	0.77416
CRK	17	1314647	1369561	162	31	64941	0.68231	0.24752
CRKL	22	21261714	21318037	124	25	64941	0.25529	0.39925
CRMP1	4	5812491	5904785	359	68	64941	0.81233	0.2083
CRP	1	159672079	159694396	49	15	64941	0.81194	0.20841
HAPLN1	5	82924017	83026896	275	58	64941	24315	0.0075175
CRX	19	48313807	48356587	257	40	64941	-0.98837	0.83851
CRY1	12	107375142	107497635	287	45	64941	-0.07342	0.52926
CRY2	11	45858669	45914799	122	29	64941	-0.37469	0.64606
CRYAA	21	44579141	44602915	81	28	64941	0.83173	0.20278
CRYAB	11	111769350	111792473	38	13	64941	0.24782	0.40214
CRYBA1	17	27563875	27591512	58	18	64941	-0.8889	0.81297
CRYBA2	2	219844912	219868127	20	15	64941	-0.37391	0.64576
CRYBA4	22	27007928	27036636	94	26	64941	20418	0.020585
CRYBB1	22	26985362	27023991	107	26	64941	15908	0.055827
CRYBB2	22	25605612	25637836	154	46	64941	-0.16535	0.56567
CRYBB3	22	25585817	25613326	130	30	64941	0.83084	0.20303
CRYGA	2	209015464	209038366	110	26	64941	10052	0.15741
CRYGB	2	208997297	209020877	97	22	64941	11195	0.13147
CRYGC	2	208982861	209004554	98	20	64941	14944	0.067531
CRYGD	2	208976331	208999313	109	23	64941	14565	0.07262
CRYGS	3	186246232	186273049	34	14	64941	-21355	0.98364
CRYM	16	21259839	21324404	125	34	64941	0.17628	0.43004
CRYZ	1	75161170	75209092	135	28	64941	-0.59622	0.72449
CS	12	56655483	56704175	76	22	64941	-0.18943	0.57512
MAPK14	6	35985412	36089013	252	36	64941	-0.75485	0.77483
CSE1L	20	47652783	47723497	181	27	64941	26179	0.0044235
CSF1	1	110443233	110483616	105	31	64941	-0.58895	0.72205
CSF1R	5	149422854	149502935	244	53	64941	0.92942	0.17633
CSF2	5	131399485	131421863	48	18	64941	-0.012491	0.50498
CSF2RB	22	37299639	37346491	225	50	64941	14481	0.073789
CSF3	17	38161614	38184066	84	18	64941	27912	0.002626
CSF3R	1	36921644	36958915	105	27	64941	14747	0.070141
CSH1	17	61962268	61984027	52	16	64941	0.47639	0.3169
CSH2	17	61939372	61961089	61	14	64941	0.33823	0.36759
CSHL1	17	61976965	61998688	56	21	64941	0.83042	0.20315
CSK	15	75064425	75105539	83	20	64941	-0.75623	0.77524
CSN1S1	4	70786799	70822288	80	19	64941	14934	0.067667
CSN2	4	70810974	70836726	81	18	64941	-0.034028	0.51357
CSN3	4	71098333	71127149	161	17	64941	11819	0.11863
CSNK1A1	5	148863896	148941115	99	25	64941	0.57824	0.28155
CSNK1D	17	80187523	80241594	68	33	64941	25629	0.0051902
CSNK1E	22	38676697	38724089	109	36	64941	-0.14826	0.55893
CSNK1G2	19	1931148	1991337	225	37	64941	0.40969	0.34102
CSNK1G3	5	122837793	122962739	205	30	64941	-13835	0.91674
CSNK2A1	20	453338	534482	160	40	64941	0.51424	0.30354
CSNK2A2	16	58181811	58241782	167	28	64941	-0.19624	0.57779
CSNK2B	6	31622995	31647844	73	23	64941	-11648	0.87796
VCAN	5	82757493	82888122	312	54	64941	-0.80419	0.78936
NCAN	19	19312773	19373061	129	34	64941	22734	0.011501
CSPG4	15	75956663	76015189	91	26	64941	0.010473	0.49582
CSRP1	1	201442658	201486387	177	41	64941	0.17593	0.43017
CSRP2	12	77242495	77282814	125	30	64941	-11314	0.87106
SLC25A10	17	79669266	79698046	132	32	64941	-0.8979	0.81538
CST1	20	23718190	23741574	154	25	64941	-0.52942	0.70174
CST2	20	23794404	23817312	154	28	64941	-16863	0.95413
CST3	20	23598534	23628685	97	19	64941	-0.88064	0.81074
CST4	20	23656277	23679662	82	24	64941	-21213	0.98305
CST5	20	23846572	23870380	70	20	64941	-14176	0.92185
CST6	11	65769462	65790976	67	17	64941	13775	0.084176
CSTA	3	122034011	122070816	107	24	64941	0.057355	0.47713
CSTB	21	45183546	45206256	79	26	64941	-0.24834	0.59806
CSTF1	20	54957427	54989582	86	34	64941	11473	0.12563
CSTF2	23	100065348	100105924	40	13	55863	11575	0.12353
CSTF3	11	33096130	33193037	267	42	64941	2838	0.0022702
NKX2-5	5	172649107	172672315	50	22	64941	10925	0.1373
CTAG1B	23	153835865	153857522	4	4	55863	0.023274	0.49072
CTBS	1	85008804	85058039	124	21	64941	-0.42939	0.66618
CTBP1	4	1195228	1252908	175	34	64941	21706	0.014982
CTBP2	10	126666418	126859624	738	96	64941	-0.98712	0.83821
CTF1	16	30897928	30924881	31	17	64941	0.036095	0.4856
CTGF	6	132259316	132282518	54	23	64941	-10346	0.84958
CTH	1	70866901	70915534	125	30	64941	-0.1239	0.5493
CTLA4	2	204722511	204748683	53	19	64941	0.20967	0.41696
CTNNA1	5	138079075	138280723	320	45	64941	-0.037421	0.51493
CTNNA2	2	79730060	80885993	3309	226	64941	11144	0.13255
CTNS	17	3529762	3576397	166	32	64941	16159	0.053054
CTNNB1	3	41226401	41291939	95	25	64941	-0.44336	0.67125
CTNND1	11	57510756	57596652	104	36	64941	0.17869	0.42909
CTNND2	5	10961952	11914155	2711	201	64941	13519	0.0882
CTPS1	1	41435007	41488237	142	36	64941	-0.97732	0.83579
CTRB1	16	75242884	75268822	161	27	64941	-0.61317	0.73012
CTRL	16	67953473	67975778	16	5	64941	0.26	0.39743
CTSB	8	11690033	11735646	240	38	64941	-12304	0.89072
CTSD	11	1763982	1795222	86	25	64941	0.37596	0.35347
CTSE	1	206307459	206342104	24	10	64941	0.89765	0.18469
CTSG	14	25032724	25055466	56	16	64941	-0.267	0.60527
CTSH	15	79204092	79247436	127	28	64941	-0.47561	0.68282
CTSK	1	150758684	150790917	31	15	64941	-0.21229	0.58406
CTSL	9	90330974	90356384	87	17	64941	-0.36828	0.64367
CTSV	9	99781959	99811925	40	15	64941	26327	0.0042355
CTSO	4	156835270	156885048	208	37	64941	0.32886	0.37113
CTSS	1	150692672	150748433	83	21	64941	0.40168	0.34396
CTSW	11	65637284	65661212	43	16	64941	0.30399	0.38057
CTSZ	20	57560242	57592309	88	23	64941	-0.60799	0.7284
CUX1	7	101449184	101937250	1218	88	64941	-11484	0.8746
CX3CR1	3	39294985	39333226	135	34	64941	0.54616	0.29248
CXADR	21	18875224	18975897	251	49	64941	0.74945	0.22679
TEX28	23	153488930	153533564	13	9	55863	0.33237	0.36981
CYB5A	18	71910527	71969251	218	28	64941	-0.68476	0.75325
CYB561	17	61499665	61533724	52	19	64941	0.035851	0.4857
CYBA	16	88699697	88727492	104	39	64941	-18087	0.96475
CYBB	23	37629266	37682718	52	21	55863	-0.68938	0.75471
CYC1	8	145139960	145162428	46	16	64941	0.21626	0.41439
CYLC1	23	83106134	83151708	47	26	55863	0.18681	0.4259
CYLC2	9	105747593	105790770	150	23	64941	17238	0.042375
CYLD	16	50765961	50845847	133	29	64941	-0.3471	0.63574
CYP1A1	15	75001883	75027951	27	13	64941	0.45918	0.32305
CYP1A2	15	75031184	75058941	71	13	64941	0.044708	0.48217
CYP1B1	2	38284746	38313323	64	17	64941	-0.57189	0.7163
CYP2A6	19	41339441	41366360	87	21	64941	0.77839	0.21817
CYP2A7	19	41371344	41398657	122	28	64941	0.86772	0.19277
CYP3A7	7	99292660	99342853	95	18	64941	-22489	0.98774
CYP2A13	19	41584356	41612100	93	18	64941	-10788	0.85966
CYP2B6	19	41487138	41534308	225	33	64941	-0.2242	0.5887
CYP2C19	10	96512463	96622671	288	33	64941	-11694	0.87887
CYP2C8	10	96786529	96839255	193	26	64941	0.31968	0.37461
CYP2C9	10	96688350	96759486	244	32	64941	-0.98367	0.83736
CYP2C18	10	96433251	96505947	181	32	64941	-0.69061	0.75509
CYP2D6	22	42512501	42536883	71	20	64941	0.010587	0.49578
CYP2E1	10	135330300	135362627	129	23	64941	-0.075042	0.52991
CYP2F1	19	41610312	41644286	133	29	64941	-0.33808	0.63235
CYP2J2	1	60348980	60402445	105	28	64941	-0.50872	0.69452
CYP3A4	7	99344583	99391811	43	18	64941	-20207	0.97834
CYP3A5	7	99235813	99287636	66	26	64941	-0.41299	0.66019
CYP4A11	1	47384846	47417156	79	17	64941	-0.15393	0.56117
CYP4B1	1	47254670	47295021	104	22	64941	0.92409	0.17772
CYP7A1	8	59392737	59422720	73	20	64941	25814	0.0049205
CYP8B1	3	42903684	42927633	68	20	64941	0.19883	0.4212
CYP11A1	15	74620103	74670081	103	20	64941	0.50917	0.30532
CYP11B1	8	143943773	143971236	105	16	64941	0.19096	0.42428
CYP11B2	8	143981975	144009259	124	19	64941	-0.16012	0.56361
CYP17A1	10	104580288	104607290	74	21	64941	23863	0.0085089
CYP19A1	15	51490254	51640795	401	54	64941	-0.57796	0.71835
CYP21A2	6	31996093	32019447	46	24	64941	-0.21936	0.58681
CYP24A1	20	52759985	52800516	213	39	64941	-0.51577	0.69699
CYP26A1	10	94823232	94847641	65	27	64941	-0.7637	0.77748
CYP27A1	2	219636472	219690016	109	25	64941	-0.11288	0.54494
CYP27B1	12	58146117	58170976	24	10	64941	0.42907	0.33394
CYP51A1	7	91731463	91774059	77	13	64941	-0.4571	0.6762
DAB1	1	57450453	58726211	3602	224	64941	-0.053465	0.52132
DAB2	5	39361776	39435335	258	36	64941	0.67013	0.25139
DACH1	13	72002098	72451330	660	96	64941	0.59373	0.27635
DAD1	14	23023807	23068143	258	34	64941	-16127	0.9466
CD55	1	207484817	207544311	119	26	64941	0.69458	0.24366
DAG1	3	49496136	49583051	127	27	64941	12527	0.10516
DGKA	12	56314946	56357811	40	23	64941	13058	0.095817
DGKB	7	14174674	14953281	2514	167	64941	0.31191	0.37756
DGKG	3	185842896	186090023	620	109	64941	-0.87346	0.80879
DGKQ	4	942672	977348	91	28	64941	0.21567	0.41462
DAO	12	109263806	109304710	135	36	64941	-0.85957	0.80499
DAP	5	10669342	10771387	356	42	64941	0.042299	0.48313
DAPK1	9	90102601	90333566	820	94	64941	-17374	0.95884
DAPK3	19	3948451	3981097	80	30	64941	-0.54841	0.7083
DARS	2	136654252	136753254	92	11	64941	-0.019545	0.5078
DAXX	6	33276335	33300793	38	15	64941	12954	0.097588
DAZL	3	16618299	16657006	176	27	64941	0.62129	0.2672
BRINP1	9	121918907	122141739	489	72	64941	-0.404	0.65689
DBH	9	136491485	136534466	193	44	64941	0.10427	0.45848
DBI	2	120114504	120140122	114	22	64941	0.67074	0.25119
DBN1	5	176873613	176910694	65	21	64941	-0.18716	0.57423
DBP	19	49123817	49150639	41	14	64941	-0.24623	0.59725
DBT	1	100642478	100725409	168	26	64941	12153	0.11212
DCC	18	49856542	51072273	4582	118	64941	34117	0.00032279
ECI1	16	2279873	2312296	65	24	64941	12422	0.10708
DCK	4	71849265	71906631	95	28	64941	-0.93564	0.82527
DCN	12	91529035	91586806	51	21	64941	0.3621	0.35864
DCTD	4	183801244	183848630	225	47	64941	-0.85236	0.80299
ACE	17	61544422	61585741	92	26	64941	0.53887	0.29499
DCT	13	95081835	95141936	183	28	64941	-0.73578	0.76907
DCTN1	2	74578281	74629214	62	20	64941	0.79624	0.21295
DCX	23	110527007	110665460	57	35	55863	15651	0.05878
DDB1	11	61056919	61110691	29	20	64941	0.070761	0.47179
DDB2	11	47226493	47270769	101	20	64941	-0.62035	0.73249
DDC	7	50516134	50643154	567	50	64941	-0.064099	0.52555
AKR1C1	10	4995454	5030158	126	28	64941	-0.44743	0.67272
AKR1C2	10	5019967	5070225	234	44	64941	-0.15549	0.56178
GADD45A	1	68140860	68164021	74	18	64941	14094	0.079354
DDIT3	12	57900371	57924300	22	8	64941	-0.85585	0.80396
DDOST	1	20968260	20998037	102	24	64941	0.39324	0.34707
DDT	22	24303554	24332019	49	28	64941	-0.64224	0.73964
DDX1	2	15721745	15781235	185	32	64941	12235	0.11058
DDX3X	23	41182561	41219527	69	22	55863	10904	0.13776
DDX5	17	62484374	62513042	64	21	64941	0.39265	0.34729
DDX6	11	118608472	118671972	132	23	64941	-0.55983	0.7122
DMXL1	5	118396839	118594822	284	53	64941	-0.73947	0.77019
DHX8	17	41551330	41614185	96	24	64941	0.023779	0.49051
DHX9	1	182798439	182867117	89	21	64941	0.52815	0.2987
DDX10	11	108525816	108821650	550	56	64941	0.26572	0.39523
DDX11	12	31216779	31267733	132	26	64941	-0.26194	0.60332
DHX15	4	24519087	24596184	191	36	64941	0.10901	0.4566
DECR1	8	91003580	91074232	166	33	64941	-15101	0.93449
DEFA1	8	6825171	6847614	39	14	64941	-13242	0.90728
DEFA3	8	6863391	6885816	49	23	64941	-0.64223	0.73964
DEFA4	8	6783345	6805786	133	39	64941	-0.10245	0.5408
DEFA5	8	6902829	6924259	123	30	64941	-0.63108	0.73601
DEFA6	8	6772216	6793598	129	38	64941	-0.067825	0.52704
DEFB1	8	6718097	6745529	275	48	64941	0.13616	0.44585
DES	2	220273099	220301461	70	22	64941	-0.2747	0.60823
CFD	19	849665	873624	83	36	64941	0.3129	0.37718
DFFA	1	10510588	10542613	42	13	64941	26481	0.0040469
DFFB	1	3763845	3811993	290	46	64941	-0.01488	0.50594
TIMM8A	23	100565548	100613957	85	28	55863	0.83356	0.20227
DFNA5	7	24727974	24807639	289	42	64941	-0.48853	0.68741
COCH	14	31333741	31374285	95	39	64941	-13456	0.91079
DGUOK	2	74143953	74196088	150	33	64941	-17275	0.95796
DHCR7	11	71135457	71169477	102	21	64941	0.18498	0.42662
DHCR24	1	55305300	55362921	206	33	64941	-0.71177	0.7617
DHFR	5	79912045	79960800	223	26	64941	-16314	0.9486
DHODH	16	72032643	72069316	107	25	64941	-0.50491	0.69319
DHPS	19	12776531	12802701	48	20	64941	-0.75872	0.77599
CYB5R3	22	43003846	43055405	163	33	64941	0.62497	0.26599
NQO1	16	69733304	69770849	93	26	64941	10501	0.14684
DIAPH1	5	140884588	141008622	219	43	64941	-0.37543	0.64633
DIAPH2	23	95929650	96865597	1341	97	55863	-0.3903	0.65184
2001-09-01	16	30379454	30404171	36	17	64941	-0.87173	0.80832
DIO1	1	54349860	54386763	141	27	64941	-10116	0.84414
DIO2	14	80653868	80707397	85	24	64941	-10054	0.84264
DIO3	14	102017688	102039789	42	17	64941	-0.17918	0.5711
DKC1	23	153981031	154015964	20	16	55863	11822	0.11857
DLAT	11	111885538	111945002	55	21	64941	14464	0.074036
DLD	7	107521586	107571643	108	25	64941	0.46677	0.32033
DLG1	3	196759431	197036171	685	57	64941	-0.24546	0.59695
DLG2	11	83156055	85348314	6015	211	64941	0.65668	0.25569
DLG3	23	69654705	69735343	135	36	55863	-0.67059	0.74876
DLG4	17	7083209	7133369	83	29	64941	-0.77648	0.78127
DLST	14	75338594	75380450	102	20	64941	11779	0.11942
DLX1	2	172940208	172964402	58	23	64941	-0.4876	0.68708
DLX2	2	172954166	172977478	57	23	64941	15401	0.061767
DLX3	17	48057369	48082588	81	25	64941	-0.31874	0.62504
DLX4	17	48036562	48062323	70	25	64941	0.043777	0.48254
DLX5	7	96639702	96664143	56	23	64941	-0.40736	0.65813
DLX6	7	96625290	96650352	38	16	64941	-0.05937	0.52367
DMBT1	10	124310181	124413252	362	50	64941	0.85988	0.19493
DMD	23	31127345	33367726	5283	417	55863	-0.38213	0.64882
SARDH	9	136518682	136615077	359	66	64941	-0.7604	0.77649
DMP1	4	88561454	88595513	93	12	64941	-12644	0.89695
DNM1	9	130955634	131027528	156	32	64941	0.84123	0.20011
DMPK	19	46262975	46295815	54	21	64941	0.050065	0.48004
DMRT1	9	831690	979090	715	85	64941	0.46071	0.3225
DMWD	19	46276205	46306060	51	21	64941	0.25147	0.40073
DNA2	10	70163821	70241878	267	34	64941	26575	0.0039366
DNAH5	5	13680437	14021841	1197	81	64941	-1.3	0.90321
DNAH6	2	84733579	85056713	738	66	64941	-0.28791	0.61329
DNAH8	6	38673117	39008574	1180	62	64941	0.029657	0.48817
DNAH9	17	11491748	11883065	967	114	64941	-0.95719	0.83076
DNASE1	16	3651772	3722689	178	37	64941	-0.23678	0.59358
DNASE1L1	23	153619579	153650428	36	12	55863	-0.27579	0.60865
DNASE1L2	16	2276253	2298712	39	15	64941	16192	0.0527
DNASE1L3	3	58168353	58206730	127	28	64941	0.63031	0.26425
DNASE2	19	12976025	13002409	44	16	64941	16741	0.047053
DYNC1H1	14	102420865	102527135	231	39	64941	-12217	0.88909
DYNC1I1	7	95391818	95749634	866	88	64941	-0.33663	0.6318
DYNC1I2	2	172533919	172616668	171	28	64941	-0.37192	0.64503
DYNC1LI2	16	66744796	66795526	99	20	64941	0.87355	0.19118
DNM2	19	10818729	10954169	325	42	64941	11568	0.12367
DNMT1	19	10234021	10315783	157	36	64941	0.27235	0.39268
TRDMT1	10	17169828	17254093	282	31	64941	-12136	0.88755
DNMT3A	2	25441421	25575459	243	57	64941	-0.87906	0.81032
DNMT3B	20	31340191	31407162	199	34	64941	-12563	0.8955
DNTT	10	98054085	98108321	165	28	64941	-0.025581	0.5102
DOCK1	10	128758965	129260780	1842	143	64941	-17351	0.95864
DOCK2	5	169054251	169520386	1502	120	64941	17616	0.039065
DOCK3	3	50702672	51431629	1207	53	64941	14495	0.073595
DOK1	2	74766147	74794678	18	11	64941	0.94734	0.17173
DXO	6	31927588	31950032	61	22	64941	23039	0.010614
DPAGT1	11	118957213	118983124	55	18	64941	14746	0.070158
DPEP1	16	89669716	89717216	168	36	64941	12791	0.10044
DPH1	17	1923431	1957183	91	29	64941	0.14439	0.4426
DPH2	1	44425653	44449043	36	12	64941	0.8667	0.19305
DPP4	2	162838751	162941052	244	47	64941	-0.11391	0.54535
DPT	1	168654695	168708442	229	39	64941	16215	0.052456
DPYD	1	97533299	98396615	2140	145	64941	-15711	0.94192
DPYS	8	105381652	105489281	300	50	64941	0.083085	0.46689
DPYSL2	8	26361709	26525693	660	59	64941	-0.33976	0.63298
DPYSL3	5	146760371	146899619	173	48	64941	15022	0.066518
DR1	1	93801478	93838149	75	19	64941	-0.41658	0.66151
SLC26A3	7	107395912	107453678	171	43	64941	0.041715	0.48336
DRD1	5	174857675	174881163	75	24	64941	10673	0.14291
DRD2	11	113270317	113356413	230	41	64941	26201	0.0043953
DRD3	3	113837499	113928254	253	41	64941	-0.70236	0.75877
DRD4	11	627305	650706	85	33	64941	-0.57303	0.71669
DRD5	4	9773258	9795633	56	20	64941	-0.12242	0.54872
DRG2	17	17981181	18021299	79	16	64941	16852	0.045977
ARID3A	19	915733	982816	249	53	64941	0.6515	0.25736
DRP2	23	100464933	100529485	137	31	55863	0.069966	0.47211
ATN1	12	7023626	7061484	51	25	64941	10136	0.15539
DSC1	18	28699199	28752819	203	29	64941	0.5912	0.27719
DSC2	18	28635938	28692388	89	28	64941	0.032552	0.48702
DSC3	18	28560052	28632781	230	49	64941	-10588	0.85515
DSCAM	21	41374343	42229039	3122	204	64941	0.14688	0.44162
RCAN1	21	35878782	35997382	509	55	64941	-0.84952	0.80221
DSG1	18	28888052	28947394	263	28	64941	-0.14217	0.55653
DSG2	18	29068027	29138814	207	37	64941	0.069723	0.47221
DSG3	18	29017732	29068665	174	31	64941	-1007	0.84302
TSC22D3	23	106946451	107030559	63	28	55863	0.20638	0.41825
DSP	6	7531808	7596946	205	42	64941	0.30831	0.37892
EPYC	12	91347456	91408803	223	27	64941	0.80947	0.20912
DSPP	4	88519681	88548025	71	16	64941	0.75166	0.22613
SLC26A2	5	149330300	149376963	78	24	64941	-0.89372	0.81426
DTNA	18	32063254	32481808	963	83	64941	-1199	0.88474
DTNB	2	25590067	25906516	468	83	64941	-26101	0.99547
HBEGF	5	139702428	139736188	61	22	64941	13017	0.096504
DTX1	12	113484514	113545833	236	46	64941	25986	0.0046808
DTYMK	2	242605157	242636383	148	24	64941	-0.12914	0.55138
ECM2	9	95245829	95308374	145	22	64941	-0.086824	0.53459
DUSP1	5	172185093	172208203	92	23	64941	-0.34051	0.63327
DUSP2	2	96798908	96821206	25	14	64941	0.23743	0.40616
DUSP3	17	41833489	41866368	82	18	64941	-0.54697	0.7078
DUSP4	8	29180579	29218267	99	25	64941	-0.78019	0.78236
DUSP5	10	112247625	112281302	65	24	64941	0.15601	0.43801
DUSP6	12	89731837	89756296	78	14	64941	0.11556	0.454
DUSP7	3	52072935	52100461	32	14	64941	11475	0.12558
DUSP8	11	1565281	1603150	112	23	64941	-0.39561	0.6538
DUSP9	23	152897897	152926781	68	24	55863	0.16782	0.43336
DUT	15	48613215	48645570	36	11	64941	-0.52063	0.69869
DVL1	1	1260658	1294509	98	24	64941	-14172	0.92178
DVL2	17	7118661	7147867	31	13	64941	0.88977	0.18679
DVL3	3	183863099	183901314	74	24	64941	25272	0.0057481
DYRK1A	21	38729859	38897679	434	48	64941	-0.47755	0.68351
TOR1A	9	132565221	132596441	115	20	64941	-0.28437	0.61194
E2F1	20	32253292	32284210	34	19	64941	-0.79706	0.78729
E2F2	1	23822920	23867712	95	22	64941	-0.52715	0.70096
E2F3	6	20392137	20503945	246	61	64941	-0.044027	0.51756
E2F4	16	67216068	67242821	46	17	64941	0.36316	0.35824
E2F5	8	86079619	86136753	75	22	64941	10698	0.14234
E2F6	2	11574501	11616303	175	22	64941	25707	0.0050749
E4F1	16	2263490	2295743	55	20	64941	16004	0.05476
EBF1	5	158112916	158536788	849	85	64941	14187	0.077992
GPR183	13	99936789	99969749	68	20	64941	-11336	0.87152
ECE1	1	21533740	21682034	413	62	64941	11706	0.12087
TYMP	22	50954181	50978514	84	29	64941	-0.46209	0.67799
ECH1	19	39296062	39332497	98	29	64941	-0.1051	0.54185
ECHS1	10	135165987	135196908	102	20	64941	10622	0.14408
ECM1	1	150470487	150496265	55	20	64941	-12791	0.89956
ECT2	3	172458425	172549264	200	37	64941	0.013479	0.49462
EDA	23	68825911	69269322	748	71	55863	-19185	0.97248
S1PR1	1	101692305	101717076	49	25	64941	-10531	0.85385
LPAR1	9	113625542	113811523	550	69	64941	0.71335	0.23781
S1PR3	9	91596324	91630070	99	30	64941	-0.449	0.67328
EDN1	6	12280529	12307427	77	26	64941	-0.66672	0.74752
EDN2	1	41934446	41960348	92	25	64941	-0.0076269	0.50304
EDN3	20	57865499	57911047	102	38	64941	0.14829	0.44106
EDNRA	4	148392069	148476106	173	38	64941	0.32082	0.37417
EDNRB	13	78459616	78559664	345	40	64941	0.76135	0.22323
PHC1	12	9057292	9104063	125	25	64941	0.22243	0.41199
PHC2	1	33779224	33851194	191	36	64941	13445	0.089401
EEF1A1	6	74215473	74240755	58	12	64941	-0.54496	0.70711
EEF1A2	20	62109365	62140668	164	35	64941	10825	0.13952
EEF1B2	2	207014318	207037653	52	17	64941	20089	0.022276
EEF1D	8	144651867	144689845	151	25	64941	-10787	0.85964
EEF1G	11	62317073	62351460	44	15	64941	-0.51504	0.69674
EEF2	19	3966054	3995477	69	28	64941	0.34785	0.36398
EIF2D	1	206754974	206795904	122	27	64941	-0.76327	0.77735
EFNA1	1	155090349	155117386	45	20	64941	-13925	0.91812
EFNA2	19	1276153	1311430	72	33	64941	-0.048467	0.51933
EFNA3	1	155041348	155070014	47	22	64941	-14229	0.92262
EFNA4	1	155026213	155052029	38	19	64941	-0.36327	0.6418
EFNA5	5	106702590	107016596	768	99	64941	-0.29812	0.61719
EFNB1	23	68038840	68072007	43	20	55863	0.99143	0.16074
EFNB2	13	107132079	107197388	129	41	64941	0.47269	0.31822
EFNB3	17	7598520	7624693	58	19	64941	0.023753	0.49052
EGF	4	110824040	110944118	244	40	64941	-0.77982	0.78225
CELSR3	3	48663896	48710348	48	16	64941	18097	0.035172
CELSR2	1	109782641	109828378	130	40	64941	-0.49508	0.68973
MEGF6	1	3394506	3538059	597	96	64941	0.5667	0.28546
MEGF8	19	42819730	42892921	94	22	64941	0.84861	0.19805
MEGF9	9	123353196	123486765	159	32	64941	-0.94148	0.82677
EGFR	7	55076678	55289262	584	95	64941	0.35671	0.36066
EGR1	5	137791181	137815004	62	21	64941	0.12259	0.45122
EGR2	10	64561756	64588927	61	17	64941	22587	0.011951
EGR3	8	22535172	22560815	47	23	64941	-11094	0.86637
EGR4	2	73508057	73530829	21	10	64941	0.87046	0.19202
EHHADH	3	184898412	184981886	148	29	64941	-0.075252	0.52999
EIF1AX	23	20132636	20169966	31	14	55863	11755	0.1199
EIF2S1	14	67817034	67863233	131	25	64941	13382	0.090419
EIF2B1	12	124095570	124128323	105	17	64941	0.68639	0.24623
EIF2S3	23	24063065	24106927	63	26	55863	-0.20497	0.5812
EPHA2	1	16440832	16492582	100	32	64941	0.56632	0.28559
EIF4A1	17	7466024	7492324	58	17	64941	14486	0.073721
EIF4A2	3	186491361	186517686	53	22	64941	-1408	0.92043
EIF4B	12	53389942	53445993	139	23	64941	-0.21487	0.58507
EIF4E	4	99789607	99861786	202	31	64941	-10144	0.84479
EIF4EBP1	8	37878020	37927883	59	26	64941	-0.36718	0.64326
EIF4EBP2	10	72153861	72198374	104	26	64941	11482	0.12544
EIF4G1	3	184022283	184063146	67	23	64941	0.39819	0.34525
EIF4G2	11	10808593	10840582	76	21	64941	0.53072	0.29781
EIF5	14	103790339	103821362	98	24	64941	-0.9376	0.82577
EIF5A	17	7200318	7225782	72	24	64941	-0.82423	0.7951
CELA1	12	51712227	51750463	88	24	64941	-0.21703	0.58591
ELANE	19	840989	866246	80	40	64941	0.3008	0.38178
SERPINB1	6	2822566	2852283	129	36	64941	-0.098438	0.53921
ELAVL2	9	23680097	23836342	418	63	64941	19529	0.025417
ELAVL1	19	8013457	8080529	160	35	64941	0.21034	0.4167
ELAVL3	19	11552143	11601806	128	37	64941	1058	0.14503
ELAVL4	1	50503686	50679442	227	47	64941	-0.52716	0.70096
ELF1	13	41496055	41645544	261	37	64941	-0.45016	0.6737
ELF2	4	139968871	140108372	244	40	64941	-0.8376	0.79887
ELF3	1	201969647	201996316	85	24	64941	-21342	0.98359
ELF4	23	129188895	129254688	79	31	55863	12098	0.11317
ELF5	11	34490342	34545347	190	31	64941	-1324	0.90725
ELK1	23	47483744	47520003	36	13	55863	-0.5512	0.70925
ELK3	12	96578207	96671606	233	48	64941	-0.45224	0.67445
ELK4	1	205567071	205612971	131	29	64941	14308	0.076249
ELN	7	73432119	73494237	127	41	64941	0.63453	0.26287
EML1	14	100194056	100418397	659	82	64941	10141	0.15526
EMD	23	153597597	153619883	21	12	55863	0.51241	0.30418
MARK2	11	63596400	63688492	130	29	64941	-0.86105	0.80539
EMP1	12	13339602	13379708	109	31	64941	0.034899	0.48608
EMP2	16	10612279	10684539	340	67	64941	0.35205	0.3624
EMP3	19	48818629	48843810	87	21	64941	0.6946	0.24365
ADGRE1	19	6877560	6950464	362	49	64941	0.047182	0.48118
EMX1	2	73134604	73172020	60	24	64941	0.21543	0.41472
CTTN	11	70234612	70292690	106	26	64941	15752	0.057603
EMX2	10	119291956	119319057	89	24	64941	0.43988	0.33001
EN1	2	119589747	119615759	57	19	64941	12267	0.10997
EN2	7	155240824	155267526	91	33	64941	0.26568	0.39524
ENDOG	9	131570779	131594955	82	20	64941	-20624	0.98042
ENG	9	130567291	130627052	121	37	64941	-13629	0.91354
ENO1	1	8911059	8949151	64	22	64941	0.72855	0.23314
ENO2	12	7013614	7042860	39	16	64941	-0.36325	0.64179
ENO3	17	4843404	4870426	54	20	64941	0.034028	0.48643
ENPEP	4	111387229	111494493	224	52	64941	-0.14941	0.55938
ENSA	1	150584599	150612098	33	17	64941	0.074225	0.47042
SLC29A1	6	44177242	44211888	89	30	64941	-0.14245	0.55664
EP300	22	41478614	41586081	167	36	64941	1339	0.090282
EPAS1	2	46514541	46623842	339	59	64941	-0.18888	0.5749
EPB41	1	29203603	29456558	438	45	64941	-0.93766	0.82579
EPB41L1	20	34669426	34830721	165	35	64941	17813	0.037429
EPB41L2	6	131150487	131394462	751	60	64941	12326	0.10885
EPB42	15	43479425	43523323	34	17	64941	0.34184	0.36624
DMTN	8	21896660	21950036	178	41	64941	0.81511	0.2075
STOM	9	124091266	124142582	112	33	64941	-10146	0.84484
EPHA1	7	143078205	143115985	92	31	64941	-11155	0.86768
EPHA3	3	89146674	89541284	752	71	64941	-0.16134	0.56409
EPHA4	2	222272747	222447010	434	59	64941	-0.69024	0.75498
EPHA5	4	66175281	66546529	1355	71	64941	11673	0.12154
EPHA7	6	93939738	94139302	505	70	64941	-0.88009	0.81059
EPHA8	1	22880004	22940087	216	46	64941	-0.77747	0.78156
EPHB1	3	134504099	134989309	1482	116	64941	25262	0.0057644
EPHB2	1	23027263	23251823	484	83	64941	0.45347	0.32511
EPHB3	3	184269587	184310196	142	29	64941	15987	0.054941
EPHB4	7	100390187	100435143	113	27	64941	-0.2392	0.59452
EPHB6	7	142542776	142578847	94	21	64941	-0.54855	0.70834
EPHX1	1	225987797	226043264	207	48	64941	-0.67673	0.75071
EPHX2	8	27338519	27412439	184	31	64941	0.11329	0.4549
STX2	12	131264145	131333819	264	40	64941	-16574	0.95128
CLN8	8	1693944	1744736	162	33	64941	0.28653	0.38724
EPO	7	100308423	100331323	50	17	64941	-12338	0.89136
EPOR	19	11477881	11505018	47	18	64941	-0.69153	0.75538
EPRS	1	220131940	220230000	326	33	64941	0.097116	0.46132
EPS8	12	15763075	15952510	186	56	64941	0.75815	0.22418
EPS15	1	51809935	51995026	546	37	64941	-0.9729	0.8347
NR2F6	19	17332692	17366744	145	33	64941	-0.24646	0.59734
ERBB2	17	37834167	37894915	93	29	64941	0.12663	0.44962
ERBB3	12	56463809	56507291	58	22	64941	0.75022	0.22656
ERBB4	2	212230442	213413879	4231	183	64941	-0.43643	0.66874
ERCC1	19	45900591	45992241	247	48	64941	0.10641	0.45763
ERCC2	19	45844649	45883845	107	32	64941	16514	0.049326
EREG	4	75220860	75264477	179	35	64941	-0.038457	0.51534
EYA4	6	133551512	133863258	846	80	64941	0.011892	0.49526
ERCC3	2	128004866	128061752	123	26	64941	14458	0.074121
ERCC4	16	14004014	14056205	129	27	64941	-0.6166	0.73125
ERCC5	13	103488191	103538351	116	26	64941	0.073487	0.47071
ERCC6	10	50652526	50757169	240	35	64941	0.43283	0.33257
ERF	19	42741717	42769309	44	14	64941	14096	0.079332
ERG	21	39729183	40043704	1022	104	64941	21527	0.01567
ERH	14	69836840	69875021	94	21	64941	-0.079026	0.53149
ERN1	17	62106502	62217502	198	48	64941	-1434	0.92421
ERV3-1	7	64440733	64477124	128	26	64941	0.066488	0.47349
FBL	19	40315093	40347054	100	28	64941	-0.30264	0.61892
ESD	13	47335391	47381423	88	24	64941	-0.030616	0.51221
ESR1	6	152001631	152434409	1317	98	64941	-0.45799	0.67652
ESR2	14	64683751	64815268	297	40	64941	0.66704	0.25237
ESRRA	11	64062990	64094215	33	16	64941	-0.46422	0.67875
ESRRB	14	76827690	76978182	551	78	64941	0.025604	0.48979
ESRRG	1	216666588	217321097	2172	163	64941	0.38478	0.3502
ETF1	5	137831782	137888989	102	32	64941	0.64123	0.26069
ETFA	15	76498628	76613810	242	36	64941	0.2146	0.41504
ETFB	19	51838409	51879672	139	33	64941	-0.86116	0.80543
ETFDH	4	159583277	159639842	56	27	64941	25685	0.0051074
ETS1	11	128318656	128467453	328	61	64941	0.5733	0.28322
ETS2	21	40167231	40206879	111	18	64941	-10358	0.84986
ETV1	7	13920854	14041050	452	72	64941	-0.56372	0.71353
ETV2	19	36122647	36146007	50	22	64941	-0.48653	0.68671
ETV3	1	157084459	157118383	44	19	64941	15273	0.063337
ETV4	17	41595211	41633800	77	21	64941	-0.13406	0.55332
ETV5	3	185754106	185836901	143	29	64941	-11426	0.87341
ETV6	12	11792788	12058336	668	104	64941	-0.35275	0.63786
EVC	4	5702924	5826031	623	86	64941	-0.95941	0.83132
MECOM	3	168791287	169391563	1681	130	64941	0.98151	0.16317
EVI2A	17	29633428	29658767	39	10	64941	-13247	0.90737
EVI2B	17	29619888	29651130	45	17	64941	-17349	0.95862
EVPL	17	73992926	74033533	98	33	64941	20162	0.02189
EVX1	7	27272164	27297438	50	16	64941	0.51957	0.30168
EWSR1	22	29653998	29706515	81	29	64941	-0.017344	0.50692
EXT1	8	118801602	119134058	799	88	64941	-0.12634	0.55027
EXT2	11	44107099	44276980	318	47	64941	-0.036088	0.51439
EXTL1	1	26338266	26372955	62	22	64941	-0.82074	0.7941
EXTL2	1	101327928	101371548	47	21	64941	-0.43497	0.66821
EXTL3	8	28548990	28621207	102	30	64941	-0.94028	0.82646
EYA1	8	72099668	72469888	883	107	64941	1722	0.042537
EYA2	20	45513263	45827492	968	102	64941	0.58366	0.27973
EYA3	1	28286855	28425173	213	40	64941	0.2921	0.3851
EZH1	17	40842293	40907095	56	21	64941	0.19608	0.42227
EZH2	7	148494464	148591441	185	38	64941	-0.81895	0.79359
F2	11	46730743	46771056	81	19	64941	-11608	0.87713
F2R	5	76001868	76041595	96	27	64941	14258	0.076969
F2RL1	5	76104833	76141140	77	28	64941	10027	0.15799
F2RL2	5	75901307	75929259	141	31	64941	-0.098057	0.53906
F3	1	94984732	95017413	47	21	64941	10832	0.13935
F5	1	169471192	169565769	393	50	64941	12651	0.10292
F7	13	113750102	113784995	88	30	64941	0.72417	0.23448
F8	23	154054063	154265351	155	37	55863	0.34818	0.36385
F9	23	138602889	138655617	75	27	55863	18757	0.030347
F10	13	113767113	113813843	95	39	64941	0.52844	0.2986
F11	4	187177099	187220835	149	36	64941	0.67171	0.25088
F12	5	176819139	176846577	38	21	64941	0.65294	0.2569
F13A1	6	6134311	6330924	661	104	64941	0.16624	0.43399
F13B	1	196997877	197046568	102	22	64941	0.14441	0.44259
FAAH	1	46849939	46889520	96	23	64941	0.28405	0.38818
FABP4	8	82380732	82405473	84	22	64941	0.023616	0.49058
FABP1	2	88412501	88437650	68	21	64941	11434	0.12643
FABP2	4	120228405	120253316	133	19	64941	-0.39381	0.65314
FABP3	1	31828100	31855923	65	17	64941	18845	0.029751
FABP5	8	82182718	82207012	27	9	64941	1403	0.080314
FABP6	5	159604374	159675729	340	49	64941	-0.13789	0.55484
FABP7	6	123090646	123115219	64	27	64941	-0.54892	0.70847
FANCA	16	89793959	89893066	537	48	64941	1632	0.051337
FANCC	9	97851336	98089991	255	46	64941	-0.80388	0.78927
FANCD2	3	10058113	10153614	247	44	64941	18959	0.028987
FANCE	6	35410116	35444918	110	25	64941	-0.96222	0.83203
ACSL1	4	185666749	185757215	299	50	64941	-0.54247	0.70625
ACSL3	2	223715732	223818119	276	38	64941	0.79948	0.21201
ACSL4	23	108874564	108986621	72	23	55863	-0.011152	0.50445
FAH	15	80435233	80488924	169	33	64941	0.6346	0.26284
PTK2B	8	27158999	27326908	485	56	64941	0.41931	0.3375
BPTF	17	65811644	65990494	301	48	64941	0.52388	0.30018
FANCB	23	14851529	14901184	67	23	55863	-0.47315	0.68195
FANCF	11	22634079	22657387	33	17	64941	-0.90212	0.8165
FANCG	9	35063833	35090043	43	12	64941	0.5419	0.29394
FAP	2	163017194	163110045	151	34	64941	-11251	0.86973
FBLN1	22	45888719	46007014	467	90	64941	14153	0.078487
FARSA	19	13023284	13054558	48	18	64941	-10366	0.85004
FASN	17	80026214	80066106	114	33	64941	25177	0.0059057
FAT1	4	187498937	187657876	474	80	64941	19166	0.027645
FAT2	5	150873653	150958505	300	54	64941	0.37894	0.35237
FAU	11	64878099	64899672	32	14	64941	0.80218	0.21122
FBLN2	3	13563824	13689922	470	72	64941	0.91183	0.18093
FBN1	15	48690503	48947985	411	47	64941	18759	0.030337
FBN2	5	127583601	127883735	718	71	64941	-14475	0.92612
EFEMP1	2	56083097	56161298	234	43	64941	1634	0.05113
FBP1	9	97355415	97412531	220	33	64941	12607	0.10371
FCAR	19	55375549	55411839	236	34	64941	-0.95725	0.83078
FCER1A	1	159243678	159288014	131	30	64941	-14528	0.92686
MS4A2	11	59845734	59875940	88	20	64941	0.40054	0.34438
FCER1G	1	161175087	161199038	56	22	64941	-0.14443	0.55742
FCER2	19	7743643	7777036	201	40	64941	-0.81169	0.79151
FCGR1A	1	149744232	149774074	8	7	64941	-11096	0.8664
FCGR1B	1	120916128	120945944	6	4	64941	-12147	0.88776
FCGR2A	1	161465205	161499360	95	30	64941	-0.40208	0.65619
FCGR2B	1	161622905	161658444	46	24	64941	0.60675	0.27201
FCGR3A	1	161501549	161530413	49	21	64941	0.19355	0.42327
FCGR3B	1	161582986	161611753	64	16	64941	0.96941	0.16617
FCGRT	19	50005536	50039685	81	27	64941	0.30172	0.38143
FKTN	9	108310411	108413399	200	35	64941	0.60637	0.27214
FCN1	9	137787711	137819849	81	23	64941	-0.09251	0.53685
FCN2	9	137762658	137789366	140	32	64941	1899	0.028785
FDFT1	8	11643467	11706818	391	46	64941	-0.79972	0.78806
FDPS	1	155268539	155300457	23	11	64941	-24794	0.99342
FDX1	11	110290661	110345608	174	26	64941	19222	0.027288
FDXR	17	72848619	72879156	66	19	64941	-0.1213	0.54827
FECH	18	55202073	55263969	195	45	64941	10055	0.15733
FEN1	11	61550109	61574716	27	13	64941	-0.16342	0.5649
GPC4	23	132423815	132559205	136	33	55863	0.81474	0.20761
FER	5	108073523	108533373	1587	66	64941	-0.79588	0.78695
FES	15	91417665	91449006	88	29	64941	-10224	0.8467
FGA	4	155494280	155521897	36	15	64941	-0.60333	0.72686
FGB	4	155474132	155503915	73	21	64941	0.6317	0.26379
FGD1	23	54461887	54532599	100	18	55863	-0.64313	0.73993
FGF1	5	141961743	142087635	433	89	64941	-0.15354	0.56101
FGF2	4	123737568	123829390	358	48	64941	10716	0.14195
FGF3	11	69614736	69644192	120	22	64941	-1477	0.93016
FGF4	11	69577797	69600171	96	29	64941	0.23177	0.40836
FGF5	4	81177742	81222171	124	36	64941	25355	0.0056144
FGF6	12	4533308	4564780	82	23	64941	-10891	0.86195
FGF7	15	49705375	49789523	262	31	64941	14483	0.073764
FGF8	10	103519887	103550126	26	15	64941	0.18136	0.42804
FGF9	13	22235215	22288640	122	33	64941	-13704	0.91472
FGF10	5	44295004	44399808	212	36	64941	-0.8123	0.79169
FGF11	17	7331784	7358256	49	17	64941	-0.013479	0.50538
FGF12	3	191847033	192455388	1741	163	64941	0.52969	0.29816
FGF13	23	137703734	138315051	855	112	55863	-0.021005	0.50838
FGF14	13	102363205	103064124	1860	135	64941	-0.6363	0.73771
FGFR1	8	38258656	38336352	128	37	64941	0.00024361	0.4999
FGFR3	4	1785039	1820599	71	31	64941	0.175	0.43054
GPC5	13	92040935	93529490	4156	204	64941	0.54923	0.29142
FGFR2	10	123227844	123367972	277	64	64941	0.63364	0.26316
FGFR4	5	176503906	176535143	112	28	64941	0.17446	0.43075
FGG	4	155515286	155543902	35	13	64941	-0.043735	0.51744
FGL1	8	17711894	17777874	442	40	64941	-0.42801	0.66568
FGR	1	27928800	27971727	72	27	64941	-0.037468	0.51494
FH	1	241650857	241693085	87	27	64941	-0.75129	0.77376
FHIT	3	59725036	61247133	6351	356	64941	0.54944	0.29135
FHL1	23	135218861	135303518	102	24	55863	-0.26821	0.60573
FHL2	2	105967272	106065230	321	63	64941	0.70677	0.23986
FHL3	1	38452439	38481199	66	31	64941	-0.44779	0.67285
FIGF	23	15353713	15412535	99	25	55863	0.4719	0.3185
FKBP1A	20	1339621	1383816	139	35	64941	-0.47238	0.68167
FKBP1B	2	24262584	24296551	97	21	64941	-0.42037	0.66289
FKBP2	11	63998413	64021607	43	16	64941	1369	0.085505
FKBP3	14	45574802	45613732	54	19	64941	-0.34107	0.63347
FKBP4	12	2894108	2924589	48	17	64941	-14308	0.92376
FKBP5	6	35531362	35706360	348	53	64941	0.67415	0.25011
FOXG1	14	29226278	29249483	26	18	64941	0.32398	0.37298
FOXF1	16	86534133	86558070	121	34	64941	-15508	0.93952
FOXF2	6	1380069	1405832	85	39	64941	-0.05285	0.52107
FOXC1	6	1600681	1624132	55	24	64941	-0.018526	0.50739
FOXD1	5	72732083	72754352	46	15	64941	0.29045	0.38574
FOXD4	9	106231	128417	22	11	64941	0.58106	0.2806
FOXI1	5	169522917	169546729	119	26	64941	-0.54134	0.70586
FOXL1	16	86602115	86625304	92	24	64941	0.27157	0.39298
FOXE3	1	47871744	47893724	45	16	64941	-0.4256	0.6648
FOXJ1	17	74122414	74147380	43	21	64941	12002	0.11502
FOXC2	16	86590857	86612539	76	21	64941	-0.58676	0.72132
FOXE1	9	100605537	100628997	99	16	64941	10963	0.13648
FOXM1	12	2956846	2996321	81	27	64941	0.73995	0.22967
FOXD2	1	47891689	47916363	50	17	64941	0.13697	0.44553
FOXS1	20	30422103	30443420	49	21	64941	14511	0.073373
FOXO1	13	41119801	41250734	277	43	64941	-10714	0.858
FOXO3	6	108871026	109015972	217	35	64941	0.58992	0.27762
FLG	1	152264651	152307679	113	22	64941	15374	0.062102
FLI1	11	128546430	128693162	463	77	64941	0.037622	0.48499
FLII	17	18138129	18172230	58	21	64941	-0.32168	0.62615
MLANA	9	5880895	5919822	77	25	64941	0.31104	0.37788
FLNA	23	153566900	153613006	49	18	55863	0.17108	0.43208
FLNB	3	57984127	58167982	440	60	64941	0.22156	0.41233
FLNC	7	128460436	128509328	144	36	64941	11464	0.12582
FLOT2	17	27196356	27234715	56	25	64941	0.95646	0.16942
FLT1	13	28864483	29079265	536	75	64941	0.16026	0.43634
FLT3	13	28567411	28692904	492	53	64941	-0.89613	0.81491
FLT3LG	19	49967455	49999491	88	32	64941	-13612	0.91327
FLT4	5	180018506	180086624	316	59	64941	13274	0.092191
FMO1	1	171207610	171265113	172	39	64941	0.2081	0.41758
FMO2	1	171144388	171191822	220	21	64941	-0.45788	0.67648
FMO3	1	171050018	171096961	172	29	64941	-10773	0.85933
FMO4	1	171273318	171321223	101	22	64941	-11023	0.86484
FMO5	1	146645884	146707390	297	23	64941	-1.03	0.8485
FMOD	1	203299749	203330557	107	26	64941	-0.92462	0.82242
FMR1	23	146983469	147042647	90	30	55863	-0.020886	0.50833
AFF2	23	147572139	148092193	619	90	55863	-0.052956	0.52112
FN1	2	216215177	216310890	292	46	64941	-10716	0.85804
FNTA	8	42901442	42950931	73	24	64941	16576	0.048704
FNTB	14	65443507	65539370	207	40	64941	0.98166	0.16313
FOLH1	11	49158187	49240222	279	34	64941	-12415	0.89279
FOLR1	11	71890602	71917367	60	16	64941	0.12271	0.45117
FOLR2	11	71917819	71942994	63	18	64941	0.75794	0.22424
FOLR3	11	71836771	71860934	103	20	64941	-0.52346	0.69967
FOS	14	75735477	75758937	86	30	64941	-0.81364	0.79207
FOSB	19	45961253	45988437	103	24	64941	0.76731	0.22145
FOSL2	2	28605704	28647516	94	28	64941	30551	0.0011248
FPGS	9	130555137	130586799	69	17	64941	-13448	0.91065
FPR1	19	52239023	52265150	103	34	64941	-0.55877	0.71184
FPR2	19	52254453	52283779	106	30	64941	0.20134	0.42022
FPR3	19	52288411	52339334	200	37	64941	0.2981	0.38281
FXN	9	71640479	71725094	311	49	64941	0.10201	0.45937
FRK	6	116252691	116407360	338	50	64941	0.87878	0.18976
MTOR	1	11156588	11332614	388	41	64941	-0.7147	0.7626
FRG1	4	190851974	190894360	61	15	64941	0.47157	0.31862
FRZB	2	183688002	183741498	153	33	64941	10096	0.15635
FSHB	11	30242563	30266824	49	11	64941	0.95554	0.16965
CENPI	23	100343178	100428667	169	30	55863	12148	0.11221
FSHR	2	49179296	49391666	814	67	64941	0.25045	0.40112
NR5A2	1	199986730	200156552	588	84	64941	0.91736	0.17948
FTH1	11	61721757	61745132	58	20	64941	-13303	0.90829
FTL	19	49457659	49480136	54	20	64941	-10357	0.84982
ADAM2	8	39591254	39705808	266	44	64941	10276	0.15207
NR5A1	9	127233515	127279769	67	28	64941	-0.72849	0.76684
FUCA1	1	24161567	24204859	112	17	64941	1007	0.15696
FUCA2	6	143805949	143843020	76	20	64941	0.48569	0.31359
GAST	17	39858578	39882221	105	16	64941	-0.96936	0.83382
FUS	16	31181431	31216192	25	19	64941	-0.088512	0.53526
FUT1	19	49241268	49268647	87	26	64941	-0.58778	0.72166
FUT2	19	49189228	49219191	94	23	64941	0.42998	0.33361
FUT3	19	5832899	5861485	98	36	64941	0.27428	0.39194
FUT4	11	94267017	94293064	49	20	64941	-0.7058	0.75984
FUT5	19	5855837	5880551	107	31	64941	0.50709	0.30605
FUT6	19	5820637	5849764	103	25	64941	-0.1374	0.55464
FUT7	9	139914626	139937292	52	17	64941	-0.69923	0.7578
FUT8	14	65867310	66220839	811	58	64941	-0.14479	0.55756
KDSR	18	60984971	61044506	125	29	64941	-17339	0.95853
ACKR1	1	159163803	159186290	77	26	64941	-11535	0.87565
FYB	5	39095354	39280759	482	63	64941	-0.62317	0.73341
FYN	6	111971535	112204655	580	61	64941	-11064	0.86572
FZD2	17	42624812	42648630	55	24	64941	-0.44009	0.67006
IFI6	1	27982572	28008724	43	24	64941	0.80833	0.20945
G6PC	17	41042814	41076450	63	21	64941	-0.073036	0.52911
G6PD	23	153749606	153785796	31	15	55863	-0.22705	0.58981
SLC37A4	11	118885061	118911616	72	21	64941	-0.77643	0.78125
GAGE1	23	49353616	49383139	31	13	55863	0.47548	0.31722
XRCC6	22	42007250	42070052	67	23	64941	-1275	0.89884
GAA	17	78065339	78103680	221	30	64941	-16836	0.95387
GAB1	4	144247680	144405718	310	51	64941	0.21372	0.41538
GABBR1	6	29560005	29610962	195	28	64941	24341	0.0074635
GABPA	21	27097258	27154771	95	26	64941	-0.8657	0.80667
GABPB1	15	50559389	50657605	259	38	64941	-0.12774	0.55082
GABRA1	5	161264197	161336965	194	32	64941	12606	0.10373
GABRA2	4	46236470	46402056	348	52	64941	-12578	0.89577
GABRA3	23	151324706	151629831	535	69	55863	-0.069364	0.52765
GABRA4	4	46910917	47006424	318	45	64941	-0.43475	0.66813
GABRA5	15	27101866	27204357	296	61	64941	-12925	0.90192
GABRA6	5	161102658	161139598	88	15	64941	0.34165	0.36631
GABRB1	4	47023295	47442801	992	89	64941	0.63878	0.26148
GABRB2	5	160705426	160985130	687	63	64941	13599	0.086926
GABRB3	15	26778693	27028935	758	88	64941	0.50384	0.30719
GABRD	1	1940768	1972192	84	28	64941	0.23187	0.40832
GABRE	23	151111596	151153156	66	27	55863	-0.89809	0.81543
GABRG1	4	46027786	46136082	343	47	64941	0.21125	0.41635
GABRG2	5	161484648	161592545	205	45	64941	-0.043656	0.51741
GABRG3	15	27206429	27788373	1716	177	64941	-1064	0.85633
GABRP	5	170200723	170251051	170	36	64941	-0.21288	0.58429
GABRR1	6	89877223	89951007	324	43	64941	-0.63503	0.7373
GABRR2	6	89956840	90035018	282	58	64941	-0.81835	0.79342
GAD1	2	171663200	171727661	167	34	64941	0.68987	0.24514
GAD2	10	26495236	26603491	319	40	64941	20151	0.021947
GAGE2C	23	49216171	49243491	1	1	55863	-0.2514	0.59925
GAK	4	833065	936174	381	53	64941	-0.39642	0.6541
GALC	14	88294164	88470009	787	62	64941	0.25418	0.39968
GALE	1	24112089	24137294	21	10	64941	16496	0.049509
B4GALNT1	12	58009678	58037022	53	18	64941	-0.35719	0.63952
GALK1	17	73744018	73771280	59	27	64941	0.2826	0.38874
GALK2	15	49437974	49669955	616	45	64941	0.045656	0.48179
GALR1	18	74952008	74992098	202	38	64941	-0.34533	0.63508
GALNS	16	88870142	88933374	359	51	64941	15687	0.058364
GALNT1	18	33197400	33301798	265	32	64941	-0.66622	0.74736
GALNT2	1	230192956	230427875	945	101	64941	-0.043987	0.51754
GALNT3	2	166594313	166660803	100	26	64941	-0.97833	0.83604
GALT	9	34636586	34660595	43	13	64941	0.70468	0.2405
GAMT	19	1387025	1411569	56	21	64941	-11492	0.87476
GANC	15	42556366	42656599	269	34	64941	-0.089855	0.5358
GAP43	3	115332151	115450334	319	70	64941	0.72006	0.23574
GAPDH	12	6633585	6657537	62	16	64941	11495	0.12517
LRRC32	11	76358568	76391990	82	29	64941	0.26935	0.39383
GARS	7	30624181	30683649	121	28	64941	-0.21064	0.58342
GART	21	34866238	34925223	87	24	64941	0.098443	0.46079
GAS1	9	89549277	89572104	45	14	64941	0.90138	0.18369
GAS2	11	22678160	22844547	413	56	64941	-0.083321	0.5332
GAS6	13	114513522	114577046	274	54	64941	-0.41737	0.6618
GAS8	16	90076056	90121379	191	36	64941	-0.94961	0.82884
GATA1	23	48634982	48662718	14	14	55863	0.56013	0.2877
GATA2	3	128188265	128222030	107	31	64941	0.66096	0.25432
GATA3	10	8077294	8127164	173	44	64941	-0.05504	0.52195
GATA4	8	11524433	11627510	375	60	64941	0.40679	0.34208
GATA6	18	19739404	19792491	59	25	64941	-0.95345	0.82982
GATM	15	45643322	45680980	88	12	64941	-0.10397	0.5414
GBA	1	155194239	155224653	58	18	64941	-1033	0.84919
GBAS	7	56022270	56077875	158	30	64941	0.2861	0.3874
GBE1	3	81528850	81820950	518	62	64941	27417	0.0030562
GBP1	1	89507987	89541043	103	25	64941	-0.66251	0.74618
GBP2	1	89561815	89601842	126	26	64941	16984	0.044713
GBP3	1	89462360	89498556	73	18	64941	-0.05736	0.52287
GBX1	7	150835676	150874867	75	26	64941	-0.2027	0.58031
GBX2	2	237064307	237086652	49	16	64941	0.60423	0.27284
GC	4	72597410	72681237	177	35	64941	-0.18756	0.57439
GCDH	19	12991943	13020813	52	17	64941	16006	0.054728
GCG	2	162989379	163018914	79	24	64941	-0.43207	0.66715
GCGR	17	79752010	79781889	50	19	64941	0.075865	0.46976
GCH1	14	55298723	55379603	222	32	64941	-0.96832	0.83356
GCHFR	15	41046285	41069911	37	19	64941	-0.86939	0.80768
GCK	7	44173870	44239022	198	48	64941	-0.10314	0.54107
GCKR	2	27709470	27756556	85	26	64941	-0.53749	0.70454
BLOC1S1	12	56099818	56123491	36	19	64941	-0.33107	0.6297
KAT2A	17	40255129	40283382	57	18	64941	-0.27436	0.6081
NR6A1	9	127269554	127543589	201	52	64941	-0.14539	0.5578
GCNT1	9	79024752	79132332	406	47	64941	11511	0.12484
GCNT2	6	10511542	10639601	372	57	64941	0.08691	0.46537
OPN1MW	23	153438085	153472352	1	1	55863	-0.53202	0.70264
GCSH	16	81105552	81139980	143	21	64941	0.61779	0.26836
GDF1	19	18969361	19016953	109	31	64941	0.41995	0.33726
GDF2	10	48403092	48426853	50	23	64941	0.26178	0.39674
MSTN	2	190910426	190937455	43	16	64941	0.57892	0.28132
GDF9	5	132186877	132212238	64	18	64941	0.16584	0.43414
GDF10	10	48415785	48449138	95	29	64941	16169	0.052948
GDI1	23	153655259	153681814	30	14	55863	-14264	0.92312
GDI2	10	5797186	5865512	167	38	64941	1087	0.13852
GDNF	5	37802779	37849782	150	30	64941	-0.49934	0.69123
GEM	8	95251481	95284547	98	18	64941	0.03155	0.48742
GFAP	17	42972994	43002920	101	28	64941	13203	0.093372
GFER	16	2024150	2047750	106	20	64941	0.74429	0.22835
GFI1	1	92930318	92962433	55	20	64941	0.66568	0.25281
GFPT1	2	69536901	69624386	159	26	64941	0.35502	0.36129
GFRA1	10	117806436	118043126	725	93	64941	0.51028	0.30493
GFRA2	8	21539530	21682392	353	77	64941	0.93229	0.17559
GFRA3	5	137578069	137620544	73	26	64941	11696	0.12109
GGCX	2	85761978	85798657	112	23	64941	30513	0.0011391
GGT1	22	24969629	25034972	109	39	64941	-0.035507	0.51416
B4GALT1	9	33100636	33177356	271	48	64941	-0.82512	0.79535
GGT7	20	33422523	33470661	78	18	64941	-0.99435	0.83997
GGT5	22	24605622	24651317	151	35	64941	-0.81992	0.79387
GH1	17	61984560	62006206	49	20	64941	0.86742	0.19286
GH2	17	61947572	61970039	61	14	64941	0.60596	0.27227
GHR	5	42413577	42731980	643	69	64941	0.50329	0.30738
GHRH	20	35869489	35897534	68	21	64941	12066	0.11379
GHRHR	7	30993636	31029146	127	38	64941	0.76065	0.22343
GHSR	3	172151081	172176246	78	22	64941	0.60648	0.2721
GIF	11	59586746	59622974	39	18	64941	0.31939	0.37471
GIP	17	47025918	47055955	94	22	64941	-0.070789	0.52822
GIPR	19	46161490	46195717	95	20	64941	0.25918	0.39775
GJA1	6	121746745	121780873	104	24	64941	-0.55316	0.70992
GJA3	13	20702394	20745524	167	43	64941	0.03796	0.48486
GJA4	1	35248559	35271351	84	22	64941	0.33834	0.36755
GJA5	1	147218332	147263165	156	26	64941	12304	0.10928
GJA8	1	147364946	147391396	92	26	64941	-0.70474	0.75952
GJB1	23	70425062	70455065	65	26	55863	10385	0.14952
GJB2	13	20751602	20778605	86	27	64941	-0.62026	0.73246
GJB3	1	35236790	35261967	87	24	64941	0.27592	0.39131
GJB5	1	35210648	35234113	91	29	64941	-0.7352	0.76889
GK	23	30661476	30759579	160	27	55863	-12539	0.89506
GK2	4	80317507	80339372	24	15	64941	27672	0.002827
GLA	23	100642779	100673001	54	21	55863	-0.33492	0.63116
GPC3	23	132659773	133129673	315	69	55863	-0.20317	0.5805
GLB1	3	33028100	33148694	391	46	64941	0.52731	0.29899
GCLC	6	53352139	53419927	225	44	64941	0.40521	0.34266
GCLM	1	94342590	94385154	124	26	64941	0.37556	0.35362
GLDC	9	6522464	6655692	536	78	64941	0.49057	0.31187
GLE1	9	131256971	131314580	79	22	64941	0.35289	0.36209
GLG1	16	74471325	74651042	521	53	64941	0.47228	0.31836
GLI1	12	57843918	57876051	70	25	64941	0.83657	0.20142
GLI2	2	121483441	121760229	739	102	64941	-17189	0.95718
GLI3	7	41990547	42287469	885	102	64941	-0.03842	0.51532
GLI4	8	144323524	144369101	129	27	64941	0.27259	0.39259
GLO1	6	38633701	38680952	145	27	64941	-11151	0.86759
GLP1R	6	39006557	39066657	213	45	64941	16736	0.0471
GLRA1	5	151192074	151314397	258	43	64941	-0.84982	0.80229
GLRA2	23	14537420	14759934	345	55	55863	1297	0.097311
GLRB	4	157987277	158103251	365	41	64941	-10309	0.84872
GLS	2	191735547	191840278	159	32	64941	-11037	0.86513
GLRX	5	95139553	95168577	94	24	64941	-1014	0.84471
GLUD1	10	88799959	88864776	154	29	64941	0.41088	0.34058
GLUD2	23	120171462	120193796	30	13	55863	-0.015584	0.50622
GLUL	1	182340839	182371341	107	22	64941	-0.31781	0.62468
GM2A	5	150622613	150660083	112	26	64941	0.64101	0.26076
GMDS	6	1614035	2255868	1575	147	64941	0.55131	0.29071
GMFB	14	54931202	54965785	56	18	64941	11287	0.12951
GML	8	143906217	143938262	117	24	64941	0.30297	0.38096
GMPR	6	16228811	16305780	177	36	64941	-10919	0.86256
GNA11	19	3084408	3131468	204	55	64941	0.060289	0.47596
GNA12	7	2757739	2893963	434	51	64941	0.47496	0.31741
GNA15	19	3126191	3173766	280	59	64941	-0.35313	0.63801
GNAI1	7	79754140	79858725	255	51	64941	-0.031949	0.51274
GNAI2	3	50254120	50306786	58	21	64941	0.82715	0.20408
GNAI3	1	110081186	110148465	93	29	64941	-0.5928	0.72334
GNAL	18	11679014	11895684	714	87	64941	-1522	0.93599
GNAO1	16	56215251	56401356	501	70	64941	11869	0.11763
GNAQ	9	80325189	80656219	536	59	64941	-0.5906	0.7226
GNAS	20	57404756	57496250	214	50	64941	-0.012489	0.50498
GNAT1	3	50219043	50245129	37	13	64941	11962	0.11581
GNAT2	1	110135889	110165705	55	20	64941	-12329	0.8912
GNAZ	22	23402669	23477224	154	35	64941	21013	0.017806
GNB1	1	1706725	1832552	189	47	64941	0.4041	0.34307
GNB2	7	100261363	100286792	59	24	64941	-0.42357	0.66406
GNB3	12	6939375	6966564	51	20	64941	0.0019563	0.49922
GNG3	11	62465066	62486678	31	16	64941	11756	0.11988
GNG4	1	235700985	235824054	392	62	64941	0.39161	0.34767
GNG5	1	84954006	84982262	111	24	64941	-1386	0.91713
GNG7	19	2501218	2712746	868	122	64941	0.5351	0.29629
GNG10	9	114413851	114442526	116	25	64941	-0.47174	0.68144
GNG11	7	93541016	93565826	81	26	64941	0.7736	0.21958
GNGT1	7	93525820	93550485	101	26	64941	16819	0.046295
GNGT2	17	47273596	47297936	77	23	64941	-11439	0.87367
GNL1	6	30499154	30535371	52	21	64941	1685	0.045996
GNRH1	8	25266774	25292556	37	13	64941	0.7314	0.23227
GNRH2	20	3014268	3036391	46	15	64941	0.12535	0.45012
GNRHR	4	68593093	68631804	109	21	64941	0.046336	0.48152
GNS	12	65097222	65163226	94	32	64941	14765	0.069901
GOLGA1	9	127630573	127713386	116	28	64941	-0.73832	0.76984
GOLGA2	9	131008108	131048286	62	15	64941	13914	0.082058
GOLGA3	12	133335495	133415659	279	49	64941	0.58731	0.2785
GOLGA4	3	37274682	37418370	270	42	64941	0.64257	0.26025
GOLGB1	3	121372046	121478662	200	31	64941	-0.073099	0.52914
GOT1	10	101146627	101200530	91	27	64941	0.1623	0.43554
GOT2	16	58731035	58778246	187	28	64941	0.43362	0.33228
SFN	1	27179633	27200947	26	11	64941	-0.58627	0.72115
GP1BA	17	4825312	4848325	55	17	64941	0.53568	0.29609
GP1BB	22	19701066	19722297	32	20	64941	-15596	0.94057
GP2	16	20310896	20349684	120	34	64941	-0.086764	0.53457
GP5	3	194105550	194129995	91	12	64941	-0.25024	0.5988
GP9	3	128765459	128791254	23	10	64941	-0.81709	0.79306
GPC1	2	241365115	241417495	229	48	64941	-0.3443	0.63469
GPD1	12	50487602	50515103	44	16	64941	12393	0.10761
GPD2	2	157281965	157452915	332	45	64941	20786	0.018827
GPI	19	34845645	34903318	129	28	64941	15919	0.055708
GPLD1	6	24416060	24505433	585	50	64941	0.52731	0.29899
GPM6A	4	176544088	176933842	1230	124	64941	20595	0.019722
GPM6B	23	13779062	13966861	399	69	55863	0.92967	0.17627
GPR1	2	207030040	207092771	163	33	64941	23097	0.010453
CCR10	17	40821420	40843845	28	10	64941	-0.97526	0.83528
GPR3	1	27709148	27732318	29	12	64941	-18424	0.96729
GPR4	19	46083022	46115466	71	29	64941	18464	0.032418
XCR1	3	46052291	46078979	88	18	64941	-0.86309	0.80596
GPR6	6	110289459	110311923	62	19	64941	1249	0.10583
NPBWR1	8	53842468	53863454	95	17	64941	10966	0.13642
NPBWR2	20	62727183	62748184	60	16	64941	-1549	0.93931
CXCR3	23	70825766	70848367	14	13	55863	13659	0.085982
PRLHR	10	120342916	120365160	94	20	64941	-12557	0.89539
GPR12	13	27319337	27344922	87	20	64941	-0.78079	0.78254
UTS2R	17	80320647	80343528	92	18	64941	0.18535	0.42648
GPR15	3	98240743	98261994	48	18	64941	-13161	0.90594
GPR17	2	128393439	128420213	100	35	64941	-0.72255	0.76502
GPR18	13	99896967	99920682	35	15	64941	-0.76113	0.77671
GPR19	12	12803995	12859121	135	36	64941	0.46848	0.31972
GPR20	8	142356585	142387365	89	28	64941	-0.606	0.72774
GPR21	9	125785916	125811380	34	16	64941	-0.91944	0.82107
GPR22	7	107100502	107126125	37	12	64941	-0.1208	0.54807
LPAR4	23	77993206	78024211	55	15	55863	-0.42096	0.66311
MCHR1	22	41065182	41088818	48	19	64941	0.54061	0.29439
GPR25	1	200832083	200853306	80	23	64941	0.67324	0.2504
GPR26	10	125415871	125466915	173	33	64941	0.035917	0.48567
GPR27	3	71793201	71814328	50	18	64941	0.044516	0.48225
GPER1	7	1116443	1143451	109	25	64941	0.23564	0.40686
GPR31	6	167560360	167581319	44	13	64941	-0.21543	0.58529
GPR32	19	51263721	51284989	76	37	64941	0.86772	0.19277
GPR33	14	31942150	31967151	60	24	64941	0.033697	0.48656
GPR34	23	41538221	41566530	31	15	55863	0.64609	0.25911
GPR35	2	241534825	241580676	217	54	64941	-0.67043	0.74871
GPR37	7	124375655	124416079	94	28	64941	0.14192	0.44357
MLNR	13	49784474	49806513	23	12	64941	-12944	0.90223
GPR39	2	133164147	133414169	720	87	64941	-0.041591	0.51659
FFAR1	19	35831645	35854764	90	35	64941	0.094404	0.46239
FFAR3	19	35839249	35861391	58	25	64941	0.40822	0.34156
FFAR2	19	35929185	35952669	92	30	64941	-0.54829	0.70825
GRK4	4	2955232	3052474	293	40	64941	26378	0.0041722
GRK5	10	120957197	121225131	837	90	64941	-0.56047	0.71242
GRK6	5	176843687	176879850	64	25	64941	-0.30305	0.61908
MKNK2	19	2027470	2061243	121	41	64941	-10792	0.85974
GPS1	17	79999746	80025346	72	27	64941	28809	0.0019829
GPS2	17	7205978	7228658	52	19	64941	-0.98011	0.83648
GPT	8	145719465	145742555	32	17	64941	-0.21365	0.58459
GPX1	3	49384609	49405791	29	13	64941	25151	0.0059505
GPX2	14	65395870	65419623	89	22	64941	0.2035	0.41937
GPX3	5	150389999	150418554	82	21	64941	0.5214	0.30104
GPX4	19	1093936	1116787	100	29	64941	-0.77205	0.77996
GPX5	6	28483789	28512728	60	20	64941	30875	0.0010094
GPX7	1	53058043	53084723	69	16	64941	-0.96816	0.83352
GRB2	17	73304157	73411790	256	31	64941	0.1399	0.44437
GRB7	17	37884162	37913538	40	16	64941	10753	0.14111
GRB10	7	50647760	50871159	733	68	64941	0.010991	0.49562
GRB14	2	165339323	165488360	273	50	64941	0.46191	0.32207
RAPGEF1	9	134442157	134625364	462	51	64941	-0.64651	0.74102
GRIA1	5	152860084	153203429	1287	95	64941	-0.59019	0.72247
GRIA2	4	158131736	158297227	265	44	64941	0.89632	0.18504
GRIA3	23	122307996	122634766	499	85	55863	-0.040517	0.51616
GRIA4	11	105470800	105862819	816	76	64941	-0.05578	0.52224
GRID1	10	87349312	88136250	2287	148	64941	0.7651	0.22211
GRID2	4	93215453	94705707	3642	141	64941	-0.78492	0.78375
GRN	17	42412491	42440474	57	25	64941	10353	0.15026
GRIK1	21	30899254	31322282	1219	79	64941	15123	0.065234
GRIK2	6	101831584	102527958	2077	128	64941	0.85566	0.19609
GRIK3	1	37251128	37509844	520	84	64941	-0.8165	0.79289
GRIK4	11	120372465	120869514	1423	147	64941	-0.49853	0.69095
GRIK5	19	42492468	42584278	54	23	64941	-0.057848	0.52307
GRIN1	9	140023609	140073214	94	37	64941	0.78053	0.21754
GRIN2A	16	9837265	10286611	1821	80	64941	-0.30643	0.62036
GRIN2B	12	13703684	14143022	1384	98	64941	0.19376	0.42318
GRIN2C	17	72828162	72866966	82	20	64941	-0.19118	0.57581
GRIN2D	19	48888132	48958188	183	47	64941	-1.23	0.89065
GRINA	8	145054226	145077596	46	12	64941	-0.87352	0.80881
NR3C1	5	142647496	143123322	1093	82	64941	-0.92194	0.82172
ARHGAP35	19	47411824	47518334	150	35	64941	-0.10549	0.54201
GRM1	6	146276032	146768782	945	90	64941	-0.04732	0.51887
GRM2	3	51731081	51762629	35	19	64941	17755	0.037907
GRM3	7	86263230	86504193	464	57	64941	0.49445	0.31049
GRM4	6	33979623	34133399	578	73	64941	-13265	0.90766
GRM5	11	88227256	88806846	1777	66	64941	10442	0.14819
GRM6	5	178395328	178432124	165	40	64941	11779	0.11942
GRM7	3	6892802	7793218	2968	190	64941	0.86572	0.19332
GRM8	7	126068652	126902428	2164	105	64941	19836	0.023651
CXCL1	4	74725109	74747019	70	20	64941	0.16018	0.43637
CXCL2	4	74952752	74974997	30	14	64941	1168	0.1214
CXCL3	4	74892306	74914490	13	8	64941	0.2059	0.41843
GRP	18	56877400	56908003	104	26	64941	-0.56585	0.71425
PDIA3	15	44028326	44074804	71	20	64941	-0.36541	0.6426
GRPR	23	16131424	16181641	47	21	55863	13416	0.089861
GRSF1	4	71671499	71715627	110	21	64941	-17544	0.96032
GSC2	22	19126504	19147796	95	34	64941	0.93619	0.17459
GSK3A	19	42724338	42756736	37	14	64941	0.33913	0.36725
GSK3B	3	119530800	119823264	450	54	64941	0.51389	0.30367
GSN	9	124020380	124105122	195	41	64941	0.56588	0.28574
GSPT1	16	11951985	12020519	149	29	64941	0.72487	0.23427
GSR	8	30525578	30595486	193	36	64941	-0.56055	0.71245
GSS	20	33506236	33553794	79	17	64941	0.73681	0.23062
GSTA1	6	52646178	52678664	85	20	64941	-0.39736	0.65445
GSTA2	6	52604885	52638361	91	26	64941	-16956	0.95502
GSTA3	6	52751437	52784496	112	24	64941	0.53933	0.29483
GSTA4	6	52832746	52870178	149	21	64941	21021	0.017772
GSTM1	1	110220418	110250828	38	17	64941	0.46218	0.32197
GSTM2	1	110200644	110236619	57	20	64941	-0.28397	0.61178
GSTM3	1	110266554	110293660	54	20	64941	0.3654	0.35741
GSTM4	1	110188698	110218123	69	20	64941	0.64774	0.25858
GSTM5	1	110244406	110270890	80	19	64941	0.39592	0.34608
GSTP1	11	67341066	67364125	74	19	64941	0.57471	0.28274
GSTT1	22	24366135	24394284	10	7	64941	0.45512	0.32451
GSTT2	22	24312291	24336106	53	29	64941	-0.67076	0.74881
GSTZ1	14	77777230	77807940	109	29	64941	11166	0.13209
MSH6	2	48000221	48044092	117	30	64941	-0.38993	0.6517
GTF2A1	14	81631796	81697575	122	27	64941	-10761	0.85907
GTF2A2	15	59920261	59959737	125	24	64941	0.67932	0.24847
GTF2B	1	89308321	89367301	166	31	64941	0.11066	0.45594
GTF2E1	3	120451558	120512216	129	33	64941	0.64318	0.26005
GTF2E2	8	30426031	30525738	204	34	64941	0.30819	0.37897
GTF2F1	19	6369580	6403291	133	25	64941	0.66991	0.25146
GTF2F2	13	45684631	45868240	337	46	64941	12623	0.10342
GTF2H1	11	18333816	18398590	141	30	64941	-0.17107	0.56792
GTF2H2	5	70320951	70373516	1	1	64941	-13432	0.91039
GTF2H3	12	124108286	124157151	134	22	64941	16081	0.053902
GTF2H4	6	30865957	30891883	115	17	64941	0.30855	0.37883
GTF2I	7	74061991	74185022	134	35	64941	0.66908	0.25172
GTF3A	13	27988681	28019846	134	26	64941	-12895	0.90138
BRF1	14	105665623	105791914	286	52	64941	-0.85035	0.80243
GTF3C1	16	27461934	27571251	152	36	64941	-0.26934	0.60617
GTF3C2	2	27538716	27590243	51	25	64941	-1074	0.85858
GUCY1A2	11	106534738	106899171	1059	62	64941	-10251	0.84734
GUCA1A	6	42113144	42157794	185	37	64941	-1654	0.95094
GUCA1B	6	42141022	42172694	127	20	64941	-0.40149	0.65597
GUCA2A	1	42618362	42640395	57	22	64941	-0.99896	0.84109
[truncated: 17,212 more rows]

## Sheet: Gene-set analysis
FULL_NAME	TYPE	NGENES	BETA	BETA_STD	SE	P
GO_NEGATIVE_REGULATION_OF_T_CELL_MIGRATION	SET	5	16053	0.025896	0.36876	0.0675
GO_VITAMIN_BINDING	SET	134	0.30706	0.025557	0.071034	0.0775
GO_CLATHRIN_LIGHT_CHAIN_BINDING	SET	7	11527	0.022	0.2724	0.117
GSE21670_IL6_VS_TGFB_AND_IL6_TREATED_STAT3_KO_CD4_TCELL_UP	SET	200	0.23188	0.023537	0.054874	0.012
GSE3982_CTRL_VS_LPS_4H_MAC_UP	SET	196	0.23872	0.02399	0.057171	0.149
BIOCARTA_FAS_PATHWAY	SET	30	0.60539	0.023906	0.14529	0.155
GO_NETRIN_RECEPTOR_ACTIVITY	SET	6	14131	0.02497	0.34441	0.0205
CAIRO_HEPATOBLASTOMA_POOR_SURVIVAL	SET	16	0.74103	0.021378	0.18461	0.03
MODULE_392	SET	18	0.71251	0.021801	0.17797	0.313
GO_GDP_METABOLIC_PROCESS	SET	8	10656	0.021743	0.27452	0.52
PID_CASPASE_PATHWAY	SET	51	0.42509	0.021874	0.11069	0.616
GO_STRESS_ACTIVATED_PROTEIN_KINASE_SIGNALING_CASCADE	SET	301	0.1802	0.02238	0.047244	0.686
GO_PURINE_NUCLEOSIDE_DIPHOSPHATE_METABOLIC_PROCESS	SET	11	0.87847	0.021016	0.23146	0.74
GSE13484_12H_UNSTIM_VS_YF17D_VACCINE_STIM_PBMC_UP	SET	193	0.21931	0.021872	0.058189	0.823
GSE14415_INDUCED_TREG_VS_FOXP3_KO_INDUCED_TREG_UP	SET	188	0.22311	0.021964	0.059274	0.839
GO_N6_METHYLADENOSINE_CONTAINING_RNA_BINDING	SET	7	13747	0.026237	0.36705	0.904
GO_CELLULAR_DEFENSE_RESPONSE	SET	53	0.40983	0.021498	0.11007	0.986
GO_PROTEIN_DE_ADP_RIBOSYLATION	SET	5	14496	0.023385	0.38954	0.994
chr4p11	SET	8	2015	0.041114	0.55211	0.00013167
GO_MONOCARBOXYLIC_ACID_BIOSYNTHETIC_PROCESS	SET	190	0.21454	0.021232	0.058809	0.00013247
ZHOU_PANCREATIC_EXOCRINE_PROGENITOR	SET	10	0.99273	0.022645	0.2722	0.00013301
GO_REGULATION_OF_GERMINAL_CENTER_FORMATION	SET	9	0.96561	0.020896	0.26786	0.00015656
GO_GUANYLATE_KINASE_ACTIVITY	SET	9	0.9452	0.020455	0.2628	0.00016167
GO_GMP_METABOLIC_PROCESS	SET	10	0.91328	0.020832	0.25728	0.00019334
GO_MONOCARBOXYLIC_ACID_METABOLIC_PROCESS	SET	464	0.1385	0.021264	0.039225	0.00020767
GO_POSITIVE_REGULATION_OF_HISTONE_H4_ACETYLATION	SET	7	10908	0.020818	0.30995	0.00021709
GO_ASYMMETRIC_NEUROBLAST_DIVISION	SET	6	10506	0.018564	0.29857	0.0002174
GO_NUCLEOSIDE_MONOPHOSPHATE_KINASE_ACTIVITY	SET	21	0.63299	0.020918	0.1802	0.00022231
GO_HISTONE_H4_K12_ACETYLATION	SET	7	0.93535	0.017852	0.26755	0.00023679
GO_NAD_P_PLUS_PROTEIN_ARGININE_ADP_RIBOSYLTRANSFERASE_ACTIVITY	SET	5	13519	0.021808	0.38706	0.00023967
GO_MESENCHYMAL_STEM_CELL_PROLIFERATION	SET	3	1345	0.016807	0.3851	0.00023979
GO_NEURONAL_STEM_CELL_POPULATION_MAINTENANCE	SET	22	0.73286	0.024787	0.21089	0.00025595
GCM_SIRT2	SET	45	0.38205	0.01847	0.11113	0.00029405
REACTOME_SIGNALING_BY_NOTCH1_T_7_9_NOTCH1:M1580_K2555_TRANSLOCATION_MUTANT	SET	7	0.93378	0.017822	0.2727	0.00030902
GO_CELL_DIFFERENTIATION_INVOLVED_IN_KIDNEY_DEVELOPMENT	SET	53	0.42077	0.022071	0.12327	0.0003216
GSE39820_CTRL_VS_TGFBETA3_IL6_IL23A_CD4_TCELL_DN	SET	196	0.194	0.019496	0.056915	0.00032729
YANG_BREAST_CANCER_ESR1_BULK_UP	SET	25	0.5726	0.020644	0.168	0.00032751
GO_OXIDOREDUCTASE_ACTIVITY_OXIDIZING_METAL_IONS	SET	17	0.70417	0.020939	0.20666	0.00032862
TGAGATT_MIR216	SET	106	0.2724	0.020179	0.080284	0.00034652
GSE21927_HEALTHY_VS_TUMOROUS_BALBC_MOUSE_MONOCYTE_DN	SET	158	0.22251	0.020097	0.065754	0.00035808
GSE1566_WT_VS_EZH2_KO_LN_TCELL_DN	SET	186	0.19638	0.019231	0.058036	0.00035827
GO_REGULATION_OF_INNER_EAR_AUDITORY_RECEPTOR_CELL_DIFFERENTIATION	SET	8	10749	0.021932	0.31817	0.00036545
chr6p22	SET	163	0.63304	0.058066	0.1879	0.00037798
GO_TETRASPANIN_ENRICHED_MICRODOMAIN	SET	8	0.88732	0.018104	0.26404	0.00038975
GO_B_CELL_HOMEOSTASIS	SET	29	0.50329	0.01954	0.14994	0.00039557
GO_EPITHELIAL_CELL_DIFFERENTIATION_INVOLVED_IN_KIDNEY_DEVELOPMENT	SET	43	0.46113	0.021793	0.1386	0.00043983
GNF2_UBE2I	SET	44	0.37559	0.017955	0.11307	0.00044849
GSE3982_NKCELL_VS_TH1_UP	SET	185	0.21428	0.020928	0.0647	0.00046418
GO_NEGATIVE_REGULATION_OF_CELL_POPULATION_PROLIFERATION	SET	668	0.10735	0.019668	0.032459	0.00047212
BIOCARTA_CASPASE_PATHWAY	SET	22	0.51304	0.017352	0.15515	0.00047292
GCM_CSNK1D	SET	32	0.44631	0.018201	0.13511	0.0004787
GSE27859_CD11C_INT_F480_HI_MACROPHAGE_VS_CD11C_ING_F480_INT_DC_DN	SET	199	0.1863	0.018863	0.056504	0.00048949
YAO_TEMPORAL_RESPONSE_TO_PROGESTERONE_CLUSTER_12	SET	77	0.30812	0.019469	0.093844	0.00051411
GTGCAAA_MIR507	SET	128	0.25057	0.020386	0.076389	0.00051963
REACTOME_INTERLEUKIN_36_PATHWAY	SET	7	13292	0.025369	0.40575	0.00052783
GCM_DEAF1	SET	27	0.44063	0.016508	0.13466	0.00053487
GO_FATTY_ACID_BIOSYNTHETIC_PROCESS	SET	145	0.22009	0.01905	0.067284	0.0005368
GO_LIPOPHAGY	SET	6	10486	0.018529	0.32269	0.00057927
REACTOME_SIGNALING_BY_NOTCH1_HD_DOMAIN_MUTANTS_IN_CANCER	SET	15	0.64362	0.017979	0.19844	0.0005917
AGCYRWTTC_UNKNOWN	SET	121	0.24005	0.018992	0.074083	0.00059812
BIOCARTA_HIVNEF_PATHWAY	SET	56	0.34102	0.018386	0.1056	0.00062128
GO_CYSTEINE_TYPE_ENDOPEPTIDASE_ACTIVITY_INVOLVED_IN_APOPTOTIC_PROCESS	SET	15	0.65503	0.018297	0.20301	0.0006275
GO_CLATHRIN_DEPENDENT_ENDOCYTOSIS	SET	40	0.40834	0.018614	0.12709	0.00065797
MORF_ACTG1	SET	136	0.21513	0.018038	0.066962	0.0006585
GSE17721_POLYIC_VS_PAM3CSK4_4H_BMDC_DN	SET	198	0.17963	0.018143	0.055929	0.00066088
GSE43863_TH1_VS_LY6C_INT_CXCR5POS_EFFECTOR_CD4_TCELL_DN	SET	200	0.19235	0.019525	0.059928	0.00066547
SNIJDERS_AMPLIFIED_IN_HEAD_AND_NECK_TUMORS	SET	37	0.45822	0.020091	0.14281	0.00066796
XU_HGF_TARGETS_INDUCED_BY_AKT1_48HR_UP	SET	13	0.72623	0.018886	0.22637	0.00066911
SENESE_HDAC1_AND_HDAC2_TARGETS_DN	SET	221	0.17801	0.018984	0.055633	0.00068886
YATTNATC_UNKNOWN	SET	375	0.1394	0.019286	0.043614	0.00069774
GO_ORGANIC_ACID_BIOSYNTHETIC_PROCESS	SET	288	0.15422	0.018742	0.048258	0.00069863
REACTOME_APOPTOTIC_CLEAVAGE_OF_CELLULAR_PROTEINS	SET	38	0.4339	0.01928	0.13586	0.00070373
GO_REGULATION_OF_STRESS_ACTIVATED_PROTEIN_KINASE_SIGNALING_CASCADE	SET	225	0.17467	0.018793	0.054798	0.00071888
GO_DETECTION_OF_EXTERNAL_BIOTIC_STIMULUS	SET	18	0.58043	0.017759	0.18325	0.00077031
GSE1740_MCSF_VS_MCSF_AND_IFNG_DAY2_DERIVED_MACROPHAGE_WITH_IFNA_STIM_UP	SET	197	0.1785	0.017984	0.056653	0.00081546
GSE21670_TGFB_VS_TGFB_AND_IL6_TREATED_CD4_TCELL_UP	SET	199	0.18305	0.018534	0.058261	0.00084098
GSE26890_CXCR1_NEG_VS_POS_EFFECTOR_CD8_TCELL_DN	SET	199	0.18843	0.019079	0.059978	0.00084145
ZHENG_FOXP3_TARGETS_IN_THYMUS_UP	SET	193	0.20631	0.020576	0.06579	0.00085804
GSE42088_UNINF_VS_LEISHMANIA_INF_DC_2H_UP	SET	199	0.18204	0.018432	0.058205	0.00088301
chr3p21	SET	204	0.58522	0.059988	0.18794	0.00092481
GSE2585_CD80_HIGH_VS_LOW_MTEC_DN	SET	186	0.18239	0.01786	0.058747	0.00095407
FOX_Q2	SET	209	0.18561	0.019255	0.05995	0.00098228
MOLENAAR_TARGETS_OF_CCND1_AND_CDK4_UP	SET	64	0.31622	0.018222	0.10216	0.00098495
GSE13411_NAIVE_VS_IGM_MEMORY_BCELL_UP	SET	188	0.18169	0.017886	0.059269	0.0010881
GO_CLATHRIN_COAT_ASSEMBLY	SET	19	0.54132	0.017016	0.17663	0.0010915
GO_OXIDOREDUCTASE_ACTIVITY_ACTING_ON_PEROXIDE_AS_ACCEPTOR	SET	56	0.36091	0.019458	0.11777	0.0010915
TESAR_ALK_TARGETS_HUMAN_ES_5D_DN	SET	7	0.99561	0.019002	0.32534	0.0011075
GSE1112_OT1_CD8AB_VS_HY_CD8AA_THYMOCYTE_RTOC_CULTURE_UP	SET	150	0.19837	0.017461	0.064881	0.0011178
GSE20754_WT_VS_TCF1_KO_MEMORY_CD8_TCELL_DN	SET	198	0.1718	0.017352	0.056302	0.0011407
GO_LYMPHOCYTE_HOMEOSTASIS	SET	62	0.29831	0.01692	0.097886	0.0011554
GO_ASYMMETRIC_STEM_CELL_DIVISION	SET	10	0.77644	0.017711	0.25574	0.0012001
MODULE_552	SET	18	0.60345	0.018464	0.19877	0.0012011
GSE9650_NAIVE_VS_EFF_CD8_TCELL_DN	SET	199	0.18796	0.019032	0.061976	0.0012135
GSE20152_SPHK1_KO_VS_WT_HTNFA_OVERXPRESS_ANKLE_DN	SET	196	0.17233	0.017319	0.056831	0.0012151
LE_EGR2_TARGETS_DN	SET	104	0.22343	0.016396	0.073988	0.0012664
GSE4984_UNTREATED_VS_LPS_TREATED_DC_UP	SET	176	0.18438	0.017568	0.061058	0.001267
HNF3ALPHA_Q6	SET	208	0.1726	0.017864	0.057294	0.0012971
GSE15330_HSC_VS_MEGAKARYOCYTE_ERYTHROID_PROGENITOR_DN	SET	186	0.17778	0.017409	0.059015	0.0012975
BIOCARTA_TERT_PATHWAY	SET	8	0.79041	0.016127	0.26307	0.0013318
GO_PROTEIN_ADP_RIBOSYLATION	SET	33	0.42841	0.017742	0.14265	0.0013375
GO_LONG_CHAIN_FATTY_ACID_TRANSPORTER_ACTIVITY	SET	11	0.72466	0.017336	0.24135	0.0013405
GAGACTG_MIR452	SET	94	0.25196	0.017583	0.083985	0.0013515
GO_LIPOPOLYSACCHARIDE_RECEPTOR_COMPLEX	SET	5	11639	0.018776	0.38798	0.0013521
GO_OXIDOREDUCTASE_ACTIVITY_ACTING_ON_DIPHENOLS_AND_RELATED_SUBSTANCES_AS_DONORS	SET	9	0.75575	0.016355	0.25218	0.0013657
CLIMENT_BREAST_CANCER_COPY_NUMBER_UP	SET	23	0.55638	0.019241	0.1857	0.0013694
GO_NETRIN_ACTIVATED_SIGNALING_PATHWAY	SET	12	0.71307	0.017817	0.23995	0.0014827
GO_MITRAL_VALVE_DEVELOPMENT	SET	11	0.77891	0.018634	0.26229	0.0014928
GSE17301_CTRL_VS_48H_ACD3_ACD28_STIM_CD8_TCELL_UP	SET	196	0.17339	0.017425	0.058508	0.0015225
TESAR_ALK_TARGETS_HUMAN_ES_4D_DN	SET	6	0.99051	0.017503	0.33458	0.0015382
GO_NAD_P_H_OXIDASE_ACTIVITY	SET	8	0.74325	0.015165	0.25185	0.0015852
GO_ENDOCYTIC_VESICLE_MEMBRANE	SET	159	0.20117	0.018226	0.068203	0.0015936
TESAR_ALK_AND_JAK_TARGETS_MOUSE_ES_D4_DN	SET	6	10101	0.017849	0.34255	0.0015975
GO_JNK_CASCADE	SET	209	0.1684	0.017469	0.057142	0.0016066
GSE12845_IGD_NEG_BLOOD_VS_DARKZONE_GC_TONSIL_BCELL_DN	SET	199	0.16412	0.016618	0.055694	0.0016072
GSE22886_NAIVE_CD4_TCELL_VS_DC_DN	SET	199	0.17079	0.017293	0.057985	0.0016149
TGACAGNY_MEIS1_01	SET	838	0.088188	0.018013	0.030011	0.001651
HOLLERN_SOLID_NODULAR_BREAST_TUMOR_UP	SET	11	0.72259	0.017287	0.24606	0.001661
SCHUETZ_BREAST_CANCER_DUCTAL_INVASIVE_DN	SET	82	0.2654	0.017303	0.090424	0.0016695
GO_TRICUSPID_VALVE_MORPHOGENESIS	SET	5	11446	0.018464	0.39067	0.0016981
GSE5455_HEALTHY_VS_TUMOR_BEARING_MOUSE_SPLEEN_MONOCYTE_24H_INCUBATION_UP	SET	198	0.16548	0.016714	0.056483	0.001699
GO_NEGATIVE_REGULATION_OF_EPITHELIAL_CELL_DIFFERENTIATION	SET	39	0.40908	0.018414	0.13986	0.0017246
GSE24102_GRANULOCYSTIC_MDSC_VS_NEUTROPHIL_DN	SET	196	0.17302	0.017388	0.059153	0.0017248
PAPASPYRIDONOS_UNSTABLE_ATEROSCLEROTIC_PLAQUE_DN	SET	42	0.39874	0.018624	0.13637	0.0017307
GO_TRICUSPID_VALVE_DEVELOPMENT	SET	6	10091	0.017831	0.3456	0.0017538
GSE9509_LPS_VS_LPS_AND_IL10_STIM_IL10_KO_MACROPHAGE_20MIN_DN	SET	193	0.1709	0.017044	0.058533	0.0017539
GSE24634_NAIVE_CD4_TCELL_VS_DAY3_IL4_CONV_TREG_DN	SET	200	0.16777	0.01703	0.05748	0.0017595
MEF2_02	SET	230	0.15967	0.017367	0.054769	0.0017791
GO_VERY_LONG_CHAIN_FATTY_ACID_CATABOLIC_PROCESS	SET	5	11334	0.018283	0.38939	0.0018062
GO_DETECTION_OF_MOLECULE_OF_BACTERIAL_ORIGIN	SET	11	0.69833	0.016706	0.23996	0.0018085
GSE2405_0H_VS_3H_A_PHAGOCYTOPHILUM_STIM_NEUTROPHIL_UP	SET	199	0.1706	0.017274	0.058622	0.0018087
NUNODA_RESPONSE_TO_DASATINIB_IMATINIB_UP	SET	29	0.40422	0.015694	0.13918	0.0018432
TBP_01	SET	242	0.15504	0.017292	0.053422	0.0018558
GCM_IL6ST	SET	55	0.29574	0.015802	0.10203	0.0018773
GO_HISTONE_PRE_MRNA_3_END_PROCESSING_COMPLEX	SET	6	0.7893	0.013948	0.27292	0.0019163
GO_POLYAMINE_METABOLIC_PROCESS	SET	10	0.72025	0.016429	0.24919	0.0019268
GSE21670_UNTREATED_VS_TGFB_TREATED_STAT3_KO_CD4_TCELL_DN	SET	193	0.17676	0.017628	0.061221	0.0019458
GO_ALPHA_DNA_POLYMERASE_PRIMASE_COMPLEX	SET	4	1339	0.01932	0.4639	0.0019513
GO_C_C_CHEMOKINE_BINDING	SET	24	0.54021	0.019083	0.18744	0.0019781
GO_EPITHELIAL_CELL_FATE_COMMITMENT	SET	17	0.66007	0.019628	0.22918	0.0019898
ZHOU_PANCREATIC_BETA_CELL	SET	11	0.68147	0.016303	0.23673	0.0019994
BIOCARTA_STATHMIN_PATHWAY	SET	20	0.53632	0.017297	0.18648	0.0020159
MODULE_273	SET	52	0.31072	0.016145	0.10817	0.002039
GO_GERMINAL_CENTER_FORMATION	SET	15	0.56234	0.015708	0.19608	0.0020684
PID_TAP63_PATHWAY	SET	54	0.30144	0.01596	0.10532	0.0021064
CEBPA_01	SET	255	0.15263	0.017468	0.053339	0.0021108
GO_RESPONSE_TO_STAUROSPORINE	SET	5	0.82852	0.013365	0.28976	0.0021253
GO_MANCHETTE	SET	9	0.86731	0.018769	0.30372	0.0021503
GO_POSITIVE_REGULATION_OF_PEPTIDYL_LYSINE_ACETYLATION	SET	32	0.40101	0.016354	0.14045	0.0021527
GO_HINDLIMB_MORPHOGENESIS	SET	36	0.4223	0.018265	0.14807	0.0021744
GO_MECHANOSENSORY_BEHAVIOR	SET	15	0.6443	0.017997	0.22598	0.0021811
GSE34515_CD16_POS_MONOCYTE_VS_DC_UP	SET	200	0.16223	0.016467	0.057068	0.0022395
REACTOME_RUNX3_REGULATES_YAP1_MEDIATED_TRANSCRIPTION	SET	8	0.90012	0.018365	0.31674	0.0022458
GO_REGULATION_OF_ERAD_PATHWAY	SET	29	0.40965	0.015905	0.14422	0.0022554
GO_PHOSPHOLIPID_HOMEOSTASIS	SET	10	0.71962	0.016415	0.25339	0.0022586
GSE38697_LIGHT_ZONE_VS_DARK_ZONE_BCELL_UP	SET	180	0.16868	0.016252	0.059405	0.0022616
GSE1925_CTRL_VS_IFNG_PRIMED_MACROPHAGE_24H_IFNG_STIM_DN	SET	198	0.1589	0.016049	0.055985	0.002271
GSE25146_UNSTIM_VS_HELIOBACTER_PYLORI_LPS_STIM_AGS_CELL_UP	SET	189	0.15954	0.015747	0.056212	0.0022714
CEBP_C	SET	203	0.17012	0.017396	0.059957	0.0022768
GO_REGULATION_OF_ER_ASSOCIATED_UBIQUITIN_DEPENDENT_PROTEIN_CATABOLIC_PROCESS	SET	9	0.77516	0.016775	0.27329	0.0022838
GO_RESPONSE_TO_SORBITOL	SET	5	10285	0.016591	0.36268	0.0022889
GCM_BMPR2	SET	85	0.23845	0.015827	0.084123	0.0022973
MOOTHA_GLUCONEOGENESIS	SET	31	0.42553	0.017081	0.15035	0.0023287
SRY_01	SET	224	0.16165	0.017354	0.057165	0.0023471
GSE11961_MEMORY_BCELL_DAY7_VS_PLASMA_CELL_DAY7_DN	SET	200	0.16194	0.016438	0.057309	0.0023613
GO_ACTIVIN_ACTIVATED_RECEPTOR_ACTIVITY	SET	7	0.83747	0.015984	0.29669	0.0023838
GSE4535_BM_DERIVED_DC_VS_FOLLICULAR_DC_DN	SET	196	0.16093	0.016173	0.057063	0.0024021
REACTOME_TRNA_PROCESSING_IN_THE_NUCLEUS	SET	58	0.26607	0.014598	0.094519	0.0024418
GO_PULMONARY_ARTERY_MORPHOGENESIS	SET	6	0.93384	0.016502	0.33234	0.0024806
GO_ACYL_COA_DEHYDROGENASE_ACTIVITY	SET	11	0.65156	0.015587	0.23197	0.0024894
SCHAEFFER_PROSTATE_DEVELOPMENT_AND_CANCER_BOX4_UP	SET	11	0.73962	0.017694	0.26349	0.0025034
GO_PHOSPHATIDYLCHOLINE_METABOLIC_PROCESS	SET	41	0.34957	0.016133	0.12484	0.0025572
GO_OXIDOREDUCTASE_ACTIVITY_OXIDIZING_METAL_IONS_NAD_OR_NADP_AS_ACCEPTOR	SET	8	0.89289	0.018218	0.31904	0.0025686
ZHANG_RESPONSE_TO_IKK_INHIBITOR_AND_TNF_DN	SET	103	0.22983	0.016785	0.082157	0.002578
GO_MALATE_DEHYDROGENASE_ACTIVITY	SET	8	0.7141	0.01457	0.2553	0.0025814
FUNG_IL2_SIGNALING_1	SET	10	0.68602	0.015648	0.2456	0.0026122
GAUSSMANN_MLL_AF4_FUSION_TARGETS_D_DN	SET	10	0.7153	0.016316	0.2562	0.0026224
[truncated: 22,402 more rows]
